# Supplementary material for: Southern Chinese populations harbour non-nucleatum Fusobacteria possessing homologues of the colorectal cancer-associated FadA virulence factor
Source: HighWire-hosted journal article supplement (doi:10.1136/gutjnl-2019-319635), 2020-02-12
Supplement: gutjnl-2019-319635supp001_data_supplement.xlsx [file gutjnl-2019-319635supp001_data_supplement.xlsx]

## Sheet: Table legend
Tables	Notes
Table S1. Human gut metagenome data sets included in this study.
Table S2. Basic parameters of the HKGutMicMap cohort.
Table S3. Average relative abundances of gut microbial phyla in non-CRC cohorts.
Table S4. Prevalence and relative abundances of fusobacterial species in CRC subjects
Table S5. Prevalence and relative abundances of fusobacterial species in non-CRC cohorts from CRC case-control studies	Corresponding CRC subjects are in Table S4
Table S6. Fusobacterial genomes in RefSeq database release 89.
Table S7. Fusobacterial genomes included in this study.
Table S8. Average percentage of non-CRC gut metagenome reads mapped to dereplicated fusobacterial genomes.
Table S9. Average percentage of CRC gut metagenome reads mapped to dereplicated fusobacterial genomes.
Table S10. Pairwise average nucleotide identity comparisons among dereplicated fusobacterial genomes.	Predicted species indicated by alternating blue and orange row colours
Table S11. Clusters of genomes formed during genome dereplication.
Table S12. Prevalence of KEGG orthologous groups in the Fusobacterium clades.	Counts represent number of genomes in each clade that contain the corresponding KO
Table S13. FadA homologues found in fusobacterial genomes.
Table S14. Fap2 homologues found in fusobacterial genomes.
Table S15. Genome characteristics of eight fusobacteria isolated from frozen stools.

## Sheet: Table S1
publication	Publication title	country	Number of samples	remarks
Li et al., 2014	An integrated catalog of reference genes in the human gut microbiome	Denmark	163
Li et al., 2014	An integrated catalog of reference genes in the human gut microbiome	Spain	219
Brito et al., 2016	Mobile genes in the human microbiome are structured from global to individual scales	Fiji	176
Karlsson et al., 2013	Gut metagenome in European women with normal, impaired and diabetic glucose control	Sweden	43
Bäckhed et al., 2015	Dynamics and Stabilization of the Human Gut Microbiome during the First Year of Life	Sweden	100
Zeevi et al., 2015	Personalized Nutrition by Prediction of Glycemic Responses	Israel	150
Pehrsson et al., 2016	Interconnected microbiomes and resistomes in low-income human habitats	Peru	77
Pehrsson et al., 2016	Interconnected microbiomes and resistomes in low-income human habitats	El Salvador	114
Liu et al., 2016	Unique Features of Ethnic Mongolian Gut Microbiome revealed by metagenomic analysis	Mongolia	110
Qin et al., 2014	Alterations of the human gut microbiome in liver cirrhosis	Zhejiang (China)	144
Smits et al., 2017	Seasonal cycling in the gut microbiome of the Hadza hunter-gatherers of Tanzania	Tanzania	40
Rampelli et al., 2015	Metagenome Sequencing of the Hadza Hunter-Gatherer Gut Microbiota	Tanzania	27
Vogtmann et al., 2016	Colorectal Cancer and the Human Gut Microbiome: Reproducibility with Whole-Genome Shotgun Sequencing	USA	104	52 non-CRC, 52 CRC
Feng et al., 2015	Gut microbiome development along the colorectal adenoma–carcinoma sequence	Austria	156	63 non-CRC, 93 CRC
Zeller et al., 2014	Potential of fecal microbiota for early-stage detection of colorectal cancer	Germany	43	5 non-CRC, 38 CRC
Zeller et al., 2014	Potential of fecal microbiota for early-stage detection of colorectal cancer	France	156	61 non-CRC, 95 CRC
Qin et al., 2012	A metagenome-wide association study of gut microbiota in type 2 diabetes	Shenzhen (China)	37
Coker et al., 2019	Enteric fungal microbiota dysbiosis and ecological alterations in colorectal cancer	Hong Kong (China)	423	133 non-CRC, 290 CRC
Yu et al., 2017	Metagenomic analysis of faecal microbiome as a tool towards targeted non-invasive biomarkers for colorectal cancer	Hong Kong (China)	166	92 non-CRC, 74 CRC
The Human Microbiome Project Consortium, 2012	Structure, function and diversity of the healthy human microbiome	USA	153

## Sheet: Table S2
sample ID	age (years)	gender	BMI	weight (kg)	height (cm)	waist_circumference (cm)	upper_blood_pressure (mm Hg)	lower_blood_pressure (mm Hg)
pHMST295	18	female	18.26	46.45	159.5	62	100	57
PHMST14	19	male	25.1	71.8	169	92.5	106	64
PHMST266	19	female	21.5	62.25	170.5	79	101	54
pHMST291	19	male	19.4	56.15	170	80	113	63
pHMST301	19	male	20.9	60.3	170	76	112	62
pHMST302	19	female	20.88	47.3	150.5	68	116	66
pHMST305	19	female	23.8	60.5	159.5	78	97	61
pHMST309	19	male	21.2	57.75	165.5	69	120	67
pHMST312	19	male	21.13	55.8	162.5	69	131	62
pHMST455	19	male	21.59	63.5	171.5	72	137	66
PGHST0095	20	male	21.9	61.1	167	80	120	64
PHMST264	20	male	21.4	63.45	172	71	131	81
PHMST265	20	female	17.6	45.4	160.5	64	108	62
PHMST276	20	male	18.95	61.4	180	71	114	64
pHMST290	20	female	17.2	42.75	157.5	63.5	106	60
pHMST292	20	male	21.05	60.85	170	69	124	63
pHMST457	20	male	19.7	48.95	157.5	68	105	63
PHMST9R	21	male	20.5	60.08	171	74	114	55
PHMST26	21	female	19.45	42.6	148	63	121	95
PHMST34	21	female	18.8	48.1	160.5	63	129	72
PHMST40	21	male	19.4	62.4	179.5	74.5	120	71
PHMST47	21	male	24.2	66.7	166	89	121	66
PHMST90	21	male	24.26	66.85	166	82.5	134	81
PHMST0002	21	male	22.5	69	175.5	86.5	130	62
PHMST0004	21	female	20.94	58.75	167.5	70	108	62
PHMST0007	21	male	20.8	54	161	74.5	107	54
PHMST0010	21	female	20.8	54.1	161	65.5	106	68
PHMST111	21	male	20.9	61	171.5	75.5	122	54
PHMST115	21	female	20.2	53.7	163.5	75	113	68
PHMST117	21	female	20	54.55	165	70.5	96	48
PHMST144	21	male	20.53	57.6	167.5	79	119	69
PHMST146	21	male	21.5	66.25	175.5	86	144	77
PHMST207	21	male	22.9	64.5	168	79	141	116
PHMST270	21	female	20.9	53.25	159.5	70	135	73
pHMST336	21	male	18.8	58.95	177	78	124	68
pHMST369	21	female	20.8	53.7	160.5	69.5	92	62
pHMST400	21	female	22.5	63.75	168.5	72	119	66
pHMST417	21	male	22.3	72.8	180.5	80	115	55
pHMST419	21	male	22.6	67.8	173.5	68	121	72
pHMST445	21	male	18.69	54.35	170.5	68.5	120	63
pHMST452	21	male	19.4	62.95	180.5	76	116	58
PHMST39	22	female	19.2	52.3	165	69	121	67
PGHST0061	22	male	22.86	70	175	81.5	134	68
PGHST0076	22	male	18.8	50.75	164.5	68.5	115	67
PHMST0003	22	female	22.27	53.85	155.5	72.5	103	48
PHMST116	22	female	20	55.9	167	70	126	67
PHMST127	22	male	23.3	68.3	171	82	145	75
PHMST137	22	male	22.97	59.55	161	81.5	119	67
PHMST141	22	female	18.3	52.3	169	63	100	55
PHMST142	22	male	22.46	68	174	78	123	72
PHMST147	22	male	22.4	67	173	77.8	108	57
PHMST209	22	female	19.9	45.05	150.5	65	100	73
PHMST222	22	male	22.09	64.6	171	89	115	64
PHMST223	22	male	23.8	70.45	172	79	121	82
PHMST231	22	female	20.39	48.95	155	67	108	56
PHMST279	22	male	19.4	60.5	176.5	82	120	80
pHMST304	22	male	23.5	73.75	177	83	123	71
pHMST363	22	male	22.6	72.85	179.5	85	131	64
pHMST367	22	female	17.12	43.85	160.5	64	99	62
pHMST382	22	female	18.32	46.9	160	65	90	61
pHMST386	22	female	24.5	58.5	154.5	79	87	48
pHMST412	22	female	16.6	42	159.5	65	89	55
pHMST433	22	male	19	66.5	187	80	97	54
pHMST454	22	male	26.3	75.15	169	86	151	75
pHMST489	22	female	16.3	43.75	164	63	113	74
PHMST23	23	female	23.4	60.3	160.5	80	102	60
PHMST45	23	male	22.7	62.5	166	73	126	63
PHMST86	23	female	19.3	53.9	167	79	112	70
PHMST91	23	female	23.98	69.3	170	81.5	122	83
PHMST0008	23	female	28.5	75.12	162.5	96.5	115	73
PHMST108	23	male	18	62.25	186	77.5	113	63
PHMST110	23	male	24.7	76.9	176.5	91.5	122	65
PHMST124	23	male	18.8	60.9	180	74	118	70
PHMST131	23	male	23	65.7	169.5	83	127	78
PHMST133	23	female	22.5	56.2	158	83	92	51
PHMST134	23	female	19.3	48.2	158	71	88	53
PHMST167	23	female	20	54.35	165	77	107	63
PHMST221	23	male	22.61	68.85	174.5	87	129	86
PHMST262	23	male	21.1	61.65	171	78	109	52
PHMST268	23	female	19.38	56.35	170.5	69	118	66
PHMST271	23	male	19.6	56.95	170.5	77	115	67
PHMST272	23	male	26.7	77.75	170.5	87	126	64
PHMST278	23	male	25.5	73.85	170.5	82.5	125	75
PHMST282	23	female	17.1	42.65	158	66	93	46
pHMST297	23	female	19	48.35	159.5	68	110	62
pHMST352	23	female	20.7	53.1	160.5	71.5	93	67
pHMST360	23	female	18.7	49.9	163	71	99	55
pHMST376	23	female	22.6	53.6	154	67	131	71
pHMST377	23	male	26.1	75.5	170	94	115	65
pHMST415	23	male	17.1	52.35	175.5	70	114	72
pHMST458	23	female	20.8	55	162.5	71	107	66
PHMST38	24	male	24.1	76.5	178	91	126	68
PHMST100	24	female	21.15	56.2	163.5	69	124	67
PHMST101	24	female	19.9	53.5	164	80	124	57
PHMST138	24	female	19.8	50	159	82	117	69
PHMST245	24	male	20.8	66.65	179	74.5	134	80
PHMST253	24	female	24.16	54	149.5	73	115	73
PHMST256	24	male	22.03	71.4	180	82	134	76
PHMST261	24	male	26.8	83.4	176.5	98.5	134	70
PHMST273	24	female	20.06	52.65	162	75	109	64
PHMST275	24	female	23.45	63.85	165	84	116	60
PHMST277	24	female	23.5	63.25	164	80	111	55
PHMST280	24	female	16.6	41.35	158	66	116	80
PHMST283	24	female	22.7	66.4	171	84	110	53
pHMST287	24	female	17.27	40.7	153.5	63	112	59
pHMST294	24	female	24.8	57.7	152	71	122	65
pHMST342	24	female	18.7	41.6	149	73	85	49
pHMST370	24	female	18.7	49.45	162.5	72	106	58
pHMST421	24	female	19.4	52.2	164	69	105	48
pHMST427	24	female	19.1	51.55	164.5	65.5	87	60
PHMST41	25	male	20.3	60.7	173	71	129	75
PHMST43	25	female	22.9	55.35	155.5	79	98	57
PGHST0002	25	male	23.7	66.15	167	79	129	68
PHMST0006	25	male	23.8	66.9	167.5	79	131	69
PHMST120	25	male	21.1	57.45	165.5	71.5	135	79
PHMST168	25	female	20.6	56.05	165	72	107	57
PHMST170	25	male	22.6	72	178.5	86	116	60
PHMST260	25	female	25	62.75	158.5	83	108	66
PHMST274	25	female	23.66	62.1	162.5	91	108	63
PHMST281	25	male	30	104.2	186.5	103	138	69
pHMST405	25	male	22.7	66.35	171	87	141	92
pHMST463	25	female	21.4	51.6	155.5	70	101	63
pHMST465	25	female	23.2	65.5	164	70	111	68
PHMST68	26	male	17.7	48.5	165.5	68	127	70
PHMST136	26	female	23.7	59.9	159	79	116	76
PHMST166	26	male	21.5	64.35	173	81	125	67
pHMST359	26	female	26.09	63.5	156.5	92	117	67
pHMST378	26	female	22.19	54	156	72.5	89	48
pHMST416	26	male	22.7	70.3	176.5	86	136	68
pHMST428R	27	female	20	53.9	154	76	115	67
pHMST296	27	male	26.37	81.7	176	103.5	135	72
pHMST372	27	female	18.27	50.35	166	78	109	66
pHMST444	27	female	24	67.2	167.5	81	102	61
PHMST98	28	female	20.99	55.1	162	75.5	130	99
PHMST119	28	female	20.9	50	154.5	74.5	124	75
PGHST0074	29	female	19.5	55	168	69	97	64
PHMST220	29	male	20.3	62.35	175	80	117	65
PHMST284	29	female	17.01	44.15	161	67	119	79
pHMST373	29	male	21.4	60.45	168	71	113	68
PHMST25	30	female	20	48.2	155.5	69	107	66
pHMST366	30	male	21.7	61.25	168	77	113	63
pHMST389	30	female	24.9	59.2	154.5	81	106	70
PHMST169	31	female	28.1	78.35	167.5	97	121	72
PHMST244	31	female	18.3	42.9	153.5	71	108	67
pHMST300	31	female	26.4	62.8	154	82	107	67
pHMST306	31	male	18.72	54.75	171	69	110	87
PHMST17	32	female	22.59	59.65	162.5	84.5	103	64
PHMST74	32	male	20.3	63.3	176.5	79.5	136	72
PHMST130	32	female	24.3	60.8	158	83	117	70
PHMST174	32	male	17.6	49.8	168	67	129	77
PHMST182	32	female	19.9	55.45	167	76	120	82
PHMST258	32	female	24.68	69.25	167.5	90	110	67
pHMST490	32	female	19.3	45.1	153	72	98	55
pHMST497	32	male	25.5	79	176	98	114	61
PHMST212	33	male	30.65	86.5	168	102	119	58
pHMST404	33	female	33	68.5	144	90	97	67
pHMST451	33	female	20.1	50.9	159	65	103	59
pHMST472	33	female	18.51	53.5	170.5	75	98	53
pHMST474	33	female	16.1	38.75	155	57	110	72
PHMST37	34	female	25.9	67.95	162	91.5	119	72
PGHST0003	34	female	18.1	44.05	156.5	65.5	96	68
PHMST173	34	female	25.67	66.55	161	82	120	58
pHMST402	34	male	22.6	61.45	165	74	128	60
pHMST414	34	female	20.8	46.55	149.5	67.5	94	58
PHMST19	35	female	20.19	47.9	153.5	71.5	104	72
PHMST46	35	female	18.6	48.5	161.5	67	92	51
PHMST143	35	female	19.7	52.05	162.5	74	116	77
pHMST371	35	male	26.3	77.8	172	97.5	125	69
pHMST411	35	male	22.7	61.95	165.5	84	116	71
PGHST0053	36	female	19.2	45.6	154.5	72	109	69
pHMST368	36	male	21.57	67.6	177	85	129	78
pHMST374	36	female	20.3	55.95	166	70	112	76
pHMST409	36	female	21.9	60	165.5	76	110	77
PHMST103	37	female	22.7	50.35	149	82	105	74
pHMST332	37	female	21.9	57	161.5	80	106	62
pHMST387	37	female	34.1	90.7	163.5	114	104	75
PHMST252	39	female	23.4	62.05	163	85	106	63
PHMST263	39	female	25.83	64.5	158	88	106	50
pHMST426	39	female	18.5	46.7	159.5	67	107	80
PHMST28	40	male	26.1	74.45	169	90	102	61
PHMST31	40	female	19.6	49.6	159	69	110	69
pHMST331	40	female	17.41	42.65	156.5	63	103	60
pHMST345	40	male	23.8	72.5	174.5	89.5	125	86
pHMST418	40	male	21.8	69.1	178	86	121	71
PHMST105	41	male	29.1	81.15	171	93	188	122
pHMST362	41	male	28.5	84	172	102	127	88
pHMST388	41	male	26.2	73.4	167.5	90	127	72
PHMST48	42	male	28.2	94.45	183	100.5	115	66
PHMST15	42	female	25.5	68.25	163.5	86	131	70
PHMST29	42	male	21.8	74.05	184.5	86	118	67
PHMST44	42	male	36.2	99.8	166	111	166	114
PGHST0058	42	male	22.2	68	175	87	132	90
PHMST0011	42	male	23	69.15	173	85	97	66
PHMST257	42	male	24.48	77.15	177.5	85	120	90
pHMST494	42	male	24.6	64.5	162.5	89	128	79
pGHST102	43	female	24.17	60.35	158	80	129	80
PHMST18	43	female	21.63	54	157.5	78.5	94	63
PHMST33	43	male	31.5	90	169	103.5	143	95
PGHST0018	43	female	23	54.65	154.5	77	117	69
pHMST453	43	male	19.8	59.15	173	81	110	54
PHMST13	44	female	20.83	54.05	161.5	78	122	71
PHMST27	44	male	24.9	79.95	179	93	167	96
PHMST83	44	male	23.4	63.8	165	89.5	115	63
PGHST0062	44	male	25	81	177	95	133	77
pHMST498	44	female	23.13	56.3	156	86	122	66
pHMST145R	45	female	17.3	42.55	157	80	119	75
PHMST63	45	female	24.6	65.3	163	83	146	106
PHMST65	45	male	24.1	73.75	175	94	143	91
PGHST0029	45	male	25.9	69	163	92	131	78
PGHST0031	45	male	29.6	82.45	167.5	90.5	138	84
PGHST0060	45	female	15.7	40.3	160	72	100	60
PHMST240	45	female	25.4	55.65	148	82.5	107	70
pHMST350	45	female	22	51.6	153	83	115	68
pHMST443	45	male	24.6	66.2	164	88	152	99
pHMST364R	46	female	20.35	55.75	165.5	75	112	69
PHMST22	46	female	27.9	75.05	164	93.5	110	63
PGHST0067	46	male	19.5	53	165	74.5	108	57
PGHST0099	46	female	26.42	64	156	89	136	84
PHMST128	46	female	23.6	58.9	158	90	144	84
pHMST361	46	female	24	67	167	90	111	77
pHMST390	46	male	32	90.2	168	99	114	74
pHMST396	46	male	30.3	87.65	170	106	169	104
pHMST429	46	female	23.7	58.55	157	87	137	82
pHMST504	46	female	17.4	43.95	159	66	87	59
pHMST393R	47	male	24.9	73.65	172	97	137	91
PHMST30	47	female	21.6	51.85	155.5	79	101	67
PHMST55	47	female	19	51.1	164	72	136	89
PGHST0026	47	male	21.2	65.05	174	84.5	143	74
PHMST214	47	male	20.3	62.5	175	81	127	60
PHMST251	47	female	20.6	48.95	154	66.5	111	70
pHMST333	47	male	26.2	70.35	164	87	132	71
pHMST422	47	male	28.5	80.35	168	105	147	92
pHMST423	47	male	18.8	50.65	164	72	132	78
pHMST467	47	female	25.9	60.65	153.5	81	125	80
PHMST61	48	female	25.3	66.8	162.5	92	126	71
PGHST0054	48	male	22.4	63.85	169	79	124	66
PHMST114	48	male	25.8	75.1	170.5	90	161	98
PHMST125	48	male	21.2	56.95	164	84	127	80
PHMST198	48	female	26.6	68.95	161	98	128	79
PHMST204	48	male	23.9	65.95	166	84	162	106
pHMST337	48	female	22.5	57.6	160.5	72	111	72
pHMST349	48	male	24.5	70.05	169	90	147	89
pHMST357	48	male	27.3	80.65	172	97	189	111
pHMST392	48	male	27.8	73.85	163	98	144	82
pHMST395	48	female	21.8	49.75	151	72	137	88
pHMST397	48	female	19.3	55.1	169	80	108	76
pHMST399	48	female	23.1	59.9	160.5	68.5	110	69
pHMST413	48	female	24.3	66.9	166	93	101	66
pHMST441	48	female	26.6	68.15	160.5	95	120	79
pHMST485	48	female	22.4	54.1	155.5	74	128	71
pHMST486	48	female	31.02	73.1	153.5	100	123	77
PHMST228	49	female	24.2	61.2	159	91	136	89
pHMST293	49	female	22.4	50.35	149.5	69	124	73
pHMST346	49	female	20.3	49.5	156	85	108	72
pHMST356	49	female	22.7	61.7	165	81	138	86
pHMST358	49	female	23.2	56.5	156	83	113	67
pHMST442	49	female	23.1	56.3	156	85	117	79
pHMST466	49	female	19.7	53	164	66	114	63
PHMST52	50	female	23.6	59.75	159	76.5	147	113
PHMST93	50	female	23.1	58.35	159	84	136	84
PGHST0090	50	female	31.4	64.2	143	96	143	78
PHMST102	50	female	23.4	59.8	160	83	114	71
PHMST218	50	male	23.2	60.25	161	79	102	64
PHMST241	50	female	23.4	56.95	156	85	112	65
pHMST289	50	female	30.08	69.5	152	89	110	77
pHMST353	50	male	23.5	68	170	91	133	77
pHMST355	50	female	22.2	62	167	81	145	85
pHMST407	50	male	22.7	64.9	169	91	137	93
PHMST73	51	female	21.2	42.4	141.5	68	110	69
PGHST0017	51	female	17.9	45.4	159.5	69	151	84
PGHST0040	51	male	20.1	65.35	180	74.5	134	74
PGHST0051	51	male	26.8	78.3	171	100	133	86
PHMST239	51	male	22.3	62.1	167	83	134	83
pHMST310	51	female	20.8	52	158	79	110	80
pHMST323	51	female	24.96	63.1	159	81	126	62
pHMST406	51	male	23.3	70.5	174	88	137	76
pHMST424	51	female	23.2	57.3	156	80	116	76
pHMST431	51	female	21.1	54	160	78	138	93
pHMST447	51	female	25.8	58.9	151	79	135	74
pHMST450	51	male	23.3	68.05	171	87	113	76
PHMST123	52	female	25.5	68.7	164	93	127	77
PHMST189	52	female	22.3	57.2	160	82	121	70
pHMST285	52	male	24.7	63.35	160.5	86	121	78
pHMST286	52	female	17.6	43.45	157	69	107	67
pHMST303	52	female	20.4	55.85	165.5	82.5	84	52
pHMST391	52	male	27.6	81.6	172	106	134	98
pHMST398	52	female	18	40	149	66.5	122	84
pHMST394R	53	male	26.5	81.95	176	95	147	96
PHMST84	53	male	22.1	63.75	170	71	153	89
PHMST85	53	female	21.4	50.05	152	82	135	84
PHMST94	53	female	23.7	60	159	86.5	157	83
PHMST99	53	male	22.9	63.75	167	95	129	85
PGHST0001	53	female	16.8	52.85	177.5	80	161	82
PGHST0015	53	female	18.5	49.1	163.5	68	119	59
PGHST0030	53	male	24	73.8	175.5	90	129	73
PGHST0033	53	male	22.5	66.5	172.5	92	150	86
PHMST259	53	female	23.7	56.9	155	84	103	73
PHMST269	53	female	22.2	50.3	150.5	77	97	66
pGHST101	54	male	29.3	85.7	171	102	104	74
PHMST21	54	male	23.8	64.85	165.5	95	113	70
PHMST24	54	male	26.7	63.3	154	97.5	104	76
PHMST60	54	female	24.4	61.7	159	84.5	137	78
PHMST66	54	male	24.2	68.2	168	84	161	98
PHMST69	54	female	25.1	64.15	159	91	128	78
PHMST80	54	male	23.4	69.25	172	92	147	90
PHMST87	54	female	19.38	50.85	162	71	128	69
PHMST88	54	female	22.8	57.6	159	87	161	82
PGHST0019	54	female	27.5	66.2	155.5	92.5	150	75
PGHST0086	54	male	25.9	74.1	169	93.8	117	80
PHMST165	54	female	20.8	51.3	157	80	117	67
PHMST217	54	male	24.9	71.25	169	95	116	82
PHMST225	54	male	24	59.8	158	87	133	60
pHMST385	54	female	20.7	56.1	164.5	74.5	96	48
pHMST432	54	male	24.3	66.25	165	83	131	73
PHMST36	55	male	23.4	70.15	173.5	87	128	72
PGHST0023	55	male	27.5	80.4	171	93.5	118	86
PGHST0048	55	male	24.7	74.05	173.5	87	108	56
PGHST0073	55	male	27.1	65.85	156	96	134	81
PGHST0096	55	male	29.8	92.3	176.5	105	151	92
PHMST107	55	female	20.3	53.4	162	80	92	52
PHMST109	55	male	22.1	53.2	155	84.5	148	86
PHMST224	55	male	22	58.4	163	79	127	77
pHMST316	55	female	21.3	58.85	166	75	125	84
pHMST321	55	female	23.7	66.45	167.5	89	111	68
pHMST354	55	female	20.7	57	166	80	108	68
pHMST375	55	female	18.4	45	156.5	68.5	108	68
pHMST437	55	male	23.5	69.7	172	88	127	82
pHMST438	55	male	28.6	66.1	152	84	123	86
pHMST446	55	male	24.6	82.3	183	97	146	99
pHMST492	55	female	19.3	52.6	165	87	112	49
PHMST67	56	male	24.4	76.5	177	98	154	91
PHMST89	56	male	25	74	172	96	127	72
PHMST92	56	female	29.2	71.55	156.5	92	108	69
PGHST0011	56	male	26.2	73.2	167	96	143	80
PGHST0063	56	male	25	64.6	160.5	86	128	78
PHMST106	56	male	26.2	76.65	171	92.5	136	88
PHMST151	56	female	21.9	51.45	157	76	139	85
PHMST180	56	female	21	58.5	167	81	167	94.5
PHMST184	56	male	21.3	62.35	171	82	140	87
PHMST191	56	female	23.6	50.4	146	79	160	83
PHMST242	56	male	22.4	64	169	84	107	75
PHMST255	56	male	24.3	74.35	175	91	159	92
pHMST327	56	female	24.7	69.75	168.5	90	125	82
pHMST365	56	male	21.3	66.65	177	88	101	55
pHMST383	56	male	24.4	65.25	163.5	89	169	101
pHMST401	56	female	21	51.1	156	72	139	75
pHMST420	56	male	23.8	70.5	172	83	119	78
pHMST499	56	male	19.9	54.2	165	82	131	82
PHMST70	57	male	26.1	65.05	158	81.5	141	86
PHMST76	57	male	25	82	181.5	94	133	78
PHMST78	57	male	24.3	78.8	180	93	127	88
PHMST97	57	female	32.6	71.5	148.5	98.5	129	68
PGHST0004	57	female	27.7	65.45	153.5	84.5	153	84
PGHST0007	57	male	23	61.85	164.5	86.5	98	57
PGHST0009	57	male	27.3	71.7	162	95	150	86
PGHST0012	57	female	25.5	60.5	162	83	123	80
PGHST0020	57	female	25.3	57.75	151.5	85.5	118	71
PGHST0028	57	male	27	73.95	165.5	83	139	85
PGHST0037	57	female	23.6	59.55	159	86	148	55
PGHST0050	57	male	22.4	63.75	169	80.5	150	98
PGHST0055	57	female	18.9	43.35	151.5	73	129	59
PGHST0068	57	female	17.2	44	160	74.5	88	57
PGHST0069	57	male	22	60.6	164.5	83	146	84
PGHST0087	57	male	24.3	67.75	167	92.3	159	85
PGHST0091	57	female	21.2	47.75	150.5	70	132	78
PHMST0005	57	female	21.6	50	152	77	88	48
PHMST156	57	female	30.79	72.55	153.5	95	138	73
PHMST158	57	female	28	65.45	153	88	140	90
PHMST200	57	male	19.4	48.95	159	72	121	71
PHMST229	57	female	20.6	47.55	152	70	132	86
PHMST247	57	male	25.3	81.1	179	97	128	85
pHMST288	57	male	18.65	48.95	162	72	100	60
pHMST460	57	female	22.4	51.85	152	78	132	68
pHMST187R	58	female	25.7	68.35	163	90	144	84
PHMST71	58	female	21.4	48.7	151	76	113	74
PGHST0024	58	male	29.9	80.45	164	104	132	72
PGHST0027	58	female	20.2	55.4	165.5	79	128	71
PGHST0042	58	female	26.2	51.75	140.5	77	154	89
PGHST0045	58	male	23	66.2	169.5	88	125	70
PGHST0079	58	female	19	52.95	167.5	77.5	122	66
PGHST0094	58	female	38.5	90.75	153.5	106	128	75
PHMST104	58	male	23	64.1	167	91	141	77
PHMST126	58	male	29.7	86.85	171	105	115	61
PHMST132	58	female	22.02	48.9	149	77	132	76
PHMST171	58	female	23.9	56.75	154	82	95	61
PHMST181	58	male	24.2	57.35	154	83	153	90
PHMST205	58	male	23.1	62.2	164	94.5	146	84
PHMST216	58	female	24.9	65.45	162	99	123	75
PHMST250	58	male	30.4	83.75	166	103	139	93
pHMST324	58	female	26.05	61.4	153.5	94	149	93
pHMST347	58	female	24.8	67.4	165	89	136	75
pHMST380	58	male	22.7	64.9	169	85	129	71
PGHST84R	59	female	26.1	71.9	166	93.5	111	59
PHMST51	59	male	24.8	74.15	173	92	145	84
PGHST0005	59	male	22.4	61	165.5	85	139	80
PGHST0035	59	male	20.8	60.45	170.5	81	165	94
PGHST0047	59	female	21.1	55.5	162	77	145	85
PGHST0083	59	female	25.6	53.25	144.5	84	128	77
PHMST0001	59	female	24	48.05	143.5	78.5	101	60
PHMST121	59	female	21.9	61.7	168	82	113	65
PHMST150	59	female	22.2	58.1	160	84	125	75
PHMST161	59	male	26.5	80.1	174	101	134	83
PHMST186	59	male	27.1	76.4	168	97	160	92
PHMST233	59	female	23.1	60.75	162	82	128	73
PHMST248	59	male	23.4	62.15	163	89	127	79
pHMST307	59	female	19.95	51.4	160.5	74.5	110	64
pHMST329	59	female	31.8	78	156.5	104	117	66
pHMST343	59	female	22.37	49	148	76	117	76
pHMST351	59	female	24.2	62	160	82	109	65
pHMST440	59	female	29.3	67.9	152	101	111	57
PHMST77	60	female	19.2	44.55	152.5	71	116	62
PGHST0014	60	male	21.9	61.7	168.5	81	117	70
PGHST0022	60	female	26	56.15	147.5	84	148	65
PGHST0032	60	male	20.4	56.1	166	80	131	74
PGHST0059	60	female	22.4	54.15	155.5	67	125	73
PGHST0097	60	male	29	72	157.5	91	131	72
PHMST140	60	female	21.2	45.6	146.5	74	126	53
PHMST162	60	female	19.3	48.1	158	74	142	72
PHMST176	60	female	28.3	57.1	142	81	110	54
PHMST201	60	male	21.4	58.2	165	80	137	86
pHMST430	60	female	20.6	50.8	157	81	171	76
pHMST434	60	female	20.9	47.8	151	74	98	57
pHMST448	60	male	21.8	63.1	170	82	95	53
PHMST79	61	male	21	54.4	161	78	113	69
PGHST0052	61	male	23.3	60.3	161	78.5	124	68
PGHST0057	61	female	19.5	48.05	157	73	148	81
PGHST0071	61	male	23.4	64.15	165.5	89	127	72
PGHST0081	61	male	35.5	103.75	171	80	144	69
PGHST0089	61	male	23.7	67.8	169	91.3	132	76
PHMST139	61	male	26.21	77.25	171.5	95	134	65
PHMST157	61	male	23.6	63.35	164	85	126	85
PHMST197	61	female	20.6	50.75	157	80	116	62
PHMST199	61	female	19.7	49.75	159	80	138	62
PHMST226	61	male	22.6	63.8	168	91	118	74
PHMST234	61	male	26.4	67.7	160	98	146	89
PHMST236	61	male	23.4	62.25	167	90	145	54
pHMST298	61	female	30.6	76.45	158	93	123	73
pHMST439	61	male	22.5	76.35	184.5	99	138	85
PHMST42	62	female	20.6	46.15	149.5	76	94	65
PHMST72	62	male	20.4	61.1	173	84	150	80
PHMST96	62	female	21.3	46.75	148.5	72	115	66
PGHST0008	62	female	22.6	53.75	154.5	80	151	76
PGHST0038	62	male	22.1	68	175.5	85.5	113	70
PGHST0043	62	female	17.9	39.45	148.5	72	143	76
PGHST0046	62	female	21.1	50	154	74	127	70
PGHST0064	62	female	22.3	48.75	148	75	139	72
PGHST0065	62	female	25.1	52.7	145.5	84	134	90
PGHST0075	62	male	25.3	74.8	172.5	94	125	73
PGHST0092	62	male	21.28	56.55	163	88.5	140	94
PHMST112	62	female	24.9	63.85	160.5	90.5	123	73
PHMST149	62	male	24.4	68.05	167	93	133	65
PHMST163	62	female	22.8	55.7	157	83	143	82
PHMST164	62	female	22	48.95	149	82	135	77
PHMST188	62	female	23.2	51.5	149	79	136	80
PHMST210	62	male	22.2	89.6	177	90	154	89
PHMST211	62	female	31.15	65.5	145	102	166	82
PHMST238	62	male	24.3	61.45	159	81.5	122	81
PHMST243	62	female	19.1	47.15	157	74	122	56
pHMST299	62	female	23.48	52.85	150	79	154	79
pHMST348	62	male	27	74.45	166	98	116	69
PGHST0034	63	male	24	65.4	165	87	137	86
PGHST0072	63	female	25.6	65.6	160	90	124	57
PGHST0093	63	male	26.6	71.6	164	99	144	94
PGHST0098	63	male	21.67	67.9	177	81	113	67
PHMST178	63	male	23.1	62.1	164	86	141	82
PHMST192	63	male	20.4	52.3	160	81	149	79
PHMST196	63	female	18.7	40.95	148	66	122	82
PHMST203	63	female	25.5	62.85	157	91	121	62
PHMST213	63	female	21.9	49.3	150	84	139	74
PHMST232	63	male	24.1	60.9	159	91.5	127	88
pHMST330	63	female	30.6	68.4	149.5	92	139	85
pHMST338	63	female	23.3	49.65	146	85	146	72
pHMST340	63	female	21.3	53.6	158.5	74	98	59
pHMST344	63	male	26.7	77.65	170.5	97.5	142	87
PHMST57	64	male	22.2	62.05	167	86	142	76
PHMST62	64	male	19.9	56.25	168	80	138	64
PHMST81	64	female	24.7	54.75	149	98	135	87
PGHST0021	64	male	27.3	77.05	168	100	126	74
PGHST0036	64	female	20.2	47.35	153	74	118	64
PGHST0049	64	male	24.8	67.4	165	97	156	88
PGHST0066	64	female	30.9	72.25	153	97	141	88
PGHST0085	64	male	26.7	71.75	164	95	128	80
PHMST0012	64	male	29	63.1	149.5	94	127	65
PHMST135	64	female	31.5	69.2	148	106	110	79
PHMST148	64	female	20.03	50.65	159	74	142	81
PHMST153	64	female	22.3	57.8	161	82	119	72
PHMST155	64	male	20	55.2	166	81	110	73
PHMST159	64	male	23.9	62	161	86	154	86.5
PHMST208	64	female	23.2	53.25	151.5	80	123	61
pHMST308	64	female	20.07	47.3	153.5	71	113	71
pHMST315	64	male	19.6	55.95	169	72	108	65
pHMST318	64	female	21	48.45	152	72	125	72
pHMST319	64	female	22.2	57.65	161	78	114	61
pHMST325	64	female	25.5	68.65	164	94	161	79
pHMST339	64	female	23.07	57.95	158.5	79	150	86
pHMST436	64	male	21.8	60.1	166	82	143	86
pHMST464	64	female	23.6	62.65	163	85	123	77
PHMST58	65	male	22.8	61.2	164	90	158	86
PGHST0006	65	female	31.4	69.85	149	106.5	158	92
PGHST0016	65	male	23.8	61.65	161.5	90	155	83
PGHST0082	65	male	22.3	59.3	163.5	83.5	134	82
PHMST177	65	male	23.5	64.05	165	89	125	69
PHMST193	65	female	20	45.6	151	70	119	70
PHMST227	65	male	21.6	68.3	178	87	129	75
PHMST249	65	male	23.3	71.35	175	91	138	69
pHMST322	65	female	22.64	53	153	82	118	70
pHMST491	65	male	21.3	61.2	169.5	86	127	72
pGHST100	66	male	22.4	59.45	163	88	97	60
PHMST20	66	male	20.9	52.2	158.5	73	100	54
PHMST59	66	female	23.3	49.6	146	79	154	88
PHMST82	66	female	23.6	51	147	86	131	81
PGHST0077	66	male	22.8	67.45	172	84	125	71
PGHST0080	66	female	18.1	40.7	150	73	108	71
PGHST0088	66	male	25.1	65.1	161	92.3	124	73
PHMST113	66	male	18.2	47.85	162.5	72	104	63
PHMST194	66	male	23.5	65.65	167	91.5	175	97
PHMST206	66	male	24.1	65.6	165	97	134	71
pHMST435	66	male	23.3	69.7	173.5	87	121	77
pHMST493	66	female	29	63	147	91.5	121	61
PHMST64	67	male	24.2	65.05	164	91	154	79
PHMST95	67	male	23.8	64.85	165	90.5	115	67
PHMST118	67	female	21	51.8	157.5	77	143	77
PHMST122	67	female	22.5	49.35	148.5	82	127	75
PHMST152	67	male	24.9	65.35	162	90	129	78
PHMST183	67	female	16.4	47.45	160	69	95	55
PHMST202	67	male	21.3	55.8	162	81	141	72
PHMST215	67	female	25.5	53.7	145	79	128	75
PHMST230	67	male	19.96	53.05	163	74	147	72
PHMST235	67	male	27.9	73.2	162	105	126	64
PHMST237	67	female	19.5	43.25	149	73	119	78
pHMST341	67	female	35.1	74.85	146.5	111	151	96
PHMST49	68	female	23.8	58.75	157	102.5	162	92
PHMST50	68	male	23.1	60.7	162	83.5	169	84
PHMST53	68	female	21.3	48.55	151	72	138	82
PHMST54	68	male	24.7	66.3	164	93	147	81
PHMST56	68	female	20.6	44.5	147	74.5	184	84
PHMST172	68	male	22.5	54	155	84	136	75
PHMST179	68	female	21.7	50.5	152	82	150	68
PHMST219	68	female	22.2	53.3	155	86.5	132	73
PHMST254	68	male	21.7	66.55	175	85.5	142	94
pHMST311	68	female	25.9	57.3	148.5	67	121	59
pHMST314	68	female	21.6	57.55	159	87	146	71
pHMST317	68	female	25.9	54.55	145	84	140	87
pHMST320	68	male	19.06	53.15	167	81	111	68
pHMST326	68	female	26.1	63.95	156.5	98	129	74
pHMST328	68	male	22.8	64.7	168.5	87	156	83
PHMST160	69	female	23.5	59.5	159	91	167	98
PHMST175	69	female	24.8	57.3	152	88	117	64
PHMST190	69	female	26.8	64.5	150.5	92	136	75
PHMST246	70	male	21.9	64.05	171	89	163	89
pHMST313	70	male	26.18	76.45	171	89	149	90
pHMST334	70	male	24	67.8	168	85	150	79
PHMST154	71	female	22.5	48.7	147	85	170	80
PHMST16	78	male	22.53	56.95	158.5	87.5	129	65
PHMST185	81	male	21.27	46.9	148.5	74	150	96
PHMST129	83	male	23.3	64.25	166	88	129	61

## Sheet: Table S3
Relative abundance (%)	Hong Kong	Shenzhen	Zhejiang	Israel	Austria	Denmark	France	Germany	Spain	Sweden	USA	El Salvador	Fiji	Mongolia	Peru	Tanzania
k__Archaea|p__Euryarchaeota	0.120114	0.0113671	0.0311178	2.00981	1.00274	0.312908	1.7819	0.00121	1.18882	0.87984	0.109502	0.76871	0.777816	0.0311068	0.50777	6.10919
k__Bacteria|p__Actinobacteria	6.2431	0.241822	0.650873	8.12724	19.2464	0.502244	7.94521	9.4666	3.68379	7.44537	1.24463	17.7866	4.0178	23.9637	60.2575	1.89433
k__Bacteria|p__Bacteroidetes	55.8134	67.271	63.0026	28.234	6.44691	45.588	23.9374	29.8669	39.8823	35.5534	66.0442	21.9397	34.5371	28.0739	6.24715	19.4614
k__Bacteria|p__Firmicutes	31.4977	27.1993	31.9781	57.9799	66.5626	50.6664	62.4053	55.0367	52.1588	46.9331	29.4795	51.1322	51.973	41.0344	24.7251	63.6107
k__Bacteria|p__Fusobacteria	0.311842	0.546383	0.672968	0.0364302	0	0.00565472	0.0241774	0	0.33279	0.00350538	0.0136404	0.00239851	0.0456066	0.0302208	0.000707662	0.0139736
k__Bacteria|p__Proteobacteria	5.19349	3.766	3.11762	1.53714	3.61141	1.49048	2.5209	2.54451	1.6025	6.5042	2.07381	6.7524	5.92332	5.10028	5.81007	2.2594
k__Bacteria|p__Spirochaetes	0	0	0	0.0366567	0	0.00400313	0.000632951	0	0	0.00138105	0.000483333	1.39459	2.08806	0.000511909	0.0103626	3.53427
k__Bacteria|p__Verrucomicrobia	0.542266	0.0620182	0.498463	1.81011	2.99728	0.673982	1.05134	2.84716	0.819573	1.408	0.926981	0.166551	0.180313	0.932918	2.4382	0.014159
Others	0.277997	0.902108	0.0482933	0.22867	0.132615	0.756329	0.333143	0.236952	0.331379	1.27118	0.10721	0.0568595	0.457031	0.83297	0.00317039	3.10261

## Sheet: Table S4
	study	country	CRC	Fusobacterium gonidiaformans	Fusobacterium mortiferum	Fusobacterium necrophorum	Fusobacterium nucleatum	Fusobacterium periodonticum	Fusobacterium sp oral taxon 370	Fusobacterium ulcerans	Fusobacterium varium
Cohort	Yu et al., 2017	Hong Kong (China)	prevalence (%)	4.05405	24.3243	0	44.5946	9.45946	1.35135	20.2703	18.9189
Yu			relative abundance (%)	0.00486	0.153	0	0.0509	0.000932	0.0146	0.0203	0.177
	Coker et al., 2019	Hong Kong (China)	prevalence (%)	0.689655	25.5172	0.344828	23.4483	4.13793	0	13.7931	19.6552
Coker			relative abundance (%)	0.00174	0.301	0.0005	0.0302	0.000394	0	0.0537	0.131
	Feng et al., 2015	Austria	prevalence (%)	4.30107	3.22581	3.22581	23.6559	3.22581	1.07527	2.15054	1.07527
Feng			relative abundance (%)	0.00931	0.000519	0.00771	0.00976	0.000724	0.0255	0.0552	0.00044
	Zeller et al., 2014	France	prevalence (%)	5.26316	4.21053	4.21053	23.1579	6.31579	0	1.05263	3.15789
Zeller-f			relative abundance (%)	0.485	0.141	0.0836	0.0267	0.000545	0	0.000326	0.000732
		Germany	prevalence (%)	10.5263	0	0	31.5789	2.63158	0	2.63158	2.63158
Zeller-g			relative abundance (%)	0.0057	0	0	0.073	0.000283	0	0.000414	0.00565
	Vogtmann et al., 2016	USA	prevalence (%)	3.84615	3.84615	1.92308	30.7692	3.84615	0	3.84615	0
Vogtmann			relative abundance (%)	0.00659	0.016	0.000983	0.031	0.000366	0	0.00662	0

## Sheet: Table S5
Study	country	non-CRC	Fusobacterium gonidiaformans	Fusobacterium mortiferum	Fusobacterium necrophorum	Fusobacterium nucleatum	Fusobacterium periodonticum	Fusobacterium sp oral taxon 370	Fusobacterium ulcerans	Fusobacterium varium
Yu et al., 2017	Hong Kong (China)	prevalence (%)	0	11.9565	0	15.2174	2.17391	0	8.69565	11.9565
		relative abundance (%)	0	0.129	0	0.00651	5.93e-05	0	0.0395	0.00327
Coker et al., 2019	Hong Kong (China)	prevalence (%)	0	21.0526	0.75188	4.51128	1.50376	0.75188	13.5338	15.7895
		relative abundance (%)	0	0.255	0.00134	0.00475	8.01e-05	0.00227	0.0311	0.044
Feng et al., 2015	Austria	prevalence (%)	0	0	0	0	0	0	0	0
		relative abundance (%)	0	0	0	0	0	0	0	0
Zeller et al., 2014	France	prevalence (%)	1.63934	1.63934	0	1.63934	1.63934	0	1.63934	0
		relative abundance (%)	2.97e-05	0.00026	0	5.97e-05	0.000132	0	0.0236	0
	Germany	prevalence (%)	0	0	0	0	0	0	0	0
		relative abundance (%)	0	0	0	0	0	0	0	0
Vogtmann et al., 2016	USA	prevalence (%)	1.92308	3.84615	0	3.84615	7.69231	0	1.92308	1.92308
		relative abundance (%)	0.000593	0.0277	0	0.000234	0.0009	0	0.00318	1.21e-05
	(relative abundance ~ cohort + CRC_vs_non-CRC)
generalised linear model	p-value
s__Fusobacterium_gonidiaformans	0.372803
s__Fusobacterium_mortiferum	0.497382
s__Fusobacterium_necrophorum	0.334132
s__Fusobacterium_nucleatum	0.00513026
s__Fusobacterium_periodonticum	0.0857411
s__Fusobacterium_sp_oral_taxon_370	0.281814
s__Fusobacterium_ulcerans	0.604141
s__Fusobacterium_varium	0.0358623

## Sheet: Table S6
NCBI RefSeq R89 composition of fusobacterial species
accession	checkm completeness (%)	checkm contamination (%)	NCBI taxonomy
GCF_000524235.1	100	0	d__Bacteria;p__Fusobacteria;c__Fusobacteriia;o__Fusobacteriales;f__Fusobacteriaceae;g__Fusobacterium;s__
GCF_001810475.1	100	2.25	d__Bacteria;p__Fusobacteria;c__Fusobacteriia;o__Fusobacteriales;f__Fusobacteriaceae;g__Fusobacterium;s__
GCF_002243405.1	100	0	d__Bacteria;p__Fusobacteria;c__Fusobacteriia;o__Fusobacteriales;f__Fusobacteriaceae;g__Fusobacterium;s__
GCF_000524215.1	100	0.16	d__Bacteria;p__Fusobacteria;c__Fusobacteriia;o__Fusobacteriales;f__Fusobacteriaceae;g__Fusobacterium;s__
GCF_000235465.1	100	0	d__Bacteria;p__Fusobacteria;c__Fusobacteriia;o__Fusobacteriales;f__Fusobacteriaceae;g__Fusobacterium;s__
GCF_000517705.1	100	8.43	d__Bacteria;p__Fusobacteria;c__Fusobacteriia;o__Fusobacteriales;f__Fusobacteriaceae;g__Fusobacterium;s__
GCF_001815715.1	100	0	d__Bacteria;p__Fusobacteria;c__Fusobacteriia;o__Fusobacteriales;f__Fusobacteriaceae;g__Fusobacterium;s__
GCF_001810995.1	100	0	d__Bacteria;p__Fusobacteria;c__Fusobacteriia;o__Fusobacteriales;f__Fusobacteriaceae;g__Fusobacterium;s__
GCF_000524395.1	100	0	d__Bacteria;p__Fusobacteria;c__Fusobacteriia;o__Fusobacteriales;f__Fusobacteriaceae;g__Fusobacterium;s__
GCF_001813745.1	100	0	d__Bacteria;p__Fusobacteria;c__Fusobacteriia;o__Fusobacteriales;f__Fusobacteriaceae;g__Fusobacterium;s__
GCF_900015295.1	98.88	1.12	d__Bacteria;p__Fusobacteria;c__Fusobacteriia;o__Fusobacteriales;f__Fusobacteriaceae;g__Fusobacterium;s__
GCA_000433695.1	98.86	0.57	d__Bacteria;p__Fusobacteria;c__Fusobacteriia;o__Fusobacteriales;f__Fusobacteriaceae;g__Fusobacterium;s__
GCA_000437775.1	89.74	1.14	d__Bacteria;p__Fusobacteria;c__Fusobacteriia;o__Fusobacteriales;f__Fusobacteriaceae;g__Fusobacterium;s__
GCA_000438175.1	89.74	1.71	d__Bacteria;p__Fusobacteria;c__Fusobacteriia;o__Fusobacteriales;f__Fusobacteriaceae;g__Fusobacterium;s__
GCF_001546395.1	100	0	d__Bacteria;p__Fusobacteria;c__Fusobacteriia;o__Fusobacteriales;f__Fusobacteriaceae;g__Fusobacterium;s__Fusobacterium equinum
GCF_000158235.1	100	0	d__Bacteria;p__Fusobacteria;c__Fusobacteriia;o__Fusobacteriales;f__Fusobacteriaceae;g__Fusobacterium;s__Fusobacterium gonidiaformans
GCF_003019695.1	100	0	d__Bacteria;p__Fusobacteria;c__Fusobacteriia;o__Fusobacteriales;f__Fusobacteriaceae;g__Fusobacterium;s__Fusobacterium gonidiaformans
GCF_000158835.2	100	0	d__Bacteria;p__Fusobacteria;c__Fusobacteriia;o__Fusobacteriales;f__Fusobacteriaceae;g__Fusobacterium;s__Fusobacterium gonidiaformans
GCF_001455085.1	100	0	d__Bacteria;p__Fusobacteria;c__Fusobacteriia;o__Fusobacteriales;f__Fusobacteriaceae;g__Fusobacterium;s__Fusobacterium hwasookii
GCF_001455105.1	100	2.25	d__Bacteria;p__Fusobacteria;c__Fusobacteriia;o__Fusobacteriales;f__Fusobacteriaceae;g__Fusobacterium;s__Fusobacterium hwasookii
GCF_000455905.1	100	0	d__Bacteria;p__Fusobacteria;c__Fusobacteriia;o__Fusobacteriales;f__Fusobacteriaceae;g__Fusobacterium;s__Fusobacterium hwasookii
GCF_001455145.1	100	1.12	d__Bacteria;p__Fusobacteria;c__Fusobacteriia;o__Fusobacteriales;f__Fusobacteriaceae;g__Fusobacterium;s__Fusobacterium hwasookii
GCF_000292935.1	100	0	d__Bacteria;p__Fusobacteria;c__Fusobacteriia;o__Fusobacteriales;f__Fusobacteriaceae;g__Fusobacterium;s__Fusobacterium hwasookii
GCF_000455885.1	100	0	d__Bacteria;p__Fusobacteria;c__Fusobacteriia;o__Fusobacteriales;f__Fusobacteriaceae;g__Fusobacterium;s__Fusobacterium hwasookii
GCF_000455925.1	98.88	1.12	d__Bacteria;p__Fusobacteria;c__Fusobacteriia;o__Fusobacteriales;f__Fusobacteriaceae;g__Fusobacterium;s__Fusobacterium hwasookii
GCF_000455865.1	98.88	0.37	d__Bacteria;p__Fusobacteria;c__Fusobacteriia;o__Fusobacteriales;f__Fusobacteriaceae;g__Fusobacterium;s__Fusobacterium hwasookii
GCF_900095705.1	98.88	1.12	d__Bacteria;p__Fusobacteria;c__Fusobacteriia;o__Fusobacteriales;f__Fusobacteriaceae;g__Fusobacterium;s__Fusobacterium massiliense
GCF_003019315.1	98.88	1.12	d__Bacteria;p__Fusobacteria;c__Fusobacteriia;o__Fusobacteriales;f__Fusobacteriaceae;g__Fusobacterium;s__Fusobacterium mortiferum
GCF_000158195.2	98.88	1.12	d__Bacteria;p__Fusobacteria;c__Fusobacteriia;o__Fusobacteriales;f__Fusobacteriaceae;g__Fusobacterium;s__Fusobacterium mortiferum
GCF_003014445.1	99.16	0.63	d__Bacteria;p__Fusobacteria;c__Fusobacteriia;o__Fusobacteriales;f__Fusobacteriaceae;g__Fusobacterium;s__Fusobacterium naviforme
GCF_001597335.1	100	0	d__Bacteria;p__Fusobacteria;c__Fusobacteriia;o__Fusobacteriales;f__Fusobacteriaceae;g__Fusobacterium;s__Fusobacterium necrophorum
GCF_001597525.1	100	0	d__Bacteria;p__Fusobacteria;c__Fusobacteriia;o__Fusobacteriales;f__Fusobacteriaceae;g__Fusobacterium;s__Fusobacterium necrophorum
GCF_001597315.1	100	0	d__Bacteria;p__Fusobacteria;c__Fusobacteriia;o__Fusobacteriales;f__Fusobacteriaceae;g__Fusobacterium;s__Fusobacterium necrophorum
GCF_000691685.1	100	0.56	d__Bacteria;p__Fusobacteria;c__Fusobacteriia;o__Fusobacteriales;f__Fusobacteriaceae;g__Fusobacterium;s__Fusobacterium necrophorum
GCF_001597385.1	100	0	d__Bacteria;p__Fusobacteria;c__Fusobacteriia;o__Fusobacteriales;f__Fusobacteriaceae;g__Fusobacterium;s__Fusobacterium necrophorum
GCF_001597445.1	100	0	d__Bacteria;p__Fusobacteria;c__Fusobacteriia;o__Fusobacteriales;f__Fusobacteriaceae;g__Fusobacterium;s__Fusobacterium necrophorum
GCF_003019715.1	100	0	d__Bacteria;p__Fusobacteria;c__Fusobacteriia;o__Fusobacteriales;f__Fusobacteriaceae;g__Fusobacterium;s__Fusobacterium necrophorum
GCF_001596485.1	100	0	d__Bacteria;p__Fusobacteria;c__Fusobacteriia;o__Fusobacteriales;f__Fusobacteriaceae;g__Fusobacterium;s__Fusobacterium necrophorum
GCF_001597465.1	100	0	d__Bacteria;p__Fusobacteria;c__Fusobacteriia;o__Fusobacteriales;f__Fusobacteriaceae;g__Fusobacterium;s__Fusobacterium necrophorum
GCF_001597485.1	100	0	d__Bacteria;p__Fusobacteria;c__Fusobacteriia;o__Fusobacteriales;f__Fusobacteriaceae;g__Fusobacterium;s__Fusobacterium necrophorum
GCF_002761995.1	100	0	d__Bacteria;p__Fusobacteria;c__Fusobacteriia;o__Fusobacteriales;f__Fusobacteriaceae;g__Fusobacterium;s__Fusobacterium necrophorum
GCF_001597545.1	100	0	d__Bacteria;p__Fusobacteria;c__Fusobacteriia;o__Fusobacteriales;f__Fusobacteriaceae;g__Fusobacterium;s__Fusobacterium necrophorum
GCF_001596495.1	100	0	d__Bacteria;p__Fusobacteria;c__Fusobacteriia;o__Fusobacteriales;f__Fusobacteriaceae;g__Fusobacterium;s__Fusobacterium necrophorum
GCF_000691705.1	100	0	d__Bacteria;p__Fusobacteria;c__Fusobacteriia;o__Fusobacteriales;f__Fusobacteriaceae;g__Fusobacterium;s__Fusobacterium necrophorum
GCF_000600355.1	100	0	d__Bacteria;p__Fusobacteria;c__Fusobacteriia;o__Fusobacteriales;f__Fusobacteriaceae;g__Fusobacterium;s__Fusobacterium necrophorum
GCF_001597395.1	100	0	d__Bacteria;p__Fusobacteria;c__Fusobacteriia;o__Fusobacteriales;f__Fusobacteriaceae;g__Fusobacterium;s__Fusobacterium necrophorum
GCF_000691725.1	100	1.12	d__Bacteria;p__Fusobacteria;c__Fusobacteriia;o__Fusobacteriales;f__Fusobacteriaceae;g__Fusobacterium;s__Fusobacterium necrophorum
GCF_000691745.1	100	0.56	d__Bacteria;p__Fusobacteria;c__Fusobacteriia;o__Fusobacteriales;f__Fusobacteriaceae;g__Fusobacterium;s__Fusobacterium necrophorum
GCF_900104395.1	100	0	d__Bacteria;p__Fusobacteria;c__Fusobacteriia;o__Fusobacteriales;f__Fusobacteriaceae;g__Fusobacterium;s__Fusobacterium necrophorum
GCF_001597325.1	100	0	d__Bacteria;p__Fusobacteria;c__Fusobacteriia;o__Fusobacteriales;f__Fusobacteriaceae;g__Fusobacterium;s__Fusobacterium necrophorum
GCF_000691645.1	100	1.12	d__Bacteria;p__Fusobacteria;c__Fusobacteriia;o__Fusobacteriales;f__Fusobacteriaceae;g__Fusobacterium;s__Fusobacterium necrophorum
GCF_001597565.1	100	0	d__Bacteria;p__Fusobacteria;c__Fusobacteriia;o__Fusobacteriales;f__Fusobacteriaceae;g__Fusobacterium;s__Fusobacterium necrophorum
GCF_001597575.1	100	0	d__Bacteria;p__Fusobacteria;c__Fusobacteriia;o__Fusobacteriales;f__Fusobacteriaceae;g__Fusobacterium;s__Fusobacterium necrophorum
GCA_900451075.1	100	8.99	d__Bacteria;p__Fusobacteria;c__Fusobacteriia;o__Fusobacteriales;f__Fusobacteriaceae;g__Fusobacterium;s__Fusobacterium necrophorum
GCF_000622045.1	100	0	d__Bacteria;p__Fusobacteria;c__Fusobacteriia;o__Fusobacteriales;f__Fusobacteriaceae;g__Fusobacterium;s__Fusobacterium necrophorum
GCF_000262225.1	100	0	d__Bacteria;p__Fusobacteria;c__Fusobacteriia;o__Fusobacteriales;f__Fusobacteriaceae;g__Fusobacterium;s__Fusobacterium necrophorum
GCF_001597475.1	100	0	d__Bacteria;p__Fusobacteria;c__Fusobacteriia;o__Fusobacteriales;f__Fusobacteriaceae;g__Fusobacterium;s__Fusobacterium necrophorum
GCF_001597405.1	100	0	d__Bacteria;p__Fusobacteria;c__Fusobacteriia;o__Fusobacteriales;f__Fusobacteriaceae;g__Fusobacterium;s__Fusobacterium necrophorum
GCF_002762025.1	100	0	d__Bacteria;p__Fusobacteria;c__Fusobacteriia;o__Fusobacteriales;f__Fusobacteriaceae;g__Fusobacterium;s__Fusobacterium necrophorum
GCF_000292975.1	100	0	d__Bacteria;p__Fusobacteria;c__Fusobacteriia;o__Fusobacteriales;f__Fusobacteriaceae;g__Fusobacterium;s__Fusobacterium necrophorum
GCF_001596475.1	100	0	d__Bacteria;p__Fusobacteria;c__Fusobacteriia;o__Fusobacteriales;f__Fusobacteriaceae;g__Fusobacterium;s__Fusobacterium necrophorum
GCF_001597305.1	100	0	d__Bacteria;p__Fusobacteria;c__Fusobacteriia;o__Fusobacteriales;f__Fusobacteriaceae;g__Fusobacterium;s__Fusobacterium necrophorum
GCF_000691665.1	99.44	0.37	d__Bacteria;p__Fusobacteria;c__Fusobacteriia;o__Fusobacteriales;f__Fusobacteriaceae;g__Fusobacterium;s__Fusobacterium necrophorum
GCA_000814775.1	97.47	0	d__Bacteria;p__Fusobacteria;c__Fusobacteriia;o__Fusobacteriales;f__Fusobacteriaceae;g__Fusobacterium;s__Fusobacterium necrophorum
GCA_000158295.2	92.7	0	d__Bacteria;p__Fusobacteria;c__Fusobacteriia;o__Fusobacteriales;f__Fusobacteriaceae;g__Fusobacterium;s__Fusobacterium necrophorum
GCA_000242215.1	91.85	0	d__Bacteria;p__Fusobacteria;c__Fusobacteriia;o__Fusobacteriales;f__Fusobacteriaceae;g__Fusobacterium;s__Fusobacterium necrophorum
GCF_002591645.1	100	0	d__Bacteria;p__Fusobacteria;c__Fusobacteriia;o__Fusobacteriales;f__Fusobacteriaceae;g__Fusobacterium;s__Fusobacterium nucleatum
GCF_000455945.1	100	0	d__Bacteria;p__Fusobacteria;c__Fusobacteriia;o__Fusobacteriales;f__Fusobacteriaceae;g__Fusobacterium;s__Fusobacterium nucleatum
GCF_002591475.1	100	0	d__Bacteria;p__Fusobacteria;c__Fusobacteriia;o__Fusobacteriales;f__Fusobacteriaceae;g__Fusobacterium;s__Fusobacterium nucleatum
GCF_002591555.1	100	0	d__Bacteria;p__Fusobacteria;c__Fusobacteriia;o__Fusobacteriales;f__Fusobacteriaceae;g__Fusobacterium;s__Fusobacterium nucleatum
GCF_001457555.1	100	0	d__Bacteria;p__Fusobacteria;c__Fusobacteriia;o__Fusobacteriales;f__Fusobacteriaceae;g__Fusobacterium;s__Fusobacterium nucleatum
GCF_000234075.2	100	0	d__Bacteria;p__Fusobacteria;c__Fusobacteriia;o__Fusobacteriales;f__Fusobacteriaceae;g__Fusobacterium;s__Fusobacterium nucleatum
GCF_001296145.1	100	0	d__Bacteria;p__Fusobacteria;c__Fusobacteriia;o__Fusobacteriales;f__Fusobacteriaceae;g__Fusobacterium;s__Fusobacterium nucleatum
GCF_001546435.1	100	1.7	d__Bacteria;p__Fusobacteria;c__Fusobacteriia;o__Fusobacteriales;f__Fusobacteriaceae;g__Fusobacterium;s__Fusobacterium nucleatum
GCF_000163915.2	100	0	d__Bacteria;p__Fusobacteria;c__Fusobacteriia;o__Fusobacteriales;f__Fusobacteriaceae;g__Fusobacterium;s__Fusobacterium nucleatum
GCF_000479225.1	100	0	d__Bacteria;p__Fusobacteria;c__Fusobacteriia;o__Fusobacteriales;f__Fusobacteriaceae;g__Fusobacterium;s__Fusobacterium nucleatum
GCF_001296085.1	100	0	d__Bacteria;p__Fusobacteria;c__Fusobacteriia;o__Fusobacteriales;f__Fusobacteriaceae;g__Fusobacterium;s__Fusobacterium nucleatum
GCF_002211625.1	100	0	d__Bacteria;p__Fusobacteria;c__Fusobacteriia;o__Fusobacteriales;f__Fusobacteriaceae;g__Fusobacterium;s__Fusobacterium nucleatum
GCF_000455985.1	100	0	d__Bacteria;p__Fusobacteria;c__Fusobacteriia;o__Fusobacteriales;f__Fusobacteriaceae;g__Fusobacterium;s__Fusobacterium nucleatum
GCF_000479185.1	100	0	d__Bacteria;p__Fusobacteria;c__Fusobacteriia;o__Fusobacteriales;f__Fusobacteriaceae;g__Fusobacterium;s__Fusobacterium nucleatum
GCF_000218645.2	100	0	d__Bacteria;p__Fusobacteria;c__Fusobacteriia;o__Fusobacteriales;f__Fusobacteriaceae;g__Fusobacterium;s__Fusobacterium nucleatum
GCF_000479245.1	100	0	d__Bacteria;p__Fusobacteria;c__Fusobacteriia;o__Fusobacteriales;f__Fusobacteriaceae;g__Fusobacterium;s__Fusobacterium nucleatum
GCA_002762005.1	100	0	d__Bacteria;p__Fusobacteria;c__Fusobacteriia;o__Fusobacteriales;f__Fusobacteriaceae;g__Fusobacterium;s__Fusobacterium nucleatum
GCF_000273625.1	100	0	d__Bacteria;p__Fusobacteria;c__Fusobacteriia;o__Fusobacteriales;f__Fusobacteriaceae;g__Fusobacterium;s__Fusobacterium nucleatum
GCA_001296125.1	100	0	d__Bacteria;p__Fusobacteria;c__Fusobacteriia;o__Fusobacteriales;f__Fusobacteriaceae;g__Fusobacterium;s__Fusobacterium nucleatum
GCF_002591465.1	100	1.12	d__Bacteria;p__Fusobacteria;c__Fusobacteriia;o__Fusobacteriales;f__Fusobacteriaceae;g__Fusobacterium;s__Fusobacterium nucleatum
GCF_003226385.1	100	0	d__Bacteria;p__Fusobacteria;c__Fusobacteriia;o__Fusobacteriales;f__Fusobacteriaceae;g__Fusobacterium;s__Fusobacterium nucleatum
GCF_002211605.1	100	0	d__Bacteria;p__Fusobacteria;c__Fusobacteriia;o__Fusobacteriales;f__Fusobacteriaceae;g__Fusobacterium;s__Fusobacterium nucleatum
GCA_002762015.1	100	0	d__Bacteria;p__Fusobacteria;c__Fusobacteriia;o__Fusobacteriales;f__Fusobacteriaceae;g__Fusobacterium;s__Fusobacterium nucleatum
GCA_002573475.1	100	0	d__Bacteria;p__Fusobacteria;c__Fusobacteriia;o__Fusobacteriales;f__Fusobacteriaceae;g__Fusobacterium;s__Fusobacterium nucleatum
GCA_001455125.1	100	0	d__Bacteria;p__Fusobacteria;c__Fusobacteriia;o__Fusobacteriales;f__Fusobacteriaceae;g__Fusobacterium;s__Fusobacterium nucleatum
GCF_000242975.1	100	0	d__Bacteria;p__Fusobacteria;c__Fusobacteriia;o__Fusobacteriales;f__Fusobacteriaceae;g__Fusobacterium;s__Fusobacterium nucleatum
GCF_002591505.1	100	1.12	d__Bacteria;p__Fusobacteria;c__Fusobacteriia;o__Fusobacteriales;f__Fusobacteriaceae;g__Fusobacterium;s__Fusobacterium nucleatum
GCF_000162355.2	100	0	d__Bacteria;p__Fusobacteria;c__Fusobacteriia;o__Fusobacteriales;f__Fusobacteriaceae;g__Fusobacterium;s__Fusobacterium nucleatum
GCF_002591545.1	100	0	d__Bacteria;p__Fusobacteria;c__Fusobacteriia;o__Fusobacteriales;f__Fusobacteriaceae;g__Fusobacterium;s__Fusobacterium nucleatum
GCF_000158275.2	100	0	d__Bacteria;p__Fusobacteria;c__Fusobacteriia;o__Fusobacteriales;f__Fusobacteriaceae;g__Fusobacterium;s__Fusobacterium nucleatum
GCF_001854465.1	100	0.56	d__Bacteria;p__Fusobacteria;c__Fusobacteriia;o__Fusobacteriales;f__Fusobacteriaceae;g__Fusobacterium;s__Fusobacterium nucleatum
GCF_002749995.1	100	0	d__Bacteria;p__Fusobacteria;c__Fusobacteriia;o__Fusobacteriales;f__Fusobacteriaceae;g__Fusobacterium;s__Fusobacterium nucleatum
GCF_000273605.1	100	0	d__Bacteria;p__Fusobacteria;c__Fusobacteriia;o__Fusobacteriales;f__Fusobacteriaceae;g__Fusobacterium;s__Fusobacterium nucleatum
GCF_001296165.1	100	0	d__Bacteria;p__Fusobacteria;c__Fusobacteriia;o__Fusobacteriales;f__Fusobacteriaceae;g__Fusobacterium;s__Fusobacterium nucleatum
GCA_001296185.1	100	0	d__Bacteria;p__Fusobacteria;c__Fusobacteriia;o__Fusobacteriales;f__Fusobacteriaceae;g__Fusobacterium;s__Fusobacterium nucleatum
GCF_002417615.1	100	0.56	d__Bacteria;p__Fusobacteria;c__Fusobacteriia;o__Fusobacteriales;f__Fusobacteriaceae;g__Fusobacterium;s__Fusobacterium nucleatum
GCF_000493815.1	100	0	d__Bacteria;p__Fusobacteria;c__Fusobacteriia;o__Fusobacteriales;f__Fusobacteriaceae;g__Fusobacterium;s__Fusobacterium nucleatum
GCF_000178895.1	100	0.16	d__Bacteria;p__Fusobacteria;c__Fusobacteriia;o__Fusobacteriales;f__Fusobacteriaceae;g__Fusobacterium;s__Fusobacterium nucleatum
GCF_002591585.1	100	1.12	d__Bacteria;p__Fusobacteria;c__Fusobacteriia;o__Fusobacteriales;f__Fusobacteriaceae;g__Fusobacterium;s__Fusobacterium nucleatum
GCF_002573625.1	100	1.28	d__Bacteria;p__Fusobacteria;c__Fusobacteriia;o__Fusobacteriales;f__Fusobacteriaceae;g__Fusobacterium;s__Fusobacterium nucleatum
GCF_000347315.1	100	0	d__Bacteria;p__Fusobacteria;c__Fusobacteriia;o__Fusobacteriales;f__Fusobacteriaceae;g__Fusobacterium;s__Fusobacterium nucleatum
GCF_002202115.1	100	0	d__Bacteria;p__Fusobacteria;c__Fusobacteriia;o__Fusobacteriales;f__Fusobacteriaceae;g__Fusobacterium;s__Fusobacterium nucleatum
GCF_000479285.1	100	0	d__Bacteria;p__Fusobacteria;c__Fusobacteriia;o__Fusobacteriales;f__Fusobacteriaceae;g__Fusobacterium;s__Fusobacterium nucleatum
GCF_001433955.1	100	0	d__Bacteria;p__Fusobacteria;c__Fusobacteriia;o__Fusobacteriales;f__Fusobacteriaceae;g__Fusobacterium;s__Fusobacterium nucleatum
GCF_003019295.1	100	0	d__Bacteria;p__Fusobacteria;c__Fusobacteriia;o__Fusobacteriales;f__Fusobacteriaceae;g__Fusobacterium;s__Fusobacterium nucleatum
GCF_000218655.1	100	0	d__Bacteria;p__Fusobacteria;c__Fusobacteriia;o__Fusobacteriales;f__Fusobacteriaceae;g__Fusobacterium;s__Fusobacterium nucleatum
GCF_000162235.2	100	0	d__Bacteria;p__Fusobacteria;c__Fusobacteriia;o__Fusobacteriales;f__Fusobacteriaceae;g__Fusobacterium;s__Fusobacterium nucleatum
GCA_002884895.1	100	0	d__Bacteria;p__Fusobacteria;c__Fusobacteriia;o__Fusobacteriales;f__Fusobacteriaceae;g__Fusobacterium;s__Fusobacterium nucleatum
GCF_000523555.1	100	0	d__Bacteria;p__Fusobacteria;c__Fusobacteriia;o__Fusobacteriales;f__Fusobacteriaceae;g__Fusobacterium;s__Fusobacterium nucleatum
GCA_002211645.1	100	0	d__Bacteria;p__Fusobacteria;c__Fusobacteriia;o__Fusobacteriales;f__Fusobacteriaceae;g__Fusobacterium;s__Fusobacterium nucleatum
GCF_003019785.1	100	0.16	d__Bacteria;p__Fusobacteria;c__Fusobacteriia;o__Fusobacteriales;f__Fusobacteriaceae;g__Fusobacterium;s__Fusobacterium nucleatum
GCF_002764055.1	100	0	d__Bacteria;p__Fusobacteria;c__Fusobacteriia;o__Fusobacteriales;f__Fusobacteriaceae;g__Fusobacterium;s__Fusobacterium nucleatum
GCF_001510735.1	100	1.12	d__Bacteria;p__Fusobacteria;c__Fusobacteriia;o__Fusobacteriales;f__Fusobacteriaceae;g__Fusobacterium;s__Fusobacterium nucleatum
GCF_000158255.2	100	0	d__Bacteria;p__Fusobacteria;c__Fusobacteriia;o__Fusobacteriales;f__Fusobacteriaceae;g__Fusobacterium;s__Fusobacterium nucleatum
GCF_000400875.1	100	0	d__Bacteria;p__Fusobacteria;c__Fusobacteriia;o__Fusobacteriales;f__Fusobacteriaceae;g__Fusobacterium;s__Fusobacterium nucleatum
GCF_002591515.1	100	0	d__Bacteria;p__Fusobacteria;c__Fusobacteriia;o__Fusobacteriales;f__Fusobacteriaceae;g__Fusobacterium;s__Fusobacterium nucleatum
GCF_002204435.1	100	0	d__Bacteria;p__Fusobacteria;c__Fusobacteriia;o__Fusobacteriales;f__Fusobacteriaceae;g__Fusobacterium;s__Fusobacterium nucleatum
GCF_000007325.1	99.95	0	d__Bacteria;p__Fusobacteria;c__Fusobacteriia;o__Fusobacteriales;f__Fusobacteriaceae;g__Fusobacterium;s__Fusobacterium nucleatum
GCF_000455965.1	98.88	0.37	d__Bacteria;p__Fusobacteria;c__Fusobacteriia;o__Fusobacteriales;f__Fusobacteriaceae;g__Fusobacterium;s__Fusobacterium nucleatum
GCF_000153625.3	98.88	0	d__Bacteria;p__Fusobacteria;c__Fusobacteriia;o__Fusobacteriales;f__Fusobacteriaceae;g__Fusobacterium;s__Fusobacterium nucleatum
GCF_000479265.1	98.88	0.72	d__Bacteria;p__Fusobacteria;c__Fusobacteriia;o__Fusobacteriales;f__Fusobacteriaceae;g__Fusobacterium;s__Fusobacterium nucleatum
GCF_000479205.1	98.88	2.25	d__Bacteria;p__Fusobacteria;c__Fusobacteriia;o__Fusobacteriales;f__Fusobacteriaceae;g__Fusobacterium;s__Fusobacterium nucleatum
GCF_000279975.1	98.72	0	d__Bacteria;p__Fusobacteria;c__Fusobacteriia;o__Fusobacteriales;f__Fusobacteriaceae;g__Fusobacterium;s__Fusobacterium nucleatum
GCF_000158535.2	96.59	0	d__Bacteria;p__Fusobacteria;c__Fusobacteriia;o__Fusobacteriales;f__Fusobacteriaceae;g__Fusobacterium;s__Fusobacterium nucleatum
GCA_000182945.1	94.92	1.12	d__Bacteria;p__Fusobacteria;c__Fusobacteriia;o__Fusobacteriales;f__Fusobacteriaceae;g__Fusobacterium;s__Fusobacterium nucleatum
GCF_000622245.1	100	1.12	d__Bacteria;p__Fusobacteria;c__Fusobacteriia;o__Fusobacteriales;f__Fusobacteriaceae;g__Fusobacterium;s__Fusobacterium perfoetens
GCF_000160475.1	100	0	d__Bacteria;p__Fusobacteria;c__Fusobacteriia;o__Fusobacteriales;f__Fusobacteriaceae;g__Fusobacterium;s__Fusobacterium periodonticum
GCF_002763915.1	100	1.69	d__Bacteria;p__Fusobacteria;c__Fusobacteriia;o__Fusobacteriales;f__Fusobacteriaceae;g__Fusobacterium;s__Fusobacterium periodonticum
GCF_002761935.1	100	0.56	d__Bacteria;p__Fusobacteria;c__Fusobacteriia;o__Fusobacteriales;f__Fusobacteriaceae;g__Fusobacterium;s__Fusobacterium periodonticum
GCF_000163935.1	100	0	d__Bacteria;p__Fusobacteria;c__Fusobacteriia;o__Fusobacteriales;f__Fusobacteriaceae;g__Fusobacterium;s__Fusobacterium periodonticum
GCF_003019755.1	100	0.56	d__Bacteria;p__Fusobacteria;c__Fusobacteriia;o__Fusobacteriales;f__Fusobacteriaceae;g__Fusobacterium;s__Fusobacterium periodonticum
GCF_002763625.1	100	0.56	d__Bacteria;p__Fusobacteria;c__Fusobacteriia;o__Fusobacteriales;f__Fusobacteriaceae;g__Fusobacterium;s__Fusobacterium periodonticum
GCF_002763815.1	100	0.72	d__Bacteria;p__Fusobacteria;c__Fusobacteriia;o__Fusobacteriales;f__Fusobacteriaceae;g__Fusobacterium;s__Fusobacterium periodonticum
GCF_002761955.1	100	0.56	d__Bacteria;p__Fusobacteria;c__Fusobacteriia;o__Fusobacteriales;f__Fusobacteriaceae;g__Fusobacterium;s__Fusobacterium periodonticum
GCF_002763775.1	100	0.16	d__Bacteria;p__Fusobacteria;c__Fusobacteriia;o__Fusobacteriales;f__Fusobacteriaceae;g__Fusobacterium;s__Fusobacterium periodonticum
GCF_002763695.1	100	1.69	d__Bacteria;p__Fusobacteria;c__Fusobacteriia;o__Fusobacteriales;f__Fusobacteriaceae;g__Fusobacterium;s__Fusobacterium periodonticum
GCF_002761915.1	100	1.12	d__Bacteria;p__Fusobacteria;c__Fusobacteriia;o__Fusobacteriales;f__Fusobacteriaceae;g__Fusobacterium;s__Fusobacterium periodonticum
GCF_000158215.3	100	0.56	d__Bacteria;p__Fusobacteria;c__Fusobacteriia;o__Fusobacteriales;f__Fusobacteriaceae;g__Fusobacterium;s__Fusobacterium periodonticum
GCF_002763925.1	100	0.72	d__Bacteria;p__Fusobacteria;c__Fusobacteriia;o__Fusobacteriales;f__Fusobacteriaceae;g__Fusobacterium;s__Fusobacterium periodonticum
GCF_002763735.1	100	0	d__Bacteria;p__Fusobacteria;c__Fusobacteriia;o__Fusobacteriales;f__Fusobacteriaceae;g__Fusobacterium;s__Fusobacterium periodonticum
GCF_002763595.1	100	0.56	d__Bacteria;p__Fusobacteria;c__Fusobacteriia;o__Fusobacteriales;f__Fusobacteriaceae;g__Fusobacterium;s__Fusobacterium periodonticum
GCF_002763875.1	99.44	0.56	d__Bacteria;p__Fusobacteria;c__Fusobacteriia;o__Fusobacteriales;f__Fusobacteriaceae;g__Fusobacterium;s__Fusobacterium periodonticum
GCF_000297655.1	95.51	0	d__Bacteria;p__Fusobacteria;c__Fusobacteriia;o__Fusobacteriales;f__Fusobacteriaceae;g__Fusobacterium;s__Fusobacterium periodonticum
GCF_000381725.1	98.88	0	d__Bacteria;p__Fusobacteria;c__Fusobacteriia;o__Fusobacteriales;f__Fusobacteriaceae;g__Fusobacterium;s__Fusobacterium russii
GCF_900478315.1	100	2.25	d__Bacteria;p__Fusobacteria;c__Fusobacteriia;o__Fusobacteriales;f__Fusobacteriaceae;g__Fusobacterium;s__Fusobacterium ulcerans
GCF_000158315.2	100	2.25	d__Bacteria;p__Fusobacteria;c__Fusobacteriia;o__Fusobacteriales;f__Fusobacteriaceae;g__Fusobacterium;s__Fusobacterium ulcerans
GCF_003019675.1	100	2.25	d__Bacteria;p__Fusobacteria;c__Fusobacteriia;o__Fusobacteriales;f__Fusobacteriaceae;g__Fusobacterium;s__Fusobacterium ulcerans
GCF_000242995.2	100	2.25	d__Bacteria;p__Fusobacteria;c__Fusobacteriia;o__Fusobacteriales;f__Fusobacteriaceae;g__Fusobacterium;s__Fusobacterium ulcerans
GCF_002356455.1	100	2.25	d__Bacteria;p__Fusobacteria;c__Fusobacteriia;o__Fusobacteriales;f__Fusobacteriaceae;g__Fusobacterium;s__Fusobacterium varium
GCF_003019655.1	100	1.12	d__Bacteria;p__Fusobacteria;c__Fusobacteriia;o__Fusobacteriales;f__Fusobacteriaceae;g__Fusobacterium;s__Fusobacterium varium
GCF_000159915.2	98.83	1.12	d__Bacteria;p__Fusobacteria;c__Fusobacteriia;o__Fusobacteriales;f__Fusobacteriaceae;g__Fusobacterium;s__Fusobacterium varium

## Sheet: Table S7
sort	MAG ID	data source	CRC status	country	CheckM completeness (%)	CheckM contamination (%)	GTDB taxonomy	NCBI taxonomy	genome size (bp)	%GC	Predicted proteins	number of contigs	% mapped reads	dRep cluster ID	FadA homologues (copies)	Fap2 homologues (copies)
1	GCF_000524235.1	RefSeq R89	unsure	none	100	0	d__Bacteria;p__Fusobacteriota;c__Fusobacteriia;o__Fusobacteriales;f__Fusobacteriaceae;g__Fusobacterium;s__Fusobacterium polymorphum	d__Bacteria;p__Fusobacteria;c__Fusobacteriia;o__Fusobacteriales;f__Fusobacteriaceae;g__Fusobacterium;s__	2497272	26.7725	2473	87	NA	23_65	1	1
2	GCF_002591645.1	RefSeq R89	unsure	South Korea: Gwangju	100	0	d__Bacteria;p__Fusobacteriota;c__Fusobacteriia;o__Fusobacteriales;f__Fusobacteriaceae;g__Fusobacterium;s__Fusobacterium polymorphum	d__Bacteria;p__Fusobacteria;c__Fusobacteriia;o__Fusobacteriales;f__Fusobacteriaceae;g__Fusobacterium;s__Fusobacterium nucleatum	2577563	27.0095	2516	43	NA	23_53	1	1
3	GCF_000160475.1	RefSeq R89	unsure	USA	100	0	d__Bacteria;p__Fusobacteriota;c__Fusobacteriia;o__Fusobacteriales;f__Fusobacteriaceae;g__Fusobacterium;s__Fusobacterium periodonticum	d__Bacteria;p__Fusobacteria;c__Fusobacteriia;o__Fusobacteriales;f__Fusobacteriaceae;g__Fusobacterium;s__Fusobacterium periodonticum	2615003	27.3743	2493	143	NA	21_61	1	0
4	GCF_002356455.1	RefSeq R89	unsure	Japan	100	2.25	d__Bacteria;p__Fusobacteriota;c__Fusobacteriia;o__Fusobacteriales;f__Fusobacteriaceae;g__Fusobacterium_A;s__Fusobacterium_A varium_A	d__Bacteria;p__Fusobacteria;c__Fusobacteriia;o__Fusobacteriales;f__Fusobacteriaceae;g__Fusobacterium;s__Fusobacterium varium	4122841	29.0907	3749	3	NA	12_1	6	0
5	GCF_000455945.1	RefSeq R89	unsure	South Korea	100	0	d__Bacteria;p__Fusobacteriota;c__Fusobacteriia;o__Fusobacteriales;f__Fusobacteriaceae;g__Fusobacterium;s__Fusobacterium nucleatum	d__Bacteria;p__Fusobacteria;c__Fusobacteriia;o__Fusobacteriales;f__Fusobacteriaceae;g__Fusobacterium;s__Fusobacterium nucleatum	2162122	26.9532	2102	83	NA	23_40	1	1
6	GCF_001597335.1	RefSeq R89	unsure	Denmark	100	0	d__Bacteria;p__Fusobacteriota;c__Fusobacteriia;o__Fusobacteriales;f__Fusobacteriaceae;g__Fusobacterium_C;s__Fusobacterium_C necrophorum	d__Bacteria;p__Fusobacteria;c__Fusobacteriia;o__Fusobacteriales;f__Fusobacteriaceae;g__Fusobacterium;s__Fusobacterium necrophorum	2137371	35.2265	2016	32	NA	5_2	0	0
7	GCF_001455085.1	RefSeq R89	unsure	South Korea: Gwangju	100	0	d__Bacteria;p__Fusobacteriota;c__Fusobacteriia;o__Fusobacteriales;f__Fusobacteriaceae;g__Fusobacterium;s__Fusobacterium hwasookii	d__Bacteria;p__Fusobacteria;c__Fusobacteriia;o__Fusobacteriales;f__Fusobacteriaceae;g__Fusobacterium;s__Fusobacterium hwasookii	2430523	27.2405	2351	2	NA	23_45	1	0
8	GCF_002591475.1	RefSeq R89	unsure	South Korea: Gwangju	100	0	d__Bacteria;p__Fusobacteriota;c__Fusobacteriia;o__Fusobacteriales;f__Fusobacteriaceae;g__Fusobacterium;s__Fusobacterium polymorphum	d__Bacteria;p__Fusobacteria;c__Fusobacteriia;o__Fusobacteriales;f__Fusobacteriaceae;g__Fusobacterium;s__Fusobacterium nucleatum	2571390	26.9108	2548	58	NA	23_60	1	0
9	GCF_001597525.1	RefSeq R89	unsure	Denmark	100	0	d__Bacteria;p__Fusobacteriota;c__Fusobacteriia;o__Fusobacteriales;f__Fusobacteriaceae;g__Fusobacterium_C;s__Fusobacterium_C necrophorum	d__Bacteria;p__Fusobacteria;c__Fusobacteriia;o__Fusobacteriales;f__Fusobacteriaceae;g__Fusobacterium;s__Fusobacterium necrophorum	2112695	35.1047	2046	45	NA	5_3	0	0
10	GCF_000455965.1	RefSeq R89	unsure	South Korea: Gwangju	98.88	0.37	d__Bacteria;p__Fusobacteriota;c__Fusobacteriia;o__Fusobacteriales;f__Fusobacteriaceae;g__Fusobacterium;s__Fusobacterium vincentii	d__Bacteria;p__Fusobacteria;c__Fusobacteriia;o__Fusobacteriales;f__Fusobacteriaceae;g__Fusobacterium;s__Fusobacterium nucleatum	1989265	26.867	1940	186	NA	23_3	1	0
11	GCF_002763915.1	RefSeq R89	unsure	South Korea: Gwangju	100	1.69	d__Bacteria;p__Fusobacteriota;c__Fusobacteriia;o__Fusobacteriales;f__Fusobacteriaceae;g__Fusobacterium;s__Fusobacterium periodonticum_D	d__Bacteria;p__Fusobacteria;c__Fusobacteriia;o__Fusobacteriales;f__Fusobacteriaceae;g__Fusobacterium;s__Fusobacterium periodonticum	2643576	27.9757	2630	1	NA	21_19	1	1
12	GCF_000158235.1	RefSeq R89	unsure	none	100	0	d__Bacteria;p__Fusobacteriota;c__Fusobacteriia;o__Fusobacteriales;f__Fusobacteriaceae;g__Fusobacterium_C;s__Fusobacterium_C gonidiaformans	d__Bacteria;p__Fusobacteria;c__Fusobacteriia;o__Fusobacteriales;f__Fusobacteriaceae;g__Fusobacterium;s__Fusobacterium gonidiaformans	1930430	32.2742	1899	99	NA	4_2	0	0
13	GCF_002591555.1	RefSeq R89	unsure	South Korea: Gwangju	100	0	d__Bacteria;p__Fusobacteriota;c__Fusobacteriia;o__Fusobacteriales;f__Fusobacteriaceae;g__Fusobacterium;s__Fusobacterium polymorphum	d__Bacteria;p__Fusobacteria;c__Fusobacteriia;o__Fusobacteriales;f__Fusobacteriaceae;g__Fusobacterium;s__Fusobacterium nucleatum	2576233	27.1127	2491	22	NA	23_76	1	1
14	GCF_000455925.1	RefSeq R89	unsure	South Korea	98.88	1.12	d__Bacteria;p__Fusobacteriota;c__Fusobacteriia;o__Fusobacteriales;f__Fusobacteriaceae;g__Fusobacterium;s__Fusobacterium hwasookii	d__Bacteria;p__Fusobacteria;c__Fusobacteriia;o__Fusobacteriales;f__Fusobacteriaceae;g__Fusobacterium;s__Fusobacterium hwasookii	2441149	26.9532	2487	148	NA	23_46	1	0
15	GCF_001457555.1	RefSeq R89	unsure	USA	100	0	d__Bacteria;p__Fusobacteriota;c__Fusobacteriia;o__Fusobacteriales;f__Fusobacteriaceae;g__Fusobacterium;s__Fusobacterium polymorphum	d__Bacteria;p__Fusobacteria;c__Fusobacteriia;o__Fusobacteriales;f__Fusobacteriaceae;g__Fusobacterium;s__Fusobacterium nucleatum	2455060	26.9881	2335	2	NA	23_61	1	1
16	GCF_001597315.1	RefSeq R89	unsure	Denmark	100	0	d__Bacteria;p__Fusobacteriota;c__Fusobacteriia;o__Fusobacteriales;f__Fusobacteriaceae;g__Fusobacterium_C;s__Fusobacterium_C necrophorum	d__Bacteria;p__Fusobacteria;c__Fusobacteriia;o__Fusobacteriales;f__Fusobacteriaceae;g__Fusobacterium;s__Fusobacterium necrophorum	2099301	35.0949	2043	83	NA	5_2	0	0
17	GCF_000234075.2	RefSeq R89	unsure	USA	100	0	d__Bacteria;p__Fusobacteriota;c__Fusobacteriia;o__Fusobacteriales;f__Fusobacteriaceae;g__Fusobacterium;s__Fusobacterium animalis	d__Bacteria;p__Fusobacteria;c__Fusobacteriia;o__Fusobacteriales;f__Fusobacteriaceae;g__Fusobacterium;s__Fusobacterium nucleatum	2514030	26.9568	2433	2	NA	23_15	1	1
18	GCF_000279975.1	RefSeq R89	unsure	South Korea: Gwangju	98.72	0	d__Bacteria;p__Fusobacteriota;c__Fusobacteriia;o__Fusobacteriales;f__Fusobacteriaceae;g__Fusobacterium;s__Fusobacterium vincentii	d__Bacteria;p__Fusobacteria;c__Fusobacteriia;o__Fusobacteriales;f__Fusobacteriaceae;g__Fusobacterium;s__Fusobacterium nucleatum	1837113	27.2033	1863	198	NA	23_7	0	0
19	GCF_000691685.1	RefSeq R89	unsure	USA	100	0.56	d__Bacteria;p__Fusobacteriota;c__Fusobacteriia;o__Fusobacteriales;f__Fusobacteriaceae;g__Fusobacterium_C;s__Fusobacterium_C necrophorum	d__Bacteria;p__Fusobacteria;c__Fusobacteriia;o__Fusobacteriales;f__Fusobacteriaceae;g__Fusobacterium;s__Fusobacterium necrophorum	2532319	33.9491	2443	304	NA	5_1	1	1
20	GCA_000182945.1	RefSeq R89	unsure	none	94.92	1.12	d__Bacteria;p__Fusobacteriota;c__Fusobacteriia;o__Fusobacteriales;f__Fusobacteriaceae;g__Fusobacterium;s__Fusobacterium vincentii	d__Bacteria;p__Fusobacteria;c__Fusobacteriia;o__Fusobacteriales;f__Fusobacteriaceae;g__Fusobacterium;s__Fusobacterium nucleatum	2118259	27.3359	2336	302	NA	23_1	0	1
21	GCF_001597385.1	RefSeq R89	unsure	Denmark	100	0	d__Bacteria;p__Fusobacteriota;c__Fusobacteriia;o__Fusobacteriales;f__Fusobacteriaceae;g__Fusobacterium_C;s__Fusobacterium_C necrophorum	d__Bacteria;p__Fusobacteria;c__Fusobacteriia;o__Fusobacteriales;f__Fusobacteriaceae;g__Fusobacterium;s__Fusobacterium necrophorum	2100099	35.1173	2011	37	NA	5_3	0	0
22	GCF_001597445.1	RefSeq R89	unsure	Denmark	100	0	d__Bacteria;p__Fusobacteriota;c__Fusobacteriia;o__Fusobacteriales;f__Fusobacteriaceae;g__Fusobacterium_C;s__Fusobacterium_C necrophorum	d__Bacteria;p__Fusobacteria;c__Fusobacteriia;o__Fusobacteriales;f__Fusobacteriaceae;g__Fusobacterium;s__Fusobacterium necrophorum	2418865	34.9448	2480	46	NA	5_2	0	0
23	GCF_001810475.1	RefSeq R89	unsure	none	100	2.25	d__Bacteria;p__Fusobacteriota;c__Fusobacteriia;o__Fusobacteriales;f__Fusobacteriaceae;g__Fusobacterium_A;s__Fusobacterium_A varium_B	d__Bacteria;p__Fusobacteria;c__Fusobacteriia;o__Fusobacteriales;f__Fusobacteriaceae;g__Fusobacterium;s__	3501669	29.2327	3264	338	NA	12_2	1	0
24	GCF_000622245.1	RefSeq R89	unsure	none	100	1.12	d__Bacteria;p__Fusobacteriota;c__Fusobacteriia;o__Fusobacteriales;f__Fusobacteriaceae;g__Fusobacterium_B;s__Fusobacterium_B perfoetens	d__Bacteria;p__Fusobacteria;c__Fusobacteriia;o__Fusobacteriales;f__Fusobacteriaceae;g__Fusobacterium;s__Fusobacterium perfoetens	2103008	25.9699	1948	27	NA	19_0	0	0
25	GCA_000242215.1	RefSeq R89	unsure	none	91.85	0	d__Bacteria;p__Fusobacteriota;c__Fusobacteriia;o__Fusobacteriales;f__Fusobacteriaceae;g__Fusobacterium_C;s__Fusobacterium_C necrophorum	d__Bacteria;p__Fusobacteria;c__Fusobacteriia;o__Fusobacteriales;f__Fusobacteriaceae;g__Fusobacterium;s__Fusobacterium necrophorum	2312695	34.616	3185	40	NA	5_4	0	0
26	GCF_002243405.1	RefSeq R89	unsure	none	100	0	d__Bacteria;p__Fusobacteriota;c__Fusobacteriia;o__Fusobacteriales;f__Fusobacteriaceae;g__Fusobacterium;s__Fusobacterium nucleatum	d__Bacteria;p__Fusobacteria;c__Fusobacteriia;o__Fusobacteriales;f__Fusobacteriaceae;g__Fusobacterium;s__	2126947	27.3421	1981	80	NA	23_38	1	0
27	GCF_000691665.1	RefSeq R89	unsure	USA	99.44	0.37	d__Bacteria;p__Fusobacteriota;c__Fusobacteriia;o__Fusobacteriales;f__Fusobacteriaceae;g__Fusobacterium_C;s__Fusobacterium_C necrophorum	d__Bacteria;p__Fusobacteria;c__Fusobacteriia;o__Fusobacteriales;f__Fusobacteriaceae;g__Fusobacterium;s__Fusobacterium necrophorum	2459939	34.0485	2428	370	NA	5_1	1	1
28	GCF_001296145.1	RefSeq R89	unsure	South Korea: Gwangju	100	0	d__Bacteria;p__Fusobacteriota;c__Fusobacteriia;o__Fusobacteriales;f__Fusobacteriaceae;g__Fusobacterium;s__Fusobacterium animalis	d__Bacteria;p__Fusobacteria;c__Fusobacteriia;o__Fusobacteriales;f__Fusobacteriaceae;g__Fusobacterium;s__Fusobacterium nucleatum	2310804	27.0543	2196	1	NA	23_14	1	0
29	GCF_900478315.1	RefSeq R89	unsure	Papua New Guinea	100	2.25	d__Bacteria;p__Fusobacteriota;c__Fusobacteriia;o__Fusobacteriales;f__Fusobacteriaceae;g__Fusobacterium_A;s__Fusobacterium_A ulcerans	d__Bacteria;p__Fusobacteria;c__Fusobacteriia;o__Fusobacteriales;f__Fusobacteriaceae;g__Fusobacterium;s__Fusobacterium ulcerans	3539037	30.5473	3233	1	NA	11_4	4	0
30	GCF_000524215.1	RefSeq R89	unsure	none	100	0.16	d__Bacteria;p__Fusobacteriota;c__Fusobacteriia;o__Fusobacteriales;f__Fusobacteriaceae;g__Fusobacterium;s__Fusobacterium animalis	d__Bacteria;p__Fusobacteria;c__Fusobacteriia;o__Fusobacteriales;f__Fusobacteriaceae;g__Fusobacterium;s__	2442599	26.7177	2352	155	NA	23_33	1	1
31	GCF_003019715.1	RefSeq R89	unsure	none	100	0	d__Bacteria;p__Fusobacteriota;c__Fusobacteriia;o__Fusobacteriales;f__Fusobacteriaceae;g__Fusobacterium_C;s__Fusobacterium_C necrophorum	d__Bacteria;p__Fusobacteria;c__Fusobacteriia;o__Fusobacteriales;f__Fusobacteriaceae;g__Fusobacterium;s__Fusobacterium necrophorum	2286018	34.668	2125	1	NA	5_4	0	0
32	GCA_000433695.1	RefSeq R89	unsure	none	98.86	0.57	d__Bacteria;p__Fusobacteriota;c__Fusobacteriia;o__Fusobacteriales;f__Fusobacteriaceae;g__Fusobacterium;s__Fusobacterium animalis	d__Bacteria;p__Fusobacteria;c__Fusobacteriia;o__Fusobacteriales;f__Fusobacteriaceae;g__Fusobacterium;s__	2159799	26.7405	2189	199	NA	23_13	1	0
33	GCF_001546435.1	RefSeq R89	unsure	USA	100	1.7	d__Bacteria;p__Fusobacteriota;c__Fusobacteriia;o__Fusobacteriales;f__Fusobacteriaceae;g__Fusobacterium;s__Fusobacterium animalis	d__Bacteria;p__Fusobacteria;c__Fusobacteriia;o__Fusobacteriales;f__Fusobacteriaceae;g__Fusobacterium;s__Fusobacterium nucleatum	2392347	26.6688	2390	294	NA	23_13	1	0
34	GCF_001596485.1	RefSeq R89	unsure	Denmark	100	0	d__Bacteria;p__Fusobacteriota;c__Fusobacteriia;o__Fusobacteriales;f__Fusobacteriaceae;g__Fusobacterium_C;s__Fusobacterium_C necrophorum	d__Bacteria;p__Fusobacteria;c__Fusobacteriia;o__Fusobacteriales;f__Fusobacteriaceae;g__Fusobacterium;s__Fusobacterium necrophorum	2334503	34.3839	2343	117	NA	5_3	0	0
35	GCA_000158295.2	RefSeq R89	unsure	none	92.7	0	d__Bacteria;p__Fusobacteriota;c__Fusobacteriia;o__Fusobacteriales;f__Fusobacteriaceae;g__Fusobacterium_C;s__Fusobacterium_C necrophorum	d__Bacteria;p__Fusobacteria;c__Fusobacteriia;o__Fusobacteriales;f__Fusobacteriaceae;g__Fusobacterium;s__Fusobacterium necrophorum	1960925	35.1986	1928	118	NA	5_2	0	0
36	GCF_001597465.1	RefSeq R89	unsure	Denmark	100	0	d__Bacteria;p__Fusobacteriota;c__Fusobacteriia;o__Fusobacteriales;f__Fusobacteriaceae;g__Fusobacterium_C;s__Fusobacterium_C necrophorum	d__Bacteria;p__Fusobacteria;c__Fusobacteriia;o__Fusobacteriales;f__Fusobacteriaceae;g__Fusobacterium;s__Fusobacterium necrophorum	2285683	35.0802	2256	71	NA	5_2	0	0
37	GCF_000163915.2	RefSeq R89	unsure	none	100	0	d__Bacteria;p__Fusobacteriota;c__Fusobacteriia;o__Fusobacteriales;f__Fusobacteriaceae;g__Fusobacterium;s__Fusobacterium vincentii	d__Bacteria;p__Fusobacteria;c__Fusobacteriia;o__Fusobacteriales;f__Fusobacteriaceae;g__Fusobacterium;s__Fusobacterium nucleatum	2190228	27.0883	2034	3	NA	23_6	1	1
38	GCF_000479225.1	RefSeq R89	unsure	USA	100	0	d__Bacteria;p__Fusobacteriota;c__Fusobacteriia;o__Fusobacteriales;f__Fusobacteriaceae;g__Fusobacterium;s__Fusobacterium animalis	d__Bacteria;p__Fusobacteria;c__Fusobacteriia;o__Fusobacteriales;f__Fusobacteriaceae;g__Fusobacterium;s__Fusobacterium nucleatum	2391779	26.8766	2322	45	NA	23_27	1	0
39	GCF_001597485.1	RefSeq R89	unsure	Denmark	100	0	d__Bacteria;p__Fusobacteriota;c__Fusobacteriia;o__Fusobacteriales;f__Fusobacteriaceae;g__Fusobacterium_C;s__Fusobacterium_C necrophorum	d__Bacteria;p__Fusobacteria;c__Fusobacteriia;o__Fusobacteriales;f__Fusobacteriaceae;g__Fusobacterium;s__Fusobacterium necrophorum	2084658	35.1004	2022	105	NA	5_3	0	0
40	GCF_001296085.1	RefSeq R89	unsure	South Korea: Gwangju	100	0	d__Bacteria;p__Fusobacteriota;c__Fusobacteriia;o__Fusobacteriales;f__Fusobacteriaceae;g__Fusobacterium;s__Fusobacterium animalis	d__Bacteria;p__Fusobacteria;c__Fusobacteriia;o__Fusobacteriales;f__Fusobacteriaceae;g__Fusobacterium;s__Fusobacterium nucleatum	2549353	26.9376	2392	1	NA	23_35	1	1
41	GCF_002211625.1	RefSeq R89	unsure	South Korea: Gwangju	100	0	d__Bacteria;p__Fusobacteriota;c__Fusobacteriia;o__Fusobacteriales;f__Fusobacteriaceae;g__Fusobacterium;s__Fusobacterium polymorphum	d__Bacteria;p__Fusobacteria;c__Fusobacteriia;o__Fusobacteriales;f__Fusobacteriaceae;g__Fusobacterium;s__Fusobacterium nucleatum	2521394	26.8319	2409	1	NA	23_71	1	0
42	GCF_000235465.1	RefSeq R89	unsure	none	100	0	d__Bacteria;p__Fusobacteriota;c__Fusobacteriia;o__Fusobacteriales;f__Fusobacteriaceae;g__Fusobacterium;s__Fusobacterium sp000235465	d__Bacteria;p__Fusobacteria;c__Fusobacteriia;o__Fusobacteriales;f__Fusobacteriaceae;g__Fusobacterium;s__	2093299	27.5009	2224	287	NA	21_2	1	0
43	GCF_002761935.1	RefSeq R89	unsure	South Korea	100	0.56	d__Bacteria;p__Fusobacteriota;c__Fusobacteriia;o__Fusobacteriales;f__Fusobacteriaceae;g__Fusobacterium;s__Fusobacterium periodonticum_C	d__Bacteria;p__Fusobacteria;c__Fusobacteriia;o__Fusobacteriales;f__Fusobacteriaceae;g__Fusobacterium;s__Fusobacterium periodonticum	2298437	28.2509	2156	4	NA	21_9	1	1
44	GCF_000455985.1	RefSeq R89	unsure	South Korea	100	0	d__Bacteria;p__Fusobacteriota;c__Fusobacteriia;o__Fusobacteriales;f__Fusobacteriaceae;g__Fusobacterium;s__Fusobacterium animalis	d__Bacteria;p__Fusobacteria;c__Fusobacteriia;o__Fusobacteriales;f__Fusobacteriaceae;g__Fusobacterium;s__Fusobacterium nucleatum	2265718	26.8596	2225	123	NA	23_14	1	0
45	GCF_001455105.1	RefSeq R89	unsure	South Korea: Gwangju	100	2.25	d__Bacteria;p__Fusobacteriota;c__Fusobacteriia;o__Fusobacteriales;f__Fusobacteriaceae;g__Fusobacterium;s__Fusobacterium hwasookii	d__Bacteria;p__Fusobacteria;c__Fusobacteriia;o__Fusobacteriales;f__Fusobacteriaceae;g__Fusobacterium;s__Fusobacterium hwasookii	2527063	27.1184	2456	2	NA	23_46	1	0
46	GCF_000455865.1	RefSeq R89	unsure	South Korea	98.88	0.37	d__Bacteria;p__Fusobacteriota;c__Fusobacteriia;o__Fusobacteriales;f__Fusobacteriaceae;g__Fusobacterium;s__Fusobacterium hwasookii	d__Bacteria;p__Fusobacteria;c__Fusobacteriia;o__Fusobacteriales;f__Fusobacteriaceae;g__Fusobacterium;s__Fusobacterium hwasookii	2280257	26.9927	2217	164	NA	23_46	1	0
47	GCF_002761995.1	RefSeq R89	unsure	none	100	0	d__Bacteria;p__Fusobacteriota;c__Fusobacteriia;o__Fusobacteriales;f__Fusobacteriaceae;g__Fusobacterium_C;s__Fusobacterium_C necrophorum	d__Bacteria;p__Fusobacteria;c__Fusobacteriia;o__Fusobacteriales;f__Fusobacteriaceae;g__Fusobacterium;s__Fusobacterium necrophorum	2094695	35.2238	1997	34	NA	5_2	0	0
48	GCF_000479185.1	RefSeq R89	unsure	USA	100	0	d__Bacteria;p__Fusobacteriota;c__Fusobacteriia;o__Fusobacteriales;f__Fusobacteriaceae;g__Fusobacterium;s__Fusobacterium polymorphum	d__Bacteria;p__Fusobacteria;c__Fusobacteriia;o__Fusobacteriales;f__Fusobacteriaceae;g__Fusobacterium;s__Fusobacterium nucleatum	2447188	26.7966	2423	79	NA	23_73	1	0
49	GCF_000007325.1	RefSeq R89	unsure	none	99.95	0	d__Bacteria;p__Fusobacteriota;c__Fusobacteriia;o__Fusobacteriales;f__Fusobacteriaceae;g__Fusobacterium;s__Fusobacterium nucleatum	d__Bacteria;p__Fusobacteria;c__Fusobacteriia;o__Fusobacteriales;f__Fusobacteriaceae;g__Fusobacterium;s__Fusobacterium nucleatum	2174500	27.1516	2022	1	NA	23_41	1	1
50	GCF_900015295.1	RefSeq R89	unsure	USA	98.88	1.12	d__Bacteria;p__Fusobacteriota;c__Fusobacteriia;o__Fusobacteriales;f__Fusobacteriaceae;g__Fusobacterium_A;s__Fusobacterium_A sp900015295	d__Bacteria;p__Fusobacteria;c__Fusobacteriia;o__Fusobacteriales;f__Fusobacteriaceae;g__Fusobacterium;s__	2036955	28.8975	1859	8	NA	15_1	0	0
51	GCF_000158535.2	RefSeq R89	unsure	USA	96.59	0	d__Bacteria;p__Fusobacteriota;c__Fusobacteriia;o__Fusobacteriales;f__Fusobacteriaceae;g__Fusobacterium;s__Fusobacterium animalis	d__Bacteria;p__Fusobacteria;c__Fusobacteriia;o__Fusobacteriales;f__Fusobacteriaceae;g__Fusobacterium;s__Fusobacterium nucleatum	2363537	26.8904	2359	165	NA	23_19	1	0
52	GCF_000218645.2	RefSeq R89	unsure	USA	100	0	d__Bacteria;p__Fusobacteriota;c__Fusobacteriia;o__Fusobacteriales;f__Fusobacteriaceae;g__Fusobacterium;s__Fusobacterium animalis	d__Bacteria;p__Fusobacteria;c__Fusobacteriia;o__Fusobacteriales;f__Fusobacteriaceae;g__Fusobacterium;s__Fusobacterium nucleatum	2154007	27.0259	2026	2	NA	23_21	1	0
53	GCF_000479245.1	RefSeq R89	unsure	USA	100	0	d__Bacteria;p__Fusobacteriota;c__Fusobacteriia;o__Fusobacteriales;f__Fusobacteriaceae;g__Fusobacterium;s__Fusobacterium animalis	d__Bacteria;p__Fusobacteria;c__Fusobacteriia;o__Fusobacteriales;f__Fusobacteriaceae;g__Fusobacterium;s__Fusobacterium nucleatum	2205574	26.8172	2054	22	NA	23_22	1	0
54	GCF_001597545.1	RefSeq R89	unsure	Denmark	100	0	d__Bacteria;p__Fusobacteriota;c__Fusobacteriia;o__Fusobacteriales;f__Fusobacteriaceae;g__Fusobacterium_C;s__Fusobacterium_C necrophorum	d__Bacteria;p__Fusobacteria;c__Fusobacteriia;o__Fusobacteriales;f__Fusobacteriaceae;g__Fusobacterium;s__Fusobacterium necrophorum	2110484	35.247	2017	72	NA	5_2	0	0
55	GCF_000163935.1	RefSeq R89	unsure	none	100	0	d__Bacteria;p__Fusobacteriota;c__Fusobacteriia;o__Fusobacteriales;f__Fusobacteriaceae;g__Fusobacterium;s__Fusobacterium periodonticum_B	d__Bacteria;p__Fusobacteria;c__Fusobacteriia;o__Fusobacteriales;f__Fusobacteriaceae;g__Fusobacterium;s__Fusobacterium periodonticum	2479455	27.8808	2397	80	NA	21_60	1	1
56	GCA_002762005.1	RefSeq R89	unsure	Spain	100	0	d__Bacteria;p__Fusobacteriota;c__Fusobacteriia;o__Fusobacteriales;f__Fusobacteriaceae;g__Fusobacterium;s__Fusobacterium animalis	d__Bacteria;p__Fusobacteria;c__Fusobacteriia;o__Fusobacteriales;f__Fusobacteriaceae;g__Fusobacterium;s__Fusobacterium nucleatum	2351018	26.8751	2283	112	NA	23_31	1	1
57	GCF_000273625.1	RefSeq R89	unsure	USA	100	0	d__Bacteria;p__Fusobacteriota;c__Fusobacteriia;o__Fusobacteriales;f__Fusobacteriaceae;g__Fusobacterium;s__Fusobacterium animalis	d__Bacteria;p__Fusobacteria;c__Fusobacteriia;o__Fusobacteriales;f__Fusobacteriaceae;g__Fusobacterium;s__Fusobacterium nucleatum	2515488	26.9551	2425	4	NA	23_15	1	1
58	GCA_001296125.1	RefSeq R89	unsure	South Korea: Gwangju	100	0	d__Bacteria;p__Fusobacteriota;c__Fusobacteriia;o__Fusobacteriales;f__Fusobacteriaceae;g__Fusobacterium;s__Fusobacterium vincentii	d__Bacteria;p__Fusobacteria;c__Fusobacteriia;o__Fusobacteriales;f__Fusobacteriaceae;g__Fusobacterium;s__Fusobacterium nucleatum	2038535	27.0804	1875	1	NA	23_3	1	0
59	GCF_000381725.1	RefSeq R89	unsure	none	98.88	0	d__Bacteria;p__Fusobacteriota;c__Fusobacteriia;o__Fusobacteriales;f__Fusobacteriaceae;g__Fusobacterium;s__Fusobacterium russii	d__Bacteria;p__Fusobacteria;c__Fusobacteriia;o__Fusobacteriales;f__Fusobacteriaceae;g__Fusobacterium;s__Fusobacterium russii	1941804	28.6431	1760	46	NA	24_0	1	1
60	GCF_003019755.1	RefSeq R89	unsure	none	100	0.56	d__Bacteria;p__Fusobacteriota;c__Fusobacteriia;o__Fusobacteriales;f__Fusobacteriaceae;g__Fusobacterium;s__Fusobacterium periodonticum_D	d__Bacteria;p__Fusobacteria;c__Fusobacteriia;o__Fusobacteriales;f__Fusobacteriaceae;g__Fusobacterium;s__Fusobacterium periodonticum	2541084	28.1275	2388	1	NA	21_16	1	1
61	GCF_000455905.1	RefSeq R89	unsure	South Korea	100	0	d__Bacteria;p__Fusobacteriota;c__Fusobacteriia;o__Fusobacteriales;f__Fusobacteriaceae;g__Fusobacterium;s__Fusobacterium hwasookii	d__Bacteria;p__Fusobacteria;c__Fusobacteriia;o__Fusobacteriales;f__Fusobacteriaceae;g__Fusobacterium;s__Fusobacterium hwasookii	2362473	27.0575	2401	173	NA	23_45	1	0
62	GCF_002591465.1	RefSeq R89	unsure	South Korea: Gwangju	100	1.12	d__Bacteria;p__Fusobacteriota;c__Fusobacteriia;o__Fusobacteriales;f__Fusobacteriaceae;g__Fusobacterium;s__Fusobacterium polymorphum	d__Bacteria;p__Fusobacteria;c__Fusobacteriia;o__Fusobacteriales;f__Fusobacteriaceae;g__Fusobacterium;s__Fusobacterium nucleatum	2509794	26.6717	2423	54	NA	23_66	1	0
63	GCF_003226385.1	RefSeq R89	unsure	USA: Buffalo	100	0	d__Bacteria;p__Fusobacteriota;c__Fusobacteriia;o__Fusobacteriales;f__Fusobacteriaceae;g__Fusobacterium;s__Fusobacterium polymorphum	d__Bacteria;p__Fusobacteria;c__Fusobacteriia;o__Fusobacteriales;f__Fusobacteriaceae;g__Fusobacterium;s__Fusobacterium nucleatum	2429502	26.7989	2402	55	NA	23_62	1	0
64	GCF_002211605.1	RefSeq R89	unsure	South Korea	100	0	d__Bacteria;p__Fusobacteriota;c__Fusobacteriia;o__Fusobacteriales;f__Fusobacteriaceae;g__Fusobacterium;s__Fusobacterium nucleatum	d__Bacteria;p__Fusobacteria;c__Fusobacteriia;o__Fusobacteriales;f__Fusobacteriaceae;g__Fusobacterium;s__Fusobacterium nucleatum	2233010	27.0839	2125	1	NA	23_40	1	1
65	GCA_002762015.1	RefSeq R89	unsure	Spain	100	0	d__Bacteria;p__Fusobacteriota;c__Fusobacteriia;o__Fusobacteriales;f__Fusobacteriaceae;g__Fusobacterium;s__Fusobacterium animalis	d__Bacteria;p__Fusobacteria;c__Fusobacteriia;o__Fusobacteriales;f__Fusobacteriaceae;g__Fusobacterium;s__Fusobacterium nucleatum	2346246	26.8977	2289	150	NA	23_31	1	1
66	GCF_003019695.1	RefSeq R89	unsure	none	100	0	d__Bacteria;p__Fusobacteriota;c__Fusobacteriia;o__Fusobacteriales;f__Fusobacteriaceae;g__Fusobacterium_C;s__Fusobacterium_C gonidiaformans	d__Bacteria;p__Fusobacteria;c__Fusobacteriia;o__Fusobacteriales;f__Fusobacteriaceae;g__Fusobacterium;s__Fusobacterium gonidiaformans	1678881	32.6864	1617	1	NA	4_1	0	0
67	GCF_000158315.2	RefSeq R89	unsure	none	100	2.25	d__Bacteria;p__Fusobacteriota;c__Fusobacteriia;o__Fusobacteriales;f__Fusobacteriaceae;g__Fusobacterium_A;s__Fusobacterium_A ulcerans	d__Bacteria;p__Fusobacteria;c__Fusobacteriia;o__Fusobacteriales;f__Fusobacteriaceae;g__Fusobacterium;s__Fusobacterium ulcerans	3487504	30.3802	3236	49	NA	11_4	4	0
68	GCF_002763625.1	RefSeq R89	unsure	South Korea	100	0.56	d__Bacteria;p__Fusobacteriota;c__Fusobacteriia;o__Fusobacteriales;f__Fusobacteriaceae;g__Fusobacterium;s__Fusobacterium periodonticum_C	d__Bacteria;p__Fusobacteria;c__Fusobacteriia;o__Fusobacteriales;f__Fusobacteriaceae;g__Fusobacterium;s__Fusobacterium periodonticum	2372880	28.0428	2212	1	NA	21_11	1	1
69	GCA_002573475.1	RefSeq R89	unsure	South Korea	100	0	d__Bacteria;p__Fusobacteriota;c__Fusobacteriia;o__Fusobacteriales;f__Fusobacteriaceae;g__Fusobacterium;s__Fusobacterium animalis	d__Bacteria;p__Fusobacteria;c__Fusobacteriia;o__Fusobacteriales;f__Fusobacteriaceae;g__Fusobacterium;s__Fusobacterium nucleatum	2674036	26.894	2527	4	NA	23_34	1	1
70	GCA_000814775.1	RefSeq R89	unsure	USA: Kansas	97.47	0	d__Bacteria;p__Fusobacteriota;c__Fusobacteriia;o__Fusobacteriales;f__Fusobacteriaceae;g__Fusobacterium_C;s__Fusobacterium_C necrophorum	d__Bacteria;p__Fusobacteria;c__Fusobacteriia;o__Fusobacteriales;f__Fusobacteriaceae;g__Fusobacterium;s__Fusobacterium necrophorum	2054808	34.9809	2337	42	NA	5_4	0	0
71	GCA_001455125.1	RefSeq R89	unsure	South Korea: Gwangju	100	0	d__Bacteria;p__Fusobacteriota;c__Fusobacteriia;o__Fusobacteriales;f__Fusobacteriaceae;g__Fusobacterium;s__Fusobacterium polymorphum	d__Bacteria;p__Fusobacteria;c__Fusobacteriia;o__Fusobacteriales;f__Fusobacteriaceae;g__Fusobacterium;s__Fusobacterium nucleatum	2481490	26.9912	2352	4	NA	23_68	1	0
72	GCF_001596495.1	RefSeq R89	unsure	Denmark	100	0	d__Bacteria;p__Fusobacteriota;c__Fusobacteriia;o__Fusobacteriales;f__Fusobacteriaceae;g__Fusobacterium_C;s__Fusobacterium_C necrophorum	d__Bacteria;p__Fusobacteria;c__Fusobacteriia;o__Fusobacteriales;f__Fusobacteriaceae;g__Fusobacterium;s__Fusobacterium necrophorum	1981459	35.2151	1829	38	NA	5_2	0	0
73	GCF_000691705.1	RefSeq R89	unsure	USA	100	0	d__Bacteria;p__Fusobacteriota;c__Fusobacteriia;o__Fusobacteriales;f__Fusobacteriaceae;g__Fusobacterium_C;s__Fusobacterium_C necrophorum	d__Bacteria;p__Fusobacteria;c__Fusobacteriia;o__Fusobacteriales;f__Fusobacteriaceae;g__Fusobacterium;s__Fusobacterium necrophorum	2520035	34.0062	2396	254	NA	5_1	1	1
74	GCF_000242975.1	RefSeq R89	unsure	USA	100	0	d__Bacteria;p__Fusobacteriota;c__Fusobacteriia;o__Fusobacteriales;f__Fusobacteriaceae;g__Fusobacterium;s__Fusobacterium animalis	d__Bacteria;p__Fusobacteria;c__Fusobacteriia;o__Fusobacteriales;f__Fusobacteriaceae;g__Fusobacterium;s__Fusobacterium nucleatum	2424697	26.8399	2287	39	NA	23_25	1	1
75	GCF_000600355.1	RefSeq R89	unsure	USA: Kansas	100	0	d__Bacteria;p__Fusobacteriota;c__Fusobacteriia;o__Fusobacteriales;f__Fusobacteriaceae;g__Fusobacterium_C;s__Fusobacterium_C necrophorum	d__Bacteria;p__Fusobacteria;c__Fusobacteriia;o__Fusobacteriales;f__Fusobacteriaceae;g__Fusobacterium;s__Fusobacterium necrophorum	2088497	34.9911	1929	40	NA	5_4	0	0
76	GCF_002591505.1	RefSeq R89	unsure	South Korea: Gwangju	100	1.12	d__Bacteria;p__Fusobacteriota;c__Fusobacteriia;o__Fusobacteriales;f__Fusobacteriaceae;g__Fusobacterium;s__Fusobacterium polymorphum	d__Bacteria;p__Fusobacteria;c__Fusobacteriia;o__Fusobacteriales;f__Fusobacteriaceae;g__Fusobacterium;s__Fusobacterium nucleatum	2544849	26.9316	2465	44	NA	23_54	1	1
77	GCF_003019675.1	RefSeq R89	unsure	none	100	2.25	d__Bacteria;p__Fusobacteriota;c__Fusobacteriia;o__Fusobacteriales;f__Fusobacteriaceae;g__Fusobacterium_A;s__Fusobacterium_A ulcerans	d__Bacteria;p__Fusobacteria;c__Fusobacteriia;o__Fusobacteriales;f__Fusobacteriaceae;g__Fusobacterium;s__Fusobacterium ulcerans	3537675	30.5471	3230	1	NA	11_4	4	0
78	GCF_001597395.1	RefSeq R89	unsure	Denmark	100	0	d__Bacteria;p__Fusobacteriota;c__Fusobacteriia;o__Fusobacteriales;f__Fusobacteriaceae;g__Fusobacterium_C;s__Fusobacterium_C necrophorum	d__Bacteria;p__Fusobacteria;c__Fusobacteriia;o__Fusobacteriales;f__Fusobacteriaceae;g__Fusobacterium;s__Fusobacterium necrophorum	2239285	34.848	2236	49	NA	5_2	0	0
79	GCF_003019315.1	RefSeq R89	unsure	none	98.88	1.12	d__Bacteria;p__Fusobacteriota;c__Fusobacteriia;o__Fusobacteriales;f__Fusobacteriaceae;g__Fusobacterium_A;s__Fusobacterium_A mortiferum	d__Bacteria;p__Fusobacteria;c__Fusobacteriia;o__Fusobacteriales;f__Fusobacteriaceae;g__Fusobacterium;s__Fusobacterium mortiferum	2716766	29.2887	2631	1	NA	18_1	0	0
80	GCF_000162355.2	RefSeq R89	unsure	none	100	0	d__Bacteria;p__Fusobacteriota;c__Fusobacteriia;o__Fusobacteriales;f__Fusobacteriaceae;g__Fusobacterium;s__Fusobacterium animalis	d__Bacteria;p__Fusobacteria;c__Fusobacteriia;o__Fusobacteriales;f__Fusobacteriaceae;g__Fusobacterium;s__Fusobacterium nucleatum	2302090	27.025	2103	18	NA	23_26	1	1
81	GCF_001815715.1	RefSeq R89	unsure	none	100	0	d__Bacteria;p__Fusobacteriota;c__Fusobacteriia;o__Fusobacteriales;f__Fusobacteriaceae;g__Fusobacterium;s__Fusobacterium polymorphum	d__Bacteria;p__Fusobacteria;c__Fusobacteriia;o__Fusobacteriales;f__Fusobacteriaceae;g__Fusobacterium;s__	2401628	26.791	2333	178	NA	23_72	1	0
82	GCF_002591545.1	RefSeq R89	unsure	South Korea: Gwangju	100	0	d__Bacteria;p__Fusobacteriota;c__Fusobacteriia;o__Fusobacteriales;f__Fusobacteriaceae;g__Fusobacterium;s__Fusobacterium polymorphum	d__Bacteria;p__Fusobacteria;c__Fusobacteriia;o__Fusobacteriales;f__Fusobacteriaceae;g__Fusobacterium;s__Fusobacterium nucleatum	2489425	26.9202	2391	50	NA	23_56	1	1
83	GCF_000691725.1	RefSeq R89	unsure	USA	100	1.12	d__Bacteria;p__Fusobacteriota;c__Fusobacteriia;o__Fusobacteriales;f__Fusobacteriaceae;g__Fusobacterium_C;s__Fusobacterium_C necrophorum	d__Bacteria;p__Fusobacteria;c__Fusobacteriia;o__Fusobacteriales;f__Fusobacteriaceae;g__Fusobacterium;s__Fusobacterium necrophorum	2608492	33.8401	2665	389	NA	5_1	1	1
84	GCF_000158275.2	RefSeq R89	unsure	USA	100	0	d__Bacteria;p__Fusobacteriota;c__Fusobacteriia;o__Fusobacteriales;f__Fusobacteriaceae;g__Fusobacterium;s__Fusobacterium animalis	d__Bacteria;p__Fusobacteria;c__Fusobacteriia;o__Fusobacteriales;f__Fusobacteriaceae;g__Fusobacterium;s__Fusobacterium nucleatum	2514029	26.9568	2434	2	NA	23_15	1	1
85	GCF_001854465.1	RefSeq R89	unsure	USA: Seattle	100	0.56	d__Bacteria;p__Fusobacteriota;c__Fusobacteriia;o__Fusobacteriales;f__Fusobacteriaceae;g__Fusobacterium;s__Fusobacterium vincentii	d__Bacteria;p__Fusobacteria;c__Fusobacteriia;o__Fusobacteriales;f__Fusobacteriaceae;g__Fusobacterium;s__Fusobacterium nucleatum	2143397	26.9897	1982	62	NA	23_7	1	0
86	GCF_002749995.1	RefSeq R89	unsure	South Korea: Gwangju	100	0	d__Bacteria;p__Fusobacteriota;c__Fusobacteriia;o__Fusobacteriales;f__Fusobacteriaceae;g__Fusobacterium;s__Fusobacterium vincentii	d__Bacteria;p__Fusobacteria;c__Fusobacteriia;o__Fusobacteriales;f__Fusobacteriaceae;g__Fusobacterium;s__Fusobacterium nucleatum	2054883	27.1687	1886	3	NA	23_3	1	0
87	GCF_002763815.1	RefSeq R89	unsure	South Korea	100	0.72	d__Bacteria;p__Fusobacteriota;c__Fusobacteriia;o__Fusobacteriales;f__Fusobacteriaceae;g__Fusobacterium;s__Fusobacterium periodonticum_C	d__Bacteria;p__Fusobacteria;c__Fusobacteriia;o__Fusobacteriales;f__Fusobacteriaceae;g__Fusobacterium;s__Fusobacterium periodonticum	2273832	28.1417	2147	1	NA	21_8	1	1
88	GCF_001455145.1	RefSeq R89	unsure	South Korea: Gwangju	100	1.12	d__Bacteria;p__Fusobacteriota;c__Fusobacteriia;o__Fusobacteriales;f__Fusobacteriaceae;g__Fusobacterium;s__Fusobacterium hwasookii	d__Bacteria;p__Fusobacteria;c__Fusobacteriia;o__Fusobacteriales;f__Fusobacteriaceae;g__Fusobacterium;s__Fusobacterium hwasookii	2531722	27.1077	2339	3	NA	23_47	1	0
89	GCF_000273605.1	RefSeq R89	unsure	none	100	0	d__Bacteria;p__Fusobacteriota;c__Fusobacteriia;o__Fusobacteriales;f__Fusobacteriaceae;g__Fusobacterium;s__Fusobacterium animalis	d__Bacteria;p__Fusobacteria;c__Fusobacteriia;o__Fusobacteriales;f__Fusobacteriaceae;g__Fusobacterium;s__Fusobacterium nucleatum	2438048	26.9709	2306	5	NA	23_25	1	1
90	GCF_002761955.1	RefSeq R89	unsure	South Korea: Gwangju	100	0.56	d__Bacteria;p__Fusobacteriota;c__Fusobacteriia;o__Fusobacteriales;f__Fusobacteriaceae;g__Fusobacterium;s__Fusobacterium periodonticum_C	d__Bacteria;p__Fusobacteria;c__Fusobacteriia;o__Fusobacteriales;f__Fusobacteriaceae;g__Fusobacterium;s__Fusobacterium periodonticum	2413057	28.0713	2328	2	NA	21_13	1	0
91	GCF_001296165.1	RefSeq R89	unsure	South Korea: Gwangju	100	0	d__Bacteria;p__Fusobacteriota;c__Fusobacteriia;o__Fusobacteriales;f__Fusobacteriaceae;g__Fusobacterium;s__Fusobacterium nucleatum	d__Bacteria;p__Fusobacteria;c__Fusobacteriia;o__Fusobacteriales;f__Fusobacteriaceae;g__Fusobacterium;s__Fusobacterium nucleatum	2227266	27.1401	2115	1	NA	23_40	1	1
92	GCA_001296185.1	RefSeq R89	unsure	South Korea: Gwangju	100	0	d__Bacteria;p__Fusobacteriota;c__Fusobacteriia;o__Fusobacteriales;f__Fusobacteriaceae;g__Fusobacterium;s__Fusobacterium nucleatum	d__Bacteria;p__Fusobacteria;c__Fusobacteriia;o__Fusobacteriales;f__Fusobacteriaceae;g__Fusobacterium;s__Fusobacterium nucleatum	2290405	27.0372	2163	1	NA	23_43	1	1
93	GCF_001810995.1	RefSeq R89	unsure	none	100	0	d__Bacteria;p__Fusobacteriota;c__Fusobacteriia;o__Fusobacteriales;f__Fusobacteriaceae;g__Fusobacterium;s__Fusobacterium vincentii	d__Bacteria;p__Fusobacteria;c__Fusobacteriia;o__Fusobacteriales;f__Fusobacteriaceae;g__Fusobacterium;s__	2121738	26.8245	1982	121	NA	23_2	1	0
94	GCF_000691745.1	RefSeq R89	unsure	USA	100	0.56	d__Bacteria;p__Fusobacteriota;c__Fusobacteriia;o__Fusobacteriales;f__Fusobacteriaceae;g__Fusobacterium_C;s__Fusobacterium_C necrophorum	d__Bacteria;p__Fusobacteria;c__Fusobacteriia;o__Fusobacteriales;f__Fusobacteriaceae;g__Fusobacterium;s__Fusobacterium necrophorum	2520807	33.956	2389	226	NA	5_1	1	1
95	GCF_000153625.3	RefSeq R89	unsure	none	98.88	0	d__Bacteria;p__Fusobacteriota;c__Fusobacteriia;o__Fusobacteriales;f__Fusobacteriaceae;g__Fusobacterium;s__Fusobacterium polymorphum	d__Bacteria;p__Fusobacteria;c__Fusobacteriia;o__Fusobacteriales;f__Fusobacteriaceae;g__Fusobacterium;s__Fusobacterium nucleatum	2441632	26.8238	2333	15	NA	23_61	1	1
96	GCF_002763775.1	RefSeq R89	unsure	South Korea: Gwangju	100	0.16	d__Bacteria;p__Fusobacteriota;c__Fusobacteriia;o__Fusobacteriales;f__Fusobacteriaceae;g__Fusobacterium;s__Fusobacterium periodonticum_C	d__Bacteria;p__Fusobacteria;c__Fusobacteriia;o__Fusobacteriales;f__Fusobacteriaceae;g__Fusobacterium;s__Fusobacterium periodonticum	2216236	28.3052	2099	1	NA	21_5	1	0
97	GCF_900104395.1	RefSeq R89	unsure	none	100	0	d__Bacteria;p__Fusobacteriota;c__Fusobacteriia;o__Fusobacteriales;f__Fusobacteriaceae;g__Fusobacterium_C;s__Fusobacterium_C necrophorum	d__Bacteria;p__Fusobacteria;c__Fusobacteriia;o__Fusobacteriales;f__Fusobacteriaceae;g__Fusobacterium;s__Fusobacterium necrophorum	2550375	33.9994	2327	94	NA	5_1	1	1
98	GCF_002417615.1	RefSeq R89	unsure	USA	100	0.56	d__Bacteria;p__Fusobacteriota;c__Fusobacteriia;o__Fusobacteriales;f__Fusobacteriaceae;g__Fusobacterium;s__Fusobacterium polymorphum	d__Bacteria;p__Fusobacteria;c__Fusobacteriia;o__Fusobacteriales;f__Fusobacteriaceae;g__Fusobacterium;s__Fusobacterium nucleatum	2470496	26.795	2549	234	NA	23_62	1	0
99	GCF_000493815.1	RefSeq R89	unsure	United Kingdom	100	0	d__Bacteria;p__Fusobacteriota;c__Fusobacteriia;o__Fusobacteriales;f__Fusobacteriaceae;g__Fusobacterium;s__Fusobacterium nucleatum_E	d__Bacteria;p__Fusobacteria;c__Fusobacteriia;o__Fusobacteriales;f__Fusobacteriaceae;g__Fusobacterium;s__Fusobacterium nucleatum	2477971	27.5798	2311	757	NA	22_2	1	0
100	GCF_001597325.1	RefSeq R89	unsure	Denmark	100	0	d__Bacteria;p__Fusobacteriota;c__Fusobacteriia;o__Fusobacteriales;f__Fusobacteriaceae;g__Fusobacterium_C;s__Fusobacterium_C necrophorum	d__Bacteria;p__Fusobacteria;c__Fusobacteriia;o__Fusobacteriales;f__Fusobacteriaceae;g__Fusobacterium;s__Fusobacterium necrophorum	2098951	35.1393	1996	56	NA	5_2	0	0
101	GCF_000178895.1	RefSeq R89	unsure	USA	100	0.16	d__Bacteria;p__Fusobacteriota;c__Fusobacteriia;o__Fusobacteriales;f__Fusobacteriaceae;g__Fusobacterium;s__Fusobacterium nucleatum	d__Bacteria;p__Fusobacteria;c__Fusobacteriia;o__Fusobacteriales;f__Fusobacteriaceae;g__Fusobacterium;s__Fusobacterium nucleatum	2237034	27.0236	2097	67	NA	23_39	1	1
102	GCF_002763695.1	RefSeq R89	unsure	South Korea: Gwangju	100	1.69	d__Bacteria;p__Fusobacteriota;c__Fusobacteriia;o__Fusobacteriales;f__Fusobacteriaceae;g__Fusobacterium;s__Fusobacterium periodonticum_D	d__Bacteria;p__Fusobacteria;c__Fusobacteriia;o__Fusobacteriales;f__Fusobacteriaceae;g__Fusobacterium;s__Fusobacterium periodonticum	2651118	27.9639	2643	1	NA	21_19	1	1
103	GCF_000691645.1	RefSeq R89	unsure	USA	100	1.12	d__Bacteria;p__Fusobacteriota;c__Fusobacteriia;o__Fusobacteriales;f__Fusobacteriaceae;g__Fusobacterium_C;s__Fusobacterium_C necrophorum	d__Bacteria;p__Fusobacteria;c__Fusobacteriia;o__Fusobacteriales;f__Fusobacteriaceae;g__Fusobacterium;s__Fusobacterium necrophorum	2458422	34.0677	2318	235	NA	5_1	1	0
104	GCF_002591585.1	RefSeq R89	unsure	South Korea: Gwangju	100	1.12	d__Bacteria;p__Fusobacteriota;c__Fusobacteriia;o__Fusobacteriales;f__Fusobacteriaceae;g__Fusobacterium;s__Fusobacterium polymorphum	d__Bacteria;p__Fusobacteria;c__Fusobacteriia;o__Fusobacteriales;f__Fusobacteriaceae;g__Fusobacterium;s__Fusobacterium nucleatum	2555193	26.8408	2426	68	NA	23_52	1	1
105	GCF_002573625.1	RefSeq R89	unsure	none	100	1.28	d__Bacteria;p__Fusobacteriota;c__Fusobacteriia;o__Fusobacteriales;f__Fusobacteriaceae;g__Fusobacterium;s__Fusobacterium nucleatum_D	d__Bacteria;p__Fusobacteria;c__Fusobacteriia;o__Fusobacteriales;f__Fusobacteriaceae;g__Fusobacterium;s__Fusobacterium nucleatum	2856440	26.7809	2922	16	NA	23_77	1	0
106	GCF_002761915.1	RefSeq R89	unsure	South Korea: Gwangju	100	1.12	d__Bacteria;p__Fusobacteriota;c__Fusobacteriia;o__Fusobacteriales;f__Fusobacteriaceae;g__Fusobacterium;s__Fusobacterium polymorphum	d__Bacteria;p__Fusobacteria;c__Fusobacteriia;o__Fusobacteriales;f__Fusobacteriaceae;g__Fusobacterium;s__Fusobacterium periodonticum	2554714	26.9296	2473	2	NA	23_55	1	1
107	GCF_000297655.1	RefSeq R89	unsure	none	95.51	0	d__Bacteria;p__Fusobacteriota;c__Fusobacteriia;o__Fusobacteriales;f__Fusobacteriaceae;g__Fusobacterium;s__Fusobacterium periodonticum_D	d__Bacteria;p__Fusobacteria;c__Fusobacteriia;o__Fusobacteriales;f__Fusobacteriaceae;g__Fusobacterium;s__Fusobacterium periodonticum	2574015	27.7626	2457	429	NA	21_17	1	1
108	GCF_000347315.1	RefSeq R89	unsure	none	100	0	d__Bacteria;p__Fusobacteriota;c__Fusobacteriia;o__Fusobacteriales;f__Fusobacteriaceae;g__Fusobacterium;s__Fusobacterium vincentii	d__Bacteria;p__Fusobacteria;c__Fusobacteriia;o__Fusobacteriales;f__Fusobacteriaceae;g__Fusobacterium;s__Fusobacterium nucleatum	2069558	27.1885	2003	379	NA	23_5	1	1
109	GCF_000479265.1	RefSeq R89	unsure	USA	98.88	0.72	d__Bacteria;p__Fusobacteriota;c__Fusobacteriia;o__Fusobacteriales;f__Fusobacteriaceae;g__Fusobacterium;s__Fusobacterium nucleatum	d__Bacteria;p__Fusobacteria;c__Fusobacteriia;o__Fusobacteriales;f__Fusobacteriaceae;g__Fusobacterium;s__Fusobacterium nucleatum	2284954	27.0274	2123	83	NA	23_42	1	1
110	GCF_002202115.1	RefSeq R89	unsure	South Korea: Gwangju	100	0	d__Bacteria;p__Fusobacteriota;c__Fusobacteriia;o__Fusobacteriales;f__Fusobacteriaceae;g__Fusobacterium;s__Fusobacterium polymorphum	d__Bacteria;p__Fusobacteria;c__Fusobacteriia;o__Fusobacteriales;f__Fusobacteriaceae;g__Fusobacterium;s__Fusobacterium nucleatum	2635767	26.8665	2511	1	NA	23_74	1	0
111	GCF_001546395.1	RefSeq R89	unsure	USA	100	0	d__Bacteria;p__Fusobacteriota;c__Fusobacteriia;o__Fusobacteriales;f__Fusobacteriaceae;g__Fusobacterium_C;s__Fusobacterium_C gonidiaformans	d__Bacteria;p__Fusobacteria;c__Fusobacteriia;o__Fusobacteriales;f__Fusobacteriaceae;g__Fusobacterium;s__Fusobacterium equinum	1797919	32.5049	1780	117	NA	4_3	0	0
112	GCF_000158215.3	RefSeq R89	unsure	none	100	0.56	d__Bacteria;p__Fusobacteriota;c__Fusobacteriia;o__Fusobacteriales;f__Fusobacteriaceae;g__Fusobacterium;s__Fusobacterium periodonticum_D	d__Bacteria;p__Fusobacteria;c__Fusobacteriia;o__Fusobacteriales;f__Fusobacteriaceae;g__Fusobacterium;s__Fusobacterium periodonticum	2546312	28.0467	2347	61	NA	21_16	1	1
113	GCF_000479285.1	RefSeq R89	unsure	USA	100	0	d__Bacteria;p__Fusobacteriota;c__Fusobacteriia;o__Fusobacteriales;f__Fusobacteriaceae;g__Fusobacterium;s__Fusobacterium animalis	d__Bacteria;p__Fusobacteria;c__Fusobacteriia;o__Fusobacteriales;f__Fusobacteriaceae;g__Fusobacterium;s__Fusobacterium nucleatum	2429447	26.8118	2263	28	NA	23_15	1	1
114	GCF_000292935.1	RefSeq R89	unsure	South Korea	100	0	d__Bacteria;p__Fusobacteriota;c__Fusobacteriia;o__Fusobacteriales;f__Fusobacteriaceae;g__Fusobacterium;s__Fusobacterium hwasookii	d__Bacteria;p__Fusobacteria;c__Fusobacteriia;o__Fusobacteriales;f__Fusobacteriaceae;g__Fusobacterium;s__Fusobacterium hwasookii	2361684	26.9898	2222	30	NA	23_48	1	0
115	GCF_001433955.1	RefSeq R89	unsure	South Korea: Gwangju	100	0	d__Bacteria;p__Fusobacteriota;c__Fusobacteriia;o__Fusobacteriales;f__Fusobacteriaceae;g__Fusobacterium;s__Fusobacterium polymorphum	d__Bacteria;p__Fusobacteria;c__Fusobacteriia;o__Fusobacteriales;f__Fusobacteriaceae;g__Fusobacterium;s__Fusobacterium nucleatum	2622370	26.8285	2506	3	NA	23_68	1	0
116	GCF_003019295.1	RefSeq R89	unsure	none	100	0	d__Bacteria;p__Fusobacteriota;c__Fusobacteriia;o__Fusobacteriales;f__Fusobacteriaceae;g__Fusobacterium;s__Fusobacterium nucleatum	d__Bacteria;p__Fusobacteria;c__Fusobacteriia;o__Fusobacteriales;f__Fusobacteriaceae;g__Fusobacterium;s__Fusobacterium nucleatum	2180101	27.1401	2019	1	NA	23_41	1	1
117	GCF_001597565.1	RefSeq R89	unsure	Denmark	100	0	d__Bacteria;p__Fusobacteriota;c__Fusobacteriia;o__Fusobacteriales;f__Fusobacteriaceae;g__Fusobacterium_C;s__Fusobacterium_C necrophorum	d__Bacteria;p__Fusobacteria;c__Fusobacteriia;o__Fusobacteriales;f__Fusobacteriaceae;g__Fusobacterium;s__Fusobacterium necrophorum	2173839	35.1434	2132	47	NA	5_2	0	0
118	GCF_001597575.1	RefSeq R89	unsure	Denmark	100	0	d__Bacteria;p__Fusobacteriota;c__Fusobacteriia;o__Fusobacteriales;f__Fusobacteriaceae;g__Fusobacterium_C;s__Fusobacterium_C necrophorum	d__Bacteria;p__Fusobacteria;c__Fusobacteriia;o__Fusobacteriales;f__Fusobacteriaceae;g__Fusobacterium;s__Fusobacterium necrophorum	2201834	34.9896	2213	56	NA	5_2	0	0
119	GCF_000218655.1	RefSeq R89	unsure	none	100	0	d__Bacteria;p__Fusobacteriota;c__Fusobacteriia;o__Fusobacteriales;f__Fusobacteriaceae;g__Fusobacterium;s__Fusobacterium animalis	d__Bacteria;p__Fusobacteria;c__Fusobacteriia;o__Fusobacteriales;f__Fusobacteriaceae;g__Fusobacterium;s__Fusobacterium nucleatum	2721023	26.9393	2669	81	NA	23_30	1	1
120	GCF_000162235.2	RefSeq R89	unsure	none	100	0	d__Bacteria;p__Fusobacteriota;c__Fusobacteriia;o__Fusobacteriales;f__Fusobacteriaceae;g__Fusobacterium;s__Fusobacterium vincentii	d__Bacteria;p__Fusobacteria;c__Fusobacteriia;o__Fusobacteriales;f__Fusobacteriaceae;g__Fusobacterium;s__Fusobacterium nucleatum	2268272	27.1239	2161	1	NA	23_5	1	1
121	GCF_000524395.1	RefSeq R89	unsure	none	100	0	d__Bacteria;p__Fusobacteriota;c__Fusobacteriia;o__Fusobacteriales;f__Fusobacteriaceae;g__Fusobacterium;s__Fusobacterium polymorphum	d__Bacteria;p__Fusobacteria;c__Fusobacteriia;o__Fusobacteriales;f__Fusobacteriaceae;g__Fusobacterium;s__	2438137	26.733	2421	87	NA	23_50	1	1
122	GCA_002884895.1	RefSeq R89	unsure	USA	100	0	d__Bacteria;p__Fusobacteriota;c__Fusobacteriia;o__Fusobacteriales;f__Fusobacteriaceae;g__Fusobacterium;s__Fusobacterium animalis	d__Bacteria;p__Fusobacteria;c__Fusobacteriia;o__Fusobacteriales;f__Fusobacteriaceae;g__Fusobacterium;s__Fusobacterium nucleatum	2455598	26.8148	2289	30	NA	23_17	1	1
123	GCF_000523555.1	RefSeq R89	unsure	none	100	0	d__Bacteria;p__Fusobacteriota;c__Fusobacteriia;o__Fusobacteriales;f__Fusobacteriaceae;g__Fusobacterium;s__Fusobacterium polymorphum	d__Bacteria;p__Fusobacteria;c__Fusobacteriia;o__Fusobacteriales;f__Fusobacteriaceae;g__Fusobacterium;s__Fusobacterium nucleatum	2631404	26.8362	2449	28	NA	23_70	1	0
124	GCF_000622045.1	RefSeq R89	unsure	none	100	0	d__Bacteria;p__Fusobacteriota;c__Fusobacteriia;o__Fusobacteriales;f__Fusobacteriaceae;g__Fusobacterium_C;s__Fusobacterium_C necrophorum	d__Bacteria;p__Fusobacteria;c__Fusobacteriia;o__Fusobacteriales;f__Fusobacteriaceae;g__Fusobacterium;s__Fusobacterium necrophorum	2033981	35.1012	1887	21	NA	5_2	0	0
125	GCA_002211645.1	RefSeq R89	unsure	South Korea	100	0	d__Bacteria;p__Fusobacteriota;c__Fusobacteriia;o__Fusobacteriales;f__Fusobacteriaceae;g__Fusobacterium;s__Fusobacterium animalis	d__Bacteria;p__Fusobacteria;c__Fusobacteriia;o__Fusobacteriales;f__Fusobacteriaceae;g__Fusobacterium;s__Fusobacterium nucleatum	2322902	27.0037	2172	1	NA	23_15	1	1
126	GCF_000159915.2	RefSeq R89	unsure	none	98.83	1.12	d__Bacteria;p__Fusobacteriota;c__Fusobacteriia;o__Fusobacteriales;f__Fusobacteriaceae;g__Fusobacterium_A;s__Fusobacterium_A varium_B	d__Bacteria;p__Fusobacteria;c__Fusobacteriia;o__Fusobacteriales;f__Fusobacteriaceae;g__Fusobacterium;s__Fusobacterium varium	3299801	29.1756	3087	39	NA	12_2	2	0
127	GCF_000262225.1	RefSeq R89	unsure	none	100	0	d__Bacteria;p__Fusobacteriota;c__Fusobacteriia;o__Fusobacteriales;f__Fusobacteriaceae;g__Fusobacterium_C;s__Fusobacterium_C necrophorum	d__Bacteria;p__Fusobacteria;c__Fusobacteriia;o__Fusobacteriales;f__Fusobacteriaceae;g__Fusobacterium;s__Fusobacterium necrophorum	2110802	34.9175	2035	45	NA	5_3	0	0
128	GCF_003019655.1	RefSeq R89	unsure	none	100	1.12	d__Bacteria;p__Fusobacteriota;c__Fusobacteriia;o__Fusobacteriales;f__Fusobacteriaceae;g__Fusobacterium_A;s__Fusobacterium_A varium_B	d__Bacteria;p__Fusobacteria;c__Fusobacteriia;o__Fusobacteriales;f__Fusobacteriaceae;g__Fusobacterium;s__Fusobacterium varium	3346458	29.3459	3054	2	NA	12_2	3	0
129	GCF_001813745.1	RefSeq R89	unsure	USA	100	0	d__Bacteria;p__Fusobacteriota;c__Fusobacteriia;o__Fusobacteriales;f__Fusobacteriaceae;g__Fusobacterium;s__Fusobacterium animalis	d__Bacteria;p__Fusobacteria;c__Fusobacteriia;o__Fusobacteriales;f__Fusobacteriaceae;g__Fusobacterium;s__	2127181	26.7926	1969	134	NA	23_23	1	0
130	GCF_001597475.1	RefSeq R89	unsure	Denmark	100	0	d__Bacteria;p__Fusobacteriota;c__Fusobacteriia;o__Fusobacteriales;f__Fusobacteriaceae;g__Fusobacterium_C;s__Fusobacterium_C necrophorum	d__Bacteria;p__Fusobacteria;c__Fusobacteriia;o__Fusobacteriales;f__Fusobacteriaceae;g__Fusobacterium;s__Fusobacterium necrophorum	2139316	35.1652	2074	51	NA	5_2	0	0
131	GCF_002763925.1	RefSeq R89	unsure	South Korea: Gwangju	100	0.72	d__Bacteria;p__Fusobacteriota;c__Fusobacteriia;o__Fusobacteriales;f__Fusobacteriaceae;g__Fusobacterium;s__Fusobacterium periodonticum_C	d__Bacteria;p__Fusobacteria;c__Fusobacteriia;o__Fusobacteriales;f__Fusobacteriaceae;g__Fusobacterium;s__Fusobacterium periodonticum	2291059	28.2148	2193	1	NA	21_6	1	0
132	GCF_002763735.1	RefSeq R89	unsure	South Korea: Gwangju	100	0	d__Bacteria;p__Fusobacteriota;c__Fusobacteriia;o__Fusobacteriales;f__Fusobacteriaceae;g__Fusobacterium;s__Fusobacterium periodonticum_C	d__Bacteria;p__Fusobacteria;c__Fusobacteriia;o__Fusobacteriales;f__Fusobacteriaceae;g__Fusobacterium;s__Fusobacterium periodonticum	2324076	28.0714	2254	1	NA	21_7	1	0
133	GCF_003019785.1	RefSeq R89	unsure	none	100	0.16	d__Bacteria;p__Fusobacteriota;c__Fusobacteriia;o__Fusobacteriales;f__Fusobacteriaceae;g__Fusobacterium;s__Fusobacterium nucleatum	d__Bacteria;p__Fusobacteria;c__Fusobacteriia;o__Fusobacteriales;f__Fusobacteriaceae;g__Fusobacterium;s__Fusobacterium nucleatum	2299539	27.1809	2111	1	NA	23_39	1	1
134	GCF_002764055.1	RefSeq R89	unsure	South Korea: Gwangju	100	0	d__Bacteria;p__Fusobacteriota;c__Fusobacteriia;o__Fusobacteriales;f__Fusobacteriaceae;g__Fusobacterium;s__Fusobacterium vincentii	d__Bacteria;p__Fusobacteria;c__Fusobacteriia;o__Fusobacteriales;f__Fusobacteriaceae;g__Fusobacterium;s__Fusobacterium nucleatum	2087706	27.2096	1944	1	NA	23_9	1	1
135	GCF_001510735.1	RefSeq R89	unsure	South Korea: Gwangju	100	1.12	d__Bacteria;p__Fusobacteriota;c__Fusobacteriia;o__Fusobacteriales;f__Fusobacteriaceae;g__Fusobacterium;s__Fusobacterium nucleatum	d__Bacteria;p__Fusobacteria;c__Fusobacteriia;o__Fusobacteriales;f__Fusobacteriaceae;g__Fusobacterium;s__Fusobacterium nucleatum	2470675	27.0525	2410	4	NA	23_40	1	1
136	GCF_000158255.2	RefSeq R89	unsure	none	100	0	d__Bacteria;p__Fusobacteriota;c__Fusobacteriia;o__Fusobacteriales;f__Fusobacteriaceae;g__Fusobacterium;s__Fusobacterium vincentii	d__Bacteria;p__Fusobacteria;c__Fusobacteriia;o__Fusobacteriales;f__Fusobacteriaceae;g__Fusobacterium;s__Fusobacterium nucleatum	2271126	26.957	2161	24	NA	23_8	1	1
137	GCF_900095705.1	RefSeq R89	unsure	none	98.88	1.12	d__Bacteria;p__Fusobacteriota;c__Fusobacteriia;o__Fusobacteriales;f__Fusobacteriaceae;g__Fusobacterium;s__Fusobacterium massiliense	d__Bacteria;p__Fusobacteria;c__Fusobacteriia;o__Fusobacteriales;f__Fusobacteriaceae;g__Fusobacterium;s__Fusobacterium massiliense	1809170	27.3301	1650	7	NA	20_1	1	0
138	GCF_000158835.2	RefSeq R89	unsure	none	100	0	d__Bacteria;p__Fusobacteriota;c__Fusobacteriia;o__Fusobacteriales;f__Fusobacteriaceae;g__Fusobacterium_C;s__Fusobacterium_C gonidiaformans	d__Bacteria;p__Fusobacteria;c__Fusobacteriia;o__Fusobacteriales;f__Fusobacteriaceae;g__Fusobacterium;s__Fusobacterium gonidiaformans	1698329	32.4415	1657	24	NA	4_1	0	0
139	GCF_001597405.1	RefSeq R89	unsure	Denmark	100	0	d__Bacteria;p__Fusobacteriota;c__Fusobacteriia;o__Fusobacteriales;f__Fusobacteriaceae;g__Fusobacterium_C;s__Fusobacterium_C necrophorum	d__Bacteria;p__Fusobacteria;c__Fusobacteriia;o__Fusobacteriales;f__Fusobacteriaceae;g__Fusobacterium;s__Fusobacterium necrophorum	2339372	34.9754	2353	70	NA	5_2	0	0
140	GCF_000400875.1	RefSeq R89	unsure	none	100	0	d__Bacteria;p__Fusobacteriota;c__Fusobacteriia;o__Fusobacteriales;f__Fusobacteriaceae;g__Fusobacterium;s__Fusobacterium animalis	d__Bacteria;p__Fusobacteria;c__Fusobacteriia;o__Fusobacteriales;f__Fusobacteriaceae;g__Fusobacterium;s__Fusobacterium nucleatum	2275461	27.0895	2144	2	NA	23_26	1	1
141	GCF_002591515.1	RefSeq R89	unsure	South Korea: Gwangju	100	0	d__Bacteria;p__Fusobacteriota;c__Fusobacteriia;o__Fusobacteriales;f__Fusobacteriaceae;g__Fusobacterium;s__Fusobacterium polymorphum	d__Bacteria;p__Fusobacteria;c__Fusobacteriia;o__Fusobacteriales;f__Fusobacteriaceae;g__Fusobacterium;s__Fusobacterium nucleatum	2748372	26.6639	2696	38	NA	23_51	1	1
142	GCF_002763875.1	RefSeq R89	unsure	South Korea: Gwangju	99.44	0.56	d__Bacteria;p__Fusobacteriota;c__Fusobacteriia;o__Fusobacteriales;f__Fusobacteriaceae;g__Fusobacterium;s__Fusobacterium periodonticum_D	d__Bacteria;p__Fusobacteria;c__Fusobacteriia;o__Fusobacteriales;f__Fusobacteriaceae;g__Fusobacterium;s__Fusobacterium periodonticum	2477385	28.0629	2336	1	NA	21_58	1	1
143	GCF_000242995.2	RefSeq R89	unsure	USA	100	2.25	d__Bacteria;p__Fusobacteriota;c__Fusobacteriia;o__Fusobacteriales;f__Fusobacteriaceae;g__Fusobacterium_A;s__Fusobacterium_A ulcerans	d__Bacteria;p__Fusobacteria;c__Fusobacteriia;o__Fusobacteriales;f__Fusobacteriaceae;g__Fusobacterium;s__Fusobacterium ulcerans	3726942	30.3242	3545	38	NA	11_8	4	0
144	GCF_002762025.1	RefSeq R89	unsure	none	100	0	d__Bacteria;p__Fusobacteriota;c__Fusobacteriia;o__Fusobacteriales;f__Fusobacteriaceae;g__Fusobacterium_C;s__Fusobacterium_C necrophorum	d__Bacteria;p__Fusobacteria;c__Fusobacteriia;o__Fusobacteriales;f__Fusobacteriaceae;g__Fusobacterium;s__Fusobacterium necrophorum	2094200	35.224	1998	35	NA	5_2	0	0
145	GCF_000292975.1	RefSeq R89	unsure	none	100	0	d__Bacteria;p__Fusobacteriota;c__Fusobacteriia;o__Fusobacteriales;f__Fusobacteriaceae;g__Fusobacterium_C;s__Fusobacterium_C necrophorum	d__Bacteria;p__Fusobacteria;c__Fusobacteriia;o__Fusobacteriales;f__Fusobacteriaceae;g__Fusobacterium;s__Fusobacterium necrophorum	2166823	35.0532	2140	87	NA	5_2	0	0
146	GCF_001596475.1	RefSeq R89	unsure	Denmark	100	0	d__Bacteria;p__Fusobacteriota;c__Fusobacteriia;o__Fusobacteriales;f__Fusobacteriaceae;g__Fusobacterium_C;s__Fusobacterium_C necrophorum	d__Bacteria;p__Fusobacteria;c__Fusobacteriia;o__Fusobacteriales;f__Fusobacteriaceae;g__Fusobacterium;s__Fusobacterium necrophorum	2244163	35.0754	2255	62	NA	5_2	0	0
147	GCF_001597305.1	RefSeq R89	unsure	Denmark	100	0	d__Bacteria;p__Fusobacteriota;c__Fusobacteriia;o__Fusobacteriales;f__Fusobacteriaceae;g__Fusobacterium_C;s__Fusobacterium_C necrophorum	d__Bacteria;p__Fusobacteria;c__Fusobacteriia;o__Fusobacteriales;f__Fusobacteriaceae;g__Fusobacterium;s__Fusobacterium necrophorum	2231951	35.3294	2169	36	NA	5_2	0	0
148	GCF_002763595.1	RefSeq R89	unsure	South Korea: Gwangju	100	0.56	d__Bacteria;p__Fusobacteriota;c__Fusobacteriia;o__Fusobacteriales;f__Fusobacteriaceae;g__Fusobacterium;s__Fusobacterium periodonticum_C	d__Bacteria;p__Fusobacteria;c__Fusobacteriia;o__Fusobacteriales;f__Fusobacteriaceae;g__Fusobacterium;s__Fusobacterium periodonticum	2222370	28.2026	2096	1	NA	21_10	1	0
149	GCF_002204435.1	RefSeq R89	unsure	South Korea: Gwangju	100	0	d__Bacteria;p__Fusobacteriota;c__Fusobacteriia;o__Fusobacteriales;f__Fusobacteriaceae;g__Fusobacterium;s__Fusobacterium polymorphum	d__Bacteria;p__Fusobacteria;c__Fusobacteriia;o__Fusobacteriales;f__Fusobacteriaceae;g__Fusobacterium;s__Fusobacterium nucleatum	2523644	26.8242	2379	11	NA	23_58	1	1
150	GCF_000455885.1	RefSeq R89	unsure	South Korea	100	0	d__Bacteria;p__Fusobacteriota;c__Fusobacteriia;o__Fusobacteriales;f__Fusobacteriaceae;g__Fusobacterium;s__Fusobacterium hwasookii	d__Bacteria;p__Fusobacteria;c__Fusobacteriia;o__Fusobacteriales;f__Fusobacteriaceae;g__Fusobacterium;s__Fusobacterium hwasookii	2465770	26.9153	2349	118	NA	23_47	1	0
151	GCF_000158195.2	RefSeq R89	unsure	none	98.88	1.12	d__Bacteria;p__Fusobacteriota;c__Fusobacteriia;o__Fusobacteriales;f__Fusobacteriaceae;g__Fusobacterium_A;s__Fusobacterium_A mortiferum	d__Bacteria;p__Fusobacteria;c__Fusobacteriia;o__Fusobacteriales;f__Fusobacteriaceae;g__Fusobacterium;s__Fusobacterium mortiferum	2671036	29.0701	2615	44	NA	18_1	0	0
152	GCF_000479205.1	RefSeq R89	unsure	USA	98.88	2.25	d__Bacteria;p__Fusobacteriota;c__Fusobacteriia;o__Fusobacteriales;f__Fusobacteriaceae;g__Fusobacterium;s__Fusobacterium vincentii	d__Bacteria;p__Fusobacteria;c__Fusobacteriia;o__Fusobacteriales;f__Fusobacteriaceae;g__Fusobacterium;s__Fusobacterium nucleatum	2143762	27.0019	2008	76	NA	23_7	1	0
153	GCF_000799075.1	RefSeq R89	unsure	USA: Eugene	97.75	0	d__Bacteria;p__Fusobacteriota;c__Fusobacteriia;o__Fusobacteriales;f__Fusobacteriaceae;g__Cetobacterium_A;s__Cetobacterium_A sp000799075	d__Bacteria;p__Fusobacteria;c__Fusobacteriia;o__Fusobacteriales;f__Fusobacteriaceae;g__Cetobacterium;s__	2738314	30.0626	2626	126	NA	1_1	0	0
154	GCF_900167275.1	RefSeq R89	unsure	Scotland	100	1.12	d__Bacteria;p__Fusobacteriota;c__Fusobacteriia;o__Fusobacteriales;f__Fusobacteriaceae;g__Cetobacterium;s__Cetobacterium ceti	d__Bacteria;p__Fusobacteria;c__Fusobacteriia;o__Fusobacteriales;f__Fusobacteriaceae;g__Cetobacterium;s__Cetobacterium ceti	2580907	28.2422	2525	63	NA	25_0	0	0
155	GCF_000479045.1	RefSeq R89	unsure	USA: Chicago	98.88	0	d__Bacteria;p__Fusobacteriota;c__Fusobacteriia;o__Fusobacteriales;f__Fusobacteriaceae;g__Cetobacterium_A;s__Cetobacterium_A somerae	d__Bacteria;p__Fusobacteria;c__Fusobacteriia;o__Fusobacteriales;f__Fusobacteriaceae;g__Cetobacterium;s__Cetobacterium somerae	3068248	28.5818	2926	210	NA	2_3	0	0
156	GCF_000800875.1	RefSeq R89	unsure	USA: St. Louis; Missouri	97.75	0	d__Bacteria;p__Fusobacteriota;c__Fusobacteriia;o__Fusobacteriales;f__Fusobacteriaceae;g__Cetobacterium_A;s__Cetobacterium_A sp000799075	d__Bacteria;p__Fusobacteria;c__Fusobacteriia;o__Fusobacteriales;f__Fusobacteriaceae;g__Cetobacterium;s__	2754517	29.9759	2682	197	NA	1_1	0	0
157	M2-PK647A.12.metabat2102.contigs	yu	non-CRC control	Hong Kong	98.88	0	d__Bacteria;p__Fusobacteriota;c__Fusobacteriia;o__Fusobacteriales;f__Fusobacteriaceae;g__Cetobacterium_A;s__Cetobacterium_A somerae	NA	2884340	28.8	2761	74	1.80099	2_1	0	0
158	S4_049.77.metabat2121.contigs	coker	advanced_CRA	Hong Kong	96.63	0	d__Bacteria;p__Fusobacteriota;c__Fusobacteriia;o__Fusobacteriales;f__Fusobacteriaceae;g__Cetobacterium_A;s__Cetobacterium_A somerae	NA	1610470	29	1535	13	0.283582	2_2	0	0
159	S5_030.23.metabat2121.contigs	coker	late_CRC	Hong Kong	97.73	0	d__Bacteria;p__Fusobacteriota;c__Fusobacteriia;o__Fusobacteriales;f__Fusobacteriaceae;g__Fusobacterium;s__Fusobacterium animalis	NA	2323761	26.8	2279	124	0.74076	23_29	1	1
160	S5_031.27.metabat2121.contigs	coker	non-CRC control	Hong Kong	96.07	0	d__Bacteria;p__Fusobacteriota;c__Fusobacteriia;o__Fusobacteriales;f__Fusobacteriaceae;g__Fusobacterium;s__Fusobacterium nucleatum_E	NA	2418946	27	2357	134	0.271694	22_1	1	0
161	S6_018.46.metabat2121.contigs	coker	late_CRC	Hong Kong	100	0	d__Bacteria;p__Fusobacteriota;c__Fusobacteriia;o__Fusobacteriales;f__Fusobacteriaceae;g__Fusobacterium;s__GCF_000235465.1	NA	2208772	27.6	2175	73	0.362878	21_3	1	1
162	A10A.12.metabat2102.contigs	yu	late_CRC	Hong Kong	100	2.25	d__Bacteria;p__Fusobacteriota;c__Fusobacteriia;o__Fusobacteriales;f__Fusobacteriaceae;g__Fusobacterium_A;s__	NA	3284300	28.9	3096	78	1.32399	12_2	2	0
163	M2-PK017A.13.metabat2102.contigs	yu	early_CRC	Hong Kong	98.88	3.37	d__Bacteria;p__Fusobacteriota;c__Fusobacteriia;o__Fusobacteriales;f__Fusobacteriaceae;g__Fusobacterium_A;s__	NA	2579489	29.4	2451	99	2.42992	13_21	0	0
164	M118A.008_sub.contigs	yu	early_CRC	Hong Kong	98.88	2.25	d__Bacteria;p__Fusobacteriota;c__Fusobacteriia;o__Fusobacteriales;f__Fusobacteriaceae;g__Fusobacterium_A;s__	NA	2642899	29.2	2472	126	3.65647	13_15	0	0
165	534A.003.contigs	yu	non-CRC control	Hong Kong	97.75	2.25	d__Bacteria;p__Fusobacteriota;c__Fusobacteriia;o__Fusobacteriales;f__Fusobacteriaceae;g__Fusobacterium_A;s__	NA	2577134	29.2	2410	116	9.90359	13_2	0	0
166	S1_004.60.metabat2121.contigs	coker	non-CRC control	Hong Kong	100	1.24	d__Bacteria;p__Fusobacteriota;c__Fusobacteriia;o__Fusobacteriales;f__Fusobacteriaceae;g__Fusobacterium_A;s__	NA	2956407	29.1	2935	261	0.230345	12_2	2	0
167	M2-PK041A.10.metabat2102.contigs	yu	early_CRC	Hong Kong	100	2.25	d__Bacteria;p__Fusobacteriota;c__Fusobacteriia;o__Fusobacteriales;f__Fusobacteriaceae;g__Fusobacterium_A;s__	NA	3174759	29	2959	60	8.2669	12_2	1	0
168	S1_007.59.metabat2121.contigs	coker	non-CRC control	Hong Kong	100	1.12	d__Bacteria;p__Fusobacteriota;c__Fusobacteriia;o__Fusobacteriales;f__Fusobacteriaceae;g__Fusobacterium_A;s__	NA	3185191	29	2969	77	1.15148	12_2	1	0
169	MSC63A.014.contigs	yu	early_CRC	Hong Kong	98.88	2.3	d__Bacteria;p__Fusobacteriota;c__Fusobacteriia;o__Fusobacteriales;f__Fusobacteriaceae;g__Fusobacterium_A;s__	NA	2663624	29.3	2607	221	1.9023	13_14	0	0
170	S1_020.28.metabat2121.contigs	coker	non-CRC control	Hong Kong	97.75	1.12	d__Bacteria;p__Fusobacteriota;c__Fusobacteriia;o__Fusobacteriales;f__Fusobacteriaceae;g__Fusobacterium_A;s__	NA	3031449	29.2	2881	99	0.337077	12_2	0	0
171	S1_031.49.metabat2121.contigs	coker	non-CRC control	Hong Kong	98.63	2.41	d__Bacteria;p__Fusobacteriota;c__Fusobacteriia;o__Fusobacteriales;f__Fusobacteriaceae;g__Fusobacterium_A;s__	NA	3198642	29.7	3196	348	0.257008	11_1	2	0
172	S1_114.13.metabat2102.contigs	coker	non-CRC control	Hong Kong	100	2.25	d__Bacteria;p__Fusobacteriota;c__Fusobacteriia;o__Fusobacteriales;f__Fusobacteriaceae;g__Fusobacterium_A;s__	NA	3148653	29.2	2934	61	1.40611	12_2	0	0
173	S2_010.29.metabat2121.contigs	coker	non_advanced_CRA	Hong Kong	93.21	2.25	d__Bacteria;p__Fusobacteriota;c__Fusobacteriia;o__Fusobacteriales;f__Fusobacteriaceae;g__Fusobacterium_A;s__	NA	2864202	29	2879	340	0.248771	12_2	1	0
174	S3_026.38.metabat2121.contigs	coker	advanced_CRA	Hong Kong	100	1.12	d__Bacteria;p__Fusobacteriota;c__Fusobacteriia;o__Fusobacteriales;f__Fusobacteriaceae;g__Fusobacterium_A;s__	NA	3011880	29.1	2804	67	1.39299	12_2	1	0
175	S2_057_merged.12.metabat2121.contigs	coker	non_advanced_CRA	Hong Kong	96.63	1.12	d__Bacteria;p__Fusobacteriota;c__Fusobacteriia;o__Fusobacteriales;f__Fusobacteriaceae;g__Fusobacterium_A;s__	NA	3135015	29	3282	363	2.40511	12_2	0	0
176	S3_045.023.contigs	coker	advanced_CRA	Hong Kong	97.75	3.37	d__Bacteria;p__Fusobacteriota;c__Fusobacteriia;o__Fusobacteriales;f__Fusobacteriaceae;g__Fusobacterium_A;s__	NA	2199147	29.6	2043	100	0.694499	13_11	0	0
177	S3_022.23.metabat2102.contigs	coker	advanced_CRA	Hong Kong	98.88	2.25	d__Bacteria;p__Fusobacteriota;c__Fusobacteriia;o__Fusobacteriales;f__Fusobacteriaceae;g__Fusobacterium_A;s__	NA	2392525	29.5	2310	99	2.42125	13_14	0	0
178	S4_015.035.contigs	coker	advanced_CRA	Hong Kong	100	3.37	d__Bacteria;p__Fusobacteriota;c__Fusobacteriia;o__Fusobacteriales;f__Fusobacteriaceae;g__Fusobacterium_A;s__	NA	3276496	29	3095	153	0.376786	12_2	1	0
179	S4_014.12.metabat2102.contigs	coker	advanced_CRA	Hong Kong	100	2.25	d__Bacteria;p__Fusobacteriota;c__Fusobacteriia;o__Fusobacteriales;f__Fusobacteriaceae;g__Fusobacterium_A;s__	NA	3208406	28.9	2994	85	0.797605	12_2	1	0
180	S3_103.40.metabat2121.contigs	coker	non_advanced_CRA	Hong Kong	100	0	d__Bacteria;p__Fusobacteriota;c__Fusobacteriia;o__Fusobacteriales;f__Fusobacteriaceae;g__Fusobacterium_A;s__	NA	3056008	29	2997	178	0.495996	12_2	1	0
181	S3_102.75.metabat2121.contigs	coker	advanced_CRA	Hong Kong	97.75	2.81	d__Bacteria;p__Fusobacteriota;c__Fusobacteriia;o__Fusobacteriales;f__Fusobacteriaceae;g__Fusobacterium_A;s__	NA	2933673	28.9	3003	363	0.773894	12_2	0	0
182	S4_003.29.metabat2121.contigs	coker	advanced_CRA	Hong Kong	95.51	4.54	d__Bacteria;p__Fusobacteriota;c__Fusobacteriia;o__Fusobacteriales;f__Fusobacteriaceae;g__Fusobacterium_A;s__	NA	2006198	29.7	2023	260	0.19655	13_14	0	0
183	S4_015.30.metabat2102.contigs	coker	advanced_CRA	Hong Kong	98.88	1.12	d__Bacteria;p__Fusobacteriota;c__Fusobacteriia;o__Fusobacteriales;f__Fusobacteriaceae;g__Fusobacterium_A;s__	NA	2129201	29.6	2024	70	1.15048	17_2	0	0
184	S5_031.19.metabat2102.contigs	coker	non-CRC control	Hong Kong	100	2.25	d__Bacteria;p__Fusobacteriota;c__Fusobacteriia;o__Fusobacteriales;f__Fusobacteriaceae;g__Fusobacterium_A;s__	NA	3290800	28.9	3104	79	1.37104	12_2	1	0
185	S4_034_merged.10.metabat2102.contigs	coker	advanced_CRA	Hong Kong	100	2.25	d__Bacteria;p__Fusobacteriota;c__Fusobacteriia;o__Fusobacteriales;f__Fusobacteriaceae;g__Fusobacterium_A;s__	NA	3192026	29	2963	68	9.06848	12_2	1	0
186	S5_030.42.metabat2121.contigs	coker	late_CRC	Hong Kong	100	1.12	d__Bacteria;p__Fusobacteriota;c__Fusobacteriia;o__Fusobacteriales;f__Fusobacteriaceae;g__Fusobacterium_A;s__	NA	3073113	29.1	2919	59	1.71188	12_2	1	0
187	S5_024.11.metabat2102.contigs	coker	non_advanced_CRA	Hong Kong	100	2.25	d__Bacteria;p__Fusobacteriota;c__Fusobacteriia;o__Fusobacteriales;f__Fusobacteriaceae;g__Fusobacterium_A;s__	NA	3285984	29	3065	81	4.69353	12_2	1	0
188	S5_032.27.metabat2102.contigs	coker	early_CRC	Hong Kong	98.88	2.3	d__Bacteria;p__Fusobacteriota;c__Fusobacteriia;o__Fusobacteriales;f__Fusobacteriaceae;g__Fusobacterium_A;s__	NA	2604996	29.2	2529	112	0.704847	13_14	0	0
189	S5_052.010.contigs	coker	early_CRC	Hong Kong	98.88	2.25	d__Bacteria;p__Fusobacteriota;c__Fusobacteriia;o__Fusobacteriales;f__Fusobacteriaceae;g__Fusobacterium_A;s__	NA	2604315	29.2	2446	142	2.78867	13_15	0	0
190	S5_064.14.metabat2102.contigs	coker	early_CRC	Hong Kong	100	2.25	d__Bacteria;p__Fusobacteriota;c__Fusobacteriia;o__Fusobacteriales;f__Fusobacteriaceae;g__Fusobacterium_A;s__	NA	3209399	29	2977	75	1.32648	12_2	0	0
191	S6_026.15.metabat2102.contigs	coker	early_CRC	Hong Kong	100	1.12	d__Bacteria;p__Fusobacteriota;c__Fusobacteriia;o__Fusobacteriales;f__Fusobacteriaceae;g__Fusobacterium_A;s__	NA	3182843	29.1	3015	65	1.49133	12_2	1	0
192	S6_033.11.metabat2102.contigs	coker	non_advanced_CRA	Hong Kong	100	2.25	d__Bacteria;p__Fusobacteriota;c__Fusobacteriia;o__Fusobacteriales;f__Fusobacteriaceae;g__Fusobacterium_A;s__	NA	3268265	29	3047	77	4.18886	12_2	1	0
193	S5_104.33.metabat2121.contigs	coker	late_CRC	Hong Kong	100	2.25	d__Bacteria;p__Fusobacteriota;c__Fusobacteriia;o__Fusobacteriales;f__Fusobacteriaceae;g__Fusobacterium_A;s__	NA	3406178	28.8	3298	118	0.602607	12_2	2	0
194	S5_086.33.metabat2121.contigs	coker	early_CRC	Hong Kong	100	1.12	d__Bacteria;p__Fusobacteriota;c__Fusobacteriia;o__Fusobacteriales;f__Fusobacteriaceae;g__Fusobacterium_A;s__	NA	2924704	29.1	2953	287	0.305572	12_2	1	0
195	S6_014.12.metabat2102.contigs	coker	late_CRC	Hong Kong	100	2.25	d__Bacteria;p__Fusobacteriota;c__Fusobacteriia;o__Fusobacteriales;f__Fusobacteriaceae;g__Fusobacterium_A;s__	NA	3111654	29	2875	90	0.760913	12_2	2	0
196	S6_021.28.metabat2102.contigs	coker	late_CRC	Hong Kong	98.88	1.12	d__Bacteria;p__Fusobacteriota;c__Fusobacteriia;o__Fusobacteriales;f__Fusobacteriaceae;g__Fusobacterium_A;s__	NA	2587803	30.6	2451	39	4.47642	16_1	0	0
197	M2-PK002A.016.contigs	yu	early_CRC	Hong Kong	98.88	1.12	d__Bacteria;p__Fusobacteriota;c__Fusobacteriia;o__Fusobacteriales;f__Fusobacteriaceae;g__Fusobacterium_A;s__Fusobacterium_A mortiferum	NA	2693310	29	2552	82	3.53197	18_1	0	0
198	M116A.17.metabat2102.contigs	yu	early_CRC	Hong Kong	98.88	2.25	d__Bacteria;p__Fusobacteriota;c__Fusobacteriia;o__Fusobacteriales;f__Fusobacteriaceae;g__Fusobacterium_A;s__Fusobacterium_A mortiferum	NA	2609194	29.1	2585	134	0.908224	18_1	0	0
199	M2-PK018A.10.metabat2102.contigs	yu	early_CRC	Hong Kong	97.75	0	d__Bacteria;p__Fusobacteriota;c__Fusobacteriia;o__Fusobacteriales;f__Fusobacteriaceae;g__Fusobacterium_A;s__Fusobacterium_A mortiferum	NA	2476320	29.2	2417	158	0.629731	18_1	0	0
200	S1_009.018.contigs	coker	non-CRC control	Hong Kong	98.88	1.12	d__Bacteria;p__Fusobacteriota;c__Fusobacteriia;o__Fusobacteriales;f__Fusobacteriaceae;g__Fusobacterium_A;s__Fusobacterium_A mortiferum	NA	2627880	29	2486	83	1.41683	18_1	0	0
201	S1_013.17.metabat2102.contigs	coker	non-CRC control	Hong Kong	98.88	1.12	d__Bacteria;p__Fusobacteriota;c__Fusobacteriia;o__Fusobacteriales;f__Fusobacteriaceae;g__Fusobacterium_A;s__Fusobacterium_A mortiferum	NA	2517965	29.1	2361	55	1.25463	18_1	0	0
202	M2-PK083B.28.metabat2102.contigs	yu	late_CRC	Hong Kong	90.45	2.25	d__Bacteria;p__Fusobacteriota;c__Fusobacteriia;o__Fusobacteriales;f__Fusobacteriaceae;g__Fusobacterium_A;s__Fusobacterium_A mortiferum	NA	1998554	29.6	2008	342	0.357985	18_1	0	0
203	M2-PK649A.9.metabat2102.contigs	yu	non-CRC control	Hong Kong	98.88	1.12	d__Bacteria;p__Fusobacteriota;c__Fusobacteriia;o__Fusobacteriales;f__Fusobacteriaceae;g__Fusobacterium_A;s__Fusobacterium_A mortiferum	NA	2580779	29	2458	70	1.19554	18_1	0	0
204	S1_095.28.metabat2102.contigs	coker	non-CRC control	Hong Kong	98.88	1.12	d__Bacteria;p__Fusobacteriota;c__Fusobacteriia;o__Fusobacteriales;f__Fusobacteriaceae;g__Fusobacterium_A;s__Fusobacterium_A mortiferum	NA	2636960	28.9	2514	78	0.435717	18_1	0	0
205	S1_045.025.contigs	coker	non-CRC control	Hong Kong	98.88	1.12	d__Bacteria;p__Fusobacteriota;c__Fusobacteriia;o__Fusobacteriales;f__Fusobacteriaceae;g__Fusobacterium_A;s__Fusobacterium_A mortiferum	NA	2640638	29	2598	91	0.471402	18_1	0	0
206	S1_029.15.metabat2102.contigs	coker	non-CRC control	Hong Kong	98.88	1.12	d__Bacteria;p__Fusobacteriota;c__Fusobacteriia;o__Fusobacteriales;f__Fusobacteriaceae;g__Fusobacterium_A;s__Fusobacterium_A mortiferum	NA	2586449	29	2510	55	1.04761	18_1	0	0
207	S2_009.64.metabat2121.contigs	coker	non_advanced_CRA	Hong Kong	98.88	1.12	d__Bacteria;p__Fusobacteriota;c__Fusobacteriia;o__Fusobacteriales;f__Fusobacteriaceae;g__Fusobacterium_A;s__Fusobacterium_A mortiferum	NA	2478285	29.1	2394	126	0.375681	18_1	0	0
208	S1_113.015.contigs	coker	non-CRC control	Hong Kong	98.88	1.12	d__Bacteria;p__Fusobacteriota;c__Fusobacteriia;o__Fusobacteriales;f__Fusobacteriaceae;g__Fusobacterium_A;s__Fusobacterium_A mortiferum	NA	2519542	29.1	2415	49	1.21954	18_1	0	0
209	S2_016_merged.012.contigs	coker	non_advanced_CRA	Hong Kong	98.88	1.12	d__Bacteria;p__Fusobacteriota;c__Fusobacteriia;o__Fusobacteriales;f__Fusobacteriaceae;g__Fusobacterium_A;s__Fusobacterium_A mortiferum	NA	2813495	28.8	2749	89	2.18813	18_1	0	0
210	S2_036.26.metabat2102.contigs	coker	non-CRC control	Hong Kong	98.88	1.12	d__Bacteria;p__Fusobacteriota;c__Fusobacteriia;o__Fusobacteriales;f__Fusobacteriaceae;g__Fusobacterium_A;s__Fusobacterium_A mortiferum	NA	2519711	29	2428	104	0.349495	18_1	0	0
211	S2_018.35.metabat2121.contigs	coker	non-CRC control	Hong Kong	98.88	1.12	d__Bacteria;p__Fusobacteriota;c__Fusobacteriia;o__Fusobacteriales;f__Fusobacteriaceae;g__Fusobacterium_A;s__Fusobacterium_A mortiferum	NA	2564005	29	2453	89	0.437818	18_1	0	0
212	S3_036.31.metabat2102.contigs	coker	advanced_CRA	Hong Kong	98.88	1.12	d__Bacteria;p__Fusobacteriota;c__Fusobacteriia;o__Fusobacteriales;f__Fusobacteriaceae;g__Fusobacterium_A;s__Fusobacterium_A mortiferum	NA	2603460	29.1	2496	67	1.49145	18_1	0	0
213	S2_062_merged.034.contigs	coker	advanced_CRA	Hong Kong	100	1.28	d__Bacteria;p__Fusobacteriota;c__Fusobacteriia;o__Fusobacteriales;f__Fusobacteriaceae;g__Fusobacterium_A;s__Fusobacterium_A mortiferum	NA	2719704	28.9	2777	275	0.524338	18_1	0	0
214	S3_037.24.metabat2102.contigs	coker	advanced_CRA	Hong Kong	97.75	1.12	d__Bacteria;p__Fusobacteriota;c__Fusobacteriia;o__Fusobacteriales;f__Fusobacteriaceae;g__Fusobacterium_A;s__Fusobacterium_A mortiferum	NA	2525462	29	2523	196	2.25481	18_1	0	0
215	S3_010.44.metabat2102.contigs	coker	advanced_CRA	Hong Kong	92.13	1.12	d__Bacteria;p__Fusobacteriota;c__Fusobacteriia;o__Fusobacteriales;f__Fusobacteriaceae;g__Fusobacterium_A;s__Fusobacterium_A mortiferum	NA	2090587	29.3	2011	107	0.277562	18_1	0	0
216	S3_048.014.contigs	coker	non_advanced_CRA	Hong Kong	98.88	1.44	d__Bacteria;p__Fusobacteriota;c__Fusobacteriia;o__Fusobacteriales;f__Fusobacteriaceae;g__Fusobacterium_A;s__Fusobacterium_A mortiferum	NA	3046794	29.1	3083	81	2.47572	18_1	0	0
217	S4_019.20.metabat2102.contigs	coker	advanced_CRA	Hong Kong	98.88	1.12	d__Bacteria;p__Fusobacteriota;c__Fusobacteriia;o__Fusobacteriales;f__Fusobacteriaceae;g__Fusobacterium_A;s__Fusobacterium_A mortiferum	NA	2598528	29.1	2493	72	0.495299	18_1	0	0
218	S3_096.25.metabat2121.contigs	coker	non-CRC control	Hong Kong	97.75	1.12	d__Bacteria;p__Fusobacteriota;c__Fusobacteriia;o__Fusobacteriales;f__Fusobacteriaceae;g__Fusobacterium_A;s__Fusobacterium_A mortiferum	NA	2643380	28.9	2603	144	0.230888	18_1	0	0
219	S3_086.021.contigs	coker	advanced_CRA	Hong Kong	95.35	1.12	d__Bacteria;p__Fusobacteriota;c__Fusobacteriia;o__Fusobacteriales;f__Fusobacteriaceae;g__Fusobacterium_A;s__Fusobacterium_A mortiferum	NA	2579634	29	2471	82	0.985909	18_1	0	0
220	S3_081.9.metabat2102.contigs	coker	non_advanced_CRA	Hong Kong	98.88	1.12	d__Bacteria;p__Fusobacteriota;c__Fusobacteriia;o__Fusobacteriales;f__Fusobacteriaceae;g__Fusobacterium_A;s__Fusobacterium_A mortiferum	NA	2624098	28.8	2473	58	4.90702	18_1	0	0
221	S3_104.20.metabat2102.contigs	coker	advanced_CRA	Hong Kong	98.88	2.25	d__Bacteria;p__Fusobacteriota;c__Fusobacteriia;o__Fusobacteriales;f__Fusobacteriaceae;g__Fusobacterium_A;s__Fusobacterium_A mortiferum	NA	2691792	29.1	2613	80	2.91258	18_1	0	0
222	S4_049.19.metabat2102_sub.contigs	coker	advanced_CRA	Hong Kong	98.88	3.37	d__Bacteria;p__Fusobacteriota;c__Fusobacteriia;o__Fusobacteriales;f__Fusobacteriaceae;g__Fusobacterium_A;s__Fusobacterium_A mortiferum	NA	2917482	28.7	2804	65	1.01007	18_1	0	0
223	S5_021.19.metabat2102.contigs	coker	early_CRC	Hong Kong	98.88	1.12	d__Bacteria;p__Fusobacteriota;c__Fusobacteriia;o__Fusobacteriales;f__Fusobacteriaceae;g__Fusobacterium_A;s__Fusobacterium_A mortiferum	NA	2644740	29	2548	49	0.974442	18_1	0	0
224	S4_037.41.metabat2121.contigs	coker	advanced_CRA	Hong Kong	92.13	1.12	d__Bacteria;p__Fusobacteriota;c__Fusobacteriia;o__Fusobacteriales;f__Fusobacteriaceae;g__Fusobacterium_A;s__Fusobacterium_A mortiferum	NA	2414484	29	2436	233	0.193124	18_1	0	0
225	S4_038.16.metabat2102_sub.contigs	coker	advanced_CRA	Hong Kong	92.7	3.37	d__Bacteria;p__Fusobacteriota;c__Fusobacteriia;o__Fusobacteriales;f__Fusobacteriaceae;g__Fusobacterium_A;s__Fusobacterium_A mortiferum	NA	2604347	28.8	2749	297	0.593487	18_1	0	0
226	S4_051.18.metabat2102.contigs	coker	non_advanced_CRA	Hong Kong	98.88	1.12	d__Bacteria;p__Fusobacteriota;c__Fusobacteriia;o__Fusobacteriales;f__Fusobacteriaceae;g__Fusobacterium_A;s__Fusobacterium_A mortiferum	NA	2586105	29.1	2462	49	2.6183	18_1	0	0
227	S5_008.011.contigs	coker	late_CRC	Hong Kong	98.88	1.12	d__Bacteria;p__Fusobacteriota;c__Fusobacteriia;o__Fusobacteriales;f__Fusobacteriaceae;g__Fusobacterium_A;s__Fusobacterium_A mortiferum	NA	2686691	29.1	2528	66	4.61747	18_1	0	0
228	S5_040.1.metabat2121.contigs	coker	non-CRC control	Hong Kong	96.63	1.12	d__Bacteria;p__Fusobacteriota;c__Fusobacteriia;o__Fusobacteriales;f__Fusobacteriaceae;g__Fusobacterium_A;s__Fusobacterium_A mortiferum	NA	2551927	29	2495	144	0.31792	18_1	0	0
229	S5_011.045.contigs	coker	early_CRC	Hong Kong	98.88	3.37	d__Bacteria;p__Fusobacteriota;c__Fusobacteriia;o__Fusobacteriales;f__Fusobacteriaceae;g__Fusobacterium_A;s__Fusobacterium_A mortiferum	NA	2568766	29.1	2477	117	0.393424	18_1	0	0
230	S6_029.020.contigs	coker	late_CRC	Hong Kong	98.88	1.56	d__Bacteria;p__Fusobacteriota;c__Fusobacteriia;o__Fusobacteriales;f__Fusobacteriaceae;g__Fusobacterium_A;s__Fusobacterium_A mortiferum	NA	3233236	29	3286	112	2.00136	18_1	0	0
231	S6_008.21.metabat2102.contigs	coker	early_CRC	Hong Kong	98.88	1.12	d__Bacteria;p__Fusobacteriota;c__Fusobacteriia;o__Fusobacteriales;f__Fusobacteriaceae;g__Fusobacterium_A;s__Fusobacterium_A mortiferum	NA	2553931	29.1	2431	71	0.793419	18_1	0	0
232	S6_024.21.metabat2102.contigs	coker	early_CRC	Hong Kong	98.88	1.12	d__Bacteria;p__Fusobacteriota;c__Fusobacteriia;o__Fusobacteriales;f__Fusobacteriaceae;g__Fusobacterium_A;s__Fusobacterium_A mortiferum	NA	2654719	28.9	2610	133	0.381387	18_1	0	0
233	S5_084_merged.27.metabat2102.contigs	coker	late_CRC	Hong Kong	98.88	1.12	d__Bacteria;p__Fusobacteriota;c__Fusobacteriia;o__Fusobacteriales;f__Fusobacteriaceae;g__Fusobacterium_A;s__Fusobacterium_A mortiferum	NA	2657763	28.9	2532	59	1.8285	18_1	0	0
234	516A.014.contigs	yu	non-CRC control	Hong Kong	100	2.25	d__Bacteria;p__Fusobacteriota;c__Fusobacteriia;o__Fusobacteriales;f__Fusobacteriaceae;g__Fusobacterium_A;s__Fusobacterium_A ulcerans	NA	3711231	30.5	3554	103	1.4117	11_6	4	0
235	M89A.4.metabat2121.contigs	yu	late_CRC	Hong Kong	100	2.25	d__Bacteria;p__Fusobacteriota;c__Fusobacteriia;o__Fusobacteriales;f__Fusobacteriaceae;g__Fusobacterium_A;s__Fusobacterium_A ulcerans	NA	3314149	30.4	3171	82	1.07853	11_6	2	0
236	S3_021.31.metabat2121.contigs	coker	advanced_CRA	Hong Kong	100	2.25	d__Bacteria;p__Fusobacteriota;c__Fusobacteriia;o__Fusobacteriales;f__Fusobacteriaceae;g__Fusobacterium_A;s__Fusobacterium_A ulcerans	NA	3636370	30.2	3496	84	2.36033	11_9	4	0
237	S4_002.41.metabat2121.contigs	coker	advanced_CRA	Hong Kong	100	2.25	d__Bacteria;p__Fusobacteriota;c__Fusobacteriia;o__Fusobacteriales;f__Fusobacteriaceae;g__Fusobacterium_A;s__Fusobacterium_A ulcerans	NA	3513841	30.3	3430	147	0.540267	11_9	4	0
238	S4_041.4.metabat2102_sub.contigs	coker	non_advanced_CRA	Hong Kong	90.16	1.69	d__Bacteria;p__Fusobacteriota;c__Fusobacteriia;o__Fusobacteriales;f__Fusobacteriaceae;g__Fusobacterium_A;s__Fusobacterium_A ulcerans	NA	2717893	31	2824	437	0.439412	11_7	2	0
239	S5_046.32.metabat2121_sub.contigs	coker	non-CRC control	Hong Kong	93.26	2.25	d__Bacteria;p__Fusobacteriota;c__Fusobacteriia;o__Fusobacteriales;f__Fusobacteriaceae;g__Fusobacterium_A;s__Fusobacterium_A ulcerans	NA	2579731	30.5	2791	401	0.261872	11_8	3	0
240	S5_041.010.contigs	coker	non-CRC control	Hong Kong	100	2.25	d__Bacteria;p__Fusobacteriota;c__Fusobacteriia;o__Fusobacteriales;f__Fusobacteriaceae;g__Fusobacterium_A;s__Fusobacterium_A ulcerans	NA	3381239	30.4	3229	104	2.71265	11_6	2	0
241	S6_025.31.metabat2121.contigs	coker	early_CRC	Hong Kong	100	2.25	d__Bacteria;p__Fusobacteriota;c__Fusobacteriia;o__Fusobacteriales;f__Fusobacteriaceae;g__Fusobacterium_A;s__Fusobacterium_A ulcerans	NA	3529689	30.3	3499	90	0.77731	11_3	4	0
242	S6_007.9.metabat2102.contigs	coker	early_CRC	Hong Kong	100	2.25	d__Bacteria;p__Fusobacteriota;c__Fusobacteriia;o__Fusobacteriales;f__Fusobacteriaceae;g__Fusobacterium_A;s__Fusobacterium_A ulcerans	NA	3546501	30.3	3493	87	2.07966	11_3	4	0
243	ANS1119.36.metabat2121.contigs	yu	non-CRC control	Hong Kong	92.88	2.25	d__Bacteria;p__Fusobacteriota;c__Fusobacteriia;o__Fusobacteriales;f__Fusobacteriaceae;g__Fusobacterium_A;s__Fusobacterium_A varium_A	NA	2948486	29.2	2945	389	0.944462	12_1	4	0
244	534A.23.metabat2102_sub.contigs	yu	non-CRC control	Hong Kong	98.87	0	d__Bacteria;p__Fusobacteriota;c__Fusobacteriia;o__Fusobacteriales;f__Fusobacteriaceae;g__Fusobacterium_B;s__	NA	2260018	29.9	2205	183	0.270714	10_1	0	0
245	M118A.12.metabat2102.contigs	yu	early_CRC	Hong Kong	99.44	1.12	d__Bacteria;p__Fusobacteriota;c__Fusobacteriia;o__Fusobacteriales;f__Fusobacteriaceae;g__Fusobacterium_B;s__	NA	2334398	31.1	2165	203	0.651092	6_2	0	0
246	S1_021.21.metabat2102.contigs	coker	non-CRC control	Hong Kong	97.75	0	d__Bacteria;p__Fusobacteriota;c__Fusobacteriia;o__Fusobacteriales;f__Fusobacteriaceae;g__Fusobacterium_B;s__	NA	2181296	30.4	2165	103	3.38263	10_6	0	0
247	S2_055.22.metabat2102.contigs	coker	non_advanced_CRA	Hong Kong	100	0	d__Bacteria;p__Fusobacteriota;c__Fusobacteriia;o__Fusobacteriales;f__Fusobacteriaceae;g__Fusobacterium_B;s__	NA	2358797	29.9	2182	46	3.92186	10_2	0	0
248	S3_031.44.metabat2102.contigs	coker	non_advanced_CRA	Hong Kong	98.88	0	d__Bacteria;p__Fusobacteriota;c__Fusobacteriia;o__Fusobacteriales;f__Fusobacteriaceae;g__Fusobacterium_B;s__	NA	2063181	29.1	1924	29	0.365092	9_1	0	0
249	S4_054.58.metabat2102.contigs	coker	advanced_CRA	Hong Kong	92.7	0.05	d__Bacteria;p__Fusobacteriota;c__Fusobacteriia;o__Fusobacteriales;f__Fusobacteriaceae;g__Fusobacterium_B;s__	NA	2086460	30.1	2099	235	0.0526941	10_4	0	0
250	S4_044.17.metabat2121.contigs	coker	advanced_CRA	Hong Kong	100	0	d__Bacteria;p__Fusobacteriota;c__Fusobacteriia;o__Fusobacteriales;f__Fusobacteriaceae;g__Fusobacterium_B;s__	NA	2147490	30.2	1972	114	0.247047	10_5	0	0
251	S5_045.25.metabat2102_sub.contigs	coker	late_CRC	Hong Kong	100	1.12	d__Bacteria;p__Fusobacteriota;c__Fusobacteriia;o__Fusobacteriales;f__Fusobacteriaceae;g__Fusobacterium_B;s__	NA	2418382	31	2226	65	1.26095	6_2	0	0
252	S5_052.64.metabat2121.contigs	coker	early_CRC	Hong Kong	100	1.12	d__Bacteria;p__Fusobacteriota;c__Fusobacteriia;o__Fusobacteriales;f__Fusobacteriaceae;g__Fusobacterium_B;s__	NA	2349169	31.1	2142	72	0.609867	6_2	0	0
253	S5_082.99.metabat2121.contigs	coker	late_CRC	Hong Kong	96.63	1.12	d__Bacteria;p__Fusobacteriota;c__Fusobacteriia;o__Fusobacteriales;f__Fusobacteriaceae;g__Fusobacterium_C;s__Fusobacterium_C gonidiaformans	NA	1593813	32.5	1670	140	0.153136	4_3	0	0
254	PGHST0005.006.contigs	HKGutMicMap	non-CRC	Hong Kong	100	1.12	d__Bacteria;p__Fusobacteriota;c__Fusobacteriia;o__Fusobacteriales;f__Fusobacteriaceae;g__Fusobacterium_B;s__	NA	2099034	30.4	1944	65	7.98965	7_1	0	0
255	PGHST0005.12.contigs	HKGutMicMap	non-CRC	Hong Kong	97.75	1.12	d__Bacteria;p__Fusobacteriota;c__Fusobacteriia;o__Fusobacteriales;f__Fusobacteriaceae;g__Fusobacterium_A;s__Fusobacterium_A mortiferum	NA	2403024	29.1	2334	132	0.541775	18_1	0	0
256	PGHST0009.021.contigs	HKGutMicMap	non-CRC	Hong Kong	98.88	1.12	d__Bacteria;p__Fusobacteriota;c__Fusobacteriia;o__Fusobacteriales;f__Fusobacteriaceae;g__Fusobacterium_A;s__Fusobacterium_A mortiferum	NA	2625747	29.1	2582	80	0.961461	18_1	0	0
257	PGHST0016.009.contigs	HKGutMicMap	non-CRC	Hong Kong	98.88	1.12	d__Bacteria;p__Fusobacteriota;c__Fusobacteriia;o__Fusobacteriales;f__Fusobacteriaceae;g__Fusobacterium_A;s__Fusobacterium_A mortiferum	NA	2684536	29.1	2601	87	4.3222	18_1	0	0
258	PGHST0030.025.contigs	HKGutMicMap	non-CRC	Hong Kong	98.88	1.12	d__Bacteria;p__Fusobacteriota;c__Fusobacteriia;o__Fusobacteriales;f__Fusobacteriaceae;g__Fusobacterium_A;s__Fusobacterium_A mortiferum	NA	2845024	29	2719	181	0.504694	18_1	0	0
259	PGHST0032.10.contigs	HKGutMicMap	non-CRC	Hong Kong	100	2.25	d__Bacteria;p__Fusobacteriota;c__Fusobacteriia;o__Fusobacteriales;f__Fusobacteriaceae;g__Fusobacterium_A;s__	NA	3192084	29	2948	86	2.92052	12_2	1	0
260	PGHST0050.31.contigs	HKGutMicMap	non-CRC	Hong Kong	100	1.12	d__Bacteria;p__Fusobacteriota;c__Fusobacteriia;o__Fusobacteriales;f__Fusobacteriaceae;g__Fusobacterium_B;s__	NA	2003059	30.4	1858	44	0.743263	7_2	0	0
261	PGHST0057.006.contigs	HKGutMicMap	non-CRC	Hong Kong	98.88	1.12	d__Bacteria;p__Fusobacteriota;c__Fusobacteriia;o__Fusobacteriales;f__Fusobacteriaceae;g__Fusobacterium_A;s__Fusobacterium_A mortiferum	NA	2693147	29	2593	68	2.43845	18_1	0	0
262	PGHST0058.61.metabat2.contigs	HKGutMicMap	non-CRC	Hong Kong	98.88	3.37	d__Bacteria;p__Fusobacteriota;c__Fusobacteriia;o__Fusobacteriales;f__Fusobacteriaceae;g__Fusobacterium_A;s__Fusobacterium_A ulcerans	NA	2947808	30.5	2976	310	0.358825	11_7	4	0
263	PGHST0065.12.contigs	HKGutMicMap	non-CRC	Hong Kong	98.88	1.12	d__Bacteria;p__Fusobacteriota;c__Fusobacteriia;o__Fusobacteriales;f__Fusobacteriaceae;g__Fusobacterium_A;s__Fusobacterium_A mortiferum	NA	2722944	29	2667	70	1.82147	18_1	0	0
264	PGHST0067.027.contigs	HKGutMicMap	non-CRC	Hong Kong	100	2.62	d__Bacteria;p__Fusobacteriota;c__Fusobacteriia;o__Fusobacteriales;f__Fusobacteriaceae;g__Fusobacterium_A;s__	NA	3287333	29.1	3153	160	0.64819	12_2	0	0
265	PGHST0069.006.contigs	HKGutMicMap	non-CRC	Hong Kong	98.88	1.12	d__Bacteria;p__Fusobacteriota;c__Fusobacteriia;o__Fusobacteriales;f__Fusobacteriaceae;g__Fusobacterium_A;s__Fusobacterium_A mortiferum	NA	2756252	29	2649	62	6.01083	18_1	0	0
266	PGHST0071.13.contigs	HKGutMicMap	non-CRC	Hong Kong	98.88	2.25	d__Bacteria;p__Fusobacteriota;c__Fusobacteriia;o__Fusobacteriales;f__Fusobacteriaceae;g__Fusobacterium_A;s__Fusobacterium_A mortiferum	NA	2573288	29	2491	112	0.533452	18_1	0	0
267	PGHST0079.7.metabat2.contigs	HKGutMicMap	non-CRC	Hong Kong	100	3.93	d__Bacteria;p__Fusobacteriota;c__Fusobacteriia;o__Fusobacteriales;f__Fusobacteriaceae;g__Fusobacterium_A;s__	NA	3203992	29	3054	121	1.41537	12_2	1	0
268	PGHST0083.12.metabat2.contigs	HKGutMicMap	non-CRC	Hong Kong	98.88	1.12	d__Bacteria;p__Fusobacteriota;c__Fusobacteriia;o__Fusobacteriales;f__Fusobacteriaceae;g__Fusobacterium_A;s__Fusobacterium_A mortiferum	NA	2530418	29	2386	96	0.491328	18_1	0	0
269	PGHST0085.4.metabat2.contigs	HKGutMicMap	non-CRC	Hong Kong	100	0	d__Bacteria;p__Fusobacteriota;c__Fusobacteriia;o__Fusobacteriales;f__Fusobacteriaceae;g__Fusobacterium_B;s__	NA	1609242	30.7	1515	23	0.522966	10_6	0	0
270	PGHST0086.8.contigs	HKGutMicMap	non-CRC	Hong Kong	98.88	1.69	d__Bacteria;p__Fusobacteriota;c__Fusobacteriia;o__Fusobacteriales;f__Fusobacteriaceae;g__Fusobacterium_A;s__Fusobacterium_A mortiferum	NA	2717761	29	2705	144	1.93485	18_1	0	0
271	pGHST100.007.contigs	HKGutMicMap	non-CRC	Hong Kong	98.88	1.12	d__Bacteria;p__Fusobacteriota;c__Fusobacteriia;o__Fusobacteriales;f__Fusobacteriaceae;g__Fusobacterium_A;s__Fusobacterium_A mortiferum	NA	2778640	29.1	2652	80	4.03844	18_1	0	0
272	pGHST30B_HF3YCDMXX.024.contigs	HKGutMicMap	non-CRC	Hong Kong	98.88	2.25	d__Bacteria;p__Fusobacteriota;c__Fusobacteriia;o__Fusobacteriales;f__Fusobacteriaceae;g__Fusobacterium_A;s__Fusobacterium_A mortiferum	NA	2734640	28.9	2713	259	0.476343	18_1	0	0
273	pGHST30C.028.contigs	HKGutMicMap	non-CRC	Hong Kong	94.38	1.4	d__Bacteria;p__Fusobacteriota;c__Fusobacteriia;o__Fusobacteriales;f__Fusobacteriaceae;g__Fusobacterium_A;s__Fusobacterium_A mortiferum	NA	2493864	28.9	2806	599	0.391127	18_1	0	0
274	PHMST105.017_sub.contigs	HKGutMicMap	non-CRC	Hong Kong	100	0.56	d__Bacteria;p__Fusobacteriota;c__Fusobacteriia;o__Fusobacteriales;f__Fusobacteriaceae;g__Fusobacterium_B;s__	NA	2419532	29.9	2344	147	0.585332	10_7	0	0
275	PHMST107.18.metabat2102.contigs	HKGutMicMap	non-CRC	Hong Kong	100	0	d__Bacteria;p__Fusobacteriota;c__Fusobacteriia;o__Fusobacteriales;f__Fusobacteriaceae;g__Fusobacterium_B;s__	NA	2311376	31.4	2265	66	0.562485	8_2	0	0
276	PHMST115.053.contigs	HKGutMicMap	non-CRC	Hong Kong	93.26	2.81	d__Bacteria;p__Fusobacteriota;c__Fusobacteriia;o__Fusobacteriales;f__Fusobacteriaceae;g__Fusobacterium_A;s__Fusobacterium_A mortiferum	NA	2214461	29.5	2584	629	0.243185	18_1	0	0
277	PHMST120.19.metabat2102.contigs	HKGutMicMap	non-CRC	Hong Kong	98.88	1.12	d__Bacteria;p__Fusobacteriota;c__Fusobacteriia;o__Fusobacteriales;f__Fusobacteriaceae;g__Fusobacterium_A;s__Fusobacterium_A mortiferum	NA	2759676	28.8	2720	88	2.29097	18_1	0	0
278	PHMST122.14.metabat2102.contigs	HKGutMicMap	non-CRC	Hong Kong	98.88	1.12	d__Bacteria;p__Fusobacteriota;c__Fusobacteriia;o__Fusobacteriales;f__Fusobacteriaceae;g__Fusobacterium_A;s__Fusobacterium_A mortiferum	NA	2623604	29	2503	46	1.56057	18_1	0	0
279	PHMST132.19.metabat2102.contigs	HKGutMicMap	non-CRC	Hong Kong	98.88	1.12	d__Bacteria;p__Fusobacteriota;c__Fusobacteriia;o__Fusobacteriales;f__Fusobacteriaceae;g__Fusobacterium_A;s__Fusobacterium_A mortiferum	NA	2613799	29	2517	53	0.739585	18_1	0	0
280	PHMST134.016.contigs	HKGutMicMap	non-CRC	Hong Kong	98.88	1.12	d__Bacteria;p__Fusobacteriota;c__Fusobacteriia;o__Fusobacteriales;f__Fusobacteriaceae;g__Fusobacterium_A;s__Fusobacterium_A mortiferum	NA	2609304	29.1	2535	49	0.992445	18_1	0	0
281	PHMST14.31.metabat2121.contigs	HKGutMicMap	non-CRC	Hong Kong	97.75	2.25	d__Bacteria;p__Fusobacteriota;c__Fusobacteriia;o__Fusobacteriales;f__Fusobacteriaceae;g__Fusobacterium_A;s__	NA	2993773	29	3115	375	0.541509	12_2	1	0
282	PHMST148.006.contigs	HKGutMicMap	non-CRC	Hong Kong	98.88	1.12	d__Bacteria;p__Fusobacteriota;c__Fusobacteriia;o__Fusobacteriales;f__Fusobacteriaceae;g__Fusobacterium_A;s__Fusobacterium_A mortiferum	NA	2732617	29.4	2634	89	5.63641	18_1	0	0
283	PHMST149.027_sub.contigs	HKGutMicMap	non-CRC	Hong Kong	98.88	2.81	d__Bacteria;p__Fusobacteriota;c__Fusobacteriia;o__Fusobacteriales;f__Fusobacteriaceae;g__Fusobacterium_A;s__Fusobacterium_A mortiferum	NA	2498681	29.2	2464	71	0.474686	18_1	0	0
284	PHMST161.025.contigs	HKGutMicMap	non-CRC	Hong Kong	98.88	2.25	d__Bacteria;p__Fusobacteriota;c__Fusobacteriia;o__Fusobacteriales;f__Fusobacteriaceae;g__Fusobacterium_A;s__Fusobacterium_A mortiferum	NA	2706358	29	2711	155	0.511408	18_1	0	0
285	PHMST162.31.metabat2121.contigs	HKGutMicMap	non-CRC	Hong Kong	98.88	1.12	d__Bacteria;p__Fusobacteriota;c__Fusobacteriia;o__Fusobacteriales;f__Fusobacteriaceae;g__Fusobacterium_A;s__Fusobacterium_A mortiferum	NA	2398507	29.1	2331	188	0.326883	18_6	0	0
286	PHMST166.016.contigs	HKGutMicMap	non-CRC	Hong Kong	98.88	1.12	d__Bacteria;p__Fusobacteriota;c__Fusobacteriia;o__Fusobacteriales;f__Fusobacteriaceae;g__Fusobacterium_A;s__Fusobacterium_A mortiferum	NA	2657455	29	2550	73	1.36206	18_1	0	0
287	PHMST185.56.metabat2121.contigs	HKGutMicMap	non-CRC	Hong Kong	94.94	1.69	d__Bacteria;p__Fusobacteriota;c__Fusobacteriia;o__Fusobacteriales;f__Fusobacteriaceae;g__Fusobacterium_A;s__Fusobacterium_A mortiferum	NA	2310733	29.1	2402	297	0.289117	18_1	0	0
288	pHMST187R.17.metabat2102_sub.contigs	HKGutMicMap	non-CRC	Hong Kong	90.45	1.12	d__Bacteria;p__Fusobacteriota;c__Fusobacteriia;o__Fusobacteriales;f__Fusobacteriaceae;g__Fusobacterium_A;s__Fusobacterium_A mortiferum	NA	2347762	28.9	2466	258	0.488747	18_1	0	0
289	PHMST194.23.metabat2102_sub.contigs	HKGutMicMap	non-CRC	Hong Kong	100	0	d__Bacteria;p__Fusobacteriota;c__Fusobacteriia;o__Fusobacteriales;f__Fusobacteriaceae;g__Fusobacterium_B;s__	NA	2289927	30.3	2229	60	0.595326	10_6	0	0
290	PHMST195.11.metabat2121.contigs	HKGutMicMap	non-CRC	Hong Kong	96.63	1.12	d__Bacteria;p__Fusobacteriota;c__Fusobacteriia;o__Fusobacteriales;f__Fusobacteriaceae;g__Fusobacterium_A;s__Fusobacterium_A mortiferum	NA	2239502	29.2	2155	74	1.10981	18_1	0	0
291	PHMST195.8.metabat2102.contigs	HKGutMicMap	rheumatic clinic, non-CRC	Hong Kong	97.75	3.37	d__Bacteria;p__Fusobacteriota;c__Fusobacteriia;o__Fusobacteriales;f__Fusobacteriaceae;g__Cetobacterium_A;s__	NA	3155022	30.6	3029	118	0.640061	3_0	0	0
292	PHMST197.005.contigs	HKGutMicMap	non-CRC	Hong Kong	98.88	2.25	d__Bacteria;p__Fusobacteriota;c__Fusobacteriia;o__Fusobacteriales;f__Fusobacteriaceae;g__Fusobacterium_A;s__	NA	2473538	29.4	2372	135	8.03914	13_14	0	0
293	PHMST198.14.metabat2102.contigs	HKGutMicMap	non-CRC	Hong Kong	100	2.25	d__Bacteria;p__Fusobacteriota;c__Fusobacteriia;o__Fusobacteriales;f__Fusobacteriaceae;g__Fusobacterium_A;s__	NA	3165582	29	2964	86	0.583567	12_2	1	0
294	PHMST203.15.metabat2102.contigs	HKGutMicMap	non-CRC	Hong Kong	100	3.37	d__Bacteria;p__Fusobacteriota;c__Fusobacteriia;o__Fusobacteriales;f__Fusobacteriaceae;g__Fusobacterium_A;s__	NA	2610395	29.1	2551	108	0.858761	13_12	0	0
295	PHMST205.24.metabat2102.contigs	HKGutMicMap	non-CRC	Hong Kong	100	2.25	d__Bacteria;p__Fusobacteriota;c__Fusobacteriia;o__Fusobacteriales;f__Fusobacteriaceae;g__Fusobacterium_A;s__	NA	2418956	29.4	2308	122	1.84185	13_22	0	0
296	PHMST208.10.metabat2102.contigs	HKGutMicMap	non-CRC	Hong Kong	98.88	1.12	d__Bacteria;p__Fusobacteriota;c__Fusobacteriia;o__Fusobacteriales;f__Fusobacteriaceae;g__Fusobacterium_A;s__	NA	2635410	30.4	2492	46	1.54436	16_2	0	0
297	PHMST216.009.contigs	HKGutMicMap	non-CRC	Hong Kong	98.88	3.37	d__Bacteria;p__Fusobacteriota;c__Fusobacteriia;o__Fusobacteriales;f__Fusobacteriaceae;g__Fusobacterium_A;s__Fusobacterium_A mortiferum	NA	2969767	28.7	2903	105	1.73641	18_1	0	0
298	PHMST229.019.contigs	HKGutMicMap	non-CRC	Hong Kong	98.88	2.81	d__Bacteria;p__Fusobacteriota;c__Fusobacteriia;o__Fusobacteriales;f__Fusobacteriaceae;g__Fusobacterium_A;s__Fusobacterium_A mortiferum	NA	2723338	29	2636	92	0.815633	18_1	0	0
299	PHMST234.017.contigs	HKGutMicMap	non-CRC	Hong Kong	98.88	2.25	d__Bacteria;p__Fusobacteriota;c__Fusobacteriia;o__Fusobacteriales;f__Fusobacteriaceae;g__Fusobacterium_A;s__	NA	3247285	29.1	3021	103	1.44795	12_2	0	0
300	PHMST238.14.metabat2102.contigs	HKGutMicMap	non-CRC	Hong Kong	98.88	1.12	d__Bacteria;p__Fusobacteriota;c__Fusobacteriia;o__Fusobacteriales;f__Fusobacteriaceae;g__Fusobacterium_A;s__Fusobacterium_A mortiferum	NA	2538772	29	2423	94	1.13731	18_1	0	0
301	PHMST257.014_sub.contigs	HKGutMicMap	non-CRC	Hong Kong	98.88	1.12	d__Bacteria;p__Fusobacteriota;c__Fusobacteriia;o__Fusobacteriales;f__Fusobacteriaceae;g__Fusobacterium_A;s__Fusobacterium_A mortiferum	NA	2675820	29	2601	128	1.37174	18_1	0	0
302	PHMST261.18.metabat2102_sub.contigs	HKGutMicMap	non-CRC	Hong Kong	97.75	3.37	d__Bacteria;p__Fusobacteriota;c__Fusobacteriia;o__Fusobacteriales;f__Fusobacteriaceae;g__Fusobacterium_A;s__	NA	2246925	29.5	2148	138	0.381364	13_13	0	0
303	PHMST271.9.metabat2102.contigs	HKGutMicMap	non-CRC	Hong Kong	100	2.25	d__Bacteria;p__Fusobacteriota;c__Fusobacteriia;o__Fusobacteriales;f__Fusobacteriaceae;g__Fusobacterium_A;s__	NA	3236880	29	3037	74	2.41736	12_2	1	0
304	PHMST272.16.metabat2102.contigs	HKGutMicMap	non-CRC	Hong Kong	98.88	1.12	d__Bacteria;p__Fusobacteriota;c__Fusobacteriia;o__Fusobacteriales;f__Fusobacteriaceae;g__Fusobacterium_A;s__Fusobacterium_A mortiferum	NA	2701074	28.8	2595	57	2.45378	18_1	0	0
305	PHMST273.17.metabat2102.contigs	HKGutMicMap	non-CRC	Hong Kong	95.51	1.12	d__Bacteria;p__Fusobacteriota;c__Fusobacteriia;o__Fusobacteriales;f__Fusobacteriaceae;g__Fusobacterium_A;s__Fusobacterium_A mortiferum	NA	2478421	28.9	2488	214	0.391738	18_1	0	0
306	PHMST280.14.metabat2121.contigs	HKGutMicMap	non-CRC	Hong Kong	97.75	2.25	d__Bacteria;p__Fusobacteriota;c__Fusobacteriia;o__Fusobacteriales;f__Fusobacteriaceae;g__Fusobacterium_A;s__Fusobacterium_A ulcerans	NA	3297825	30.4	3303	240	0.371215	11_3	4	0
307	pHMST292_HF3YCDMXX.009.contigs	HKGutMicMap	non-CRC	Hong Kong	98.88	2.25	d__Bacteria;p__Fusobacteriota;c__Fusobacteriia;o__Fusobacteriales;f__Fusobacteriaceae;g__Fusobacterium_A;s__Fusobacterium_A mortiferum	NA	2892516	28.8	2846	70	1.07644	18_1	0	0
308	pHMST299_HF3YCDMXX.014.contigs	HKGutMicMap	non-CRC	Hong Kong	100	0	d__Bacteria;p__Fusobacteriota;c__Fusobacteriia;o__Fusobacteriales;f__Fusobacteriaceae;g__Fusobacterium_B;s__	NA	2183791	30	2028	69	1.16163	10_3	0	0
309	pHMST301_HF3YCDMXX.11.metabat2121.contigs	HKGutMicMap	non-CRC	Hong Kong	100	2.25	d__Bacteria;p__Fusobacteriota;c__Fusobacteriia;o__Fusobacteriales;f__Fusobacteriaceae;g__Fusobacterium_A;s__	NA	3119501	29.8	3201	340	0.426993	11_1	1	0
310	pHMST313_H7JCYDSXX.21.metabat2102.contigs	HKGutMicMap	non-CRC	Hong Kong	97.75	1.12	d__Bacteria;p__Fusobacteriota;c__Fusobacteriia;o__Fusobacteriales;f__Fusobacteriaceae;g__Fusobacterium_A;s__Fusobacterium_A mortiferum	NA	2526686	29.1	2431	79	0.594451	18_1	0	0
311	pHMST327_H7JCYDSXX.10.metabat2102.contigs	HKGutMicMap	non-CRC	Hong Kong	100	2.25	d__Bacteria;p__Fusobacteriota;c__Fusobacteriia;o__Fusobacteriales;f__Fusobacteriaceae;g__Fusobacterium_A;s__	NA	3160703	28.9	2929	84	1.27349	12_2	1	0
312	pHMST329_HF3YCDMXX.33.metabat2121.contigs	HKGutMicMap	non-CRC	Hong Kong	100	1.5	d__Bacteria;p__Fusobacteriota;c__Fusobacteriia;o__Fusobacteriales;f__Fusobacteriaceae;g__Fusobacterium_A;s__	NA	3132248	29	3196	240	0.402062	12_2	1	0
313	PHMST33.10.metabat2102.contigs	HKGutMicMap	non-CRC	Hong Kong	97.75	1.12	d__Bacteria;p__Fusobacteriota;c__Fusobacteriia;o__Fusobacteriales;f__Fusobacteriaceae;g__Fusobacterium_A;s__Fusobacterium_A mortiferum	NA	2596936	29	2551	153	0.471238	18_1	0	0
314	pHMST348_HF3YCDMXX.12.metabat2121.contigs	HKGutMicMap	non-CRC	Hong Kong	100	2.25	d__Bacteria;p__Fusobacteriota;c__Fusobacteriia;o__Fusobacteriales;f__Fusobacteriaceae;g__Fusobacterium_A;s__	NA	3212375	28.9	3027	76	0.818784	12_2	1	0
315	pHMST369_HF3YCDMXX.9.metabat2102.contigs	HKGutMicMap	non-CRC	Hong Kong	100	2.25	d__Bacteria;p__Fusobacteriota;c__Fusobacteriia;o__Fusobacteriales;f__Fusobacteriaceae;g__Fusobacterium_A;s__	NA	3163839	29.1	2959	90	0.917	12_2	0	0
316	PHMST381.014.contigs	HKGutMicMap	rheumatic clinic, non-CRC	Hong Kong	98.88	1.12	d__Bacteria;p__Fusobacteriota;c__Fusobacteriia;o__Fusobacteriales;f__Fusobacteriaceae;g__Fusobacterium_A;s__Fusobacterium_A mortiferum	NA	2664513	29	2571	78	1.4491	18_1	0	0
317	pHMST397_HF3YCDMXX.9.metabat2121.contigs	HKGutMicMap	non-CRC	Hong Kong	97.57	1.12	d__Bacteria;p__Fusobacteriota;c__Fusobacteriia;o__Fusobacteriales;f__Fusobacteriaceae;g__Fusobacterium_A;s__	NA	3017433	29	2956	235	0.429704	12_2	1	0
318	PHMST403.24.metabat2102.contigs	HKGutMicMap	rheumatic clinic, non-CRC	Hong Kong	98.88	1.12	d__Bacteria;p__Fusobacteriota;c__Fusobacteriia;o__Fusobacteriales;f__Fusobacteriaceae;g__Fusobacterium_A;s__Fusobacterium_A mortiferum	NA	2616820	29	2523	109	0.52698	18_1	0	0
319	pHMST422_HF3YCDMXX.16.metabat2102.contigs	HKGutMicMap	non-CRC	Hong Kong	97.75	1.12	d__Bacteria;p__Fusobacteriota;c__Fusobacteriia;o__Fusobacteriales;f__Fusobacteriaceae;g__Fusobacterium_A;s__Fusobacterium_A mortiferum	NA	2580858	29	2497	132	0.473031	18_1	0	0
320	pHMST436_HF3YCDMXX.16.metabat2102.contigs	HKGutMicMap	non-CRC	Hong Kong	100	1.12	d__Bacteria;p__Fusobacteriota;c__Fusobacteriia;o__Fusobacteriales;f__Fusobacteriaceae;g__Fusobacterium_B;s__	NA	2370822	31.3	2168	60	1.52145	6_1	0	0
321	pHMST450.24.metabat2102.contigs	HKGutMicMap	non-CRC	Hong Kong	98.88	4.49	d__Bacteria;p__Fusobacteriota;c__Fusobacteriia;o__Fusobacteriales;f__Fusobacteriaceae;g__Fusobacterium_A;s__	NA	2588195	29.2	2431	113	0.852882	13_8	0	0
322	pHMST454.21.metabat2102.contigs	HKGutMicMap	non-CRC	Hong Kong	100	2.25	d__Bacteria;p__Fusobacteriota;c__Fusobacteriia;o__Fusobacteriales;f__Fusobacteriaceae;g__Fusobacterium_A;s__	NA	2394210	29.6	2336	114	5.0402	13_16	0	0
323	pHMST464.022.contigs	HKGutMicMap	non-CRC	Hong Kong	97.75	1.12	d__Bacteria;p__Fusobacteriota;c__Fusobacteriia;o__Fusobacteriales;f__Fusobacteriaceae;g__Fusobacterium_A;s__Fusobacterium_A mortiferum	NA	2609554	29.1	2562	111	0.499959	18_1	0	0
324	PHMST47.19.metabat2102.contigs	HKGutMicMap	non-CRC	Hong Kong	94.38	1.12	d__Bacteria;p__Fusobacteriota;c__Fusobacteriia;o__Fusobacteriales;f__Fusobacteriaceae;g__Fusobacterium_A;s__Fusobacterium_A mortiferum	NA	2469001	29	2526	250	0.308332	18_1	0	0
325	pHMST485.10.metabat2102.contigs	HKGutMicMap	non-CRC	Hong Kong	95.51	2.25	d__Bacteria;p__Fusobacteriota;c__Fusobacteriia;o__Fusobacteriales;f__Fusobacteriaceae;g__Fusobacterium_A;s__	NA	3255336	28.8	3062	97	1.46432	12_2	1	0
326	pHMST490.16.metabat2102.contigs	HKGutMicMap	non-CRC	Hong Kong	98.88	1.12	d__Bacteria;p__Fusobacteriota;c__Fusobacteriia;o__Fusobacteriales;f__Fusobacteriaceae;g__Fusobacterium_A;s__Fusobacterium_A mortiferum	NA	2621173	29.1	2553	47	2.06361	18_1	0	0
327	pHMST493.16.metabat2102.contigs	HKGutMicMap	non-CRC	Hong Kong	98.88	1.12	d__Bacteria;p__Fusobacteriota;c__Fusobacteriia;o__Fusobacteriales;f__Fusobacteriaceae;g__Fusobacterium_A;s__Fusobacterium_A mortiferum	NA	2639239	29.1	2565	56	1.65423	18_1	0	0
328	pHMST494.13.metabat2102.contigs	HKGutMicMap	non-CRC	Hong Kong	96.63	2.25	d__Bacteria;p__Fusobacteriota;c__Fusobacteriia;o__Fusobacteriales;f__Fusobacteriaceae;g__Fusobacterium_A;s__Fusobacterium_A ulcerans	NA	2855824	30.5	2947	316	0.449893	11_7	3	0
329	pHMST497.13.metabat2102.contigs	HKGutMicMap	non-CRC	Hong Kong	100	2.25	d__Bacteria;p__Fusobacteriota;c__Fusobacteriia;o__Fusobacteriales;f__Fusobacteriaceae;g__Fusobacterium_A;s__Fusobacterium_A ulcerans	NA	3203206	30.4	3128	149	0.544013	11_5	2	0
330	pHMST499.26.metabat2121.contigs	HKGutMicMap	non-CRC	Hong Kong	98.88	1.12	d__Bacteria;p__Fusobacteriota;c__Fusobacteriia;o__Fusobacteriales;f__Fusobacteriaceae;g__Fusobacterium_A;s__	NA	3093774	29.1	2934	65	1.51969	12_2	0	0
331	pHMST506.18.metabat2121.contigs	HKGutMicMap	rheumatic clinic, non-CRC	Hong Kong	100	2.25	d__Bacteria;p__Fusobacteriota;c__Fusobacteriia;o__Fusobacteriales;f__Fusobacteriaceae;g__Fusobacterium_A;s__	NA	3214743	28.9	3066	83	1.66582	12_2	1	0
332	PHMST61.22.metabat2102.contigs	HKGutMicMap	non-CRC	Hong Kong	98.88	1.12	d__Bacteria;p__Fusobacteriota;c__Fusobacteriia;o__Fusobacteriales;f__Fusobacteriaceae;g__Fusobacterium_A;s__Fusobacterium_A mortiferum	NA	2468970	29.1	2336	40	0.82276	18_1	0	0
333	PHMST76.021.contigs	HKGutMicMap	non-CRC	Hong Kong	98.88	1.12	d__Bacteria;p__Fusobacteriota;c__Fusobacteriia;o__Fusobacteriales;f__Fusobacteriaceae;g__Fusobacterium_A;s__Fusobacterium_A mortiferum	NA	2701389	28.9	2645	81	1.17634	18_1	0	0
334	PHMST99.17.metabat2102.contigs	HKGutMicMap	non-CRC	Hong Kong	96.63	2.25	d__Bacteria;p__Fusobacteriota;c__Fusobacteriia;o__Fusobacteriales;f__Fusobacteriaceae;g__Fusobacterium_A;s__Fusobacterium_A mortiferum	NA	2680865	28.9	2755	223	0.706917	18_1	0	0
335	ERR1018259_bin.33	Almeida et al., 2019	non-CRC	China	98.88	2.25	d__Bacteria;p__Fusobacteriota;c__Fusobacteriia;o__Fusobacteriales;f__Fusobacteriaceae;g__Cetobacterium_A;s__Cetobacterium_A somerae	NA	3276594	28.5	3169	113	NA	2_1	0	0
336	ERR1620315_bin.37	Almeida et al., 2019	non-CRC	China	97.39	2.73	d__Bacteria;p__Fusobacteriota;c__Fusobacteriia;o__Fusobacteriales;f__Fusobacteriaceae;g__Cetobacterium_A;s__Cetobacterium_A somerae	NA	3289024	28.6	3273	279	NA	2_2	0	0
337	ERR1620272_bin.11	Almeida et al., 2019	non-CRC	China	98.86	0.78	d__Bacteria;p__Fusobacteriota;c__Fusobacteriia;o__Fusobacteriales;f__Fusobacteriaceae;g__Fusobacterium;s__Fusobacterium animalis	NA	2545914	26.8	2548	237	NA	23_20	1	0
338	ERR1620298_bin.9	Almeida et al., 2019	non-CRC	China	96.02	0	d__Bacteria;p__Fusobacteriota;c__Fusobacteriia;o__Fusobacteriales;f__Fusobacteriaceae;g__Fusobacterium;s__Fusobacterium animalis	NA	2447938	26.8	2309	70	NA	23_16	1	1
339	ERR209701_bin.30	Almeida et al., 2019	non-CRC	Spain	95.45	0	d__Bacteria;p__Fusobacteriota;c__Fusobacteriia;o__Fusobacteriales;f__Fusobacteriaceae;g__Fusobacterium;s__Fusobacterium animalis	NA	2428811	26.8	2447	200	NA	23_18	1	0
340	ERR209715_bin.6	Almeida et al., 2019	non-CRC	Spain	92.61	0.16	d__Bacteria;p__Fusobacteriota;c__Fusobacteriia;o__Fusobacteriales;f__Fusobacteriaceae;g__Fusobacterium;s__Fusobacterium animalis	NA	2045587	27.1	2104	338	NA	23_32	1	1
341	ERR209731_bin.26	Almeida et al., 2019	non-CRC	Spain	90.91	0.57	d__Bacteria;p__Fusobacteriota;c__Fusobacteriia;o__Fusobacteriales;f__Fusobacteriaceae;g__Fusobacterium;s__Fusobacterium animalis	NA	2259529	27.1	2335	234	NA	23_13	1	0
342	ERR209732_bin.5	Almeida et al., 2019	non-CRC	Spain	97.73	0.57	d__Bacteria;p__Fusobacteriota;c__Fusobacteriia;o__Fusobacteriales;f__Fusobacteriaceae;g__Fusobacterium;s__Fusobacterium animalis	NA	2306830	26.9	2340	163	NA	23_13	1	0
343	ERR414442_bin.9	Almeida et al., 2019	non-CRC	Spain	96.59	0.57	d__Bacteria;p__Fusobacteriota;c__Fusobacteriia;o__Fusobacteriales;f__Fusobacteriaceae;g__Fusobacterium;s__Fusobacterium animalis	NA	2306256	26.8	2354	133	NA	23_13	1	0
344	ERR1018241_bin.50	Almeida et al., 2019	non-CRC	China	92.7	0	d__Bacteria;p__Fusobacteriota;c__Fusobacteriia;o__Fusobacteriales;f__Fusobacteriaceae;g__Fusobacterium;s__Fusobacterium nucleatum_E	NA	2081813	27.5	2194	396	NA	22_1	1	0
345	ERR1305880_bin.1	Almeida et al., 2019	non-CRC	Denmark	94.38	1.12	d__Bacteria;p__Fusobacteriota;c__Fusobacteriia;o__Fusobacteriales;f__Fusobacteriaceae;g__Fusobacterium;s__Fusobacterium periodonticum	NA	1850196	28.7	1871	349	NA	21_39	0	1
346	ERR1018219_bin.4	Almeida et al., 2019	non-CRC	China	96.97	2.25	d__Bacteria;p__Fusobacteriota;c__Fusobacteriia;o__Fusobacteriales;f__Fusobacteriaceae;g__Fusobacterium_A;s__	NA	3105943	29.1	2920	148	NA	12_2	1	0
347	ERR1018241_bin.25	Almeida et al., 2019	non-CRC	China	100	2.25	d__Bacteria;p__Fusobacteriota;c__Fusobacteriia;o__Fusobacteriales;f__Fusobacteriaceae;g__Fusobacterium_A;s__	NA	3236245	28.9	3079	111	NA	12_2	1	0
348	ERR1018300_bin.2	Almeida et al., 2019	non-CRC	China	97.11	2.25	d__Bacteria;p__Fusobacteriota;c__Fusobacteriia;o__Fusobacteriales;f__Fusobacteriaceae;g__Fusobacterium_A;s__	NA	2473719	29.6	2419	207	NA	13_14	0	0
349	ERR1190564_bin.25	Almeida et al., 2019	non-CRC	China	97.75	2.25	d__Bacteria;p__Fusobacteriota;c__Fusobacteriia;o__Fusobacteriales;f__Fusobacteriaceae;g__Fusobacterium_A;s__	NA	3018030	29.2	2938	137	NA	12_2	1	0
350	ERR1190574_bin.24	Almeida et al., 2019	non-CRC	China	96.07	2.25	d__Bacteria;p__Fusobacteriota;c__Fusobacteriia;o__Fusobacteriales;f__Fusobacteriaceae;g__Fusobacterium_A;s__	NA	3323268	29.6	3317	290	NA	11_2	4	0
351	ERR1190605_bin.19	Almeida et al., 2019	non-CRC	China	93.82	2.25	d__Bacteria;p__Fusobacteriota;c__Fusobacteriia;o__Fusobacteriales;f__Fusobacteriaceae;g__Fusobacterium_A;s__	NA	3566222	29.3	3645	613	NA	12_3	4	0
352	ERR1190609_bin.10	Almeida et al., 2019	non-CRC	China	90.67	4.49	d__Bacteria;p__Fusobacteriota;c__Fusobacteriia;o__Fusobacteriales;f__Fusobacteriaceae;g__Fusobacterium_A;s__	NA	2919445	29.7	2864	243	NA	11_1	3	0
353	ERR1190612_bin.36	Almeida et al., 2019	non-CRC	China	96.63	3.37	d__Bacteria;p__Fusobacteriota;c__Fusobacteriia;o__Fusobacteriales;f__Fusobacteriaceae;g__Fusobacterium_A;s__	NA	3133419	30.2	3171	481	NA	11_1	2	0
354	ERR1190829_bin.6	Almeida et al., 2019	non-CRC	China	98.97	1.12	d__Bacteria;p__Fusobacteriota;c__Fusobacteriia;o__Fusobacteriales;f__Fusobacteriaceae;g__Fusobacterium_A;s__	NA	3165217	29	2951	90	NA	12_2	1	0
355	ERR1578649_bin.33	Almeida et al., 2019	non-CRC	China	100	2.25	d__Bacteria;p__Fusobacteriota;c__Fusobacteriia;o__Fusobacteriales;f__Fusobacteriaceae;g__Fusobacterium_A;s__	NA	3114490	29.1	2942	143	NA	12_2	2	0
356	ERR1578674_bin.15	Almeida et al., 2019	non-CRC	China	100	1.12	d__Bacteria;p__Fusobacteriota;c__Fusobacteriia;o__Fusobacteriales;f__Fusobacteriaceae;g__Fusobacterium_A;s__	NA	3129149	29.2	2905	223	NA	12_2	2	0
357	ERR1620267_bin.16	Almeida et al., 2019	non-CRC	China	100	2.25	d__Bacteria;p__Fusobacteriota;c__Fusobacteriia;o__Fusobacteriales;f__Fusobacteriaceae;g__Fusobacterium_A;s__	NA	3157782	28.9	2995	66	NA	12_2	2	0
358	ERR1620272_bin.10	Almeida et al., 2019	non-CRC	China	100	4.01	d__Bacteria;p__Fusobacteriota;c__Fusobacteriia;o__Fusobacteriales;f__Fusobacteriaceae;g__Fusobacterium_A;s__	NA	3149250	29	2975	75	NA	12_2	2	0
359	ERR1620278_bin.17	Almeida et al., 2019	non-CRC	China	94.38	2.25	d__Bacteria;p__Fusobacteriota;c__Fusobacteriia;o__Fusobacteriales;f__Fusobacteriaceae;g__Fusobacterium_A;s__	NA	3097210	28.9	3061	194	NA	12_2	2	0
360	ERR1620303_bin.6	Almeida et al., 2019	non-CRC	China	97.75	2.25	d__Bacteria;p__Fusobacteriota;c__Fusobacteriia;o__Fusobacteriales;f__Fusobacteriaceae;g__Fusobacterium_A;s__	NA	2410323	29.3	2190	58	NA	12_2	0	0
361	ERR1620307_bin.16	Almeida et al., 2019	non-CRC	China	94.38	2.25	d__Bacteria;p__Fusobacteriota;c__Fusobacteriia;o__Fusobacteriales;f__Fusobacteriaceae;g__Fusobacterium_A;s__	NA	2483502	29.4	2378	162	NA	12_2	0	0
362	ERR209697_bin.20	Almeida et al., 2019	non-CRC	Spain	93.26	2.25	d__Bacteria;p__Fusobacteriota;c__Fusobacteriia;o__Fusobacteriales;f__Fusobacteriaceae;g__Fusobacterium_A;s__	NA	1995240	29.9	2043	213	NA	17_1	0	0
363	ERR2013618_bin.61	Almeida et al., 2019	non-CRC	China	100	2.25	d__Bacteria;p__Fusobacteriota;c__Fusobacteriia;o__Fusobacteriales;f__Fusobacteriaceae;g__Fusobacterium_A;s__	NA	3026562	29.3	2880	200	NA	12_2	1	0
364	ERR589845_bin.17	Almeida et al., 2019	non-CRC	China	97.75	3.37	d__Bacteria;p__Fusobacteriota;c__Fusobacteriia;o__Fusobacteriales;f__Fusobacteriaceae;g__Fusobacterium_A;s__	NA	2906876	29.3	2796	337	NA	12_2	2	0
365	SRR341640_bin.17	Almeida et al., 2019	non-CRC	China	98.88	3.37	d__Bacteria;p__Fusobacteriota;c__Fusobacteriia;o__Fusobacteriales;f__Fusobacteriaceae;g__Fusobacterium_A;s__	NA	3271791	29.4	3127	176	NA	12_2	2	0
366	SRR341650_bin.10	Almeida et al., 2019	non-CRC	China	96.63	4.65	d__Bacteria;p__Fusobacteriota;c__Fusobacteriia;o__Fusobacteriales;f__Fusobacteriaceae;g__Fusobacterium_A;s__	NA	2877898	28.6	2898	289	NA	13_5	0	0
367	SRR341651_bin.15	Almeida et al., 2019	non-CRC	China	97.75	1.12	d__Bacteria;p__Fusobacteriota;c__Fusobacteriia;o__Fusobacteriales;f__Fusobacteriaceae;g__Fusobacterium_A;s__	NA	2008086	29.5	1941	133	NA	13_6	0	0
368	SRR341703_bin.5	Almeida et al., 2019	non-CRC	China	96.63	3.37	d__Bacteria;p__Fusobacteriota;c__Fusobacteriia;o__Fusobacteriales;f__Fusobacteriaceae;g__Fusobacterium_A;s__	NA	2174671	29.4	2156	287	NA	13_7	0	0
369	SRR5056650_bin.66	Almeida et al., 2019	non-CRC	USA	94.38	3.37	d__Bacteria;p__Fusobacteriota;c__Fusobacteriia;o__Fusobacteriales;f__Fusobacteriaceae;g__Fusobacterium_A;s__	NA	3215736	29.4	3445	541	NA	12_2	2	0
370	SRR5056852_bin.96	Almeida et al., 2019	non-CRC	USA	90.05	2.62	d__Bacteria;p__Fusobacteriota;c__Fusobacteriia;o__Fusobacteriales;f__Fusobacteriaceae;g__Fusobacterium_A;s__	NA	2678451	28.7	2731	287	NA	13_20	0	0
371	SRR5057070_bin.16	Almeida et al., 2019	non-CRC	USA	93.26	3.37	d__Bacteria;p__Fusobacteriota;c__Fusobacteriia;o__Fusobacteriales;f__Fusobacteriaceae;g__Fusobacterium_A;s__	NA	2878092	29.2	2981	407	NA	12_2	2	0
372	SRR5275396_bin.5	Almeida et al., 2019	non-CRC	USA	97.75	3.37	d__Bacteria;p__Fusobacteriota;c__Fusobacteriia;o__Fusobacteriales;f__Fusobacteriaceae;g__Fusobacterium_A;s__	NA	2399818	29.7	2416	272	NA	13_14	0	0
373	SRR5275410_bin.24	Almeida et al., 2019	non-CRC	USA	98.88	1.12	d__Bacteria;p__Fusobacteriota;c__Fusobacteriia;o__Fusobacteriales;f__Fusobacteriaceae;g__Fusobacterium_A;s__	NA	2294801	29.7	2240	226	NA	13_17	0	0
374	ERR1018214_bin.24	Almeida et al., 2019	non-CRC	China	94.38	1.12	d__Bacteria;p__Fusobacteriota;c__Fusobacteriia;o__Fusobacteriales;f__Fusobacteriaceae;g__Fusobacterium_A;s__Fusobacterium_A mortiferum	NA	2471607	29.2	2401	128	NA	18_1	0	0
375	ERR1018227_bin.51	Almeida et al., 2019	non-CRC	China	97.75	1.12	d__Bacteria;p__Fusobacteriota;c__Fusobacteriia;o__Fusobacteriales;f__Fusobacteriaceae;g__Fusobacterium_A;s__Fusobacterium_A mortiferum	NA	2543980	28.9	2421	91	NA	18_1	0	0
376	ERR1190535_bin.2	Almeida et al., 2019	non-CRC	China	97.75	1.12	d__Bacteria;p__Fusobacteriota;c__Fusobacteriia;o__Fusobacteriales;f__Fusobacteriaceae;g__Fusobacterium_A;s__Fusobacterium_A mortiferum	NA	2564093	28.9	2597	159	NA	18_1	0	0
377	ERR1190573_bin.10	Almeida et al., 2019	non-CRC	China	96.63	3.37	d__Bacteria;p__Fusobacteriota;c__Fusobacteriia;o__Fusobacteriales;f__Fusobacteriaceae;g__Fusobacterium_A;s__Fusobacterium_A mortiferum	NA	2537865	29.1	2543	198	NA	18_1	0	0
378	ERR1190602_bin.19	Almeida et al., 2019	non-CRC	China	98.88	1.12	d__Bacteria;p__Fusobacteriota;c__Fusobacteriia;o__Fusobacteriales;f__Fusobacteriaceae;g__Fusobacterium_A;s__Fusobacterium_A mortiferum	NA	2612349	29.1	2519	147	NA	18_1	0	0
379	ERR1190620_bin.13	Almeida et al., 2019	non-CRC	China	92.13	2.25	d__Bacteria;p__Fusobacteriota;c__Fusobacteriia;o__Fusobacteriales;f__Fusobacteriaceae;g__Fusobacterium_A;s__Fusobacterium_A mortiferum	NA	2418919	29.2	2388	206	NA	18_1	0	0
380	ERR1190797_bin.28	Almeida et al., 2019	non-CRC	China	97.75	1.51	d__Bacteria;p__Fusobacteriota;c__Fusobacteriia;o__Fusobacteriales;f__Fusobacteriaceae;g__Fusobacterium_A;s__Fusobacterium_A mortiferum	NA	2461576	29.6	2449	245	NA	18_1	0	0
381	ERR1190815_bin.45	Almeida et al., 2019	non-CRC	China	93.26	1.12	d__Bacteria;p__Fusobacteriota;c__Fusobacteriia;o__Fusobacteriales;f__Fusobacteriaceae;g__Fusobacterium_A;s__Fusobacterium_A mortiferum	NA	2514656	29.1	2394	178	NA	18_1	0	0
382	ERR1190819_bin.54	Almeida et al., 2019	non-CRC	China	92.13	1.12	d__Bacteria;p__Fusobacteriota;c__Fusobacteriia;o__Fusobacteriales;f__Fusobacteriaceae;g__Fusobacterium_A;s__Fusobacterium_A mortiferum	NA	2242583	29.2	2120	73	NA	18_1	0	0
383	ERR1190838_bin.16	Almeida et al., 2019	non-CRC	China	95.51	1.12	d__Bacteria;p__Fusobacteriota;c__Fusobacteriia;o__Fusobacteriales;f__Fusobacteriaceae;g__Fusobacterium_A;s__Fusobacterium_A mortiferum	NA	2141637	29.2	2001	53	NA	18_1	0	0
384	ERR1190859_bin.3	Almeida et al., 2019	non-CRC	China	92.13	1.5	d__Bacteria;p__Fusobacteriota;c__Fusobacteriia;o__Fusobacteriales;f__Fusobacteriaceae;g__Fusobacterium_A;s__Fusobacterium_A mortiferum	NA	2216382	29.6	2239	294	NA	18_1	0	0
385	ERR1190893_bin.90	Almeida et al., 2019	non-CRC	China	93.26	3.37	d__Bacteria;p__Fusobacteriota;c__Fusobacteriia;o__Fusobacteriales;f__Fusobacteriaceae;g__Fusobacterium_A;s__Fusobacterium_A mortiferum	NA	2486885	29.3	2452	208	NA	18_1	0	0
386	ERR1190915_bin.45	Almeida et al., 2019	non-CRC	China	92.58	1.12	d__Bacteria;p__Fusobacteriota;c__Fusobacteriia;o__Fusobacteriales;f__Fusobacteriaceae;g__Fusobacterium_A;s__Fusobacterium_A mortiferum	NA	2386533	28.9	2441	258	NA	18_1	0	0
387	ERR1190916_bin.23	Almeida et al., 2019	non-CRC	China	97.75	1.12	d__Bacteria;p__Fusobacteriota;c__Fusobacteriia;o__Fusobacteriales;f__Fusobacteriaceae;g__Fusobacterium_A;s__Fusobacterium_A mortiferum	NA	2583471	29.1	2551	184	NA	18_1	0	0
388	ERR1190953_bin.35	Almeida et al., 2019	non-CRC	China	91.01	1.12	d__Bacteria;p__Fusobacteriota;c__Fusobacteriia;o__Fusobacteriales;f__Fusobacteriaceae;g__Fusobacterium_A;s__Fusobacterium_A mortiferum	NA	1987330	29.2	1853	53	NA	18_1	0	0
389	ERR1578621_bin.13	Almeida et al., 2019	non-CRC	China	95.51	2.25	d__Bacteria;p__Fusobacteriota;c__Fusobacteriia;o__Fusobacteriales;f__Fusobacteriaceae;g__Fusobacterium_A;s__Fusobacterium_A mortiferum	NA	2532247	29	2574	226	NA	18_1	0	0
390	ERR1578666_bin.17	Almeida et al., 2019	non-CRC	China	98.88	1.12	d__Bacteria;p__Fusobacteriota;c__Fusobacteriia;o__Fusobacteriales;f__Fusobacteriaceae;g__Fusobacterium_A;s__Fusobacterium_A mortiferum	NA	2547774	29	2428	66	NA	18_1	0	0
391	ERR1620265_bin.21	Almeida et al., 2019	non-CRC	China	93.82	1.12	d__Bacteria;p__Fusobacteriota;c__Fusobacteriia;o__Fusobacteriales;f__Fusobacteriaceae;g__Fusobacterium_A;s__Fusobacterium_A mortiferum	NA	2591399	29	2540	112	NA	18_1	0	0
392	ERR1620282_bin.30	Almeida et al., 2019	non-CRC	China	98.88	1.12	d__Bacteria;p__Fusobacteriota;c__Fusobacteriia;o__Fusobacteriales;f__Fusobacteriaceae;g__Fusobacterium_A;s__Fusobacterium_A mortiferum	NA	2646844	28.9	2566	52	NA	18_1	0	0
393	ERR1620289_bin.7	Almeida et al., 2019	non-CRC	China	94.38	3.93	d__Bacteria;p__Fusobacteriota;c__Fusobacteriia;o__Fusobacteriales;f__Fusobacteriaceae;g__Fusobacterium_A;s__Fusobacterium_A mortiferum	NA	2370505	29.5	2475	369	NA	18_1	0	0
394	ERR1620295_bin.26	Almeida et al., 2019	non-CRC	China	91.09	1.12	d__Bacteria;p__Fusobacteriota;c__Fusobacteriia;o__Fusobacteriales;f__Fusobacteriaceae;g__Fusobacterium_A;s__Fusobacterium_A mortiferum	NA	2661752	28.9	2561	74	NA	18_1	0	0
395	ERR1620310_bin.41	Almeida et al., 2019	non-CRC	China	95.51	2.25	d__Bacteria;p__Fusobacteriota;c__Fusobacteriia;o__Fusobacteriales;f__Fusobacteriaceae;g__Fusobacterium_A;s__Fusobacterium_A mortiferum	NA	2436285	29.3	2318	99	NA	18_1	0	0
396	ERR1620317_bin.33	Almeida et al., 2019	non-CRC	China	93.31	1.12	d__Bacteria;p__Fusobacteriota;c__Fusobacteriia;o__Fusobacteriales;f__Fusobacteriaceae;g__Fusobacterium_A;s__Fusobacterium_A mortiferum	NA	2538623	29.3	2481	184	NA	18_1	0	0
397	ERR1620320_bin.4	Almeida et al., 2019	non-CRC	China	98.88	1.12	d__Bacteria;p__Fusobacteriota;c__Fusobacteriia;o__Fusobacteriales;f__Fusobacteriaceae;g__Fusobacterium_A;s__Fusobacterium_A mortiferum	NA	2483527	29.2	2361	56	NA	18_1	0	0
398	ERR1620327_bin.4	Almeida et al., 2019	non-CRC	China	92.13	2.25	d__Bacteria;p__Fusobacteriota;c__Fusobacteriia;o__Fusobacteriales;f__Fusobacteriaceae;g__Fusobacterium_A;s__Fusobacterium_A mortiferum	NA	2491246	29	2332	76	NA	18_1	0	0
399	ERR1620348_bin.44	Almeida et al., 2019	non-CRC	China	92.13	1.12	d__Bacteria;p__Fusobacteriota;c__Fusobacteriia;o__Fusobacteriales;f__Fusobacteriaceae;g__Fusobacterium_A;s__Fusobacterium_A mortiferum	NA	2463867	29.2	2413	206	NA	18_1	0	0
400	ERR1620351_bin.32	Almeida et al., 2019	non-CRC	China	98.88	1.12	d__Bacteria;p__Fusobacteriota;c__Fusobacteriia;o__Fusobacteriales;f__Fusobacteriaceae;g__Fusobacterium_A;s__Fusobacterium_A mortiferum	NA	2648384	29.2	2580	139	NA	18_1	0	0
401	ERR1620373_bin.22	Almeida et al., 2019	non-CRC	China	98.88	1.12	d__Bacteria;p__Fusobacteriota;c__Fusobacteriia;o__Fusobacteriales;f__Fusobacteriaceae;g__Fusobacterium_A;s__Fusobacterium_A mortiferum	NA	2587114	29.1	2494	96	NA	18_1	0	0
402	SRR1196519_bin.2	Almeida et al., 2019	non-CRC	USA	95.51	1.12	d__Bacteria;p__Fusobacteriota;c__Fusobacteriia;o__Fusobacteriales;f__Fusobacteriaceae;g__Fusobacterium_A;s__Fusobacterium_A mortiferum	NA	2117146	29.2	1965	49	NA	18_1	0	0
403	SRR1196614_bin.2	Almeida et al., 2019	non-CRC	USA	92.13	1.5	d__Bacteria;p__Fusobacteriota;c__Fusobacteriia;o__Fusobacteriales;f__Fusobacteriaceae;g__Fusobacterium_A;s__Fusobacterium_A mortiferum	NA	2080911	29.3	2224	391	NA	18_1	0	0
404	SRR1197016_bin.9	Almeida et al., 2019	non-CRC	USA	94.58	2.25	d__Bacteria;p__Fusobacteriota;c__Fusobacteriia;o__Fusobacteriales;f__Fusobacteriaceae;g__Fusobacterium_A;s__Fusobacterium_A mortiferum	NA	2170392	29.2	2229	373	NA	18_1	0	0
405	SRR1197027_bin.15	Almeida et al., 2019	non-CRC	USA	92.13	3.37	d__Bacteria;p__Fusobacteriota;c__Fusobacteriia;o__Fusobacteriales;f__Fusobacteriaceae;g__Fusobacterium_A;s__Fusobacterium_A mortiferum	NA	2116318	29.2	2227	353	NA	18_1	0	0
406	SRR1197044_bin.10	Almeida et al., 2019	non-CRC	USA	90.07	3.37	d__Bacteria;p__Fusobacteriota;c__Fusobacteriia;o__Fusobacteriales;f__Fusobacteriaceae;g__Fusobacterium_A;s__Fusobacterium_A mortiferum	NA	2075689	29.2	2222	377	NA	18_1	0	0
407	SRR1197069_bin.12	Almeida et al., 2019	non-CRC	USA	94.66	1.12	d__Bacteria;p__Fusobacteriota;c__Fusobacteriia;o__Fusobacteriales;f__Fusobacteriaceae;g__Fusobacterium_A;s__Fusobacterium_A mortiferum	NA	2126508	29.2	2252	374	NA	18_1	0	0
408	SRR1197583_bin.1	Almeida et al., 2019	non-CRC	USA	93.26	1.69	d__Bacteria;p__Fusobacteriota;c__Fusobacteriia;o__Fusobacteriales;f__Fusobacteriaceae;g__Fusobacterium_A;s__Fusobacterium_A mortiferum	NA	2159471	29.2	2262	346	NA	18_1	0	0
409	SRR1197620_bin.6	Almeida et al., 2019	non-CRC	USA	92.13	1.12	d__Bacteria;p__Fusobacteriota;c__Fusobacteriia;o__Fusobacteriales;f__Fusobacteriaceae;g__Fusobacterium_A;s__Fusobacterium_A mortiferum	NA	2063969	29.2	2193	367	NA	18_1	0	0
410	SRR1197639_bin.1	Almeida et al., 2019	non-CRC	USA	94.94	2.62	d__Bacteria;p__Fusobacteriota;c__Fusobacteriia;o__Fusobacteriales;f__Fusobacteriaceae;g__Fusobacterium_A;s__Fusobacterium_A mortiferum	NA	2110882	29.2	2257	385	NA	18_1	0	0
411	SRR1197713_bin.21	Almeida et al., 2019	non-CRC	USA	90.45	0	d__Bacteria;p__Fusobacteriota;c__Fusobacteriia;o__Fusobacteriales;f__Fusobacteriaceae;g__Fusobacterium_A;s__Fusobacterium_A mortiferum	NA	2121589	29.2	2227	346	NA	18_1	0	0
412	SRR1197725_bin.15	Almeida et al., 2019	non-CRC	USA	94.38	0	d__Bacteria;p__Fusobacteriota;c__Fusobacteriia;o__Fusobacteriales;f__Fusobacteriaceae;g__Fusobacterium_A;s__Fusobacterium_A mortiferum	NA	2172962	29.2	2302	372	NA	18_1	0	0
413	SRR341659_bin.12	Almeida et al., 2019	non-CRC	China	93.26	1.12	d__Bacteria;p__Fusobacteriota;c__Fusobacteriia;o__Fusobacteriales;f__Fusobacteriaceae;g__Fusobacterium_A;s__Fusobacterium_A mortiferum	NA	2455402	29.1	2354	161	NA	18_1	0	0
414	SRR341693_bin.11	Almeida et al., 2019	non-CRC	China	96.63	1.12	d__Bacteria;p__Fusobacteriota;c__Fusobacteriia;o__Fusobacteriales;f__Fusobacteriaceae;g__Fusobacterium_A;s__Fusobacterium_A mortiferum	NA	2490974	29.1	2396	112	NA	18_1	0	0
415	SRR341701_bin.6	Almeida et al., 2019	non-CRC	China	97.75	1.12	d__Bacteria;p__Fusobacteriota;c__Fusobacteriia;o__Fusobacteriales;f__Fusobacteriaceae;g__Fusobacterium_A;s__Fusobacterium_A mortiferum	NA	2680957	29	2676	171	NA	18_1	0	0
416	SRR3582161_bin.7	Almeida et al., 2019	non-CRC	USA	94.38	1.12	d__Bacteria;p__Fusobacteriota;c__Fusobacteriia;o__Fusobacteriales;f__Fusobacteriaceae;g__Fusobacterium_A;s__Fusobacterium_A mortiferum	NA	2110442	30.2	2138	345	NA	18_1	0	0
417	SRR5056845_bin.24	Almeida et al., 2019	non-CRC	USA	92.13	1.12	d__Bacteria;p__Fusobacteriota;c__Fusobacteriia;o__Fusobacteriales;f__Fusobacteriaceae;g__Fusobacterium_A;s__Fusobacterium_A mortiferum	NA	2369463	29.1	2429	263	NA	18_1	0	0
418	SRR5056888_bin.57	Almeida et al., 2019	non-CRC	USA	97.75	1.12	d__Bacteria;p__Fusobacteriota;c__Fusobacteriia;o__Fusobacteriales;f__Fusobacteriaceae;g__Fusobacterium_A;s__Fusobacterium_A mortiferum	NA	2297464	29.4	2364	298	NA	18_1	0	0
419	SRR5106303_bin.27	Almeida et al., 2019	non-CRC	China	93.26	4.61	d__Bacteria;p__Fusobacteriota;c__Fusobacteriia;o__Fusobacteriales;f__Fusobacteriaceae;g__Fusobacterium_A;s__Fusobacterium_A mortiferum	NA	2381224	29.5	2477	319	NA	18_1	0	0
420	SRR5275457_bin.5	Almeida et al., 2019	non-CRC	USA	92.58	1.35	d__Bacteria;p__Fusobacteriota;c__Fusobacteriia;o__Fusobacteriales;f__Fusobacteriaceae;g__Fusobacterium_A;s__Fusobacterium_A mortiferum	NA	2270562	29.5	2218	220	NA	18_1	0	0
421	ERR1018204_bin.17	Almeida et al., 2019	non-CRC	China	100	2.25	d__Bacteria;p__Fusobacteriota;c__Fusobacteriia;o__Fusobacteriales;f__Fusobacteriaceae;g__Fusobacterium_A;s__Fusobacterium_A ulcerans	NA	3310894	30.5	3190	121	NA	11_6	2	0
422	ERR1018237_bin.11	Almeida et al., 2019	non-CRC	China	92.13	2.25	d__Bacteria;p__Fusobacteriota;c__Fusobacteriia;o__Fusobacteriales;f__Fusobacteriaceae;g__Fusobacterium_A;s__Fusobacterium_A ulcerans	NA	2617621	30.7	2481	90	NA	11_6	2	0
423	ERR1190542_bin.3	Almeida et al., 2019	non-CRC	China	100	2.25	d__Bacteria;p__Fusobacteriota;c__Fusobacteriia;o__Fusobacteriales;f__Fusobacteriaceae;g__Fusobacterium_A;s__Fusobacterium_A ulcerans	NA	3192148	30.6	3152	270	NA	11_8	4	0
424	ERR1190611_bin.2	Almeida et al., 2019	non-CRC	China	100	3.37	d__Bacteria;p__Fusobacteriota;c__Fusobacteriia;o__Fusobacteriales;f__Fusobacteriaceae;g__Fusobacterium_A;s__Fusobacterium_A ulcerans	NA	3330500	30.5	3184	138	NA	11_5	2	0
425	ERR1190617_bin.44	Almeida et al., 2019	non-CRC	China	100	2.25	d__Bacteria;p__Fusobacteriota;c__Fusobacteriia;o__Fusobacteriales;f__Fusobacteriaceae;g__Fusobacterium_A;s__Fusobacterium_A ulcerans	NA	3486302	30.4	3293	86	NA	11_6	2	0
426	ERR1190903_bin.16	Almeida et al., 2019	non-CRC	China	100	4.49	d__Bacteria;p__Fusobacteriota;c__Fusobacteriia;o__Fusobacteriales;f__Fusobacteriaceae;g__Fusobacterium_A;s__Fusobacterium_A ulcerans	NA	3396333	30.4	3292	166	NA	11_6	3	0
427	ERR1190915_bin.37	Almeida et al., 2019	non-CRC	China	96.26	3.37	d__Bacteria;p__Fusobacteriota;c__Fusobacteriia;o__Fusobacteriales;f__Fusobacteriaceae;g__Fusobacterium_A;s__Fusobacterium_A ulcerans	NA	3324720	30.5	3211	150	NA	11_6	2	0
428	ERR1578662_bin.28	Almeida et al., 2019	non-CRC	China	100	2.25	d__Bacteria;p__Fusobacteriota;c__Fusobacteriia;o__Fusobacteriales;f__Fusobacteriaceae;g__Fusobacterium_A;s__Fusobacterium_A ulcerans	NA	3356296	30.3	3255	183	NA	11_8	4	0
429	ERR1620260_bin.3	Almeida et al., 2019	non-CRC	China	95.51	3.37	d__Bacteria;p__Fusobacteriota;c__Fusobacteriia;o__Fusobacteriales;f__Fusobacteriaceae;g__Fusobacterium_A;s__Fusobacterium_A ulcerans	NA	3149561	30.6	3110	316	NA	11_6	3	0
430	ERR1620271_bin.17	Almeida et al., 2019	non-CRC	China	100	3.37	d__Bacteria;p__Fusobacteriota;c__Fusobacteriia;o__Fusobacteriales;f__Fusobacteriaceae;g__Fusobacterium_A;s__Fusobacterium_A ulcerans	NA	3445364	30.3	3361	98	NA	11_8	3	0
431	ERR1620345_bin.48	Almeida et al., 2019	non-CRC	China	98.88	2.25	d__Bacteria;p__Fusobacteriota;c__Fusobacteriia;o__Fusobacteriales;f__Fusobacteriaceae;g__Fusobacterium_A;s__Fusobacterium_A ulcerans	NA	3206453	30.5	3134	215	NA	11_7	4	0
432	ERR2013604_bin.44	Almeida et al., 2019	non-CRC	China	90.45	2.25	d__Bacteria;p__Fusobacteriota;c__Fusobacteriia;o__Fusobacteriales;f__Fusobacteriaceae;g__Fusobacterium_A;s__Fusobacterium_A ulcerans	NA	3177935	30.5	3154	219	NA	11_5	3	0
433	ERR414375_bin.2	Almeida et al., 2019	non-CRC	Spain	100	2.25	d__Bacteria;p__Fusobacteriota;c__Fusobacteriia;o__Fusobacteriales;f__Fusobacteriaceae;g__Fusobacterium_A;s__Fusobacterium_A ulcerans	NA	3278171	30.5	3079	96	NA	11_7	4	0
434	SRR341588_bin.17	Almeida et al., 2019	non-CRC	China	98.88	2.25	d__Bacteria;p__Fusobacteriota;c__Fusobacteriia;o__Fusobacteriales;f__Fusobacteriaceae;g__Fusobacterium_A;s__Fusobacterium_A ulcerans	NA	3591354	30.3	3419	70	NA	11_6	3	0
435	SRR341677_bin.10	Almeida et al., 2019	non-CRC	China	100	2.25	d__Bacteria;p__Fusobacteriota;c__Fusobacteriia;o__Fusobacteriales;f__Fusobacteriaceae;g__Fusobacterium_A;s__Fusobacterium_A ulcerans	NA	3417643	30.4	3302	197	NA	11_8	4	0
436	ERR1620274_bin.23	Almeida et al., 2019	non-CRC	China	98.72	1.12	d__Bacteria;p__Fusobacteriota;c__Fusobacteriia;o__Fusobacteriales;f__Fusobacteriaceae;g__Fusobacterium_A;s__GCF_900015295.1	NA	1959286	28.5	1870	73	NA	15_1	0	0
437	SRR341607_bin.1	Almeida et al., 2019	non-CRC	China	95.51	1.12	d__Bacteria;p__Fusobacteriota;c__Fusobacteriia;o__Fusobacteriales;f__Fusobacteriaceae;g__Fusobacterium_A;s__GCF_900015295.1	NA	1920112	28.4	1806	61	NA	15_1	0	0
438	ERR1018207_bin.28	Almeida et al., 2019	non-CRC	China	99.44	1.12	d__Bacteria;p__Fusobacteriota;c__Fusobacteriia;o__Fusobacteriales;f__Fusobacteriaceae;g__Fusobacterium_B;s__	NA	2210835	31.5	2004	149	NA	6_2	0	0
439	ERR1018233_bin.63	Almeida et al., 2019	non-CRC	China	98.15	1.12	d__Bacteria;p__Fusobacteriota;c__Fusobacteriia;o__Fusobacteriales;f__Fusobacteriaceae;g__Fusobacterium_B;s__	NA	2231373	30	2196	199	NA	10_1	0	0
440	ERR1293677_bin.12	Almeida et al., 2019	non-CRC	USA	91.01	0	d__Bacteria;p__Fusobacteriota;c__Fusobacteriia;o__Fusobacteriales;f__Fusobacteriaceae;g__Fusobacterium_B;s__	NA	1603733	31.5	1569	383	NA	10_7	0	0
441	ERR1578622_bin.12	Almeida et al., 2019	non-CRC	China	95.51	0	d__Bacteria;p__Fusobacteriota;c__Fusobacteriia;o__Fusobacteriales;f__Fusobacteriaceae;g__Fusobacterium_B;s__	NA	1303108	30.6	1224	31	NA	10_10	0	0
442	ERR1620316_bin.3	Almeida et al., 2019	non-CRC	China	91.01	0	d__Bacteria;p__Fusobacteriota;c__Fusobacteriia;o__Fusobacteriales;f__Fusobacteriaceae;g__Fusobacterium_B;s__	NA	1835602	32.1	1802	225	NA	8_1	0	0
443	ERR1620317_bin.28	Almeida et al., 2019	non-CRC	China	94.38	1.12	d__Bacteria;p__Fusobacteriota;c__Fusobacteriia;o__Fusobacteriales;f__Fusobacteriaceae;g__Fusobacterium_B;s__	NA	2046382	31.7	1931	55	NA	8_1	0	0
444	ERS537231_106	Nayfach et al., 2019	non-CRC	China	98.88	1.12	d__Bacteria;p__Fusobacteriota;c__Fusobacteriia;o__Fusobacteriales;f__Fusobacteriaceae;g__Cetobacterium_A;s__Cetobacterium_A somerae	NA	2969940	28.6	2790	88	NA	2_4	0	0
445	ERS396482_11	Nayfach et al., 2019	non-CRC	Spain	98.86	0.57	d__Bacteria;p__Fusobacteriota;c__Fusobacteriia;o__Fusobacteriales;f__Fusobacteriaceae;g__Fusobacterium;s__Fusobacterium animalis	NA	2445563	26.7	2549	218	NA	23_13	1	0
446	SRS371640_3	Nayfach et al., 2019	non-CRC	USA	100	0	d__Bacteria;p__Fusobacteriota;c__Fusobacteriia;o__Fusobacteriales;f__Fusobacteriaceae;g__Fusobacterium;s__Fusobacterium animalis	NA	2256961	26.8	2096	65	NA	23_19	1	1
447	SRS373131_1	Nayfach et al., 2019	non-CRC	USA	100	0.57	d__Bacteria;p__Fusobacteriota;c__Fusobacteriia;o__Fusobacteriales;f__Fusobacteriaceae;g__Fusobacterium;s__Fusobacterium animalis	NA	2547384	26.8	2631	171	NA	23_13	1	0
448	ERS608583_20	Nayfach et al., 2019	non-CRC	Austria	98.88	0	d__Bacteria;p__Fusobacteriota;c__Fusobacteriia;o__Fusobacteriales;f__Fusobacteriaceae;g__Fusobacterium;s__GCF_000235465.1	NA	2065216	27.6	1978	97	NA	21_1	1	1
449	SRS259486_23	Nayfach et al., 2019	non-CRC	China	90.45	2.25	d__Bacteria;p__Fusobacteriota;c__Fusobacteriia;o__Fusobacteriales;f__Fusobacteriaceae;g__Fusobacterium_A;s__	NA	2290320	30.5	2191	116	NA	16_1	0	0
450	SRS259493_12	Nayfach et al., 2019	non-CRC	China	98.88	2.25	d__Bacteria;p__Fusobacteriota;c__Fusobacteriia;o__Fusobacteriales;f__Fusobacteriaceae;g__Fusobacterium_A;s__	NA	2826674	29.2	2678	208	NA	12_2	1	0
451	SRS294858_1	Nayfach et al., 2019	non-CRC	China	93.26	2.25	d__Bacteria;p__Fusobacteriota;c__Fusobacteriia;o__Fusobacteriales;f__Fusobacteriaceae;g__Fusobacterium_A;s__	NA	2136481	29.5	2056	123	NA	13_3	0	0
452	SRS294859_23	Nayfach et al., 2019	non-CRC	China	94.94	1.12	d__Bacteria;p__Fusobacteriota;c__Fusobacteriia;o__Fusobacteriales;f__Fusobacteriaceae;g__Fusobacterium_A;s__	NA	2907085	29.2	2768	195	NA	12_2	1	0
453	SRS294941_20	Nayfach et al., 2019	non-CRC	China	91.01	1.12	d__Bacteria;p__Fusobacteriota;c__Fusobacteriia;o__Fusobacteriales;f__Fusobacteriaceae;g__Fusobacterium_A;s__	NA	2681827	29.3	2522	144	NA	12_2	0	0
454	SRS294951_4	Nayfach et al., 2019	non-CRC	China	95.51	1.12	d__Bacteria;p__Fusobacteriota;c__Fusobacteriia;o__Fusobacteriales;f__Fusobacteriaceae;g__Fusobacterium_A;s__	NA	2920197	29.2	2753	142	NA	12_2	1	0
455	SRS294954_9	Nayfach et al., 2019	non-CRC	China	98.88	1.12	d__Bacteria;p__Fusobacteriota;c__Fusobacteriia;o__Fusobacteriales;f__Fusobacteriaceae;g__Fusobacterium_A;s__	NA	2763688	29.4	2687	308	NA	12_2	2	0
456	SRS294960_6	Nayfach et al., 2019	non-CRC	China	92.13	2.25	d__Bacteria;p__Fusobacteriota;c__Fusobacteriia;o__Fusobacteriales;f__Fusobacteriaceae;g__Fusobacterium_A;s__	NA	2824718	29.7	2960	751	NA	12_2	2	0
457	SRS294966_80	Nayfach et al., 2019	non-CRC	China	92.13	2.25	d__Bacteria;p__Fusobacteriota;c__Fusobacteriia;o__Fusobacteriales;f__Fusobacteriaceae;g__Fusobacterium_A;s__	NA	2071175	29.7	2011	252	NA	13_4	0	0
458	SRS295029_12	Nayfach et al., 2019	non-CRC	China	95.51	3.37	d__Bacteria;p__Fusobacteriota;c__Fusobacteriia;o__Fusobacteriales;f__Fusobacteriaceae;g__Fusobacterium_A;s__	NA	2220194	29.5	2107	187	NA	13_1	0	0
459	ERS396467_52	Nayfach et al., 2019	non-CRC	Spain	90.45	1.69	d__Bacteria;p__Fusobacteriota;c__Fusobacteriia;o__Fusobacteriales;f__Fusobacteriaceae;g__Fusobacterium_A;s__Fusobacterium_A mortiferum	NA	2509667	29	2430	117	NA	18_1	0	0
460	ERS396468_18	Nayfach et al., 2019	non-CRC	Spain	93.26	1.69	d__Bacteria;p__Fusobacteriota;c__Fusobacteriia;o__Fusobacteriales;f__Fusobacteriaceae;g__Fusobacterium_A;s__Fusobacterium_A mortiferum	NA	2557843	29	2444	80	NA	18_1	0	0
461	ERS537191_22	Nayfach et al., 2019	non-CRC	China	94.38	1.12	d__Bacteria;p__Fusobacteriota;c__Fusobacteriia;o__Fusobacteriales;f__Fusobacteriaceae;g__Fusobacterium_A;s__Fusobacterium_A mortiferum	NA	2243280	29.3	2259	224	NA	18_1	0	0
462	ERS537324_31	Nayfach et al., 2019	non-CRC	China	96.63	2.25	d__Bacteria;p__Fusobacteriota;c__Fusobacteriia;o__Fusobacteriales;f__Fusobacteriaceae;g__Fusobacterium_A;s__Fusobacterium_A mortiferum	NA	2416528	29.1	2340	176	NA	18_1	0	0
463	ERS537384_28	Nayfach et al., 2019	non-CRC	China	96.63	1.12	d__Bacteria;p__Fusobacteriota;c__Fusobacteriia;o__Fusobacteriales;f__Fusobacteriaceae;g__Fusobacterium_A;s__Fusobacterium_A mortiferum	NA	2575144	29.1	2491	101	NA	18_1	0	0
464	SRS017433_36	Nayfach et al., 2019	non-CRC	USA	94.94	0	d__Bacteria;p__Fusobacteriota;c__Fusobacteriia;o__Fusobacteriales;f__Fusobacteriaceae;g__Fusobacterium_A;s__Fusobacterium_A mortiferum	NA	2122318	29.9	2263	709	NA	18_1	0	0
465	SRS023176_24	Nayfach et al., 2019	non-CRC	USA	92.7	1.12	d__Bacteria;p__Fusobacteriota;c__Fusobacteriia;o__Fusobacteriales;f__Fusobacteriaceae;g__Fusobacterium_A;s__Fusobacterium_A mortiferum	NA	2006572	30.4	2107	677	NA	18_2	0	0
466	SRS1596871_24	Nayfach et al., 2019	non-CRC	China	94.94	1.12	d__Bacteria;p__Fusobacteriota;c__Fusobacteriia;o__Fusobacteriales;f__Fusobacteriaceae;g__Fusobacterium_A;s__Fusobacterium_A mortiferum	NA	2298020	30.4	2406	637	NA	18_1	0	0
467	SRS259437_4	Nayfach et al., 2019	non-CRC	China	93.26	1.12	d__Bacteria;p__Fusobacteriota;c__Fusobacteriia;o__Fusobacteriales;f__Fusobacteriaceae;g__Fusobacterium_A;s__Fusobacterium_A mortiferum	NA	2444488	29	2440	259	NA	18_1	0	0
468	SRS259505_35	Nayfach et al., 2019	non-CRC	China	96.63	2.25	d__Bacteria;p__Fusobacteriota;c__Fusobacteriia;o__Fusobacteriales;f__Fusobacteriaceae;g__Fusobacterium_A;s__Fusobacterium_A mortiferum	NA	2588363	28.8	2520	137	NA	18_1	0	0
469	SRS259512_3	Nayfach et al., 2019	non-CRC	China	93.26	1.12	d__Bacteria;p__Fusobacteriota;c__Fusobacteriia;o__Fusobacteriales;f__Fusobacteriaceae;g__Fusobacterium_A;s__Fusobacterium_A mortiferum	NA	2449789	29.2	2389	273	NA	18_1	0	0
470	SRS259515_37	Nayfach et al., 2019	non-CRC	China	93.26	1.12	d__Bacteria;p__Fusobacteriota;c__Fusobacteriia;o__Fusobacteriales;f__Fusobacteriaceae;g__Fusobacterium_A;s__Fusobacterium_A mortiferum	NA	2385001	29.1	2363	176	NA	18_1	0	0
471	SRS259538_7	Nayfach et al., 2019	non-CRC	China	95.51	2.25	d__Bacteria;p__Fusobacteriota;c__Fusobacteriia;o__Fusobacteriales;f__Fusobacteriaceae;g__Fusobacterium_A;s__Fusobacterium_A mortiferum	NA	2391088	29.2	2334	102	NA	18_5	0	0
472	SRS259554_21	Nayfach et al., 2019	non-CRC	China	94.38	1.12	d__Bacteria;p__Fusobacteriota;c__Fusobacteriia;o__Fusobacteriales;f__Fusobacteriaceae;g__Fusobacterium_A;s__Fusobacterium_A mortiferum	NA	2650060	29	2684	244	NA	18_1	0	0
473	SRS294816_53	Nayfach et al., 2019	non-CRC	China	93.26	1.12	d__Bacteria;p__Fusobacteriota;c__Fusobacteriia;o__Fusobacteriales;f__Fusobacteriaceae;g__Fusobacterium_A;s__Fusobacterium_A mortiferum	NA	2468771	29.2	2395	119	NA	18_3	0	0
474	SRS294933_50	Nayfach et al., 2019	non-CRC	China	92.13	1.12	d__Bacteria;p__Fusobacteriota;c__Fusobacteriia;o__Fusobacteriales;f__Fusobacteriaceae;g__Fusobacterium_A;s__Fusobacterium_A mortiferum	NA	2256850	29.6	2430	579	NA	18_1	0	0
475	SRS294948_5	Nayfach et al., 2019	non-CRC	China	98.88	1.12	d__Bacteria;p__Fusobacteriota;c__Fusobacteriia;o__Fusobacteriales;f__Fusobacteriaceae;g__Fusobacterium_A;s__Fusobacterium_A mortiferum	NA	2527829	29.1	2417	86	NA	18_1	0	0
476	SRS294986_28	Nayfach et al., 2019	non-CRC	China	98.88	1.12	d__Bacteria;p__Fusobacteriota;c__Fusobacteriia;o__Fusobacteriales;f__Fusobacteriaceae;g__Fusobacterium_A;s__Fusobacterium_A mortiferum	NA	2561352	29.3	2542	338	NA	18_1	0	0
477	SRS475568_13	Nayfach et al., 2019	non-CRC	Fiji	98.88	1.12	d__Bacteria;p__Fusobacteriota;c__Fusobacteriia;o__Fusobacteriales;f__Fusobacteriaceae;g__Fusobacterium_A;s__Fusobacterium_A mortiferum	NA	2617724	29.1	2539	79	NA	18_1	0	0
478	SRS475586_14	Nayfach et al., 2019	non-CRC	Fiji	95.51	0	d__Bacteria;p__Fusobacteriota;c__Fusobacteriia;o__Fusobacteriales;f__Fusobacteriaceae;g__Fusobacterium_A;s__Fusobacterium_A mortiferum	NA	2671050	28.9	2575	81	NA	18_1	0	0
479	ERS396425_6	Nayfach et al., 2019	non-CRC	Spain	98.88	2.25	d__Bacteria;p__Fusobacteriota;c__Fusobacteriia;o__Fusobacteriales;f__Fusobacteriaceae;g__Fusobacterium_A;s__Fusobacterium_A ulcerans	NA	3136695	30.5	2958	131	NA	11_7	4	0
480	ERS396509_3	Nayfach et al., 2019	non-CRC	Spain	98.88	2.25	d__Bacteria;p__Fusobacteriota;c__Fusobacteriia;o__Fusobacteriales;f__Fusobacteriaceae;g__Fusobacterium_A;s__Fusobacterium_A ulcerans	NA	3127713	30.5	3015	147	NA	11_8	3	0
481	ERS608532_1	Nayfach et al., 2019	non-CRC	Austria	100	2.25	d__Bacteria;p__Fusobacteriota;c__Fusobacteriia;o__Fusobacteriales;f__Fusobacteriaceae;g__Fusobacterium_A;s__Fusobacterium_A ulcerans	NA	3448502	30.2	3338	93	NA	11_8	4	0
482	SRS259441_4	Nayfach et al., 2019	non-CRC	China	100	2.25	d__Bacteria;p__Fusobacteriota;c__Fusobacteriia;o__Fusobacteriales;f__Fusobacteriaceae;g__Fusobacterium_A;s__Fusobacterium_A ulcerans	NA	3340376	30.3	3269	117	NA	11_6	3	0
483	SRS259530_16	Nayfach et al., 2019	non-CRC	China	97.75	2.25	d__Bacteria;p__Fusobacteriota;c__Fusobacteriia;o__Fusobacteriales;f__Fusobacteriaceae;g__Fusobacterium_A;s__Fusobacterium_A ulcerans	NA	3301459	30.6	3233	237	NA	11_8	3	0
484	SRS294827_15	Nayfach et al., 2019	non-CRC	China	98.88	2.25	d__Bacteria;p__Fusobacteriota;c__Fusobacteriia;o__Fusobacteriales;f__Fusobacteriaceae;g__Fusobacterium_A;s__Fusobacterium_A ulcerans	NA	3251573	30.2	3211	157	NA	11_8	3	0
485	ERS537391_51	Nayfach et al., 2019	non-CRC	China	98.88	2.25	d__Bacteria;p__Fusobacteriota;c__Fusobacteriia;o__Fusobacteriales;f__Fusobacteriaceae;g__Fusobacterium_A;s__Fusobacterium_A varium_A	NA	3218254	29.2	3225	344	NA	12_1	3	0
486	ERS537408_29	Nayfach et al., 2019	non-CRC	China	96.63	1.12	d__Bacteria;p__Fusobacteriota;c__Fusobacteriia;o__Fusobacteriales;f__Fusobacteriaceae;g__Fusobacterium_A;s__GCF_900015295.1	NA	1892473	28.6	1783	41	NA	15_1	0	0
487	SRS294861_7	Nayfach et al., 2019	non-CRC	China	96.63	1.12	d__Bacteria;p__Fusobacteriota;c__Fusobacteriia;o__Fusobacteriales;f__Fusobacteriaceae;g__Fusobacterium_A;s__GCF_900015295.1	NA	1846813	28.5	1793	114	NA	15_1	0	0
488	ERS473221_41	Nayfach et al., 2019	non-CRC	Sweden	100	4.09	d__Bacteria;p__Fusobacteriota;c__Fusobacteriia;o__Fusobacteriales;f__Fusobacteriaceae;g__Fusobacterium_B;s__	NA	2595353	28.2	2654	276	NA	14_0	0	0
489	ERS537392_50	Nayfach et al., 2019	non-CRC	China	97.75	0	d__Bacteria;p__Fusobacteriota;c__Fusobacteriia;o__Fusobacteriales;f__Fusobacteriaceae;g__Fusobacterium_B;s__	NA	1411115	29.6	1281	30	NA	9_1	0	0
490	ERS396508_21	Nayfach et al., 2019	non-CRC	Spain	96.07	1.12	d__Bacteria;p__Fusobacteriota;c__Fusobacteriia;o__Fusobacteriales;f__Fusobacteriaceae;g__Fusobacterium_C;s__Fusobacterium_C gonidiaformans	NA	1803860	32.6	1862	144	NA	4_3	0	0
491	ERS396531_10	Nayfach et al., 2019	non-CRC	Spain	98.88	0	d__Bacteria;p__Fusobacteriota;c__Fusobacteriia;o__Fusobacteriales;f__Fusobacteriaceae;g__Fusobacterium_C;s__Fusobacterium_C necrophorum	NA	1894601	35.1	1802	53	NA	5_3	0	0
492	HeQ_2017__RSZAXPI003079-113__bin.19	Pasolli et al., 2019	non-CRC	China	96.07	3	d__Bacteria;p__Fusobacteriota;c__Fusobacteriia;o__Fusobacteriales;f__Fusobacteriaceae;g__Cetobacterium_A;s__Cetobacterium_A somerae	NA	2747166	28.7	2762	194	NA	2_2	0	0
493	QinN_2014__HV-27__bin.17	Pasolli et al., 2019	non-CRC	China	97.75	1.12	d__Bacteria;p__Fusobacteriota;c__Fusobacteriia;o__Fusobacteriales;f__Fusobacteriaceae;g__Cetobacterium_A;s__Cetobacterium_A somerae	NA	3195705	28.6	3102	112	NA	2_2	0	0
494	YuJ_2015__SZAXPI015255-46__bin.49	Pasolli et al., 2019	non-CRC	China	98.88	0	d__Bacteria;p__Fusobacteriota;c__Fusobacteriia;o__Fusobacteriales;f__Fusobacteriaceae;g__Cetobacterium_A;s__Cetobacterium_A somerae	NA	3259458	28.4	3141	92	NA	2_1	0	0
495	CM_periimplantitis__SP_264SPI_T016__bin.4	Pasolli et al., 2019	non-CRC	Italy	96.63	0	d__Bacteria;p__Fusobacteriota;c__Fusobacteriia;o__Fusobacteriales;f__Fusobacteriaceae;g__Fusobacterium;s__	NA	2033211	26.7	1985	141	NA	23_11	1	0
496	HMP_2012__SRS011343__bin.54	Pasolli et al., 2019	non-CRC	USA	96.55	4.7	d__Bacteria;p__Fusobacteriota;c__Fusobacteriia;o__Fusobacteriales;f__Fusobacteriaceae;g__Fusobacterium;s__	NA	2149896	27.3	2274	477	NA	23_63	0	0
497	HMP_2012__SRS013879__bin.12	Pasolli et al., 2019	non-CRC	USA	91.91	1.12	d__Bacteria;p__Fusobacteriota;c__Fusobacteriia;o__Fusobacteriales;f__Fusobacteriaceae;g__Fusobacterium;s__	NA	1656637	28.5	1722	420	NA	21_43	1	0
498	HMP_2012__SRS015061__bin.8	Pasolli et al., 2019	non-CRC	USA	97.75	0.27	d__Bacteria;p__Fusobacteriota;c__Fusobacteriia;o__Fusobacteriales;f__Fusobacteriaceae;g__Fusobacterium;s__	NA	2040441	26.8	2029	244	NA	23_12	1	0
499	HMP_2012__SRS015644__bin.15	Pasolli et al., 2019	non-CRC	USA	96.63	1.69	d__Bacteria;p__Fusobacteriota;c__Fusobacteriia;o__Fusobacteriales;f__Fusobacteriaceae;g__Fusobacterium;s__	NA	2208213	27.7	2287	380	NA	21_35	1	0
500	HMP_2012__SRS017439__bin.41	Pasolli et al., 2019	non-CRC	USA	91.57	1.12	d__Bacteria;p__Fusobacteriota;c__Fusobacteriia;o__Fusobacteriales;f__Fusobacteriaceae;g__Fusobacterium;s__	NA	1750208	28.3	1796	401	NA	21_45	1	0
501	HMP_2012__SRS018300__bin.72	Pasolli et al., 2019	non-CRC	USA	91.01	1.12	d__Bacteria;p__Fusobacteriota;c__Fusobacteriia;o__Fusobacteriales;f__Fusobacteriaceae;g__Fusobacterium;s__	NA	2210170	28	2320	353	NA	21_59	1	0
502	HMP_2012__SRS019073__bin.24	Pasolli et al., 2019	non-CRC	USA	97.19	4.68	d__Bacteria;p__Fusobacteriota;c__Fusobacteriia;o__Fusobacteriales;f__Fusobacteriaceae;g__Fusobacterium;s__	NA	2017710	26.8	2077	191	NA	23_78	1	0
503	HMP_2012__SRS020856__bin.44	Pasolli et al., 2019	non-CRC	USA	97.75	1.69	d__Bacteria;p__Fusobacteriota;c__Fusobacteriia;o__Fusobacteriales;f__Fusobacteriaceae;g__Fusobacterium;s__	NA	2610459	28.1	2638	290	NA	21_27	1	0
504	HMP_2012__SRS022530__bin.42	Pasolli et al., 2019	non-CRC	USA	92.13	0.56	d__Bacteria;p__Fusobacteriota;c__Fusobacteriia;o__Fusobacteriales;f__Fusobacteriaceae;g__Fusobacterium;s__	NA	2279646	27.9	2289	282	NA	21_26	1	0
505	HMP_2012__SRS024277__bin.17	Pasolli et al., 2019	non-CRC	USA	96.63	0.56	d__Bacteria;p__Fusobacteriota;c__Fusobacteriia;o__Fusobacteriales;f__Fusobacteriaceae;g__Fusobacterium;s__	NA	1803327	28.4	1846	387	NA	21_47	1	0
506	HMP_2012__SRS057692__bin.52	Pasolli et al., 2019	non-CRC	USA	93.15	1.12	d__Bacteria;p__Fusobacteriota;c__Fusobacteriia;o__Fusobacteriales;f__Fusobacteriaceae;g__Fusobacterium;s__	NA	2077919	28.3	2175	458	NA	21_24	0	0
507	CM_periimplantitis__SP_285SPI_T016__bin.7	Pasolli et al., 2019	non-CRC	Italy	92.05	0	d__Bacteria;p__Fusobacteriota;c__Fusobacteriia;o__Fusobacteriales;f__Fusobacteriaceae;g__Fusobacterium;s__Fusobacterium animalis	NA	2030772	27.2	2200	460	NA	23_36	0	0
508	CM_periimplantitis__SP_387SPT_T016__bin.21	Pasolli et al., 2019	non-CRC	Italy	90.91	0.68	d__Bacteria;p__Fusobacteriota;c__Fusobacteriia;o__Fusobacteriales;f__Fusobacteriaceae;g__Fusobacterium;s__Fusobacterium animalis	NA	1664290	28.2	1713	449	NA	23_24	0	0
509	GeversD_2014__SKBSTL007__bin.7	Pasolli et al., 2019	non-CRC	USA	97.73	0	d__Bacteria;p__Fusobacteriota;c__Fusobacteriia;o__Fusobacteriales;f__Fusobacteriaceae;g__Fusobacterium;s__Fusobacterium animalis	NA	2252241	27	2215	242	NA	23_19	1	0
510	HeQ_2017__SZAXPI029474-42__bin.14	Pasolli et al., 2019	non-CRC	China	96.59	1.19	d__Bacteria;p__Fusobacteriota;c__Fusobacteriia;o__Fusobacteriales;f__Fusobacteriaceae;g__Fusobacterium;s__Fusobacterium animalis	NA	2782979	27	2842	366	NA	23_20	1	1
511	HeQ_2017__SZAXPI029494-94__bin.7	Pasolli et al., 2019	non-CRC	China	100	0.57	d__Bacteria;p__Fusobacteriota;c__Fusobacteriia;o__Fusobacteriales;f__Fusobacteriaceae;g__Fusobacterium;s__Fusobacterium animalis	NA	2487661	26.8	2317	49	NA	23_16	1	1
512	LiJ_2014__V1.CD5-0-PN__bin.29	Pasolli et al., 2019	non-CRC	China	97.73	0.57	d__Bacteria;p__Fusobacteriota;c__Fusobacteriia;o__Fusobacteriales;f__Fusobacteriaceae;g__Fusobacterium;s__Fusobacterium animalis	NA	2340402	26.8	2393	150	NA	23_13	1	0
513	NielsenHB_2014__V1_CD18_3__bin.16	Pasolli et al., 2019	non-CRC	Denmark	100	0	d__Bacteria;p__Fusobacteriota;c__Fusobacteriia;o__Fusobacteriales;f__Fusobacteriaceae;g__Fusobacterium;s__Fusobacterium animalis	NA	2571955	26.8	2564	118	NA	23_18	1	0
514	NielsenHB_2014__V1_CD25_0__bin.15	Pasolli et al., 2019	non-CRC	Denmark	94.32	0.16	d__Bacteria;p__Fusobacteriota;c__Fusobacteriia;o__Fusobacteriales;f__Fusobacteriaceae;g__Fusobacterium;s__Fusobacterium animalis	NA	2067118	27	2135	381	NA	23_32	1	1
515	NielsenHB_2014__V1_CD35_1__bin.24	Pasolli et al., 2019	non-CRC	Denmark	100	0.57	d__Bacteria;p__Fusobacteriota;c__Fusobacteriia;o__Fusobacteriales;f__Fusobacteriaceae;g__Fusobacterium;s__Fusobacterium animalis	NA	2381816	26.7	2392	113	NA	23_13	1	0
516	QinN_2014__LD-28__bin.16	Pasolli et al., 2019	non-CRC	China	100	1.14	d__Bacteria;p__Fusobacteriota;c__Fusobacteriia;o__Fusobacteriales;f__Fusobacteriaceae;g__Fusobacterium;s__Fusobacterium animalis	NA	2339029	26.8	2276	43	NA	23_28	1	0
517	HMP_2012__SRS013946__bin.14	Pasolli et al., 2019	non-CRC	USA	97.75	1.12	d__Bacteria;p__Fusobacteriota;c__Fusobacteriia;o__Fusobacteriales;f__Fusobacteriaceae;g__Fusobacterium;s__Fusobacterium massiliense	NA	1719225	27	1626	111	NA	20_2	1	0
518	CM_periimplantitis__SP_305SPI_T016__bin.16	Pasolli et al., 2019	non-CRC	Italy	98.76	1.12	d__Bacteria;p__Fusobacteriota;c__Fusobacteriia;o__Fusobacteriales;f__Fusobacteriaceae;g__Fusobacterium;s__Fusobacterium nucleatum	NA	2199364	27.1	2262	323	NA	23_44	1	1
519	HMP_2012__SRS065099__bin.53	Pasolli et al., 2019	non-CRC	USA	93.82	3.26	d__Bacteria;p__Fusobacteriota;c__Fusobacteriia;o__Fusobacteriales;f__Fusobacteriaceae;g__Fusobacterium;s__Fusobacterium nucleatum_A	NA	2491483	26.6	2637	336	NA	23_75	1	0
520	HMP_2012__SRS016043__bin.3	Pasolli et al., 2019	non-CRC	USA	94.38	2.81	d__Bacteria;p__Fusobacteriota;c__Fusobacteriia;o__Fusobacteriales;f__Fusobacteriaceae;g__Fusobacterium;s__Fusobacterium nucleatum_B	NA	2584978	27.3	2809	450	NA	23_69	1	0
521	HMP_2012__SRS051930__bin.28	Pasolli et al., 2019	non-CRC	USA	97.75	0	d__Bacteria;p__Fusobacteriota;c__Fusobacteriia;o__Fusobacteriales;f__Fusobacteriaceae;g__Fusobacterium;s__Fusobacterium nucleatum_B	NA	2165572	26.8	2157	112	NA	23_64	1	1
522	YuJ_2015__SZAXPI015237-23__bin.34	Pasolli et al., 2019	non-CRC	China	97.19	1.12	d__Bacteria;p__Fusobacteriota;c__Fusobacteriia;o__Fusobacteriales;f__Fusobacteriaceae;g__Fusobacterium;s__Fusobacterium nucleatum_E	NA	2287738	27.3	2442	446	NA	22_1	1	0
523	CM_periimplantitis__SP_163SPI_T016__bin.2	Pasolli et al., 2019	non-CRC	Italy	96.07	1.12	d__Bacteria;p__Fusobacteriota;c__Fusobacteriia;o__Fusobacteriales;f__Fusobacteriaceae;g__Fusobacterium;s__Fusobacterium nucleatum_H	NA	2025689	26.9	2122	353	NA	23_10	1	1
524	CM_periimplantitis__SP_403SPT_T016__bin.3	Pasolli et al., 2019	non-CRC	Italy	98.88	2.62	d__Bacteria;p__Fusobacteriota;c__Fusobacteriia;o__Fusobacteriales;f__Fusobacteriaceae;g__Fusobacterium;s__Fusobacterium nucleatum_H	NA	2052855	27.2	2086	342	NA	23_7	1	0
525	HMP_2012__SRS015062__bin.2	Pasolli et al., 2019	non-CRC	USA	96.07	1.85	d__Bacteria;p__Fusobacteriota;c__Fusobacteriia;o__Fusobacteriales;f__Fusobacteriaceae;g__Fusobacterium;s__Fusobacterium nucleatum_H	NA	1799008	27.2	1969	452	NA	23_4	1	0
526	HMP_2012__SRS014477__bin.8	Pasolli et al., 2019	non-CRC	USA	90.45	2.36	d__Bacteria;p__Fusobacteriota;c__Fusobacteriia;o__Fusobacteriales;f__Fusobacteriaceae;g__Fusobacterium;s__Fusobacterium nucleatum_I	NA	2110832	27.1	2272	457	NA	23_4	1	1
527	Castro-NallarE_2015__ES_114__bin.5	Pasolli et al., 2019	non-CRC	USA	95.13	2.86	d__Bacteria;p__Fusobacteriota;c__Fusobacteriia;o__Fusobacteriales;f__Fusobacteriaceae;g__Fusobacterium;s__Fusobacterium periodonticum	NA	2391031	28.1	2566	511	NA	21_22	1	0
528	CM_cf__CF_TNFC040IS_t3M15__bin.13	Pasolli et al., 2019	non-CRC	Italy	98.88	0	d__Bacteria;p__Fusobacteriota;c__Fusobacteriia;o__Fusobacteriales;f__Fusobacteriaceae;g__Fusobacterium;s__Fusobacterium periodonticum	NA	2020052	28.2	2120	407	NA	21_37	0	0
529	HMP_2012__SRS011140__bin.15	Pasolli et al., 2019	non-CRC	USA	91.57	0	d__Bacteria;p__Fusobacteriota;c__Fusobacteriia;o__Fusobacteriales;f__Fusobacteriaceae;g__Fusobacterium;s__Fusobacterium periodonticum	NA	2099514	28	2237	448	NA	21_29	1	0
530	HMP_2012__SRS011243__bin.1	Pasolli et al., 2019	non-CRC	USA	97.75	0.56	d__Bacteria;p__Fusobacteriota;c__Fusobacteriia;o__Fusobacteriales;f__Fusobacteriaceae;g__Fusobacterium;s__Fusobacterium periodonticum	NA	2283999	28.2	2324	348	NA	21_30	0	1
531	HMP_2012__SRS011306__bin.55	Pasolli et al., 2019	non-CRC	USA	96.07	0	d__Bacteria;p__Fusobacteriota;c__Fusobacteriia;o__Fusobacteriales;f__Fusobacteriaceae;g__Fusobacterium;s__Fusobacterium periodonticum	NA	1861846	28.4	1931	361	NA	21_40	1	0
532	HMP_2012__SRS013945__bin.15	Pasolli et al., 2019	non-CRC	USA	94.38	1.12	d__Bacteria;p__Fusobacteriota;c__Fusobacteriia;o__Fusobacteriales;f__Fusobacteriaceae;g__Fusobacterium;s__Fusobacterium periodonticum	NA	2221710	27.8	2240	267	NA	21_34	1	1
533	HMP_2012__SRS013947__bin.20	Pasolli et al., 2019	non-CRC	USA	93.82	2.25	d__Bacteria;p__Fusobacteriota;c__Fusobacteriia;o__Fusobacteriales;f__Fusobacteriaceae;g__Fusobacterium;s__Fusobacterium periodonticum	NA	2283358	27.8	2242	182	NA	21_34	1	1
534	HMP_2012__SRS015762__bin.73	Pasolli et al., 2019	non-CRC	USA	93.82	1.8	d__Bacteria;p__Fusobacteriota;c__Fusobacteriia;o__Fusobacteriales;f__Fusobacteriaceae;g__Fusobacterium;s__Fusobacterium periodonticum	NA	2126436	28.5	2186	421	NA	21_53	0	0
535	HMP_2012__SRS016002__bin.10	Pasolli et al., 2019	non-CRC	USA	92.7	1.12	d__Bacteria;p__Fusobacteriota;c__Fusobacteriia;o__Fusobacteriales;f__Fusobacteriaceae;g__Fusobacterium;s__Fusobacterium periodonticum	NA	2121771	27.9	2162	291	NA	21_54	1	0
536	HMP_2012__SRS016037__bin.14	Pasolli et al., 2019	non-CRC	USA	97.75	0.56	d__Bacteria;p__Fusobacteriota;c__Fusobacteriia;o__Fusobacteriales;f__Fusobacteriaceae;g__Fusobacterium;s__Fusobacterium periodonticum	NA	2351675	27.8	2382	262	NA	21_32	1	0
537	HMP_2012__SRS016225__bin.41	Pasolli et al., 2019	non-CRC	USA	92.13	0.56	d__Bacteria;p__Fusobacteriota;c__Fusobacteriia;o__Fusobacteriales;f__Fusobacteriaceae;g__Fusobacterium;s__Fusobacterium periodonticum	NA	2208340	27.5	2286	455	NA	21_44	1	0
538	HMP_2012__SRS016501__bin.16	Pasolli et al., 2019	non-CRC	USA	94.94	3.37	d__Bacteria;p__Fusobacteriota;c__Fusobacteriia;o__Fusobacteriales;f__Fusobacteriaceae;g__Fusobacterium;s__Fusobacterium periodonticum	NA	2594413	28	2578	159	NA	21_25	1	1
539	HMP_2012__SRS016529__bin.22	Pasolli et al., 2019	non-CRC	USA	97.75	0.56	d__Bacteria;p__Fusobacteriota;c__Fusobacteriia;o__Fusobacteriales;f__Fusobacteriaceae;g__Fusobacterium;s__Fusobacterium periodonticum	NA	2281023	27.8	2204	198	NA	21_25	1	0
540	HMP_2012__SRS017120__bin.10	Pasolli et al., 2019	non-CRC	USA	91.57	4.06	d__Bacteria;p__Fusobacteriota;c__Fusobacteriia;o__Fusobacteriales;f__Fusobacteriaceae;g__Fusobacterium;s__Fusobacterium periodonticum	NA	1928136	28.9	2039	566	NA	21_20	0	0
541	HMP_2012__SRS017808__bin.48	Pasolli et al., 2019	non-CRC	USA	94.94	0	d__Bacteria;p__Fusobacteriota;c__Fusobacteriia;o__Fusobacteriales;f__Fusobacteriaceae;g__Fusobacterium;s__Fusobacterium periodonticum	NA	1951018	28.1	2012	327	NA	21_33	1	0
542	HMP_2012__SRS018357__bin.3	Pasolli et al., 2019	non-CRC	USA	94.94	1.12	d__Bacteria;p__Fusobacteriota;c__Fusobacteriia;o__Fusobacteriales;f__Fusobacteriaceae;g__Fusobacterium;s__Fusobacterium periodonticum	NA	2126349	27.8	2183	355	NA	21_31	1	0
543	HMP_2012__SRS018591__bin.29	Pasolli et al., 2019	non-CRC	USA	99.44	1.69	d__Bacteria;p__Fusobacteriota;c__Fusobacteriia;o__Fusobacteriales;f__Fusobacteriaceae;g__Fusobacterium;s__Fusobacterium periodonticum	NA	2457419	27.6	2564	286	NA	21_21	1	1
544	HMP_2012__SRS019045__bin.8	Pasolli et al., 2019	non-CRC	USA	96.63	0	d__Bacteria;p__Fusobacteriota;c__Fusobacteriia;o__Fusobacteriales;f__Fusobacteriaceae;g__Fusobacterium;s__Fusobacterium periodonticum	NA	2116405	28.1	2097	172	NA	21_18	1	1
545	HMP_2012__SRS019127__bin.22	Pasolli et al., 2019	non-CRC	USA	94.38	0.56	d__Bacteria;p__Fusobacteriota;c__Fusobacteriia;o__Fusobacteriales;f__Fusobacteriaceae;g__Fusobacterium;s__Fusobacterium periodonticum	NA	2264193	27.9	2326	361	NA	21_34	1	1
546	HMP_2012__SRS021496__bin.35	Pasolli et al., 2019	non-CRC	USA	90.45	0	d__Bacteria;p__Fusobacteriota;c__Fusobacteriia;o__Fusobacteriales;f__Fusobacteriaceae;g__Fusobacterium;s__Fusobacterium periodonticum	NA	2158656	28.1	2261	418	NA	21_26	0	0
547	HMP_2012__SRS021954__bin.39	Pasolli et al., 2019	non-CRC	USA	93.26	2.81	d__Bacteria;p__Fusobacteriota;c__Fusobacteriia;o__Fusobacteriales;f__Fusobacteriaceae;g__Fusobacterium;s__Fusobacterium periodonticum	NA	2132588	28.7	2128	227	NA	21_36	1	1
548	HMP_2012__SRS023926__bin.12	Pasolli et al., 2019	non-CRC	USA	94.94	0.67	d__Bacteria;p__Fusobacteriota;c__Fusobacteriia;o__Fusobacteriales;f__Fusobacteriaceae;g__Fusobacterium;s__Fusobacterium periodonticum	NA	2063624	28.2	2111	384	NA	21_50	1	0
549	HMP_2012__SRS023958__bin.24	Pasolli et al., 2019	non-CRC	USA	91.01	3.22	d__Bacteria;p__Fusobacteriota;c__Fusobacteriia;o__Fusobacteriales;f__Fusobacteriaceae;g__Fusobacterium;s__Fusobacterium periodonticum	NA	1708632	28.8	1672	380	NA	21_49	0	0
550	HMP_2012__SRS024375__bin.4	Pasolli et al., 2019	non-CRC	USA	96.07	0	d__Bacteria;p__Fusobacteriota;c__Fusobacteriia;o__Fusobacteriales;f__Fusobacteriaceae;g__Fusobacterium;s__Fusobacterium periodonticum	NA	1989902	27.9	2053	375	NA	21_48	1	0
551	HMP_2012__SRS024441__bin.58	Pasolli et al., 2019	non-CRC	USA	94.94	0	d__Bacteria;p__Fusobacteriota;c__Fusobacteriia;o__Fusobacteriales;f__Fusobacteriaceae;g__Fusobacterium;s__Fusobacterium periodonticum	NA	1766239	28.6	1798	368	NA	21_38	1	0
552	HMP_2012__SRS024580__bin.13	Pasolli et al., 2019	non-CRC	USA	98.88	0	d__Bacteria;p__Fusobacteriota;c__Fusobacteriia;o__Fusobacteriales;f__Fusobacteriaceae;g__Fusobacterium;s__Fusobacterium periodonticum	NA	2328782	27.3	2335	171	NA	21_41	1	1
553	HMP_2012__SRS043663__bin.5	Pasolli et al., 2019	non-CRC	USA	97.19	0	d__Bacteria;p__Fusobacteriota;c__Fusobacteriia;o__Fusobacteriales;f__Fusobacteriaceae;g__Fusobacterium;s__Fusobacterium periodonticum	NA	2262374	27.9	2271	255	NA	21_55	1	1
554	HMP_2012__SRS050669__bin.36	Pasolli et al., 2019	non-CRC	USA	93.26	0.56	d__Bacteria;p__Fusobacteriota;c__Fusobacteriia;o__Fusobacteriales;f__Fusobacteriaceae;g__Fusobacterium;s__Fusobacterium periodonticum	NA	1945933	28.2	2014	396	NA	21_51	1	0
555	HMP_2012__SRS052227__bin.13	Pasolli et al., 2019	non-CRC	USA	93.26	1.85	d__Bacteria;p__Fusobacteriota;c__Fusobacteriia;o__Fusobacteriales;f__Fusobacteriaceae;g__Fusobacterium;s__Fusobacterium periodonticum	NA	2064311	28.1	2072	322	NA	21_52	1	0
556	HMP_2012__SRS053603__bin.6	Pasolli et al., 2019	non-CRC	USA	92.7	1.12	d__Bacteria;p__Fusobacteriota;c__Fusobacteriia;o__Fusobacteriales;f__Fusobacteriaceae;g__Fusobacterium;s__Fusobacterium periodonticum	NA	1953003	27.9	2029	416	NA	21_23	1	1
557	HMP_2012__SRS053854__bin.9	Pasolli et al., 2019	non-CRC	USA	94.38	0.56	d__Bacteria;p__Fusobacteriota;c__Fusobacteriia;o__Fusobacteriales;f__Fusobacteriaceae;g__Fusobacterium;s__Fusobacterium periodonticum	NA	2671226	27.5	2722	253	NA	21_14	1	0
558	HMP_2012__SRS057355__bin.21	Pasolli et al., 2019	non-CRC	USA	97.19	0	d__Bacteria;p__Fusobacteriota;c__Fusobacteriia;o__Fusobacteriales;f__Fusobacteriaceae;g__Fusobacterium;s__Fusobacterium periodonticum	NA	2040055	28.1	2077	277	NA	21_57	1	0
559	HMP_2012__SRS062761__bin.9	Pasolli et al., 2019	non-CRC	USA	93.26	1.24	d__Bacteria;p__Fusobacteriota;c__Fusobacteriia;o__Fusobacteriales;f__Fusobacteriaceae;g__Fusobacterium;s__Fusobacterium periodonticum	NA	1966278	28.3	2123	490	NA	21_56	0	0
560	HMP_2012__SRS062878__bin.31	Pasolli et al., 2019	non-CRC	USA	100	3.37	d__Bacteria;p__Fusobacteriota;c__Fusobacteriia;o__Fusobacteriales;f__Fusobacteriaceae;g__Fusobacterium;s__Fusobacterium periodonticum	NA	2200635	27.8	2229	279	NA	21_42	1	0
561	HMP_2012__SRS063193__bin.25	Pasolli et al., 2019	non-CRC	USA	91.57	0	d__Bacteria;p__Fusobacteriota;c__Fusobacteriia;o__Fusobacteriales;f__Fusobacteriaceae;g__Fusobacterium;s__Fusobacterium periodonticum	NA	1796441	28.4	1741	256	NA	21_28	1	0
562	HMP_2012__SRS065335__bin.4	Pasolli et al., 2019	non-CRC	USA	98.88	0.56	d__Bacteria;p__Fusobacteriota;c__Fusobacteriia;o__Fusobacteriales;f__Fusobacteriaceae;g__Fusobacterium;s__Fusobacterium periodonticum	NA	2375938	27.7	2355	270	NA	21_15	1	1
563	HMP_2012__SRS018149__bin.25	Pasolli et al., 2019	non-CRC	USA	92.13	1.12	d__Bacteria;p__Fusobacteriota;c__Fusobacteriia;o__Fusobacteriales;f__Fusobacteriaceae;g__Fusobacterium;s__Fusobacterium periodonticum_C	NA	2124845	28.1	2353	492	NA	21_24	1	0
564	HMP_2012__SRS022719__bin.44	Pasolli et al., 2019	non-CRC	USA	95.51	1.12	d__Bacteria;p__Fusobacteriota;c__Fusobacteriia;o__Fusobacteriales;f__Fusobacteriaceae;g__Fusobacterium;s__Fusobacterium periodonticum_C	NA	2089027	28.2	2057	156	NA	21_4	1	0
565	HMP_2012__SRS044662__bin.14	Pasolli et al., 2019	non-CRC	USA	100	0.56	d__Bacteria;p__Fusobacteriota;c__Fusobacteriia;o__Fusobacteriales;f__Fusobacteriaceae;g__Fusobacterium;s__Fusobacterium periodonticum_C	NA	2126517	28	2073	122	NA	21_4	1	0
566	HMP_2012__SRS045127__bin.1	Pasolli et al., 2019	non-CRC	USA	92.13	4.49	d__Bacteria;p__Fusobacteriota;c__Fusobacteriia;o__Fusobacteriales;f__Fusobacteriaceae;g__Fusobacterium;s__Fusobacterium periodonticum_C	NA	1857484	28.1	1960	401	NA	21_46	1	0
567	QinN_2014__LD-44__bin.19	Pasolli et al., 2019	non-CRC	China	94.38	0	d__Bacteria;p__Fusobacteriota;c__Fusobacteriia;o__Fusobacteriales;f__Fusobacteriaceae;g__Fusobacterium;s__Fusobacterium periodonticum_C	NA	2300518	28.3	2349	459	NA	21_12	1	1
568	HMP_2012__SRS016541__bin.1	Pasolli et al., 2019	non-CRC	USA	93.26	3.37	d__Bacteria;p__Fusobacteriota;c__Fusobacteriia;o__Fusobacteriales;f__Fusobacteriaceae;g__Fusobacterium;s__Fusobacterium polymorphum	NA	2042373	27.4	2206	531	NA	23_67	0	0
569	CM_periimplantitis__SP_189SPI_T016__bin.8	Pasolli et al., 2019	non-CRC	Italy	92.7	2.13	d__Bacteria;p__Fusobacteriota;c__Fusobacteriia;o__Fusobacteriales;f__Fusobacteriaceae;g__Fusobacterium;s__GCF_000524395.1	NA	1800725	27.7	2027	499	NA	23_49	1	0
570	HMP_2012__SRS050628__bin.23	Pasolli et al., 2019	non-CRC	USA	97.75	2.92	d__Bacteria;p__Fusobacteriota;c__Fusobacteriia;o__Fusobacteriales;f__Fusobacteriaceae;g__Fusobacterium;s__GCF_000524395.1	NA	2398172	27	2615	465	NA	23_57	1	0
571	HMP_2012__SRS075410__bin.36	Pasolli et al., 2019	non-CRC	USA	92.7	0	d__Bacteria;p__Fusobacteriota;c__Fusobacteriia;o__Fusobacteriales;f__Fusobacteriaceae;g__Fusobacterium;s__GCF_000524395.1	NA	2461680	26.7	2588	337	NA	23_59	0	0
572	CM_periimplantitis__SP_125SPI_T016__bin.3	Pasolli et al., 2019	non-CRC	Italy	91.2	0	d__Bacteria;p__Fusobacteriota;c__Fusobacteriia;o__Fusobacteriales;f__Fusobacteriaceae;g__Fusobacterium;s__GCF_002243405.1	NA	1819774	27.6	1866	352	NA	23_37	0	1
573	BackhedF_2015__SID385_12M__bin.43	Pasolli et al., 2019	non-CRC	Sweden	98.88	2.41	d__Bacteria;p__Fusobacteriota;c__Fusobacteriia;o__Fusobacteriales;f__Fusobacteriaceae;g__Fusobacterium_A;s__	NA	2312849	29.8	2288	177	NA	13_18	0	0
574	HeQ_2017__RSZAXPI003069-101__bin.8	Pasolli et al., 2019	non-CRC	China	100	2.25	d__Bacteria;p__Fusobacteriota;c__Fusobacteriia;o__Fusobacteriales;f__Fusobacteriaceae;g__Fusobacterium_A;s__	NA	3243884	28.9	2928	69	NA	12_2	2	0
575	HeQ_2017__RSZAXPI003106-145__bin.34	Pasolli et al., 2019	non-CRC	China	97.85	2.25	d__Bacteria;p__Fusobacteriota;c__Fusobacteriia;o__Fusobacteriales;f__Fusobacteriaceae;g__Fusobacterium_A;s__	NA	3024784	29.1	2883	196	NA	12_2	1	0
576	HeQ_2017__SZAXPI029463-136__bin.16	Pasolli et al., 2019	non-CRC	China	100	2.25	d__Bacteria;p__Fusobacteriota;c__Fusobacteriia;o__Fusobacteriales;f__Fusobacteriaceae;g__Fusobacterium_A;s__	NA	3168424	29.2	2986	176	NA	12_2	1	0
577	HeQ_2017__SZAXPI029474-42__bin.18	Pasolli et al., 2019	non-CRC	China	100	2.25	d__Bacteria;p__Fusobacteriota;c__Fusobacteriia;o__Fusobacteriales;f__Fusobacteriaceae;g__Fusobacterium_A;s__	NA	3237688	29	3000	62	NA	12_2	1	0
578	HeQ_2017__SZAXPI029497-98__bin.16	Pasolli et al., 2019	non-CRC	China	100	1.12	d__Bacteria;p__Fusobacteriota;c__Fusobacteriia;o__Fusobacteriales;f__Fusobacteriaceae;g__Fusobacterium_A;s__	NA	3195905	28.9	3176	205	NA	12_2	2	0
579	HeQ_2017__SZAXPI029550-158__bin.15	Pasolli et al., 2019	non-CRC	China	100	2.25	d__Bacteria;p__Fusobacteriota;c__Fusobacteriia;o__Fusobacteriales;f__Fusobacteriaceae;g__Fusobacterium_A;s__	NA	3247204	29	3018	53	NA	12_2	2	0
580	LiJ_2017__H3M516804__bin.49	Pasolli et al., 2019	non-CRC	China	96.63	4.49	d__Bacteria;p__Fusobacteriota;c__Fusobacteriia;o__Fusobacteriales;f__Fusobacteriaceae;g__Fusobacterium_A;s__	NA	2009475	30.1	2069	479	NA	13_10	0	0
581	LoombaR_2017__SID5571_lgi__bin.33	Pasolli et al., 2019	non-CRC	USA	98.88	1.12	d__Bacteria;p__Fusobacteriota;c__Fusobacteriia;o__Fusobacteriales;f__Fusobacteriaceae;g__Fusobacterium_A;s__	NA	2400165	29.5	2343	270	NA	13_17	0	0
582	LoombaR_2017__SID5636_prt__bin.5	Pasolli et al., 2019	non-CRC	USA	97.75	3.37	d__Bacteria;p__Fusobacteriota;c__Fusobacteriia;o__Fusobacteriales;f__Fusobacteriaceae;g__Fusobacterium_A;s__	NA	2446545	29.7	2464	299	NA	13_14	0	0
583	QinJ_2012__CON-007__bin.24	Pasolli et al., 2019	non-CRC	China	98.8	1.12	d__Bacteria;p__Fusobacteriota;c__Fusobacteriia;o__Fusobacteriales;f__Fusobacteriaceae;g__Fusobacterium_A;s__	NA	3114754	29.1	2937	178	NA	12_2	2	0
584	QinJ_2012__NLM027__bin.27	Pasolli et al., 2019	non-CRC	China	98.88	3.37	d__Bacteria;p__Fusobacteriota;c__Fusobacteriia;o__Fusobacteriales;f__Fusobacteriaceae;g__Fusobacterium_A;s__	NA	2233087	29.4	2227	328	NA	13_7	0	0
585	QinJ_2012__NOF009__bin.1	Pasolli et al., 2019	non-CRC	China	100	2.25	d__Bacteria;p__Fusobacteriota;c__Fusobacteriia;o__Fusobacteriales;f__Fusobacteriaceae;g__Fusobacterium_A;s__	NA	3186809	29.1	3096	248	NA	12_2	0	0
586	QinJ_2012__NOM004__bin.19	Pasolli et al., 2019	non-CRC	China	98.88	2.25	d__Bacteria;p__Fusobacteriota;c__Fusobacteriia;o__Fusobacteriales;f__Fusobacteriaceae;g__Fusobacterium_A;s__	NA	3729499	30.5	3981	594	NA	11_1	2	0
587	QinJ_2012__T2D-003__bin.1	Pasolli et al., 2019	non-CRC	China	98.88	1.12	d__Bacteria;p__Fusobacteriota;c__Fusobacteriia;o__Fusobacteriales;f__Fusobacteriaceae;g__Fusobacterium_A;s__	NA	3195073	29.3	3074	359	NA	12_2	2	0
588	QinJ_2012__T2D-022__bin.21	Pasolli et al., 2019	non-CRC	China	96.63	2.25	d__Bacteria;p__Fusobacteriota;c__Fusobacteriia;o__Fusobacteriales;f__Fusobacteriaceae;g__Fusobacterium_A;s__	NA	2841361	29.1	2939	419	NA	12_2	2	0
589	QinJ_2012__T2D-045__bin.2	Pasolli et al., 2019	non-CRC	China	94.38	3.37	d__Bacteria;p__Fusobacteriota;c__Fusobacteriia;o__Fusobacteriales;f__Fusobacteriaceae;g__Fusobacterium_A;s__	NA	2513453	30	2628	622	NA	12_2	0	0
590	QinJ_2012__T2D-054__bin.13	Pasolli et al., 2019	non-CRC	China	100	1.12	d__Bacteria;p__Fusobacteriota;c__Fusobacteriia;o__Fusobacteriales;f__Fusobacteriaceae;g__Fusobacterium_A;s__	NA	3296710	29.1	3065	151	NA	12_2	2	0
591	QinJ_2012__T2D-059__bin.19	Pasolli et al., 2019	non-CRC	China	97.75	3.37	d__Bacteria;p__Fusobacteriota;c__Fusobacteriia;o__Fusobacteriales;f__Fusobacteriaceae;g__Fusobacterium_A;s__	NA	2356660	29.5	2334	319	NA	13_4	0	0
592	QinJ_2012__T2D-074__bin.35	Pasolli et al., 2019	non-CRC	China	100	2.25	d__Bacteria;p__Fusobacteriota;c__Fusobacteriia;o__Fusobacteriales;f__Fusobacteriaceae;g__Fusobacterium_A;s__	NA	2967474	29.3	2785	140	NA	12_2	1	0
593	QinJ_2012__T2D-083__bin.23	Pasolli et al., 2019	non-CRC	China	91.01	1.12	d__Bacteria;p__Fusobacteriota;c__Fusobacteriia;o__Fusobacteriales;f__Fusobacteriaceae;g__Fusobacterium_A;s__	NA	2654864	29.5	2732	479	NA	12_2	2	0
594	QinJ_2012__T2D-107__bin.31	Pasolli et al., 2019	non-CRC	China	98.88	3.37	d__Bacteria;p__Fusobacteriota;c__Fusobacteriia;o__Fusobacteriales;f__Fusobacteriaceae;g__Fusobacterium_A;s__	NA	2331645	29.6	2189	136	NA	13_1	0	0
595	QinN_2014__LD-88__bin.28	Pasolli et al., 2019	non-CRC	China	100	1.12	d__Bacteria;p__Fusobacteriota;c__Fusobacteriia;o__Fusobacteriales;f__Fusobacteriaceae;g__Fusobacterium_A;s__	NA	3170901	29	3000	82	NA	12_2	1	0
596	QinN_2014__LV-17__bin.7	Pasolli et al., 2019	non-CRC	China	97.75	3.37	d__Bacteria;p__Fusobacteriota;c__Fusobacteriia;o__Fusobacteriales;f__Fusobacteriaceae;g__Fusobacterium_A;s__	NA	2381613	29.5	2306	122	NA	13_9	0	0
597	VogtmannE_2016__MMRS72802364ST-27-0-0__bin.41	Pasolli et al., 2019	non-CRC	USA	96.63	2.25	d__Bacteria;p__Fusobacteriota;c__Fusobacteriia;o__Fusobacteriales;f__Fusobacteriaceae;g__Fusobacterium_A;s__	NA	2343555	29.8	2412	507	NA	13_19	0	0
598	WenC_2017__RA074__bin.38	Pasolli et al., 2019	non-CRC	China	98.31	2.47	d__Bacteria;p__Fusobacteriota;c__Fusobacteriia;o__Fusobacteriales;f__Fusobacteriaceae;g__Fusobacterium_A;s__	NA	2190589	29.1	2155	226	NA	13_23	0	0
599	YuJ_2015__SZAXPI015237-23__bin.9	Pasolli et al., 2019	non-CRC	China	100	2.25	d__Bacteria;p__Fusobacteriota;c__Fusobacteriia;o__Fusobacteriales;f__Fusobacteriaceae;g__Fusobacterium_A;s__	NA	3292494	28.9	3073	69	NA	12_2	1	0
600	HeQ_2017__RSZAXPI003065-105__bin.21	Pasolli et al., 2019	non-CRC	China	97.75	2.7	d__Bacteria;p__Fusobacteriota;c__Fusobacteriia;o__Fusobacteriales;f__Fusobacteriaceae;g__Fusobacterium_A;s__Fusobacterium_A mortiferum	NA	2600810	29	2487	124	NA	18_1	0	0
601	HeQ_2017__RSZAXPI003082-116__bin.25	Pasolli et al., 2019	non-CRC	China	92.13	1.12	d__Bacteria;p__Fusobacteriota;c__Fusobacteriia;o__Fusobacteriales;f__Fusobacteriaceae;g__Fusobacterium_A;s__Fusobacterium_A mortiferum	NA	2249335	29.2	2142	42	NA	18_1	0	0
602	HeQ_2017__RSZAXPI003101-139__bin.10	Pasolli et al., 2019	non-CRC	China	96.97	1.69	d__Bacteria;p__Fusobacteriota;c__Fusobacteriia;o__Fusobacteriales;f__Fusobacteriaceae;g__Fusobacterium_A;s__Fusobacterium_A mortiferum	NA	2521020	29.2	2453	160	NA	18_1	0	0
603	HeQ_2017__SZAXPI029469-27__bin.14	Pasolli et al., 2019	non-CRC	China	96.63	1.69	d__Bacteria;p__Fusobacteriota;c__Fusobacteriia;o__Fusobacteriales;f__Fusobacteriaceae;g__Fusobacterium_A;s__Fusobacterium_A mortiferum	NA	2485529	29.3	2611	424	NA	18_1	0	0
604	HeQ_2017__SZAXPI029471-33__bin.3	Pasolli et al., 2019	non-CRC	China	96.63	1.12	d__Bacteria;p__Fusobacteriota;c__Fusobacteriia;o__Fusobacteriales;f__Fusobacteriaceae;g__Fusobacterium_A;s__Fusobacterium_A mortiferum	NA	2677998	29	2580	40	NA	18_1	0	0
605	HeQ_2017__SZAXPI029484-80__bin.24	Pasolli et al., 2019	non-CRC	China	97.64	1.12	d__Bacteria;p__Fusobacteriota;c__Fusobacteriia;o__Fusobacteriales;f__Fusobacteriaceae;g__Fusobacterium_A;s__Fusobacterium_A mortiferum	NA	2826394	28.8	2726	76	NA	18_1	0	0
606	HeQ_2017__SZAXPI029499-101__bin.60	Pasolli et al., 2019	non-CRC	China	93.26	1.12	d__Bacteria;p__Fusobacteriota;c__Fusobacteriia;o__Fusobacteriales;f__Fusobacteriaceae;g__Fusobacterium_A;s__Fusobacterium_A mortiferum	NA	2404305	29	2565	351	NA	18_1	0	0
607	HeQ_2017__SZAXPI029577-94__bin.20	Pasolli et al., 2019	non-CRC	China	98.88	1.12	d__Bacteria;p__Fusobacteriota;c__Fusobacteriia;o__Fusobacteriales;f__Fusobacteriaceae;g__Fusobacterium_A;s__Fusobacterium_A mortiferum	NA	2669968	29	2642	212	NA	18_1	0	0
608	HeQ_2017__SZAXPI029580-98__bin.31	Pasolli et al., 2019	non-CRC	China	98.88	1.12	d__Bacteria;p__Fusobacteriota;c__Fusobacteriia;o__Fusobacteriales;f__Fusobacteriaceae;g__Fusobacterium_A;s__Fusobacterium_A mortiferum	NA	2629960	29	2568	129	NA	18_1	0	0
609	HeQ_2017__SZAXPI029598-166__bin.63	Pasolli et al., 2019	non-CRC	China	97.75	1.24	d__Bacteria;p__Fusobacteriota;c__Fusobacteriia;o__Fusobacteriales;f__Fusobacteriaceae;g__Fusobacterium_A;s__Fusobacterium_A mortiferum	NA	2408187	29.4	2383	262	NA	18_1	0	0
610	HeQ_2017__SZAXPI029601-32__bin.27	Pasolli et al., 2019	non-CRC	China	92.13	2.25	d__Bacteria;p__Fusobacteriota;c__Fusobacteriia;o__Fusobacteriales;f__Fusobacteriaceae;g__Fusobacterium_A;s__Fusobacterium_A mortiferum	NA	2540552	29	2507	176	NA	18_1	0	0
611	LiJ_2017__H1M413822__bin.30	Pasolli et al., 2019	non-CRC	China	96.63	1.12	d__Bacteria;p__Fusobacteriota;c__Fusobacteriia;o__Fusobacteriales;f__Fusobacteriaceae;g__Fusobacterium_A;s__Fusobacterium_A mortiferum	NA	2572268	29.1	2555	295	NA	18_1	0	0
612	LiJ_2017__H1M512831__bin.36	Pasolli et al., 2019	non-CRC	China	94.94	1.12	d__Bacteria;p__Fusobacteriota;c__Fusobacteriia;o__Fusobacteriales;f__Fusobacteriaceae;g__Fusobacterium_A;s__Fusobacterium_A mortiferum	NA	2134791	30	2232	448	NA	18_1	0	0
613	LiJ_2017__H3M515920__bin.3	Pasolli et al., 2019	non-CRC	China	97.75	1.12	d__Bacteria;p__Fusobacteriota;c__Fusobacteriia;o__Fusobacteriales;f__Fusobacteriaceae;g__Fusobacterium_A;s__Fusobacterium_A mortiferum	NA	2621456	29.1	2608	188	NA	18_1	0	0
614	LiJ_2017__H3M515950__bin.14	Pasolli et al., 2019	non-CRC	China	96.63	1.12	d__Bacteria;p__Fusobacteriota;c__Fusobacteriia;o__Fusobacteriales;f__Fusobacteriaceae;g__Fusobacterium_A;s__Fusobacterium_A mortiferum	NA	2467801	29.1	2436	289	NA	18_1	0	0
615	QinJ_2012__CON-039__bin.34	Pasolli et al., 2019	non-CRC	China	95.51	2.25	d__Bacteria;p__Fusobacteriota;c__Fusobacteriia;o__Fusobacteriales;f__Fusobacteriaceae;g__Fusobacterium_A;s__Fusobacterium_A mortiferum	NA	2489130	29.2	2502	320	NA	18_1	0	0
616	QinJ_2012__CON-095__bin.12	Pasolli et al., 2019	non-CRC	China	97.75	1.12	d__Bacteria;p__Fusobacteriota;c__Fusobacteriia;o__Fusobacteriales;f__Fusobacteriaceae;g__Fusobacterium_A;s__Fusobacterium_A mortiferum	NA	2551821	28.9	2643	315	NA	18_1	0	0
617	QinJ_2012__DLF004__bin.10	Pasolli et al., 2019	non-CRC	China	97.75	1.12	d__Bacteria;p__Fusobacteriota;c__Fusobacteriia;o__Fusobacteriales;f__Fusobacteriaceae;g__Fusobacterium_A;s__Fusobacterium_A mortiferum	NA	2491010	29	2473	197	NA	18_1	0	0
618	QinJ_2012__DLM010__bin.25	Pasolli et al., 2019	non-CRC	China	93.26	1.12	d__Bacteria;p__Fusobacteriota;c__Fusobacteriia;o__Fusobacteriales;f__Fusobacteriaceae;g__Fusobacterium_A;s__Fusobacterium_A mortiferum	NA	2478399	29.1	2385	173	NA	18_1	0	0
619	QinJ_2012__DLM014__bin.20	Pasolli et al., 2019	non-CRC	China	92.13	1.12	d__Bacteria;p__Fusobacteriota;c__Fusobacteriia;o__Fusobacteriales;f__Fusobacteriaceae;g__Fusobacterium_A;s__Fusobacterium_A mortiferum	NA	1903772	29.3	1818	91	NA	18_1	0	0
620	QinJ_2012__NLM006__bin.12	Pasolli et al., 2019	non-CRC	China	96.63	2.81	d__Bacteria;p__Fusobacteriota;c__Fusobacteriia;o__Fusobacteriales;f__Fusobacteriaceae;g__Fusobacterium_A;s__Fusobacterium_A mortiferum	NA	2498912	29	2508	206	NA	18_1	0	0
621	QinJ_2012__NLM024__bin.11	Pasolli et al., 2019	non-CRC	China	91.01	1.12	d__Bacteria;p__Fusobacteriota;c__Fusobacteriia;o__Fusobacteriales;f__Fusobacteriaceae;g__Fusobacterium_A;s__Fusobacterium_A mortiferum	NA	2573107	28.9	2584	173	NA	18_1	0	0
622	QinJ_2012__T2D-007__bin.7	Pasolli et al., 2019	non-CRC	China	93.26	3.09	d__Bacteria;p__Fusobacteriota;c__Fusobacteriia;o__Fusobacteriales;f__Fusobacteriaceae;g__Fusobacterium_A;s__Fusobacterium_A mortiferum	NA	1917103	29.6	2123	466	NA	18_1	0	0
623	QinJ_2012__T2D-023__bin.59	Pasolli et al., 2019	non-CRC	China	95.51	0	d__Bacteria;p__Fusobacteriota;c__Fusobacteriia;o__Fusobacteriales;f__Fusobacteriaceae;g__Fusobacterium_A;s__Fusobacterium_A mortiferum	NA	2346942	29.4	2403	366	NA	18_1	0	0
624	QinJ_2012__T2D-037__bin.18	Pasolli et al., 2019	non-CRC	China	97.75	1.12	d__Bacteria;p__Fusobacteriota;c__Fusobacteriia;o__Fusobacteriales;f__Fusobacteriaceae;g__Fusobacterium_A;s__Fusobacterium_A mortiferum	NA	2560650	29.2	2468	255	NA	18_1	0	0
625	QinN_2014__HD-19__bin.28	Pasolli et al., 2019	non-CRC	China	94.38	1.12	d__Bacteria;p__Fusobacteriota;c__Fusobacteriia;o__Fusobacteriales;f__Fusobacteriaceae;g__Fusobacterium_A;s__Fusobacterium_A mortiferum	NA	2355453	29.2	2205	32	NA	18_1	0	0
626	QinN_2014__HD-24__bin.23	Pasolli et al., 2019	non-CRC	China	98.88	1.12	d__Bacteria;p__Fusobacteriota;c__Fusobacteriia;o__Fusobacteriales;f__Fusobacteriaceae;g__Fusobacterium_A;s__Fusobacterium_A mortiferum	NA	2563884	29.1	2544	191	NA	18_1	0	0
627	QinN_2014__HD-29__bin.4	Pasolli et al., 2019	non-CRC	China	96.63	1.69	d__Bacteria;p__Fusobacteriota;c__Fusobacteriia;o__Fusobacteriales;f__Fusobacteriaceae;g__Fusobacterium_A;s__Fusobacterium_A mortiferum	NA	2254676	29.6	2296	318	NA	18_1	0	0
628	QinN_2014__HD-69__bin.19	Pasolli et al., 2019	non-CRC	China	92.13	1.12	d__Bacteria;p__Fusobacteriota;c__Fusobacteriia;o__Fusobacteriales;f__Fusobacteriaceae;g__Fusobacterium_A;s__Fusobacterium_A mortiferum	NA	2222453	29.6	2243	432	NA	18_1	0	0
629	QinN_2014__HD-75__bin.20	Pasolli et al., 2019	non-CRC	China	97.75	1.12	d__Bacteria;p__Fusobacteriota;c__Fusobacteriia;o__Fusobacteriales;f__Fusobacteriaceae;g__Fusobacterium_A;s__Fusobacterium_A mortiferum	NA	2569680	29.1	2513	135	NA	18_1	0	0
630	QinN_2014__LD-18__bin.5	Pasolli et al., 2019	non-CRC	China	98.88	1.12	d__Bacteria;p__Fusobacteriota;c__Fusobacteriia;o__Fusobacteriales;f__Fusobacteriaceae;g__Fusobacterium_A;s__Fusobacterium_A mortiferum	NA	2630833	29	2557	123	NA	18_1	0	0
631	QinN_2014__LD-26__bin.4	Pasolli et al., 2019	non-CRC	China	92.13	1.12	d__Bacteria;p__Fusobacteriota;c__Fusobacteriia;o__Fusobacteriales;f__Fusobacteriaceae;g__Fusobacterium_A;s__Fusobacterium_A mortiferum	NA	2473952	29.1	2370	150	NA	18_1	0	0
632	QinN_2014__LD-28__bin.9	Pasolli et al., 2019	non-CRC	China	91.01	1.12	d__Bacteria;p__Fusobacteriota;c__Fusobacteriia;o__Fusobacteriales;f__Fusobacteriaceae;g__Fusobacterium_A;s__Fusobacterium_A mortiferum	NA	1817570	29.5	1719	109	NA	18_1	0	0
633	QinN_2014__LD-74__bin.59	Pasolli et al., 2019	non-CRC	China	97.75	1.12	d__Bacteria;p__Fusobacteriota;c__Fusobacteriia;o__Fusobacteriales;f__Fusobacteriaceae;g__Fusobacterium_A;s__Fusobacterium_A mortiferum	NA	2108877	29.7	2232	449	NA	18_1	0	0
634	QinN_2014__LD-75__bin.51	Pasolli et al., 2019	non-CRC	China	98.88	1.12	d__Bacteria;p__Fusobacteriota;c__Fusobacteriia;o__Fusobacteriales;f__Fusobacteriaceae;g__Fusobacterium_A;s__Fusobacterium_A mortiferum	NA	2497298	29.2	2384	21	NA	18_4	0	0
635	QinN_2014__LD-76__bin.3	Pasolli et al., 2019	non-CRC	China	92.13	1.12	d__Bacteria;p__Fusobacteriota;c__Fusobacteriia;o__Fusobacteriales;f__Fusobacteriaceae;g__Fusobacterium_A;s__Fusobacterium_A mortiferum	NA	2430631	29.2	2465	293	NA	18_1	0	0
636	QinN_2014__LD-84__bin.22	Pasolli et al., 2019	non-CRC	China	93.82	1.12	d__Bacteria;p__Fusobacteriota;c__Fusobacteriia;o__Fusobacteriales;f__Fusobacteriaceae;g__Fusobacterium_A;s__Fusobacterium_A mortiferum	NA	2623229	28.8	2580	176	NA	18_1	0	0
637	QinN_2014__LV-13__bin.14	Pasolli et al., 2019	non-CRC	China	98.88	1.12	d__Bacteria;p__Fusobacteriota;c__Fusobacteriia;o__Fusobacteriales;f__Fusobacteriaceae;g__Fusobacterium_A;s__Fusobacterium_A mortiferum	NA	2570414	29.1	2558	181	NA	18_1	0	0
638	QinN_2014__LV-18__bin.4	Pasolli et al., 2019	non-CRC	China	94.38	1.12	d__Bacteria;p__Fusobacteriota;c__Fusobacteriia;o__Fusobacteriales;f__Fusobacteriaceae;g__Fusobacterium_A;s__Fusobacterium_A mortiferum	NA	2576319	28.9	2442	82	NA	18_1	0	0
639	QinN_2014__LV-20__bin.16	Pasolli et al., 2019	non-CRC	China	94.38	0	d__Bacteria;p__Fusobacteriota;c__Fusobacteriia;o__Fusobacteriales;f__Fusobacteriaceae;g__Fusobacterium_A;s__Fusobacterium_A mortiferum	NA	2186707	29.6	2375	443	NA	18_1	0	0
640	QinN_2014__LV-6__bin.13	Pasolli et al., 2019	non-CRC	China	91.3	1.12	d__Bacteria;p__Fusobacteriota;c__Fusobacteriia;o__Fusobacteriales;f__Fusobacteriaceae;g__Fusobacterium_A;s__Fusobacterium_A mortiferum	NA	2181179	29.1	2036	49	NA	18_1	0	0
641	VogtmannE_2016__MMRS56137463ST-27-0-0__bin.41	Pasolli et al., 2019	non-CRC	USA	98.88	1.12	d__Bacteria;p__Fusobacteriota;c__Fusobacteriia;o__Fusobacteriales;f__Fusobacteriaceae;g__Fusobacterium_A;s__Fusobacterium_A mortiferum	NA	2475532	29.2	2443	258	NA	18_1	0	0
642	WenC_2017__RA084__bin.4	Pasolli et al., 2019	non-CRC	China	95.13	4.04	d__Bacteria;p__Fusobacteriota;c__Fusobacteriia;o__Fusobacteriales;f__Fusobacteriaceae;g__Fusobacterium_A;s__Fusobacterium_A mortiferum	NA	2334024	29.6	2473	458	NA	18_7	0	0
643	WenC_2017__RA106__bin.26	Pasolli et al., 2019	non-CRC	China	94.38	0	d__Bacteria;p__Fusobacteriota;c__Fusobacteriia;o__Fusobacteriales;f__Fusobacteriaceae;g__Fusobacterium_A;s__Fusobacterium_A mortiferum	NA	1921002	30.1	2085	434	NA	18_1	0	0
644	YuJ_2015__SZAXPI003422-11__bin.77	Pasolli et al., 2019	non-CRC	China	98.88	1.12	d__Bacteria;p__Fusobacteriota;c__Fusobacteriia;o__Fusobacteriales;f__Fusobacteriaceae;g__Fusobacterium_A;s__Fusobacterium_A mortiferum	NA	2774043	28.9	2767	149	NA	18_1	0	0
645	YuJ_2015__SZAXPI015222-123__bin.11	Pasolli et al., 2019	non-CRC	China	98.88	1.12	d__Bacteria;p__Fusobacteriota;c__Fusobacteriia;o__Fusobacteriales;f__Fusobacteriaceae;g__Fusobacterium_A;s__Fusobacterium_A mortiferum	NA	2605427	28.9	2456	64	NA	18_1	0	0
646	YuJ_2015__SZAXPI017595-169__bin.22	Pasolli et al., 2019	non-CRC	China	90.45	1.12	d__Bacteria;p__Fusobacteriota;c__Fusobacteriia;o__Fusobacteriales;f__Fusobacteriaceae;g__Fusobacterium_A;s__Fusobacterium_A mortiferum	NA	2277722	29.5	2290	434	NA	18_1	0	0
647	ZeeviD_2015__PNP_Main_130__bin.25	Pasolli et al., 2019	non-CRC	Israel	91.64	1.69	d__Bacteria;p__Fusobacteriota;c__Fusobacteriia;o__Fusobacteriales;f__Fusobacteriaceae;g__Fusobacterium_A;s__Fusobacterium_A mortiferum	NA	2407947	28.9	2509	345	NA	18_1	0	0
648	CosteaPI_2017__donald4-11-7-0__bin.5	Pasolli et al., 2019	non-CRC	Germany	100	2.25	d__Bacteria;p__Fusobacteriota;c__Fusobacteriia;o__Fusobacteriales;f__Fusobacteriaceae;g__Fusobacterium_A;s__Fusobacterium_A ulcerans	NA	3487867	30.3	3259	56	NA	11_6	3	0
649	HeQ_2017__SZAXPI029473-40__bin.22	Pasolli et al., 2019	non-CRC	China	100	2.25	d__Bacteria;p__Fusobacteriota;c__Fusobacteriia;o__Fusobacteriales;f__Fusobacteriaceae;g__Fusobacterium_A;s__Fusobacterium_A ulcerans	NA	3458762	30.2	3334	95	NA	11_8	3	0
650	HeQ_2017__SZAXPI029495-96__bin.3	Pasolli et al., 2019	non-CRC	China	100	4.49	d__Bacteria;p__Fusobacteriota;c__Fusobacteriia;o__Fusobacteriales;f__Fusobacteriaceae;g__Fusobacterium_A;s__Fusobacterium_A ulcerans	NA	3471268	30.3	3464	239	NA	11_7	4	0
651	HeQ_2017__SZAXPI029541-107__bin.12	Pasolli et al., 2019	non-CRC	China	100	3.93	d__Bacteria;p__Fusobacteriota;c__Fusobacteriia;o__Fusobacteriales;f__Fusobacteriaceae;g__Fusobacterium_A;s__Fusobacterium_A ulcerans	NA	3253743	30.5	3202	338	NA	11_6	3	0
652	HeQ_2017__SZAXPI029574-89__bin.17	Pasolli et al., 2019	non-CRC	China	98.88	3.53	d__Bacteria;p__Fusobacteriota;c__Fusobacteriia;o__Fusobacteriales;f__Fusobacteriaceae;g__Fusobacterium_A;s__Fusobacterium_A ulcerans	NA	3329492	30.4	3305	306	NA	11_7	4	0
653	LiJ_2014__O2.UC26-1__bin.16	Pasolli et al., 2019	non-CRC	China	100	2.25	d__Bacteria;p__Fusobacteriota;c__Fusobacteriia;o__Fusobacteriales;f__Fusobacteriaceae;g__Fusobacterium_A;s__Fusobacterium_A ulcerans	NA	3371903	30.4	3188	109	NA	11_7	4	0
654	LiJ_2014__V1.FI18__bin.6	Pasolli et al., 2019	non-CRC	China	100	2.25	d__Bacteria;p__Fusobacteriota;c__Fusobacteriia;o__Fusobacteriales;f__Fusobacteriaceae;g__Fusobacterium_A;s__Fusobacterium_A ulcerans	NA	3342198	30.6	3227	123	NA	11_8	4	0
655	LiJ_2017__H3M518116__bin.17	Pasolli et al., 2019	non-CRC	China	100	2.25	d__Bacteria;p__Fusobacteriota;c__Fusobacteriia;o__Fusobacteriales;f__Fusobacteriaceae;g__Fusobacterium_A;s__Fusobacterium_A ulcerans	NA	3551367	30.4	3440	270	NA	11_10	4	0
656	NielsenHB_2014__O2_UC26_0__bin.16	Pasolli et al., 2019	non-CRC	Denmark	100	2.25	d__Bacteria;p__Fusobacteriota;c__Fusobacteriia;o__Fusobacteriales;f__Fusobacteriaceae;g__Fusobacterium_A;s__Fusobacterium_A ulcerans	NA	3241754	30.4	3076	110	NA	11_7	4	0
657	QinJ_2012__DLF008__bin.8	Pasolli et al., 2019	non-CRC	China	100	2.25	d__Bacteria;p__Fusobacteriota;c__Fusobacteriia;o__Fusobacteriales;f__Fusobacteriaceae;g__Fusobacterium_A;s__Fusobacterium_A ulcerans	NA	3604940	30.3	3429	68	NA	11_6	3	0
658	QinJ_2012__DOF006__bin.1	Pasolli et al., 2019	non-CRC	China	100	2.25	d__Bacteria;p__Fusobacteriota;c__Fusobacteriia;o__Fusobacteriales;f__Fusobacteriaceae;g__Fusobacterium_A;s__Fusobacterium_A ulcerans	NA	3380757	30.4	3277	198	NA	11_8	4	0
659	QinN_2014__HD-10__bin.29	Pasolli et al., 2019	non-CRC	China	92.88	4.49	d__Bacteria;p__Fusobacteriota;c__Fusobacteriia;o__Fusobacteriales;f__Fusobacteriaceae;g__Fusobacterium_A;s__Fusobacterium_A ulcerans	NA	2895291	30.6	3135	547	NA	11_6	1	0
660	QinN_2014__LD-51__bin.51	Pasolli et al., 2019	non-CRC	China	91.01	3.37	d__Bacteria;p__Fusobacteriota;c__Fusobacteriia;o__Fusobacteriales;f__Fusobacteriaceae;g__Fusobacterium_A;s__Fusobacterium_A ulcerans	NA	3166228	30.4	3245	372	NA	11_8	3	0
661	QinN_2014__LD-89__bin.13	Pasolli et al., 2019	non-CRC	China	98.88	2.25	d__Bacteria;p__Fusobacteriota;c__Fusobacteriia;o__Fusobacteriales;f__Fusobacteriaceae;g__Fusobacterium_A;s__Fusobacterium_A ulcerans	NA	3097387	31.2	3096	600	NA	11_8	2	0
662	YuJ_2015__SZAXPI003428-6__bin.14	Pasolli et al., 2019	non-CRC	China	100	2.25	d__Bacteria;p__Fusobacteriota;c__Fusobacteriia;o__Fusobacteriales;f__Fusobacteriaceae;g__Fusobacterium_A;s__Fusobacterium_A ulcerans	NA	3309888	30.3	3166	101	NA	11_6	2	0
663	HeQ_2017__SZAXPI029475-44__bin.30	Pasolli et al., 2019	non-CRC	China	95.51	2.25	d__Bacteria;p__Fusobacteriota;c__Fusobacteriia;o__Fusobacteriales;f__Fusobacteriaceae;g__Fusobacterium_A;s__GCF_900015295.1	NA	2162457	28.5	2062	61	NA	15_1	0	0
664	CosteaPI_2017__SID713B015-11-90-0__bin.18	Pasolli et al., 2019	non-CRC	Germany	100	0	d__Bacteria;p__Fusobacteriota;c__Fusobacteriia;o__Fusobacteriales;f__Fusobacteriaceae;g__Fusobacterium_B;s__	NA	2138816	30.4	2018	235	NA	10_6	0	0
665	HeQ_2017__RSZAXPI003080-114__bin.1	Pasolli et al., 2019	non-CRC	China	100	0	d__Bacteria;p__Fusobacteriota;c__Fusobacteriia;o__Fusobacteriales;f__Fusobacteriaceae;g__Fusobacterium_B;s__	NA	1844851	32.2	1796	201	NA	8_1	0	0
666	NielsenHB_2014__V1_CD16_0__bin.48	Pasolli et al., 2019	non-CRC	Denmark	100	1.69	d__Bacteria;p__Fusobacteriota;c__Fusobacteriia;o__Fusobacteriales;f__Fusobacteriaceae;g__Fusobacterium_B;s__	NA	1826299	30.2	1743	52	NA	10_8	0	0
667	QinJ_2012__DLM003__bin.18	Pasolli et al., 2019	non-CRC	China	90.64	4.24	d__Bacteria;p__Fusobacteriota;c__Fusobacteriia;o__Fusobacteriales;f__Fusobacteriaceae;g__Fusobacterium_B;s__	NA	1789541	30	2064	438	NA	10_9	0	0
668	YuJ_2015__SZAXPI003431-1__bin.12	Pasolli et al., 2019	non-CRC	China	99.28	2.25	d__Bacteria;p__Fusobacteriota;c__Fusobacteriia;o__Fusobacteriales;f__Fusobacteriaceae;g__Fusobacterium_B;s__	NA	2300306	31.4	2123	149	NA	6_2	0	0
669	YuJ_2015__SZAXPI015228-14__bin.13	Pasolli et al., 2019	non-CRC	China	95.6	0	d__Bacteria;p__Fusobacteriota;c__Fusobacteriia;o__Fusobacteriales;f__Fusobacteriaceae;g__Fusobacterium_B;s__	NA	2255737	29.8	2326	314	NA	10_1	0	0
670	ZeeviD_2015__PNP_Main_130__bin.27	Pasolli et al., 2019	non-CRC	Israel	100	1.12	d__Bacteria;p__Fusobacteriota;c__Fusobacteriia;o__Fusobacteriales;f__Fusobacteriaceae;g__Fusobacterium_B;s__	NA	2339352	31.3	2156	66	NA	6_1	0	0
671	VincentC_2016__MM004.2__bin.17	Pasolli et al., 2019	non-CRC	Canada	98.88	0	d__Bacteria;p__Fusobacteriota;c__Fusobacteriia;o__Fusobacteriales;f__Fusobacteriaceae;g__Fusobacterium_C;s__Fusobacterium_C gonidiaformans	NA	1710464	32.4	1850	139	NA	4_3	0	0
672	VincentC_2016__MM075.2__bin.20	Pasolli et al., 2019	non-CRC	Canada	98.93	0	d__Bacteria;p__Fusobacteriota;c__Fusobacteriia;o__Fusobacteriales;f__Fusobacteriaceae;g__Fusobacterium_C;s__Fusobacterium_C gonidiaformans	NA	1630127	32.6	1750	197	NA	4_3	0	0
673	ZellerG_2014__CCIS12370844ST-4-0__bin.2	Pasolli et al., 2019	non-CRC	France	95.51	0	d__Bacteria;p__Fusobacteriota;c__Fusobacteriia;o__Fusobacteriales;f__Fusobacteriaceae;g__Fusobacterium_C;s__Fusobacterium_C gonidiaformans	NA	1690763	32.6	1749	89	NA	4_3	0	0
674	ZellerG_2014__CCIS65479369ST-4-0__bin.15	Pasolli et al., 2019	non-CRC	France	99.44	0	d__Bacteria;p__Fusobacteriota;c__Fusobacteriia;o__Fusobacteriales;f__Fusobacteriaceae;g__Fusobacterium_C;s__Fusobacterium_C gonidiaformans	NA	1640321	32.5	1645	140	NA	4_2	0	0
675	LiJ_2014__V1.UC39-4__bin.31	Pasolli et al., 2019	non-CRC	China	97.75	0	d__Bacteria;p__Fusobacteriota;c__Fusobacteriia;o__Fusobacteriales;f__Fusobacteriaceae;g__Fusobacterium_C;s__Fusobacterium_C necrophorum	NA	1862680	35.2	1782	28	NA	5_3	0	0
676	ZellerG_2014__CCIS58234805ST-4-0__bin.3	Pasolli et al., 2019	non-CRC	France	100	0	d__Bacteria;p__Fusobacteriota;c__Fusobacteriia;o__Fusobacteriales;f__Fusobacteriaceae;g__Fusobacterium_C;s__Fusobacterium_C necrophorum	NA	2084641	34.9	2019	46	NA	5_2	0	0

## Sheet: Table S8
phylogenetic sort order	clade	MAG ID	GTDB taxonomy	Hong Kong Average	Shenzhen Average	Zhejiang Average	Israel Average	Austria Average	Denmark Average	France Average	Germany Average	Spain Average	Sweden Average	USA Average	El Salvador Average	Fiji Average	Mongolia Average	Peru Average	Tanzania Average	Zymo mock community
1	cetobacterium	GCF_900167275.1_IMG-taxon_2585428148_annotated_assembly_genomic	d__Bacteria;p__Fusobacteriota;c__Fusobacteriia;o__Fusobacteriales;f__Fusobacteriaceae;g__Cetobacterium;s__Cetobacterium ceti	5.73198e-08	1.09242e-07	1.99204e-07	2.89995e-08	0	9.81634e-07	4.22212e-07	0	2.84916e-07	0	6.48255e-08	0	7.41757e-06	2.57287e-08	0	2.12876e-07	0
2	cetobacterium	GCF_000799075.1_ZOR0034.1_genomic	d__Bacteria;p__Fusobacteriota;c__Fusobacteriia;o__Fusobacteriales;f__Fusobacteriaceae;g__Cetobacterium_A;s__Cetobacterium_A sp000799075	0.000410467	0.00132295	0.00103583	0.00176808	0.00305903	0.0017952	0.00225131	0.00332964	0.00194522	0.00216592	0.000784488	0.000375218	0.00119337	0.00066263	0.000509506	0.000727621	0.00392596
3	cetobacterium	PHMST195.8.metabat2102.contigs	d__Bacteria;p__Fusobacteriota;c__Fusobacteriia;o__Fusobacteriales;f__Fusobacteriaceae;g__Cetobacterium_A;s__	0.000245123	4.87731e-05	0.000403624	0.000573942	0.000520264	8.1451e-05	0.000217953	8.8415e-06	0.000291572	0.000392809	3.49755e-05	8.35678e-05	4.34272e-05	4.81322e-06	2.24023e-05	0.000202384	0
4	cetobacterium	M2-PK647A.12.metabat2102.contigs	d__Bacteria;p__Fusobacteriota;c__Fusobacteriia;o__Fusobacteriales;f__Fusobacteriaceae;g__Cetobacterium_A;s__Cetobacterium_A somerae	0.00124018	8.05194e-05	0.000803518	2.20581e-05	3.41837e-05	4.20383e-05	4.9555e-05	7.04035e-06	2.17777e-05	1.1137e-05	8.03696e-06	0.000454114	0.000332639	2.03025e-06	1.00244e-06	4.24511e-06	0
5	cetobacterium	GCF_000479045.1_ASM47904v1_genomic	d__Bacteria;p__Fusobacteriota;c__Fusobacteriia;o__Fusobacteriales;f__Fusobacteriaceae;g__Cetobacterium_A;s__Cetobacterium_A somerae	5.92901e-05	1.36251e-06	0.00436564	1.26306e-05	1.76506e-07	0	1.48567e-07	0	0	1.53906e-07	2.97617e-08	0.000123199	3.00213e-05	8.80606e-08	1.49321e-06	1.51001e-06	0
6	cetobacterium	S4_049.77.metabat2121.contigs	d__Bacteria;p__Fusobacteriota;c__Fusobacteriia;o__Fusobacteriales;f__Fusobacteriaceae;g__Cetobacterium_A;s__Cetobacterium_A somerae	5.43339e-05	3.23579e-07	0.00539584	5.0023e-06	0	0	0	0	0	0	1.3099e-08	5.55933e-05	9.42465e-06	0	0	9.40474e-07	0
7	cetobacterium	ERS537231_106	d__Bacteria;p__Fusobacteriota;c__Fusobacteriia;o__Fusobacteriales;f__Fusobacteriaceae;g__Cetobacterium_A;s__Cetobacterium_A somerae	0.00133286	0.00147576	0.00581474	0.00155082	0.000926447	0.00270184	0.00154785	0.00278561	0.00342695	0.00108668	0.00122294	0.000181075	0.000109257	3.09992e-05	6.94753e-05	0.000172228	0
8	fusobacterium_B	GCF_000622245.1_ASM62224v1_genomic	d__Bacteria;p__Fusobacteriota;c__Fusobacteriia;o__Fusobacteriales;f__Fusobacteriaceae;g__Fusobacterium_B;s__Fusobacterium_B perfoetens	6.73753e-05	3.02505e-05	0.00012544	1.19132e-05	7.34271e-08	7.37341e-08	4.69205e-07	1.52266e-07	2.59655e-06	6.83227e-08	7.00097e-07	0	1.66593e-06	1.65785e-06	2.77882e-07	0	0
9	fusobacterium_B	ERS473221_41	d__Bacteria;p__Fusobacteriota;c__Fusobacteriia;o__Fusobacteriales;f__Fusobacteriaceae;g__Fusobacterium_B;s__	0.00183828	0.000666035	0.00172987	0.00113142	0.000703837	0.000232914	0.00065073	2.37511e-05	0.000780386	0.000291731	0.000274	0.000156098	0.000198681	2.19949e-05	0.000145335	0.000408761	0
10	fusobacterium_B	pHMST436_HF3YCDMXX.16.metabat2102.contigs	d__Bacteria;p__Fusobacteriota;c__Fusobacteriia;o__Fusobacteriales;f__Fusobacteriaceae;g__Fusobacterium_B;s__	0.00208715	0.00060958	0.000886321	0.00889091	0.00245682	0.00145037	0.00150159	0.00163507	0.0018637	0.00166993	0.00186094	0.00185642	0.00142371	0.00261778	0.00260591	0.00151299	0
11	fusobacterium_B	S5_045.25.metabat2102_sub.contigs	d__Bacteria;p__Fusobacteriota;c__Fusobacteriia;o__Fusobacteriales;f__Fusobacteriaceae;g__Fusobacterium_B;s__	8.55621e-05	8.47471e-05	2.37212e-08	0.00015731	2.6562e-08	0	9.96061e-08	0	2.22218e-07	2.96812e-07	2.00143e-07	0	1.20167e-08	1.51718e-08	0	0	0
12	fusobacterium_B	PGHST0050.31.contigs	d__Bacteria;p__Fusobacteriota;c__Fusobacteriia;o__Fusobacteriales;f__Fusobacteriaceae;g__Fusobacterium_B;s__	0.00103716	0.000138916	0.000165635	0.000344285	0.000599831	9.90026e-05	0.000307867	0.000104343	0.000272325	0.000210658	7.24678e-05	0.000179592	9.18631e-05	2.76057e-05	6.66864e-05	0.000209534	0
13	fusobacterium_B	PGHST0005.006.contigs	d__Bacteria;p__Fusobacteriota;c__Fusobacteriia;o__Fusobacteriales;f__Fusobacteriaceae;g__Fusobacterium_B;s__	0.026177	0.0224062	0.0213726	0.0106256	0.00835453	0.0190787	0.0161847	0.00835378	0.0142091	0.00903901	0.0226316	0.00017191	0.000848051	0.0010985	0.000383504	4.21683e-05	0
14	fusobacterium_B	PHMST107.18.metabat2102.contigs	d__Bacteria;p__Fusobacteriota;c__Fusobacteriia;o__Fusobacteriales;f__Fusobacteriaceae;g__Fusobacterium_B;s__	0.00074261	9.85779e-05	4.61671e-05	0.000476771	0.000283833	7.03228e-05	0.000156409	2.4447e-05	0.000274791	9.11223e-05	3.01186e-05	1.89133e-06	1.09268e-05	6.21534e-06	4.62563e-06	8.73144e-06	0
15	fusobacterium_B	ERR1620317_bin.28	d__Bacteria;p__Fusobacteriota;c__Fusobacteriia;o__Fusobacteriales;f__Fusobacteriaceae;g__Fusobacterium_B;s__	7.48533e-05	3.62382e-05	3.19588e-06	2.16656e-05	7.03077e-07	2.55456e-06	3.9216e-06	1.25196e-06	3.71787e-06	1.09117e-06	2.33882e-06	1.12663e-06	2.31687e-06	5.12151e-06	2.05618e-06	2.05068e-06	0
16	fusobacterium_B	S3_031.44.metabat2102.contigs	d__Bacteria;p__Fusobacteriota;c__Fusobacteriia;o__Fusobacteriales;f__Fusobacteriaceae;g__Fusobacterium_B;s__	0.000279698	2.02818e-06	2.8886e-06	1.12876e-06	2.80902e-06	0	7.59044e-07	0	1.00431e-06	4.33281e-07	1.98649e-06	0	1.75433e-07	0	0	0	0
17	fusobacterium_B	ERR1578622_bin.12	d__Bacteria;p__Fusobacteriota;c__Fusobacteriia;o__Fusobacteriales;f__Fusobacteriaceae;g__Fusobacterium_B;s__	8.94887e-05	4.80552e-05	6.65218e-06	4.82496e-05	9.32128e-06	1.69728e-05	1.3514e-05	9.56364e-06	2.43802e-05	3.28258e-05	8.57428e-06	6.22305e-06	4.56603e-06	4.1749e-06	9.66086e-07	4.54204e-05	0
18	fusobacterium_B	PGHST0085.4.metabat2.contigs	d__Bacteria;p__Fusobacteriota;c__Fusobacteriia;o__Fusobacteriales;f__Fusobacteriaceae;g__Fusobacterium_B;s__	0.00259194	4.97546e-05	6.26487e-07	4.0167e-06	0	0	3.85833e-06	3.29049e-07	1.3675e-06	1.9787e-07	8.75417e-07	0	5.31614e-09	1.05855e-06	2.40377e-07	0	0
19	fusobacterium_B	PHMST105.017_sub.contigs	d__Bacteria;p__Fusobacteriota;c__Fusobacteriia;o__Fusobacteriales;f__Fusobacteriaceae;g__Fusobacterium_B;s__	0.00783859	0.00267363	0.00252305	0.0111308	0.0128289	0.00336991	0.00842858	0.00194141	0.00630549	0.00482777	0.00148693	0.000568126	0.000871404	7.18455e-05	0.000726474	0.00195222	0
20	fusobacterium_B	NielsenHB_2014__V1_CD16_0__bin.48	d__Bacteria;p__Fusobacteriota;c__Fusobacteriia;o__Fusobacteriales;f__Fusobacteriaceae;g__Fusobacterium_B;s__	0.000748784	0.000135625	0.000574595	0.00051379	4.0482e-05	0.0001486	1.96694e-05	0	0.00120966	2.94803e-06	0.000180787	9.31433e-07	2.80863e-05	1.81549e-06	3.41148e-06	0	0
21	fusobacterium_B	S4_054.58.metabat2102.contigs	d__Bacteria;p__Fusobacteriota;c__Fusobacteriia;o__Fusobacteriales;f__Fusobacteriaceae;g__Fusobacterium_B;s__	0.000444301	0.00109305	0.000314835	5.35803e-05	7.50279e-05	3.55069e-05	0.000115062	4.88756e-06	0.000219889	1.7206e-05	6.05381e-06	2.24933e-06	1.1025e-05	1.16818e-06	2.22827e-06	1.76366e-05	0
22	fusobacterium_B	QinJ_2012__DLM003__bin.18	d__Bacteria;p__Fusobacteriota;c__Fusobacteriia;o__Fusobacteriales;f__Fusobacteriaceae;g__Fusobacterium_B;s__	0.000735185	0.000395187	0.000320002	0.000269132	1.68975e-05	3.32072e-05	6.97549e-05	8.60879e-07	0.000122264	4.61754e-06	3.20259e-05	4.94081e-07	5.13445e-05	2.79157e-06	1.01689e-06	1.35605e-07	0
23	fusobacterium_B	S4_044.17.metabat2121.contigs	d__Bacteria;p__Fusobacteriota;c__Fusobacteriia;o__Fusobacteriales;f__Fusobacteriaceae;g__Fusobacterium_B;s__	8.223e-05	0.000268403	6.12841e-06	9.02509e-07	0	0	1.50563e-05	0	1.77775e-06	0	6.16264e-07	0	0	5.1297e-07	3.12086e-07	0	0
24	fusobacterium_B	534A.23.metabat2102_sub.contigs	d__Bacteria;p__Fusobacteriota;c__Fusobacteriia;o__Fusobacteriales;f__Fusobacteriaceae;g__Fusobacterium_B;s__	0.00351453	0.00585819	0.00484461	0.001734	0.00073172	0.00461309	0.0024412	0.00492716	0.00456237	0.00401554	0.00441831	0.000112992	0.00028223	0.000679814	0.000270754	3.98775e-05	0
25	fusobacterium_B	pHMST299_HF3YCDMXX.014.contigs	d__Bacteria;p__Fusobacteriota;c__Fusobacteriia;o__Fusobacteriales;f__Fusobacteriaceae;g__Fusobacterium_B;s__	0.00924469	0.00756549	0.00845894	0.0107533	0.00819468	0.00918477	0.0102291	0.00475341	0.00908125	0.00630137	0.00711871	0.000885688	0.00318057	0.000848445	0.000986228	0.000272548	0
26	fusobacterium_B	S2_055.22.metabat2102.contigs	d__Bacteria;p__Fusobacteriota;c__Fusobacteriia;o__Fusobacteriales;f__Fusobacteriaceae;g__Fusobacterium_B;s__	0.000165425	0.000325339	1.66126e-05	2.4247e-06	1.71718e-07	0	8.52545e-06	0	5.15623e-06	5.64858e-07	6.47794e-07	0	5.9263e-08	1.84732e-07	0	0	0
27	fusobacterium_A	GCF_900015295.1_clos_1_1_genomic	d__Bacteria;p__Fusobacteriota;c__Fusobacteriia;o__Fusobacteriales;f__Fusobacteriaceae;g__Fusobacterium_A;s__Fusobacterium_A sp900015295	0.00107765	0.00121091	0.00342904	6.21398e-05	6.74894e-05	2.14311e-05	3.0582e-05	5.51352e-05	1.10249e-05	1.51545e-05	1.83038e-06	1.20741e-05	1.54317e-06	0.00228018	1.51744e-05	9.22429e-06	0.00123536
28	fusobacterium_A	S4_015.30.metabat2102.contigs	d__Bacteria;p__Fusobacteriota;c__Fusobacteriia;o__Fusobacteriales;f__Fusobacteriaceae;g__Fusobacterium_A;s__	0.000357287	0.000151117	0.000293966	9.60242e-06	9.37454e-08	1.42313e-06	0	0	9.86223e-05	1.33773e-07	3.54196e-06	7.40954e-08	4.68945e-06	4.44029e-05	2.01813e-05	0	0
29	fusobacterium_A	ERR209697_bin.20	d__Bacteria;p__Fusobacteriota;c__Fusobacteriia;o__Fusobacteriales;f__Fusobacteriaceae;g__Fusobacterium_A;s__	0.00109196	0.000929537	0.00117604	0.00115686	0.000995602	0.00121062	0.000925335	0.00104777	0.0019818	0.000961258	0.00114749	0.000260452	0.000211514	0.000476045	0.000536879	7.7806e-05	0
30	fusobacterium_A	S6_021.28.metabat2102.contigs	d__Bacteria;p__Fusobacteriota;c__Fusobacteriia;o__Fusobacteriales;f__Fusobacteriaceae;g__Fusobacterium_A;s__	0.00121083	0.0183846	0.00178296	0.00314014	0.00248913	0.00285367	0.00210107	0.0013821	0.00252792	0.00170884	0.00253235	0.00148598	0.00250518	0.00145429	0.0021234	0.00274785	0
31	fusobacterium_A	PHMST208.10.metabat2102.contigs	d__Bacteria;p__Fusobacteriota;c__Fusobacteriia;o__Fusobacteriales;f__Fusobacteriaceae;g__Fusobacterium_A;s__	0.00142104	0.0070605	0.000624835	1.26704e-05	3.16904e-08	4.57957e-08	4.10652e-07	0	4.98052e-06	1.83138e-08	1.02293e-06	0	7.60015e-06	4.97685e-06	0	5.67135e-07	0
32	fusobacterium_A	SRS294816_53	d__Bacteria;p__Fusobacteriota;c__Fusobacteriia;o__Fusobacteriales;f__Fusobacteriaceae;g__Fusobacterium_A;s__Fusobacterium_A mortiferum	0.00222769	0.00300314	0.00386395	0.000121098	5.1274e-05	3.11528e-06	9.4271e-05	2.04706e-07	9.61628e-05	8.16393e-06	6.78473e-05	1.18063e-05	0.000143581	0.000220791	1.81846e-06	0.000152006	0
33	fusobacterium_A	SRS259538_7	d__Bacteria;p__Fusobacteriota;c__Fusobacteriia;o__Fusobacteriales;f__Fusobacteriaceae;g__Fusobacterium_A;s__Fusobacterium_A mortiferum	0.0018543	0.00107916	0.00308411	0.000130036	5.79618e-07	1.73711e-07	2.86375e-06	0	0.000191811	3.68573e-08	7.09069e-05	2.42395e-06	0.000169555	0.000292016	7.16497e-07	0	0
34	fusobacterium_A	WenC_2017__RA084__bin.4	d__Bacteria;p__Fusobacteriota;c__Fusobacteriia;o__Fusobacteriales;f__Fusobacteriaceae;g__Fusobacterium_A;s__Fusobacterium_A mortiferum	0.00316506	0.0026586	0.00527306	0.000550626	0.000632493	0.00072369	0.000760188	0.000571286	0.000848413	0.000495764	0.000895337	0.000238413	0.000271836	0.000458904	0.000101044	2.65171e-05	5.68264e-05
35	fusobacterium_A	SRS023176_24	d__Bacteria;p__Fusobacteriota;c__Fusobacteriia;o__Fusobacteriales;f__Fusobacteriaceae;g__Fusobacterium_A;s__Fusobacterium_A mortiferum	0.00243893	0.00193448	0.00384237	0.000332095	5.335e-05	0.000643404	0.000324882	0.000674326	0.000830111	0.000473605	0.00247973	1.57414e-05	0.000186927	0.000339013	9.19737e-06	1.61609e-06	0
36	fusobacterium_A	GCF_003019315.1_ASM301931v1_genomic	d__Bacteria;p__Fusobacteriota;c__Fusobacteriia;o__Fusobacteriales;f__Fusobacteriaceae;g__Fusobacterium_A;s__Fusobacterium_A mortiferum	0.0333242	0.0268262	0.0629119	0.00181843	1.07652e-05	1.90052e-06	5.26294e-05	0	0.00314236	2.02485e-07	0.0012397	5.97579e-05	0.0024601	0.0051573	8.27821e-06	0	0
37	fusobacterium_A	QinN_2014__LD-75__bin.51	d__Bacteria;p__Fusobacteriota;c__Fusobacteriia;o__Fusobacteriales;f__Fusobacteriaceae;g__Fusobacterium_A;s__Fusobacterium_A mortiferum	0.00240989	0.0016765	0.00403207	0.000127892	1.4721e-06	2.28979e-08	3.32916e-06	0	6.98124e-05	5.30767e-07	6.60747e-05	2.45171e-06	0.000163282	0.00038407	7.15518e-07	0	0
38	fusobacterium_A	PHMST162.31.metabat2121.contigs	d__Bacteria;p__Fusobacteriota;c__Fusobacteriia;o__Fusobacteriales;f__Fusobacteriaceae;g__Fusobacterium_A;s__Fusobacterium_A mortiferum	0.00286834	0.0019984	0.00420122	0.000675756	0.000820593	0.000199559	0.000473066	7.70073e-05	0.000323415	0.000249748	0.000174599	0.00011688	0.000259748	0.000287153	9.61585e-05	0.000259	0
39	fusobacterium_A	GCF_003019655.1_ASM301965v1_genomic	d__Bacteria;p__Fusobacteriota;c__Fusobacteriia;o__Fusobacteriales;f__Fusobacteriaceae;g__Fusobacterium_A;s__Fusobacterium_A varium_B	0.0140681	0.0316828	0.0016729	2.67053e-06	5.61324e-07	1.06631e-07	6.26389e-06	0	3.72278e-07	2.10291e-07	1.68455e-06	0.000106094	1.04215e-06	0	0	1.5442e-07	0
40	fusobacterium_A	ERR1190605_bin.19	d__Bacteria;p__Fusobacteriota;c__Fusobacteriia;o__Fusobacteriales;f__Fusobacteriaceae;g__Fusobacterium_A;s__	0.0123111	0.0229505	0.00649029	0.00324257	0.00173632	0.00291348	0.00365219	0.00166573	0.00361155	0.00241489	0.00323419	0.000373807	0.000598895	0.00027612	0.000176566	0.000293991	0
41	fusobacterium_A	GCF_002356455.1_ASM235645v1_genomic	d__Bacteria;p__Fusobacteriota;c__Fusobacteriia;o__Fusobacteriales;f__Fusobacteriaceae;g__Fusobacterium_A;s__Fusobacterium_A varium_A	0.00382597	0.00350864	6.31736e-05	1.15572e-05	0	0	5.90292e-06	0	1.67832e-06	1.4906e-07	2.20245e-05	7.85247e-07	1.03163e-06	7.17566e-07	0	5.14733e-08	0
42	fusobacterium_A	ERR1190609_bin.10	d__Bacteria;p__Fusobacteriota;c__Fusobacteriia;o__Fusobacteriales;f__Fusobacteriaceae;g__Fusobacterium_A;s__	0.00193483	0.00909304	0.000312776	0.000434513	0.000224833	0.000159465	0.000279605	0.000100599	0.000188288	0.000299875	0.00099357	8.61127e-06	2.47588e-05	3.40387e-06	8.56221e-06	1.20601e-05	0
43	fusobacterium_A	ERR1190574_bin.24	d__Bacteria;p__Fusobacteriota;c__Fusobacteriia;o__Fusobacteriales;f__Fusobacteriaceae;g__Fusobacterium_A;s__	0.00189295	0.00849994	0.00192116	0.00147694	0.00102418	0.00026841	0.00102628	0.000362249	0.000773156	0.000555451	0.000360824	0.000210714	0.000287491	9.68879e-05	0.00014582	0.000571914	0
44	fusobacterium_A	S3_021.31.metabat2121.contigs	d__Bacteria;p__Fusobacteriota;c__Fusobacteriia;o__Fusobacteriales;f__Fusobacteriaceae;g__Fusobacterium_A;s__Fusobacterium_A ulcerans	0.000201016	0.00020549	0.000167816	0.000141029	2.78612e-07	1.60285e-07	3.04863e-05	1.52266e-07	1.75341e-05	2.65694e-06	1.5512e-05	0	1.4715e-06	7.02738e-07	0	0	0
45	fusobacterium_A	LiJ_2017__H3M518116__bin.17	d__Bacteria;p__Fusobacteriota;c__Fusobacteriia;o__Fusobacteriales;f__Fusobacteriaceae;g__Fusobacterium_A;s__Fusobacterium_A ulcerans	0.000795699	0.000722902	0.000958893	0.000852562	0.00100912	0.000695566	0.00492261	0	0.000473045	0.000453686	0.000321152	0.000537955	3.00031e-05	1.79334e-05	8.0917e-05	2.23417e-05	0
46	fusobacterium_A	GCF_000242995.2_Fusobacterium_sp_12_1B_V2_genomic	d__Bacteria;p__Fusobacteriota;c__Fusobacteriia;o__Fusobacteriales;f__Fusobacteriaceae;g__Fusobacterium_A;s__Fusobacterium_A ulcerans	0.000353754	0.000272917	0.000500145	0.000104885	4.53502e-07	0	8.96438e-05	0	1.22486e-05	1.10291e-05	2.63009e-05	7.13291e-07	1.96197e-07	2.61307e-08	0	4.81296e-08	0
47	fusobacterium_A	ERR414375_bin.2	d__Bacteria;p__Fusobacteriota;c__Fusobacteriia;o__Fusobacteriales;f__Fusobacteriaceae;g__Fusobacterium_A;s__Fusobacterium_A ulcerans	0.00204648	0.00124519	0.00119678	0.00188551	0.00154171	0.000211225	0.00106094	0.000242561	0.0021075	0.000795881	0.000296943	0.000198281	0.000224137	2.79461e-05	0.000205507	1.06103e-05	0
48	fusobacterium_A	S6_007.9.metabat2102.contigs	d__Bacteria;p__Fusobacteriota;c__Fusobacteriia;o__Fusobacteriales;f__Fusobacteriaceae;g__Fusobacterium_A;s__Fusobacterium_A ulcerans	0.00109988	0.000255651	0.0014431	0.000485771	1.66478e-07	1.76987e-07	5.26588e-05	0	3.38484e-05	1.79978e-06	0.000247189	2.50856e-07	0	3.20436e-07	0	0	0
49	fusobacterium_A	CosteaPI_2017__donald4-11-7-0__bin.5	d__Bacteria;p__Fusobacteriota;c__Fusobacteriia;o__Fusobacteriales;f__Fusobacteriaceae;g__Fusobacterium_A;s__Fusobacterium_A ulcerans	0.000481075	0.000495483	0.000691278	7.79306e-05	3.74575e-07	0	3.53471e-05	0	4.5313e-06	1.51189e-06	1.38503e-05	0	1.39839e-08	4.6704e-07	0	0	0
50	fusobacterium_A	GCF_900478315.1_34903_E01_genomic	d__Bacteria;p__Fusobacteriota;c__Fusobacteriia;o__Fusobacteriales;f__Fusobacteriaceae;g__Fusobacterium_A;s__Fusobacterium_A ulcerans	0.000239729	0.000334123	0.000274109	5.69112e-05	6.08849e-07	0	5.47754e-05	0	1.58349e-05	3.13026e-06	1.6253e-05	3.62721e-07	2.39741e-08	2.18491e-07	0	0	0
51	fusobacterium_A	ERR1190611_bin.2	d__Bacteria;p__Fusobacteriota;c__Fusobacteriia;o__Fusobacteriales;f__Fusobacteriaceae;g__Fusobacterium_A;s__Fusobacterium_A ulcerans	0.000854107	0.000857241	0.000790115	0.000524631	0.00132737	0.000276586	0.000458452	4.01608e-05	0.000388797	0.000195533	0.000183968	8.3801e-05	7.85481e-05	3.74426e-05	0.00014042	1.64007e-05	0
52	fusobacterium_A	PHMST205.24.metabat2102.contigs	d__Bacteria;p__Fusobacteriota;c__Fusobacteriia;o__Fusobacteriales;f__Fusobacteriaceae;g__Fusobacterium_A;s__	0.00113463	0.000884896	0.000425783	4.8797e-06	0	0	7.03566e-08	0	5.36742e-06	0	7.23619e-07	0	3.44859e-05	0	0	2.07091e-05	0
53	fusobacterium_A	BackhedF_2015__SID385_12M__bin.43	d__Bacteria;p__Fusobacteriota;c__Fusobacteriia;o__Fusobacteriales;f__Fusobacteriaceae;g__Fusobacterium_A;s__	0.000187736	0.000164368	0.000243392	2.53956e-05	1.04599e-05	4.45132e-07	8.14528e-06	0	1.58437e-05	6.16043e-06	4.90702e-06	1.46546e-07	6.86762e-06	1.34319e-05	4.66618e-06	0	0
54	fusobacterium_A	VogtmannE_2016__MMRS72802364ST-27-0-0__bin.41	d__Bacteria;p__Fusobacteriota;c__Fusobacteriia;o__Fusobacteriales;f__Fusobacteriaceae;g__Fusobacterium_A;s__	0.00139216	0.00157425	0.00150961	0.00253527	0.00210924	0.000996343	0.00196596	0.000392225	0.00109366	0.00118477	0.001036	0.000459815	0.000345952	2.15328e-05	0.0002963	0.000676395	0
55	fusobacterium_A	SRR341651_bin.15	d__Bacteria;p__Fusobacteriota;c__Fusobacteriia;o__Fusobacteriales;f__Fusobacteriaceae;g__Fusobacterium_A;s__	0.000258793	0.0115873	0.000878132	0.000123331	6.96817e-05	9.59337e-05	8.87874e-05	2.6828e-05	8.48859e-05	5.7289e-05	0.00011394	4.50803e-06	1.36768e-05	6.81329e-06	2.82257e-06	8.33772e-06	0
56	fusobacterium_A	SRR341650_bin.10	d__Bacteria;p__Fusobacteriota;c__Fusobacteriia;o__Fusobacteriales;f__Fusobacteriaceae;g__Fusobacterium_A;s__	0.000948009	0.0119375	0.00148246	0.000392096	0.000318256	0.00040324	0.000462805	0.000180485	0.00039833	0.000459923	0.000756002	6.1413e-05	6.63079e-05	2.02456e-05	8.03809e-05	7.47516e-05	0
57	fusobacterium_A	QinJ_2012__T2D-059__bin.19	d__Bacteria;p__Fusobacteriota;c__Fusobacteriia;o__Fusobacteriales;f__Fusobacteriaceae;g__Fusobacterium_A;s__	0.00107036	0.00304187	0.00184315	0.00117261	0.000273581	0.0011975	0.000765953	0.000394688	0.000680798	0.000586041	0.00183228	5.12586e-05	0.000274523	6.9694e-05	1.77825e-05	4.19646e-05	0
58	fusobacterium_A	SRR5056852_bin.96	d__Bacteria;p__Fusobacteriota;c__Fusobacteriia;o__Fusobacteriales;f__Fusobacteriaceae;g__Fusobacterium_A;s__	0.000314992	0.000272679	0.000360503	0.000338456	0.000581561	0.000120436	0.00030823	0.00024208	0.000275293	0.000296303	8.46148e-05	5.56133e-05	0.000203572	1.88186e-05	6.5452e-05	8.16148e-05	0
59	fusobacterium_A	QinN_2014__LV-17__bin.7	d__Bacteria;p__Fusobacteriota;c__Fusobacteriia;o__Fusobacteriales;f__Fusobacteriaceae;g__Fusobacterium_A;s__	0.000392167	0.00117027	0.00108415	6.61599e-05	8.17614e-06	0.000126577	0.000125556	0.000204548	0.000134909	0.000101196	0.00035718	4.95293e-06	1.03385e-05	7.69451e-07	1.35517e-06	0	0
60	fusobacterium_A	S3_045.023.contigs	d__Bacteria;p__Fusobacteriota;c__Fusobacteriia;o__Fusobacteriales;f__Fusobacteriaceae;g__Fusobacterium_A;s__	0.000188105	0.000656965	0.000428773	5.58725e-05	4.36568e-05	3.25071e-05	5.14556e-05	2.0381e-05	0.00021198	4.11449e-05	8.81865e-06	3.27686e-06	6.71356e-06	1.637e-06	2.32569e-06	5.71609e-06	0
61	fusobacterium_A	WenC_2017__RA074__bin.38	d__Bacteria;p__Fusobacteriota;c__Fusobacteriia;o__Fusobacteriales;f__Fusobacteriaceae;g__Fusobacterium_A;s__	0.000586269	0.000580994	0.0030964	0.0002966	0.000116195	0.000238745	0.000174056	0.000411185	0.000234934	0.000218822	0.000627096	2.45335e-05	3.22043e-05	5.04865e-05	1.07464e-05	6.82617e-07	0
62	fusobacterium_A	pHMST450.24.metabat2102.contigs	d__Bacteria;p__Fusobacteriota;c__Fusobacteriia;o__Fusobacteriales;f__Fusobacteriaceae;g__Fusobacterium_A;s__	0.000334135	0.000670148	0.000363072	5.82168e-06	0	0	0	0	9.05966e-07	0	2.49054e-07	0	2.36499e-07	0	0	1.63269e-07	0
63	fusobacterium_A	SRR341703_bin.5	d__Bacteria;p__Fusobacteriota;c__Fusobacteriia;o__Fusobacteriales;f__Fusobacteriaceae;g__Fusobacterium_A;s__	0.000238803	0.000555898	0.000438329	0.000148005	0.000416133	1.41317e-05	0.000149646	8.81746e-06	0.000123756	9.60867e-05	2.61005e-05	1.59871e-05	2.05786e-05	4.81828e-07	4.19153e-06	2.23587e-05	0
64	fusobacterium_A	SRR5275410_bin.24	d__Bacteria;p__Fusobacteriota;c__Fusobacteriia;o__Fusobacteriales;f__Fusobacteriaceae;g__Fusobacterium_A;s__	0.000798603	0.000838753	0.00129246	0.00102337	0.000882022	0.000762562	0.000977646	0.00130327	0.000917581	0.00049428	0.000315681	0.000102641	0.000348478	6.72224e-05	4.96401e-05	6.07548e-05	0
65	fusobacterium_A	PHMST261.18.metabat2102_sub.contigs	d__Bacteria;p__Fusobacteriota;c__Fusobacteriia;o__Fusobacteriales;f__Fusobacteriaceae;g__Fusobacterium_A;s__	0.000488204	0.000909521	0.000659495	0.000843645	0.000626368	0.000118867	0.000293735	0.000159119	0.000325623	0.000330585	5.53628e-05	0.000218957	0.000190399	1.47656e-05	0.000238155	0.000423114	0
66	fusobacterium_A	PHMST203.15.metabat2102.contigs	d__Bacteria;p__Fusobacteriota;c__Fusobacteriia;o__Fusobacteriales;f__Fusobacteriaceae;g__Fusobacterium_A;s__	0.00104979	0.00147007	0.000759606	0.000487458	0.000141088	2.38629e-05	0.000128508	2.73013e-05	0.000106156	4.63003e-05	5.71246e-05	3.18035e-06	8.74401e-05	1.11307e-06	3.9644e-06	1.07421e-06	0
67	fusobacterium_A	SRS294858_1	d__Bacteria;p__Fusobacteriota;c__Fusobacteriia;o__Fusobacteriales;f__Fusobacteriaceae;g__Fusobacterium_A;s__	0.000327144	0.000645154	0.000647052	0.000298484	0.000317836	0.000130238	0.000321427	6.89345e-05	0.000196782	0.000155366	0.000171285	6.04909e-05	8.77612e-05	1.8301e-05	1.32877e-05	0.000134975	0
68	fusobacterium_A	QinJ_2012__T2D-107__bin.31	d__Bacteria;p__Fusobacteriota;c__Fusobacteriia;o__Fusobacteriales;f__Fusobacteriaceae;g__Fusobacterium_A;s__	0.00073547	0.00102635	0.000732139	0.00126836	0.00121063	0.000577048	0.00186404	0.00034775	0.00105337	0.000951396	0.000228295	7.58177e-05	9.39673e-05	1.34899e-05	0.000214689	8.22875e-06	0
69	fusobacterium_A	LiJ_2017__H3M516804__bin.49	d__Bacteria;p__Fusobacteriota;c__Fusobacteriia;o__Fusobacteriales;f__Fusobacteriaceae;g__Fusobacterium_A;s__	0.00271413	0.00496053	0.00643189	0.00503546	0.00310126	0.00184343	0.00357847	0.00113323	0.00209297	0.00167625	0.000888584	0.000799142	0.00123608	0.000101762	0.000811188	0.0018067	0
70	fusobacterium_A	534A.003.contigs	d__Bacteria;p__Fusobacteriota;c__Fusobacteriia;o__Fusobacteriales;f__Fusobacteriaceae;g__Fusobacterium_A;s__	0.0115588	0.00909001	0.00975662	0.00959607	0.00902311	0.00590183	0.00672216	0.00461512	0.00786002	0.00599642	0.00954807	0.000618733	0.000779002	0.00141548	0.00432533	0.000228764	8.15335e-05
71	fusobacterium_A	S5_032.27.metabat2102.contigs	d__Bacteria;p__Fusobacteriota;c__Fusobacteriia;o__Fusobacteriales;f__Fusobacteriaceae;g__Fusobacterium_A;s__	0.00390228	0.000456999	0.000386226	0.000253961	0.000380129	0.000269892	0.000401684	0.000129832	0.000470122	0.000160824	0.000151929	1.62069e-05	3.24959e-05	1.14913e-05	6.14163e-06	6.4637e-05	0
72	fusobacterium_A	M2-PK017A.13.metabat2102.contigs	d__Bacteria;p__Fusobacteriota;c__Fusobacteriia;o__Fusobacteriales;f__Fusobacteriaceae;g__Fusobacterium_A;s__	0.00066645	0.000961264	0.000816536	0.000416442	0.000185854	3.20185e-05	0.0001453	4.8551e-05	6.23538e-05	7.40288e-05	5.48388e-05	1.13901e-05	8.36493e-05	1.05486e-05	1.29538e-05	1.04111e-05	0
73	fusobacterium_A	pHMST454.21.metabat2102.contigs	d__Bacteria;p__Fusobacteriota;c__Fusobacteriia;o__Fusobacteriales;f__Fusobacteriaceae;g__Fusobacterium_A;s__	0.00289851	0.000219855	0.000197906	1.6802e-05	0	0	0	0	2.03073e-05	0	5.2796e-07	0	2.24084e-06	3.26587e-08	0	5.20693e-07	0
74	fusobacterium_A	M118A.008_sub.contigs	d__Bacteria;p__Fusobacteriota;c__Fusobacteriia;o__Fusobacteriales;f__Fusobacteriaceae;g__Fusobacterium_A;s__	0.0124756	0.00916864	0.00831391	0.00536483	0.00512096	0.017172	0.0161293	0.000627987	0.0105519	0.00383121	0.013234	0.000380489	0.000537896	0.00212487	0.00128357	0.000396968	0
75	fusobacterium_C	GCF_003019695.1_ASM301969v1_genomic	d__Bacteria;p__Fusobacteriota;c__Fusobacteriia;o__Fusobacteriales;f__Fusobacteriaceae;g__Fusobacterium_C;s__Fusobacterium_C gonidiaformans	3.60459e-06	1.32547e-06	1.47254e-06	8.21652e-05	5.46853e-07	1.92173e-05	2.5265e-06	0	0.00037665	8.63827e-05	6.89477e-06	1.11467e-05	6.56916e-05	3.06124e-06	4.6854e-05	0.000147247	0
76	fusobacterium_C	GCF_001546395.1_ASM154639v1_genomic	d__Bacteria;p__Fusobacteriota;c__Fusobacteriia;o__Fusobacteriales;f__Fusobacteriaceae;g__Fusobacterium_C;s__Fusobacterium_C gonidiaformans	0.000278099	0.000189719	0.000205356	0.000913139	0.000201483	7.43399e-05	0.000186605	2.77703e-05	0.000717032	0.000284808	6.44236e-05	0.000460031	8.21289e-05	7.62695e-05	0.00012677	0.000477508	0
77	fusobacterium_C	GCF_000158235.1_ASM15823v1_genomic	d__Bacteria;p__Fusobacteriota;c__Fusobacteriia;o__Fusobacteriales;f__Fusobacteriaceae;g__Fusobacterium_C;s__Fusobacterium_C gonidiaformans	6.05315e-06	1.73941e-06	1.09066e-05	0.000125426	8.12996e-06	2.92595e-05	1.49788e-05	4.82278e-07	0.000454719	9.17671e-05	1.96559e-05	7.395e-06	5.79007e-05	3.58737e-06	9.56866e-05	5.50909e-05	0
78	fusobacterium_C	GCF_900104395.1_IMG-taxon_2597490366_annotated_assembly_genomic	d__Bacteria;p__Fusobacteriota;c__Fusobacteriia;o__Fusobacteriales;f__Fusobacteriaceae;g__Fusobacterium_C;s__Fusobacterium_C necrophorum	6.22161e-06	8.36005e-07	1.07054e-06	3.8617e-06	3.73357e-07	3.86184e-06	2.42032e-06	6.09066e-07	2.51963e-05	1.25287e-06	5.15634e-07	0	6.48591e-07	1.17789e-07	1.78464e-07	7.67977e-07	0
79	fusobacterium_C	GCF_003019715.1_ASM301971v1_genomic	d__Bacteria;p__Fusobacteriota;c__Fusobacteriia;o__Fusobacteriales;f__Fusobacteriaceae;g__Fusobacterium_C;s__Fusobacterium_C necrophorum	8.37598e-06	8.44528e-07	1.45786e-06	2.18502e-05	2.92277e-06	1.58029e-06	7.56269e-06	0	1.99418e-05	4.35847e-06	2.51152e-06	1.7545e-06	2.21246e-06	2.58464e-06	2.25213e-07	2.91338e-06	0
80	fusobacterium_C	GCF_001596485.1_ASM159648v1_genomic	d__Bacteria;p__Fusobacteriota;c__Fusobacteriia;o__Fusobacteriales;f__Fusobacteriaceae;g__Fusobacterium_C;s__Fusobacterium_C necrophorum	6.29818e-06	1.06882e-06	1.54232e-07	2.1429e-06	0	2.94107e-07	2.11696e-06	3.04533e-07	4.24477e-05	5.26663e-06	1.11796e-06	5.67137e-08	7.17097e-07	2.73438e-06	8.92322e-08	8.13949e-07	0
81	fusobacterium_C	GCF_000622045.1_ASM62204v1_genomic	d__Bacteria;p__Fusobacteriota;c__Fusobacteriia;o__Fusobacteriales;f__Fusobacteriaceae;g__Fusobacterium_C;s__Fusobacterium_C necrophorum	1.5096e-05	3.53457e-07	4.93591e-07	4.76719e-06	7.32403e-07	3.79981e-06	1.07809e-05	0	1.81153e-05	6.95487e-06	1.57053e-06	6.70534e-08	4.5922e-07	4.19236e-07	0	1.01744e-07	0
82	fusobacterium	GCF_000381725.1_ASM38172v1_genomic	d__Bacteria;p__Fusobacteriota;c__Fusobacteriia;o__Fusobacteriales;f__Fusobacteriaceae;g__Fusobacterium;s__Fusobacterium russii	1.20159e-07	2.91411e-07	8.40371e-08	5.71564e-06	1.47363e-07	1.19451e-07	1.09689e-06	1.52266e-07	4.49954e-06	5.50057e-06	3.01622e-07	0	2.65307e-07	1.04886e-07	0	0	0
83	fusobacterium	HMP_2012__SRS013946__bin.14	d__Bacteria;p__Fusobacteriota;c__Fusobacteriia;o__Fusobacteriales;f__Fusobacteriaceae;g__Fusobacterium;s__Fusobacterium massiliense	4.48992e-08	1.093e-07	1.45715e-07	5.61943e-07	2.88533e-08	8.91649e-08	0	0	2.86582e-07	4.41447e-08	1.30947e-07	0	1.0148e-07	9.28524e-08	0	0	0
84	fusobacterium	GCF_900095705.1_PRJEB15286_genomic	d__Bacteria;p__Fusobacteriota;c__Fusobacteriia;o__Fusobacteriales;f__Fusobacteriaceae;g__Fusobacterium;s__Fusobacterium massiliense	8.34668e-07	2.31414e-06	6.19488e-07	2.83872e-06	1.30557e-07	2.32993e-08	2.01733e-07	0	1.31142e-06	1.60326e-07	1.86175e-07	0	4.98414e-07	1.54949e-07	0	1.01744e-07	0
85	fusobacterium	HMP_2012__SRS053854__bin.9	d__Bacteria;p__Fusobacteriota;c__Fusobacteriia;o__Fusobacteriales;f__Fusobacteriaceae;g__Fusobacterium;s__Fusobacterium periodonticum	7.05861e-06	5.43838e-06	4.2808e-06	2.41761e-05	1.18733e-05	9.13411e-06	2.36045e-05	1.86554e-06	2.07308e-05	5.86282e-06	1.21604e-05	3.13073e-06	3.22878e-06	1.11327e-06	2.25213e-07	9.72182e-07	0
86	fusobacterium	HMP_2012__SRS065335__bin.4	d__Bacteria;p__Fusobacteriota;c__Fusobacteriia;o__Fusobacteriales;f__Fusobacteriaceae;g__Fusobacterium;s__Fusobacterium periodonticum	5.29212e-06	3.53537e-06	4.44042e-06	9.68155e-06	2.72775e-06	4.1752e-06	5.56028e-06	3.28087e-07	8.32985e-06	2.30276e-06	3.87234e-06	1.93585e-06	4.13764e-06	5.68107e-07	3.50469e-07	7.96839e-07	0
87	fusobacterium	GCF_002763695.1_ASM276369v1_genomic	d__Bacteria;p__Fusobacteriota;c__Fusobacteriia;o__Fusobacteriales;f__Fusobacteriaceae;g__Fusobacterium;s__Fusobacterium periodonticum_D	3.01861e-05	1.06532e-05	2.015e-05	3.92268e-05	1.73573e-05	2.2727e-06	1.89845e-05	1.5191e-06	3.21361e-06	1.12793e-05	6.37866e-06	3.60768e-05	6.84405e-06	5.70785e-06	5.98685e-06	2.30578e-05	0
88	fusobacterium	HMP_2012__SRS018591__bin.29	d__Bacteria;p__Fusobacteriota;c__Fusobacteriia;o__Fusobacteriales;f__Fusobacteriaceae;g__Fusobacterium;s__Fusobacterium periodonticum	5.62269e-06	1.56258e-05	1.11625e-05	1.98011e-05	1.24347e-05	4.94073e-06	2.36209e-05	0	1.53586e-05	7.26101e-06	4.24069e-06	2.93523e-06	3.64193e-06	7.25348e-07	2.27261e-06	2.08028e-06	0
89	fusobacterium	HMP_2012__SRS017120__bin.10	d__Bacteria;p__Fusobacteriota;c__Fusobacteriia;o__Fusobacteriales;f__Fusobacteriaceae;g__Fusobacterium;s__Fusobacterium periodonticum	8.05808e-05	6.87638e-05	5.30199e-05	6.62742e-05	8.15393e-05	5.94434e-05	0.000117242	4.42535e-06	8.90753e-05	4.94167e-05	3.22875e-05	5.92136e-05	5.01261e-05	9.79194e-06	2.12783e-05	1.29441e-05	0
90	fusobacterium	GCF_000297655.1_Fuso_PO_Taxon_201_D10_V1_genomic	d__Bacteria;p__Fusobacteriota;c__Fusobacteriia;o__Fusobacteriales;f__Fusobacteriaceae;g__Fusobacterium;s__Fusobacterium periodonticum_D	8.14009e-07	8.47554e-07	4.71587e-07	1.19866e-05	5.23884e-07	9.69969e-08	6.97878e-07	0	2.66055e-07	3.86669e-07	1.11599e-06	1.80878e-07	1.41061e-06	5.10557e-08	0	7.45118e-07	0
91	fusobacterium	GCF_003019755.1_ASM301975v1_genomic	d__Bacteria;p__Fusobacteriota;c__Fusobacteriia;o__Fusobacteriales;f__Fusobacteriaceae;g__Fusobacterium;s__Fusobacterium periodonticum_D	1.52477e-06	1.96122e-06	8.67279e-07	1.60074e-05	2.22742e-06	4.01571e-07	2.3349e-06	0	1.68842e-07	8.43753e-07	2.47521e-06	3.80886e-06	2.34509e-06	4.09107e-07	2.86862e-07	3.793e-06	0
92	fusobacterium	HMP_2012__SRS019045__bin.8	d__Bacteria;p__Fusobacteriota;c__Fusobacteriia;o__Fusobacteriales;f__Fusobacteriaceae;g__Fusobacterium;s__Fusobacterium periodonticum	2.74612e-05	2.00818e-05	1.01284e-05	4.52537e-05	2.76708e-05	1.58181e-05	4.27938e-05	7.82429e-07	2.10273e-05	9.36558e-06	9.50293e-06	8.67054e-06	1.40746e-05	2.22275e-06	1.65799e-06	3.39571e-06	0
93	fusobacterium	HMP_2012__SRS013879__bin.12	d__Bacteria;p__Fusobacteriota;c__Fusobacteriia;o__Fusobacteriales;f__Fusobacteriaceae;g__Fusobacterium;s__	3.05172e-05	5.39303e-05	1.4386e-05	5.11374e-05	2.33544e-05	2.48067e-05	3.2039e-05	1.03122e-06	6.50988e-05	1.31292e-05	1.40592e-05	2.39859e-05	1.51624e-05	4.58159e-06	2.2415e-05	9.30184e-06	0
94	fusobacterium	QinN_2014__LD-44__bin.19	d__Bacteria;p__Fusobacteriota;c__Fusobacteriia;o__Fusobacteriales;f__Fusobacteriaceae;g__Fusobacterium;s__Fusobacterium periodonticum_C	0.00161409	0.00148791	0.00244887	0.00182866	0.00138205	0.00112925	0.00219758	0.000670221	0.00119521	0.000703932	0.00069048	0.000711316	0.000690102	9.06257e-05	0.000289572	0.000438508	0
95	fusobacterium	GCF_002763625.1_ASM276362v1_genomic	d__Bacteria;p__Fusobacteriota;c__Fusobacteriia;o__Fusobacteriales;f__Fusobacteriaceae;g__Fusobacterium;s__Fusobacterium periodonticum_C	4.46488e-06	2.03376e-05	5.48015e-06	1.5005e-06	4.35769e-07	1.27738e-07	1.19365e-06	0	1.75948e-07	3.76128e-07	6.99107e-07	7.23898e-07	1.45221e-06	2.12162e-06	0	4.32397e-07	0
96	fusobacterium	GCF_002761955.1_ASM276195v1_genomic	d__Bacteria;p__Fusobacteriota;c__Fusobacteriia;o__Fusobacteriales;f__Fusobacteriaceae;g__Fusobacterium;s__Fusobacterium periodonticum_C	0.000244466	9.25482e-05	0.000100388	8.82586e-05	0.000111428	1.12662e-06	9.78437e-05	4.42884e-06	6.72799e-07	7.19499e-05	2.22909e-05	0.000492368	1.42889e-05	5.76858e-05	8.09418e-05	1.34561e-05	0
97	fusobacterium	GCF_002763815.1_ASM276381v1_genomic	d__Bacteria;p__Fusobacteriota;c__Fusobacteriia;o__Fusobacteriales;f__Fusobacteriaceae;g__Fusobacterium;s__Fusobacterium periodonticum_C	2.66361e-06	1.13529e-05	1.30498e-06	5.90944e-07	8.45653e-08	1.33201e-07	6.89929e-08	0	1.68543e-07	1.04274e-07	5.89631e-07	0	2.93724e-07	1.11665e-06	0	2.43119e-07	0
98	fusobacterium	GCF_002763735.1_ASM276373v1_genomic	d__Bacteria;p__Fusobacteriota;c__Fusobacteriia;o__Fusobacteriales;f__Fusobacteriaceae;g__Fusobacterium;s__Fusobacterium periodonticum_C	2.61167e-06	1.01019e-05	1.80508e-06	4.06123e-07	1.54522e-07	2.24073e-08	2.14198e-08	0	6.24175e-08	3.37152e-08	3.83436e-07	8.44818e-08	4.32748e-07	9.18489e-07	0	0	0
99	fusobacterium	GCF_002763595.1_ASM276359v1_genomic	d__Bacteria;p__Fusobacteriota;c__Fusobacteriia;o__Fusobacteriales;f__Fusobacteriaceae;g__Fusobacterium;s__Fusobacterium periodonticum_C	2.64871e-06	7.71568e-06	1.60911e-06	5.87313e-07	7.917e-08	1.46347e-06	1.95366e-07	0	7.92355e-07	1.52694e-07	4.90639e-07	1.09117e-07	3.52361e-07	9.35768e-07	0	5.85071e-07	0
100	fusobacterium	GCF_002761935.1_ASM276193v1_genomic	d__Bacteria;p__Fusobacteriota;c__Fusobacteriia;o__Fusobacteriales;f__Fusobacteriaceae;g__Fusobacterium;s__Fusobacterium periodonticum_C	0.000343955	0.000162224	0.000208591	0.000170093	0.000178966	3.81229e-06	0.000179951	1.24012e-05	8.08507e-06	0.000121678	4.62369e-05	0.000581561	2.27436e-05	0.000156559	9.16568e-05	6.41051e-05	0
101	fusobacterium	HMP_2012__SRS044662__bin.14	d__Bacteria;p__Fusobacteriota;c__Fusobacteriia;o__Fusobacteriales;f__Fusobacteriaceae;g__Fusobacterium;s__Fusobacterium periodonticum_C	0.000359543	0.000529973	0.000402762	5.05442e-05	6.2078e-05	7.54758e-06	1.69634e-05	6.22522e-06	2.0153e-05	2.36214e-05	1.46225e-05	1.82712e-05	1.016e-05	7.57182e-06	1.81526e-06	2.51798e-05	0
102	fusobacterium	GCF_002763925.1_ASM276392v1_genomic	d__Bacteria;p__Fusobacteriota;c__Fusobacteriia;o__Fusobacteriales;f__Fusobacteriaceae;g__Fusobacterium;s__Fusobacterium periodonticum_C	3.02195e-06	7.0496e-06	1.61624e-06	1.06865e-06	1.11785e-07	6.72912e-08	9.65949e-08	0	9.62927e-08	3.35919e-08	2.94424e-07	0	5.20199e-07	6.78273e-07	0	0	0
103	fusobacterium	GCF_002763775.1_ASM276377v1_genomic	d__Bacteria;p__Fusobacteriota;c__Fusobacteriia;o__Fusobacteriales;f__Fusobacteriaceae;g__Fusobacterium;s__Fusobacterium periodonticum_C	3.13164e-06	7.60042e-06	1.52843e-06	1.17905e-07	3.70348e-08	1.31276e-07	1.72222e-07	0	1.17957e-07	0	2.44006e-07	0	4.45003e-07	6.93161e-07	0	0	0
104	fusobacterium	ERR1305880_bin.1	d__Bacteria;p__Fusobacteriota;c__Fusobacteriia;o__Fusobacteriales;f__Fusobacteriaceae;g__Fusobacterium;s__Fusobacterium periodonticum	0.000950531	0.0007074	0.000764348	0.00216503	0.00378873	0.00128652	0.00190157	0.00066581	0.00179814	0.00135712	0.000663585	0.000731447	0.00078928	0.00027898	0.000383596	0.000765734	0
105	fusobacterium	HMP_2012__SRS062761__bin.9	d__Bacteria;p__Fusobacteriota;c__Fusobacteriia;o__Fusobacteriales;f__Fusobacteriaceae;g__Fusobacterium;s__Fusobacterium periodonticum	5.4615e-05	4.4291e-05	2.3696e-05	6.03878e-05	0.000157279	4.61652e-05	0.000133098	2.6348e-06	6.5933e-05	4.26291e-05	2.51767e-05	2.7916e-05	2.49593e-05	8.55957e-06	1.5525e-05	6.84879e-06	0
106	fusobacterium	HMP_2012__SRS011243__bin.1	d__Bacteria;p__Fusobacteriota;c__Fusobacteriia;o__Fusobacteriales;f__Fusobacteriaceae;g__Fusobacterium;s__Fusobacterium periodonticum	7.79739e-05	6.40409e-05	3.73138e-05	9.67455e-05	0.000641218	7.2902e-05	0.000210224	6.88994e-06	0.00010974	6.84568e-05	3.9921e-05	5.91681e-05	3.04797e-05	1.90121e-05	1.28546e-05	1.55748e-05	0
107	fusobacterium	HMP_2012__SRS063193__bin.25	d__Bacteria;p__Fusobacteriota;c__Fusobacteriia;o__Fusobacteriales;f__Fusobacteriaceae;g__Fusobacterium;s__Fusobacterium periodonticum	7.37303e-05	1.67141e-05	7.60852e-06	5.29054e-05	0.000120173	1.6703e-05	0.000220596	1.43763e-06	7.98063e-05	7.68702e-05	5.42228e-06	2.51207e-05	3.43196e-05	1.90403e-05	6.83884e-05	3.27672e-06	0
108	fusobacterium	HMP_2012__SRS022530__bin.42	d__Bacteria;p__Fusobacteriota;c__Fusobacteriia;o__Fusobacteriales;f__Fusobacteriaceae;g__Fusobacterium;s__	9.04079e-07	2.76233e-06	6.31007e-07	1.16031e-06	5.25535e-07	4.17456e-08	1.55877e-06	0	2.66765e-07	6.5584e-08	1.22797e-06	5.17242e-07	4.60795e-07	4.26914e-07	0	3.39044e-07	0
109	fusobacterium	HMP_2012__SRS016501__bin.16	d__Bacteria;p__Fusobacteriota;c__Fusobacteriia;o__Fusobacteriales;f__Fusobacteriaceae;g__Fusobacterium;s__Fusobacterium periodonticum	7.40527e-06	3.04851e-06	2.6979e-06	9.82084e-06	1.40509e-05	2.47409e-06	2.85865e-05	1.44802e-06	6.84876e-06	2.43576e-06	4.52033e-06	8.8022e-06	2.61015e-06	7.63542e-07	3.53827e-06	2.84592e-06	0
110	fusobacterium	HMP_2012__SRS015644__bin.15	d__Bacteria;p__Fusobacteriota;c__Fusobacteriia;o__Fusobacteriales;f__Fusobacteriaceae;g__Fusobacterium;s__	1.54641e-05	6.14753e-06	3.60495e-06	3.16022e-05	9.54252e-05	3.29557e-05	8.47949e-05	1.97756e-06	4.3196e-05	1.96724e-05	8.56277e-06	1.28164e-05	7.12085e-06	6.23612e-06	9.82729e-06	4.96276e-06	0
111	fusobacterium	HMP_2012__SRS011140__bin.15	d__Bacteria;p__Fusobacteriota;c__Fusobacteriia;o__Fusobacteriales;f__Fusobacteriaceae;g__Fusobacterium;s__Fusobacterium periodonticum	0.000174875	8.96027e-05	7.71081e-05	0.000151925	0.000548105	7.36857e-05	0.000486721	4.06191e-06	0.000160074	0.000114488	3.63362e-05	0.000117897	6.97616e-05	1.36148e-05	5.63716e-05	2.93642e-05	0
112	fusobacterium	HMP_2012__SRS016002__bin.10	d__Bacteria;p__Fusobacteriota;c__Fusobacteriia;o__Fusobacteriales;f__Fusobacteriaceae;g__Fusobacterium;s__Fusobacterium periodonticum	4.34615e-06	2.50909e-06	1.16569e-06	4.26772e-06	1.36731e-05	2.31787e-06	1.08301e-05	0	4.85604e-06	2.29223e-06	3.6199e-06	9.8179e-07	1.68785e-06	1.43992e-06	9.78046e-07	7.06871e-07	0
113	fusobacterium	HMP_2012__SRS043663__bin.5	d__Bacteria;p__Fusobacteriota;c__Fusobacteriia;o__Fusobacteriales;f__Fusobacteriaceae;g__Fusobacterium;s__Fusobacterium periodonticum	1.62992e-06	2.49142e-06	1.68071e-06	3.35722e-06	2.00572e-06	2.15207e-06	3.12468e-06	3.04533e-07	2.72976e-06	7.33425e-07	2.25307e-06	1.37422e-06	2.22031e-06	9.24978e-07	4.29575e-07	1.62923e-07	0
114	fusobacterium	GCF_002763875.1_ASM276387v1_genomic	d__Bacteria;p__Fusobacteriota;c__Fusobacteriia;o__Fusobacteriales;f__Fusobacteriaceae;g__Fusobacterium;s__Fusobacterium periodonticum_D	1.51809e-06	2.03721e-06	9.21855e-07	3.47461e-06	3.88685e-07	8.11557e-08	5.74603e-06	0	8.19641e-07	1.98642e-07	3.53251e-06	3.43103e-07	1.13238e-06	1.38632e-07	0	8.03903e-07	0
115	fusobacterium	HMP_2012__SRS024441__bin.58	d__Bacteria;p__Fusobacteriota;c__Fusobacteriia;o__Fusobacteriales;f__Fusobacteriaceae;g__Fusobacterium;s__Fusobacterium periodonticum	7.59207e-06	1.9655e-05	5.42295e-06	1.632e-05	3.56205e-06	1.79682e-06	8.8677e-06	0	8.51077e-06	2.20169e-06	2.98983e-06	1.82684e-06	3.33495e-06	3.7968e-07	1.36664e-06	3.24158e-07	0
116	fusobacterium	HMP_2012__SRS020856__bin.44	d__Bacteria;p__Fusobacteriota;c__Fusobacteriia;o__Fusobacteriales;f__Fusobacteriaceae;g__Fusobacterium;s__	0.00013791	9.15232e-05	5.84437e-05	0.000122938	0.000216636	4.69248e-05	0.000223342	7.06947e-06	0.000145801	4.77749e-05	2.7091e-05	4.93607e-05	4.57239e-05	9.4904e-06	8.73632e-06	1.40502e-05	0
117	fusobacterium	HMP_2012__SRS024580__bin.13	d__Bacteria;p__Fusobacteriota;c__Fusobacteriia;o__Fusobacteriales;f__Fusobacteriaceae;g__Fusobacterium;s__Fusobacterium periodonticum	3.08032e-07	1.30412e-06	4.38648e-07	2.04481e-06	3.12424e-07	1.70874e-07	1.01397e-06	0	2.94525e-07	1.07987e-07	8.29404e-07	2.73845e-07	1.88873e-07	0	0	4.13236e-07	0
118	fusobacterium	HMP_2012__SRS062878__bin.31	d__Bacteria;p__Fusobacteriota;c__Fusobacteriia;o__Fusobacteriales;f__Fusobacteriaceae;g__Fusobacterium;s__Fusobacterium periodonticum	1.45547e-05	7.80629e-06	3.95063e-06	2.25016e-05	4.24244e-05	4.94271e-06	9.26472e-05	1.23812e-06	2.0227e-05	8.11192e-06	7.29201e-06	1.72563e-05	6.51328e-06	2.44846e-06	1.06469e-06	2.4469e-06	0
119	fusobacterium	HMP_2012__SRS016225__bin.41	d__Bacteria;p__Fusobacteriota;c__Fusobacteriia;o__Fusobacteriales;f__Fusobacteriaceae;g__Fusobacterium;s__Fusobacterium periodonticum	2.64096e-05	4.22588e-05	2.10826e-05	1.74915e-05	2.0779e-05	1.39007e-05	3.91457e-05	1.77296e-06	3.34432e-05	9.7881e-06	1.09437e-05	5.58596e-06	1.29535e-05	3.13748e-06	5.61795e-07	4.85427e-06	0
120	fusobacterium	HMP_2012__SRS016037__bin.14	d__Bacteria;p__Fusobacteriota;c__Fusobacteriia;o__Fusobacteriales;f__Fusobacteriaceae;g__Fusobacterium;s__Fusobacterium periodonticum	1.28773e-05	5.20749e-05	9.60865e-06	2.04314e-05	9.65452e-06	2.49157e-05	1.14402e-05	7.40793e-07	1.55938e-05	1.24561e-05	1.11986e-05	8.44279e-06	1.02359e-05	8.38601e-07	4.8583e-07	1.24015e-06	0
121	fusobacterium	HMP_2012__SRS024375__bin.4	d__Bacteria;p__Fusobacteriota;c__Fusobacteriia;o__Fusobacteriales;f__Fusobacteriaceae;g__Fusobacterium;s__Fusobacterium periodonticum	5.13066e-05	2.07945e-05	1.56058e-05	3.9567e-05	9.7196e-05	1.25821e-05	0.000105017	2.10622e-06	5.35111e-05	2.34905e-05	7.04097e-06	3.50218e-05	2.94057e-05	3.38566e-06	1.29416e-05	9.89562e-06	0
122	fusobacterium	HMP_2012__SRS052227__bin.13	d__Bacteria;p__Fusobacteriota;c__Fusobacteriia;o__Fusobacteriales;f__Fusobacteriaceae;g__Fusobacterium;s__Fusobacterium periodonticum	1.22196e-05	6.6488e-06	2.2471e-06	1.86736e-05	1.92106e-05	2.84716e-06	2.59349e-05	2.27402e-06	9.16428e-06	4.05584e-06	4.26972e-06	2.45912e-06	5.64824e-06	1.35148e-06	3.85025e-07	2.45527e-06	0
123	fusobacterium	HMP_2012__SRS013947__bin.20	d__Bacteria;p__Fusobacteriota;c__Fusobacteriia;o__Fusobacteriales;f__Fusobacteriaceae;g__Fusobacterium;s__Fusobacterium periodonticum	9.89069e-06	7.00286e-06	2.87722e-06	1.09563e-05	7.59368e-06	3.64118e-06	1.04547e-05	7.98576e-07	4.42612e-06	1.9513e-06	4.80436e-06	1.37129e-06	6.60791e-06	5.15548e-07	3.50469e-07	1.46283e-06	0
124	fusobacterium	CM_cf__CF_TNFC040IS_t3M15__bin.13	d__Bacteria;p__Fusobacteriota;c__Fusobacteriia;o__Fusobacteriales;f__Fusobacteriaceae;g__Fusobacterium;s__Fusobacterium periodonticum	1.96592e-05	1.09107e-05	4.29876e-06	3.75113e-05	7.12208e-05	9.31062e-06	4.5175e-05	2.01535e-06	2.13615e-05	6.98713e-06	5.95312e-06	1.75867e-06	7.1886e-06	1.77978e-06	7.02769e-06	6.97334e-06	0
125	fusobacterium	HMP_2012__SRS023958__bin.24	d__Bacteria;p__Fusobacteriota;c__Fusobacteriia;o__Fusobacteriales;f__Fusobacteriaceae;g__Fusobacterium;s__Fusobacterium periodonticum	5.61679e-06	2.30007e-06	1.07885e-06	2.59167e-06	2.74729e-06	8.47795e-07	8.24527e-06	0	8.22175e-06	1.33044e-06	3.53145e-06	2.63025e-07	1.71055e-06	1.89481e-07	0	6.03718e-07	0
126	fusobacterium	HMP_2012__SRS011306__bin.55	d__Bacteria;p__Fusobacteriota;c__Fusobacteriia;o__Fusobacteriales;f__Fusobacteriaceae;g__Fusobacterium;s__Fusobacterium periodonticum	2.52269e-05	9.36164e-05	2.34275e-05	1.66847e-05	9.30612e-06	2.03592e-05	1.05266e-05	1.43858e-06	1.62208e-05	9.38499e-06	1.02344e-05	7.85839e-06	1.46872e-05	1.42443e-06	6.69134e-07	3.01825e-06	0
127	fusobacterium	HMP_2012__SRS015762__bin.73	d__Bacteria;p__Fusobacteriota;c__Fusobacteriia;o__Fusobacteriales;f__Fusobacteriaceae;g__Fusobacterium;s__Fusobacterium periodonticum	1.8763e-05	1.23834e-05	1.16084e-05	3.28547e-05	4.38521e-05	1.76474e-05	4.48255e-05	2.88592e-06	3.46798e-05	3.33838e-05	1.22972e-05	8.97593e-06	3.37411e-05	6.86875e-06	8.41946e-06	3.26954e-06	0
128	fusobacterium	HMP_2012__SRS053603__bin.6	d__Bacteria;p__Fusobacteriota;c__Fusobacteriia;o__Fusobacteriales;f__Fusobacteriaceae;g__Fusobacterium;s__Fusobacterium periodonticum	6.95598e-06	2.87958e-06	4.5681e-06	2.20208e-05	2.09598e-05	1.79014e-06	2.5151e-05	0	3.63487e-06	6.09168e-06	4.08025e-06	3.19575e-06	3.33956e-06	2.93442e-07	2.70037e-07	1.19545e-07	0
129	fusobacterium	Castro-NallarE_2015__ES_114__bin.5	d__Bacteria;p__Fusobacteriota;c__Fusobacteriia;o__Fusobacteriales;f__Fusobacteriaceae;g__Fusobacterium;s__Fusobacterium periodonticum	0.000209185	6.88291e-05	6.54597e-05	0.000274551	0.000774709	0.000138757	0.000711941	1.67582e-05	0.000420025	0.00024064	7.06207e-05	0.000178388	0.000137986	2.53276e-05	4.56397e-05	4.00533e-05	0
130	fusobacterium	HMP_2012__SRS017808__bin.48	d__Bacteria;p__Fusobacteriota;c__Fusobacteriia;o__Fusobacteriales;f__Fusobacteriaceae;g__Fusobacterium;s__Fusobacterium periodonticum	2.00859e-06	2.12701e-06	1.05644e-06	2.22989e-06	4.51453e-06	4.15257e-07	3.99125e-06	4.09412e-07	5.89011e-07	8.27442e-07	1.65171e-06	6.0049e-08	1.45003e-06	1.21303e-07	0	2.5496e-07	0
131	fusobacterium	HMP_2012__SRS018357__bin.3	d__Bacteria;p__Fusobacteriota;c__Fusobacteriia;o__Fusobacteriales;f__Fusobacteriaceae;g__Fusobacterium;s__Fusobacterium periodonticum	5.28627e-06	4.34686e-06	2.37404e-06	2.76013e-06	3.91877e-06	9.20157e-07	5.09668e-06	0	1.51707e-06	1.16245e-06	1.54271e-06	6.93816e-07	1.24421e-06	5.6812e-07	1.8856e-07	0	0
132	fusobacterium	HMP_2012__SRS023926__bin.12	d__Bacteria;p__Fusobacteriota;c__Fusobacteriia;o__Fusobacteriales;f__Fusobacteriaceae;g__Fusobacterium;s__Fusobacterium periodonticum	0.000118503	3.17703e-05	5.42511e-05	0.000339938	8.90892e-05	0.000208502	0.00024715	2.99685e-05	0.000432574	9.4365e-05	0.000537266	2.10461e-05	7.53642e-05	1.21225e-05	6.84611e-06	2.05257e-05	3.459e-05
133	fusobacterium	HMP_2012__SRS021954__bin.39	d__Bacteria;p__Fusobacteriota;c__Fusobacteriia;o__Fusobacteriales;f__Fusobacteriaceae;g__Fusobacterium;s__Fusobacterium periodonticum	0.000126728	8.50135e-05	8.8131e-05	0.000283799	0.000558651	0.000217575	0.000670302	1.55838e-05	0.000406148	0.000252532	0.000186952	8.94882e-05	0.000130133	2.05247e-05	4.07044e-05	3.86345e-05	0
134	fusobacterium	HMP_2012__SRS017439__bin.41	d__Bacteria;p__Fusobacteriota;c__Fusobacteriia;o__Fusobacteriales;f__Fusobacteriaceae;g__Fusobacterium;s__	4.28445e-05	4.95743e-05	1.09046e-05	3.89635e-05	7.295e-05	2.22059e-05	0.000126886	3.23665e-06	6.76091e-05	2.22224e-05	9.45976e-06	2.35542e-05	2.13094e-05	4.95426e-06	4.84089e-05	7.41194e-06	0
135	fusobacterium	HMP_2012__SRS045127__bin.1	d__Bacteria;p__Fusobacteriota;c__Fusobacteriia;o__Fusobacteriales;f__Fusobacteriaceae;g__Fusobacterium;s__Fusobacterium periodonticum_C	5.2657e-05	0.000209763	4.59001e-05	3.30397e-05	5.5188e-06	5.55945e-05	2.17101e-05	4.77445e-06	3.92937e-05	1.45202e-05	2.30289e-05	1.69815e-05	2.25445e-05	4.98088e-06	9.35468e-06	8.35373e-06	0
136	fusobacterium	GCF_000160475.1_ASM16047v1_genomic	d__Bacteria;p__Fusobacteriota;c__Fusobacteriia;o__Fusobacteriales;f__Fusobacteriaceae;g__Fusobacterium;s__Fusobacterium periodonticum	1.17103e-05	6.82984e-06	7.88532e-06	3.01895e-06	1.59044e-05	4.67835e-07	5.63261e-06	2.04706e-07	3.67679e-06	4.16376e-05	2.55968e-06	2.70852e-06	6.03048e-06	2.26681e-06	2.415e-06	1.46188e-05	0
137	fusobacterium	S6_018.46.metabat2121.contigs	d__Bacteria;p__Fusobacteriota;c__Fusobacteriia;o__Fusobacteriales;f__Fusobacteriaceae;g__Fusobacterium;s__GCF_000235465.1	7.83481e-05	7.21953e-05	7.32459e-05	0.00025819	8.42725e-05	0.000184434	0.000232575	0	0.000227216	0.000122328	8.5653e-05	9.08121e-06	8.97251e-05	6.65617e-06	1.29063e-05	4.26525e-05	0
138	fusobacterium	GCF_000235465.1_ASM23546v1_genomic	d__Bacteria;p__Fusobacteriota;c__Fusobacteriia;o__Fusobacteriales;f__Fusobacteriaceae;g__Fusobacterium;s__Fusobacterium sp000235465	6.21637e-06	2.15403e-07	8.69021e-07	2.07324e-07	1.13273e-07	1.66647e-08	1.34126e-06	0	1.24413e-05	0	1.45589e-07	1.45482e-07	3.08932e-06	2.83347e-07	3.56929e-07	7.48649e-07	0
139	fusobacterium	ERS608583_20	d__Bacteria;p__Fusobacteriota;c__Fusobacteriia;o__Fusobacteriales;f__Fusobacteriaceae;g__Fusobacterium;s__GCF_000235465.1	2.94234e-05	6.85213e-07	8.74659e-07	3.28701e-06	1.67028e-06	7.48511e-07	1.00866e-06	0	2.10205e-05	1.31162e-06	1.53627e-07	1.47005e-06	4.41666e-06	3.15959e-07	2.67697e-07	8.95645e-07	0
140	fusobacterium	HMP_2012__SRS057355__bin.21	d__Bacteria;p__Fusobacteriota;c__Fusobacteriia;o__Fusobacteriales;f__Fusobacteriaceae;g__Fusobacterium;s__Fusobacterium periodonticum	1.66978e-05	2.48508e-05	2.00216e-05	1.0894e-05	5.06383e-06	1.72785e-05	1.58985e-05	2.76833e-06	1.31894e-05	2.46058e-05	1.14636e-05	7.50397e-06	7.57335e-06	9.01084e-07	1.03412e-06	4.17769e-06	0
141	fusobacterium	HMP_2012__SRS050669__bin.36	d__Bacteria;p__Fusobacteriota;c__Fusobacteriia;o__Fusobacteriales;f__Fusobacteriaceae;g__Fusobacterium;s__Fusobacterium periodonticum	4.23447e-06	6.21469e-05	1.58365e-06	2.24914e-06	4.14141e-07	1.05158e-06	1.04013e-06	1.65006e-07	6.13841e-07	6.61786e-07	2.22084e-06	1.5498e-06	1.89948e-06	4.6672e-07	0	1.18607e-07	0
142	fusobacterium	HMP_2012__SRS024277__bin.17	d__Bacteria;p__Fusobacteriota;c__Fusobacteriia;o__Fusobacteriales;f__Fusobacteriaceae;g__Fusobacterium;s__	1.90405e-05	9.19609e-06	7.46211e-06	2.23777e-05	3.66539e-05	1.01904e-05	2.7757e-05	1.16731e-06	1.3944e-05	1.14895e-05	7.22829e-06	3.61074e-06	6.43015e-06	1.96446e-06	6.30404e-07	4.14141e-06	0
143	fusobacterium	HMP_2012__SRS018300__bin.72	d__Bacteria;p__Fusobacteriota;c__Fusobacteriia;o__Fusobacteriales;f__Fusobacteriaceae;g__Fusobacterium;s__	1.17136e-06	3.04787e-06	1.00914e-06	3.32643e-06	4.6341e-07	2.92542e-07	7.63718e-07	3.28087e-07	1.87082e-06	1.08606e-07	1.00466e-06	1.24987e-07	9.90064e-07	2.80546e-07	3.50469e-07	0	0
144	fusobacterium	HMP_2012__SRS057692__bin.52	d__Bacteria;p__Fusobacteriota;c__Fusobacteriia;o__Fusobacteriales;f__Fusobacteriaceae;g__Fusobacterium;s__	1.78443e-05	6.18703e-06	5.3269e-06	1.74695e-05	2.76509e-05	4.81461e-06	1.4845e-05	2.04706e-07	2.25184e-05	7.6868e-06	5.26062e-06	1.79166e-05	7.32923e-06	2.25844e-06	1.70037e-06	2.05313e-06	0
145	fusobacterium	GCF_000163935.1_ASM16393v1_genomic	d__Bacteria;p__Fusobacteriota;c__Fusobacteriia;o__Fusobacteriales;f__Fusobacteriaceae;g__Fusobacterium;s__Fusobacterium periodonticum_B	1.54176e-06	3.08025e-06	1.11128e-06	2.37658e-06	3.32014e-07	3.28841e-07	1.12318e-06	0	1.00989e-06	1.16622e-07	1.03935e-06	0	1.03048e-06	3.51947e-07	1.43431e-07	3.74422e-06	0
146	fusobacterium	GCF_001455105.1_ASM145510v1_genomic	d__Bacteria;p__Fusobacteriota;c__Fusobacteriia;o__Fusobacteriales;f__Fusobacteriaceae;g__Fusobacterium;s__Fusobacterium hwasookii	1.37174e-06	3.98323e-06	2.61422e-06	9.95937e-07	1.32148e-07	0	1.8792e-07	0	1.16417e-06	1.06301e-07	1.41646e-07	0	2.7078e-07	1.39015e-07	0	6.98064e-07	0
147	fusobacterium	GCF_001455085.1_ASM145508v1_genomic	d__Bacteria;p__Fusobacteriota;c__Fusobacteriia;o__Fusobacteriales;f__Fusobacteriaceae;g__Fusobacterium;s__Fusobacterium hwasookii	7.15713e-07	4.45354e-06	3.18914e-06	6.46558e-07	0	0	2.25669e-07	0	1.75102e-07	0	8.24799e-08	0	2.39668e-07	2.06139e-07	0	1.07008e-07	0
148	fusobacterium	GCF_001455145.1_ASM145514v1_genomic	d__Bacteria;p__Fusobacteriota;c__Fusobacteriia;o__Fusobacteriales;f__Fusobacteriaceae;g__Fusobacterium;s__Fusobacterium hwasookii	9.99839e-07	4.71713e-06	2.10105e-06	1.5864e-06	1.35446e-07	1.06998e-07	1.32994e-07	0	4.74977e-07	1.8519e-07	3.7911e-07	0	3.41933e-07	1.5301e-07	0	5.42797e-07	0
149	fusobacterium	GCF_000292935.1_ASM29293v1_genomic	d__Bacteria;p__Fusobacteriota;c__Fusobacteriia;o__Fusobacteriales;f__Fusobacteriaceae;g__Fusobacterium;s__Fusobacterium hwasookii	1.0097e-06	4.17224e-06	2.03642e-06	1.20154e-06	0	4.735e-08	2.16698e-07	0	4.65014e-07	1.29259e-07	4.03404e-07	0	1.96802e-07	3.88019e-08	0	1.92072e-06	0
150	fusobacterium	HMP_2012__SRS019073__bin.24	d__Bacteria;p__Fusobacteriota;c__Fusobacteriia;o__Fusobacteriales;f__Fusobacteriaceae;g__Fusobacterium;s__	3.61968e-05	9.70509e-06	1.12785e-05	2.33752e-05	0.000101532	9.31869e-06	8.04956e-05	1.67493e-06	3.31932e-05	6.39095e-06	1.07869e-05	4.74048e-05	2.03331e-05	1.77298e-05	1.40897e-05	2.51135e-05	0
151	fusobacterium	GCF_002591475.1_ASM259147v1_genomic	d__Bacteria;p__Fusobacteriota;c__Fusobacteriia;o__Fusobacteriales;f__Fusobacteriaceae;g__Fusobacterium;s__Fusobacterium polymorphum	1.28295e-06	3.13246e-06	2.42497e-06	3.08393e-06	1.15898e-07	2.73388e-07	3.36286e-07	0	1.01647e-06	1.22267e-07	3.56344e-07	0	2.53216e-07	5.43371e-08	0	3.58735e-07	0
152	fusobacterium	HMP_2012__SRS065099__bin.53	d__Bacteria;p__Fusobacteriota;c__Fusobacteriia;o__Fusobacteriales;f__Fusobacteriaceae;g__Fusobacterium;s__Fusobacterium nucleatum_A	1.61898e-06	3.39365e-06	2.13692e-06	4.18731e-06	2.47226e-07	7.08613e-07	1.17838e-06	1.64043e-07	2.02876e-06	1.28308e-07	1.06364e-06	4.26562e-07	3.26337e-07	2.5533e-07	0	1.02201e-06	0
153	fusobacterium	HMP_2012__SRS016043__bin.3	d__Bacteria;p__Fusobacteriota;c__Fusobacteriia;o__Fusobacteriales;f__Fusobacteriaceae;g__Fusobacterium;s__Fusobacterium nucleatum_B	0.000156929	0.000586655	0.000155111	8.55465e-05	8.36304e-05	0.000161305	0.000159077	2.65966e-05	0.000184053	4.22077e-05	5.37749e-05	5.95186e-05	8.91643e-05	1.54486e-05	3.43598e-06	1.8013e-05	0
154	fusobacterium	GCF_002211625.1_ASM221162v1_genomic	d__Bacteria;p__Fusobacteriota;c__Fusobacteriia;o__Fusobacteriales;f__Fusobacteriaceae;g__Fusobacterium;s__Fusobacterium polymorphum	1.6789e-06	5.27072e-06	3.11455e-06	5.27816e-06	0	3.33293e-08	5.39677e-07	0	1.8789e-06	3.96634e-07	3.74935e-07	1.21702e-07	1.42808e-07	2.94831e-07	0	5.04091e-07	0
155	fusobacterium	GCF_001433955.1_ASM143395v1_genomic	d__Bacteria;p__Fusobacteriota;c__Fusobacteriia;o__Fusobacteriales;f__Fusobacteriaceae;g__Fusobacterium;s__Fusobacterium polymorphum	1.70798e-06	1.48969e-06	1.90893e-06	2.11281e-06	9.00932e-08	2.66402e-07	2.94625e-06	2.43983e-06	9.50701e-07	4.47756e-07	7.56949e-07	9.18359e-07	4.45853e-07	1.98238e-06	0	4.39784e-07	0
156	fusobacterium	GCF_000523555.1_Fuso_nucl_13_3C_V1_genomic	d__Bacteria;p__Fusobacteriota;c__Fusobacteriia;o__Fusobacteriales;f__Fusobacteriaceae;g__Fusobacterium;s__Fusobacterium polymorphum	1.82406e-06	1.30668e-05	3.74033e-06	2.04824e-06	1.48154e-07	3.91674e-08	8.04382e-07	0	1.03075e-06	2.6967e-07	1.28491e-06	3.32733e-07	2.32841e-07	9.38981e-08	0	4.29723e-07	0
157	fusobacterium	GCF_000479185.1_Fuso_nucl_CTI-6_V1_genomic	d__Bacteria;p__Fusobacteriota;c__Fusobacteriia;o__Fusobacteriales;f__Fusobacteriaceae;g__Fusobacterium;s__Fusobacterium polymorphum	1.51466e-06	5.15474e-06	3.86223e-06	2.51078e-06	3.68992e-08	9.93856e-08	4.594e-07	0	4.00982e-06	8.47796e-08	1.01439e-06	7.13285e-07	4.72331e-07	1.82382e-07	0	1.29782e-06	0
158	fusobacterium	GCF_002202115.1_ASM220211v1_genomic	d__Bacteria;p__Fusobacteriota;c__Fusobacteriia;o__Fusobacteriales;f__Fusobacteriaceae;g__Fusobacterium;s__Fusobacterium polymorphum	1.88367e-06	9.75421e-06	9.18442e-06	2.2936e-06	7.65261e-08	8.29111e-08	8.1179e-07	0	8.6338e-07	3.00584e-07	7.46109e-07	9.31433e-07	2.06652e-07	1.92917e-07	0	2.98415e-07	0
159	fusobacterium	HMP_2012__SRS016541__bin.1	d__Bacteria;p__Fusobacteriota;c__Fusobacteriia;o__Fusobacteriales;f__Fusobacteriaceae;g__Fusobacterium;s__Fusobacterium polymorphum	0.000379467	0.000773568	0.000576553	0.00118996	2.20658e-05	0.000856713	0.000213685	7.77091e-05	0.00085792	0.000112025	0.000341663	0.000387414	0.00333958	0.000550232	1.4304e-05	0.00050175	0
160	fusobacterium	GCF_003226385.1_ASM322638v1_genomic	d__Bacteria;p__Fusobacteriota;c__Fusobacteriia;o__Fusobacteriales;f__Fusobacteriaceae;g__Fusobacterium;s__Fusobacterium polymorphum	1.73812e-06	2.75024e-06	2.20868e-06	2.56856e-06	4.81083e-07	2.31817e-07	1.33248e-06	0	6.02981e-07	1.48535e-07	8.63965e-07	2.06652e-06	2.43275e-07	1.41073e-07	0	0	0
161	fusobacterium	GCF_001457555.1_NCTC10562_genomic	d__Bacteria;p__Fusobacteriota;c__Fusobacteriia;o__Fusobacteriales;f__Fusobacteriaceae;g__Fusobacterium;s__Fusobacterium polymorphum	1.39574e-06	1.59875e-06	1.7969e-06	2.39443e-06	1.02117e-07	2.17913e-08	6.23675e-07	0	5.77967e-07	7.36509e-08	7.20354e-07	1.04163e-06	2.51021e-07	6.00096e-08	0	9.7979e-07	0
162	fusobacterium	GCF_002591465.1_ASM259146v1_genomic	d__Bacteria;p__Fusobacteriota;c__Fusobacteriia;o__Fusobacteriales;f__Fusobacteriaceae;g__Fusobacterium;s__Fusobacterium polymorphum	5.42754e-06	1.80687e-06	1.93177e-06	1.66128e-06	2.54053e-07	2.48733e-07	1.04249e-06	0	6.98558e-07	3.46965e-07	6.79864e-07	1.07158e-07	2.16028e-07	1.27425e-08	0	3.46151e-07	0
163	fusobacterium	GCF_001815715.1_ASM181571v1_genomic	d__Bacteria;p__Fusobacteriota;c__Fusobacteriia;o__Fusobacteriales;f__Fusobacteriaceae;g__Fusobacterium;s__Fusobacterium polymorphum	1.89572e-06	3.21076e-06	2.60819e-06	2.11251e-06	6.58564e-08	1.8833e-07	8.53687e-07	0	7.9944e-07	1.11227e-07	1.02054e-06	1.70816e-06	2.25673e-07	9.53674e-08	0	1.02947e-07	0
164	fusobacterium	HMP_2012__SRS051930__bin.28	d__Bacteria;p__Fusobacteriota;c__Fusobacteriia;o__Fusobacteriales;f__Fusobacteriaceae;g__Fusobacterium;s__Fusobacterium nucleatum_B	1.60526e-06	9.07955e-07	1.43018e-06	4.70363e-06	6.6194e-07	1.85633e-08	7.3621e-07	0	5.96218e-07	6.42653e-07	4.69968e-07	2.31473e-07	2.31001e-07	2.18682e-07	0	5.60191e-07	0
165	fusobacterium	GCF_000524235.1_FspOBRC1v1.0_genomic	d__Bacteria;p__Fusobacteriota;c__Fusobacteriia;o__Fusobacteriales;f__Fusobacteriaceae;g__Fusobacterium;s__Fusobacterium polymorphum	1.69863e-06	2.32407e-06	2.29624e-06	7.37385e-06	1.83154e-07	1.01124e-07	4.99199e-07	0	9.12786e-07	2.07191e-07	6.25822e-07	7.15117e-07	2.33441e-07	1.59012e-07	0	1.13243e-06	0
166	fusobacterium	HMP_2012__SRS075410__bin.36	d__Bacteria;p__Fusobacteriota;c__Fusobacteriia;o__Fusobacteriales;f__Fusobacteriaceae;g__Fusobacterium;s__GCF_000524395.1	3.7128e-06	5.46175e-06	2.33431e-06	2.31611e-05	5.65491e-06	1.00708e-06	5.48489e-06	6.56173e-07	4.55955e-06	1.02635e-06	1.86832e-06	5.74065e-07	3.65905e-06	2.85933e-07	0	1.21103e-06	0
167	fusobacterium	GCF_000524395.1_FspCM22v1.0_genomic	d__Bacteria;p__Fusobacteriota;c__Fusobacteriia;o__Fusobacteriales;f__Fusobacteriaceae;g__Fusobacterium;s__Fusobacterium polymorphum	8.85679e-07	3.36596e-06	1.35673e-06	3.41761e-06	2.17779e-07	4.40933e-08	2.95329e-07	0	1.4631e-07	1.31939e-07	3.67386e-07	3.50866e-07	2.36876e-07	0	0	1.23931e-06	0
168	fusobacterium	HMP_2012__SRS011343__bin.54	d__Bacteria;p__Fusobacteriota;c__Fusobacteriia;o__Fusobacteriales;f__Fusobacteriaceae;g__Fusobacterium;s__	6.86779e-06	1.68541e-05	3.16236e-06	1.44847e-05	1.44277e-05	8.20654e-06	3.28454e-05	1.11667e-06	2.94916e-05	3.67057e-06	5.22564e-06	1.70168e-06	1.51612e-06	6.76917e-07	0	5.80993e-07	0
169	fusobacterium	GCF_002591585.1_ASM259158v1_genomic	d__Bacteria;p__Fusobacteriota;c__Fusobacteriia;o__Fusobacteriales;f__Fusobacteriaceae;g__Fusobacterium;s__Fusobacterium polymorphum	5.39292e-07	2.06088e-06	7.09361e-07	2.95062e-06	1.56167e-07	1.66647e-08	1.84735e-07	0	5.90098e-07	0	2.50698e-07	0	1.77741e-07	0	0	2.27414e-07	0
170	fusobacterium	GCF_002573625.1_ASM257362v1_genomic	d__Bacteria;p__Fusobacteriota;c__Fusobacteriia;o__Fusobacteriales;f__Fusobacteriaceae;g__Fusobacterium;s__Fusobacterium nucleatum_D	8.26315e-07	2.86208e-06	2.75297e-06	4.04161e-06	1.31221e-07	5.21667e-08	5.68805e-08	0	1.26607e-06	7.36509e-08	3.89629e-07	4.70336e-07	4.88776e-07	1.36527e-07	0	4.06974e-07	0
171	fusobacterium	GCF_002761915.1_ASM276191v1_genomic	d__Bacteria;p__Fusobacteriota;c__Fusobacteriia;o__Fusobacteriales;f__Fusobacteriaceae;g__Fusobacterium;s__Fusobacterium polymorphum	2.72303e-07	1.33344e-06	7.549e-07	1.03442e-06	9.95305e-08	0	0	0	0	3.09345e-08	9.26752e-08	0	5.25683e-08	8.94536e-08	0	0	0
172	fusobacterium	GCF_002591505.1_ASM259150v1_genomic	d__Bacteria;p__Fusobacteriota;c__Fusobacteriia;o__Fusobacteriales;f__Fusobacteriaceae;g__Fusobacterium;s__Fusobacterium polymorphum	7.63964e-07	2.50772e-06	3.66911e-07	1.40869e-06	2.02462e-07	0	1.72614e-07	0	5.18061e-08	6.46706e-08	7.34633e-08	0	1.27939e-07	8.14521e-08	0	0	0
173	fusobacterium	CM_periimplantitis__SP_189SPI_T016__bin.8	d__Bacteria;p__Fusobacteriota;c__Fusobacteriia;o__Fusobacteriales;f__Fusobacteriaceae;g__Fusobacterium;s__GCF_000524395.1	9.9011e-06	7.16958e-06	3.58128e-06	1.26687e-05	9.15897e-06	3.37714e-06	1.58979e-05	7.40793e-07	1.68372e-05	2.38824e-06	2.57121e-06	1.26862e-06	4.15535e-06	9.11433e-07	4.82029e-07	8.46404e-06	0
174	fusobacterium	HMP_2012__SRS050628__bin.23	d__Bacteria;p__Fusobacteriota;c__Fusobacteriia;o__Fusobacteriales;f__Fusobacteriaceae;g__Fusobacterium;s__GCF_000524395.1	4.96298e-06	8.56923e-06	2.87907e-06	7.35069e-06	7.5583e-06	2.22763e-06	6.52342e-06	1.43024e-06	5.25582e-06	1.4253e-06	1.47924e-06	3.44901e-07	1.78807e-06	4.23714e-07	1.79065e-07	2.97665e-07	0
175	fusobacterium	GCF_002591555.1_ASM259155v1_genomic	d__Bacteria;p__Fusobacteriota;c__Fusobacteriia;o__Fusobacteriales;f__Fusobacteriaceae;g__Fusobacterium;s__Fusobacterium polymorphum	1.44931e-06	5.24741e-06	3.28203e-06	4.44478e-06	2.8812e-07	6.75227e-08	8.35905e-07	0	7.50101e-07	1.98914e-08	6.45426e-07	2.14316e-07	5.72511e-07	1.36291e-07	0	1.91597e-07	0
176	fusobacterium	GCF_002204435.1_ASM220443v1_genomic	d__Bacteria;p__Fusobacteriota;c__Fusobacteriia;o__Fusobacteriales;f__Fusobacteriaceae;g__Fusobacterium;s__Fusobacterium polymorphum	1.13714e-05	1.32523e-05	1.04911e-05	1.29848e-05	2.82725e-05	1.04402e-06	2.88019e-05	3.72994e-07	3.22229e-06	5.09907e-06	6.37393e-06	7.72952e-05	6.42513e-05	2.94351e-06	1.33543e-06	3.90101e-06	0
177	fusobacterium	GCF_002591645.1_ASM259164v1_genomic	d__Bacteria;p__Fusobacteriota;c__Fusobacteriia;o__Fusobacteriales;f__Fusobacteriaceae;g__Fusobacterium;s__Fusobacterium polymorphum	9.75404e-07	3.77679e-06	1.33034e-06	5.22876e-06	0	4.59525e-07	4.9312e-07	0	2.02443e-07	6.30516e-08	3.88364e-07	2.14316e-07	1.66689e-07	1.96344e-07	0	2.91768e-07	0
178	fusobacterium	GCF_002591545.1_ASM259154v1_genomic	d__Bacteria;p__Fusobacteriota;c__Fusobacteriia;o__Fusobacteriales;f__Fusobacteriaceae;g__Fusobacterium;s__Fusobacterium polymorphum	5.14901e-07	2.74063e-06	1.28024e-06	2.69712e-06	1.13273e-07	3.33293e-08	2.14752e-07	0	2.6244e-07	1.11408e-07	2.80178e-07	4.68486e-07	1.34164e-07	1.03974e-07	0	1.01744e-07	0
179	fusobacterium	GCF_002591515.1_ASM259151v1_genomic	d__Bacteria;p__Fusobacteriota;c__Fusobacteriia;o__Fusobacteriales;f__Fusobacteriaceae;g__Fusobacterium;s__Fusobacterium polymorphum	8.79624e-07	1.62551e-06	1.02287e-06	1.59671e-06	6.33808e-08	1.37921e-07	1.01046e-07	0	1.32826e-07	3.09345e-08	2.21538e-07	3.54593e-06	1.41473e-07	2.81486e-08	0	8.39372e-07	0
180	fusobacterium	GCF_002243405.1_ASM224340v1_genomic	d__Bacteria;p__Fusobacteriota;c__Fusobacteriia;o__Fusobacteriales;f__Fusobacteriaceae;g__Fusobacterium;s__Fusobacterium nucleatum	2.01233e-06	6.60033e-07	9.13131e-07	3.03315e-06	1.41719e-06	2.08458e-07	1.16797e-06	0	4.13633e-07	9.46831e-08	4.81688e-07	3.03638e-07	6.61215e-07	5.78046e-07	0	5.9115e-07	0
181	fusobacterium	CM_periimplantitis__SP_125SPI_T016__bin.3	d__Bacteria;p__Fusobacteriota;c__Fusobacteriia;o__Fusobacteriales;f__Fusobacteriaceae;g__Fusobacterium;s__GCF_002243405.1	1.51184e-06	4.75566e-07	3.06631e-07	2.68687e-06	7.40559e-07	1.11818e-07	6.07892e-07	0	5.8922e-07	2.25128e-07	5.03506e-07	1.44255e-07	4.72646e-07	4.09137e-07	0	7.59976e-07	0
182	fusobacterium	CM_periimplantitis__SP_305SPI_T016__bin.16	d__Bacteria;p__Fusobacteriota;c__Fusobacteriia;o__Fusobacteriales;f__Fusobacteriaceae;g__Fusobacterium;s__Fusobacterium nucleatum	8.65655e-06	2.63464e-06	2.1469e-06	1.90383e-05	3.42457e-06	2.41943e-06	7.8621e-06	0	2.37087e-05	4.15229e-06	1.83822e-06	7.36633e-07	1.81973e-06	2.8771e-07	3.49694e-06	2.00382e-06	0
183	fusobacterium	GCF_003019785.1_ASM301978v1_genomic	d__Bacteria;p__Fusobacteriota;c__Fusobacteriia;o__Fusobacteriales;f__Fusobacteriaceae;g__Fusobacterium;s__Fusobacterium nucleatum	1.14244e-05	3.58325e-06	2.95564e-06	3.01494e-05	3.409e-06	1.576e-06	8.98813e-06	0	1.23619e-05	2.23252e-06	2.42188e-06	5.84529e-07	6.64565e-06	7.63508e-07	3.0521e-06	3.06649e-06	0
184	fusobacterium	GCF_002211605.1_ASM221160v1_genomic	d__Bacteria;p__Fusobacteriota;c__Fusobacteriia;o__Fusobacteriales;f__Fusobacteriaceae;g__Fusobacterium;s__Fusobacterium nucleatum	6.26881e-07	2.87269e-06	1.27794e-06	7.50551e-07	1.85671e-07	2.65011e-06	5.43362e-07	0	8.93672e-07	1.42826e-06	9.16507e-08	0	1.81481e-06	2.43665e-07	0	6.10461e-07	0
185	fusobacterium	GCF_000479265.1_Fuso_nucl_CTI-2_V1_genomic	d__Bacteria;p__Fusobacteriota;c__Fusobacteriia;o__Fusobacteriales;f__Fusobacteriaceae;g__Fusobacterium;s__Fusobacterium nucleatum	7.8893e-07	8.77426e-08	1.97605e-07	9.7889e-07	2.89577e-07	7.71324e-08	3.46348e-07	0	4.78813e-07	1.55e-07	1.06748e-07	0	5.06549e-08	7.17566e-08	0	2.03487e-07	0
186	fusobacterium	GCF_003019295.1_ASM301929v1_genomic	d__Bacteria;p__Fusobacteriota;c__Fusobacteriia;o__Fusobacteriales;f__Fusobacteriaceae;g__Fusobacterium;s__Fusobacterium nucleatum	3.56141e-07	3.5024e-07	3.22932e-07	3.01596e-07	9.53511e-08	0	1.98373e-07	0	1.64482e-07	0	1.59814e-08	0	2.95358e-07	0	0	1.24708e-07	0
187	fusobacterium	GCA_001296185.1_ASM129618v1_genomic	d__Bacteria;p__Fusobacteriota;c__Fusobacteriia;o__Fusobacteriales;f__Fusobacteriaceae;g__Fusobacterium;s__Fusobacterium nucleatum	1.11537e-06	6.38438e-07	1.56236e-06	1.60072e-06	2.0606e-07	5.21667e-08	5.18736e-07	0	8.88807e-07	7.96277e-08	1.51919e-07	0	1.67532e-07	1.47555e-06	0	6.08326e-07	0
188	fusobacterium	CM_periimplantitis__SP_163SPI_T016__bin.2	d__Bacteria;p__Fusobacteriota;c__Fusobacteriia;o__Fusobacteriales;f__Fusobacteriaceae;g__Fusobacterium;s__Fusobacterium nucleatum_H	1.46864e-05	3.85871e-06	2.91225e-06	2.13572e-05	3.01945e-05	3.41795e-06	2.43438e-05	5.09738e-06	1.40809e-05	9.35579e-06	4.36675e-06	6.71624e-06	1.2261e-06	2.3944e-06	5.84844e-07	5.53463e-07	0
189	fusobacterium	GCF_002764055.1_ASM276405v1_genomic	d__Bacteria;p__Fusobacteriota;c__Fusobacteriia;o__Fusobacteriales;f__Fusobacteriaceae;g__Fusobacterium;s__Fusobacterium vincentii	6.80072e-06	5.63859e-06	3.53204e-06	2.68044e-05	3.18212e-06	2.64533e-06	1.36005e-06	0	8.4191e-06	2.34541e-06	3.93471e-07	0	3.32566e-07	2.4256e-07	0	5.32645e-07	0
190	fusobacterium	GCF_001810995.1_ASM181099v1_genomic	d__Bacteria;p__Fusobacteriota;c__Fusobacteriia;o__Fusobacteriales;f__Fusobacteriaceae;g__Fusobacterium;s__Fusobacterium vincentii	2.65966e-06	1.27181e-06	8.06851e-07	6.15967e-06	2.92636e-07	0	2.76221e-07	0	8.41634e-07	1.29383e-07	2.2798e-07	1.18933e-06	1.83256e-07	3.46581e-08	0	8.13949e-07	0
191	fusobacterium	GCA_000182945.1_ASM18294v1_genomic	d__Bacteria;p__Fusobacteriota;c__Fusobacteriia;o__Fusobacteriales;f__Fusobacteriaceae;g__Fusobacterium;s__Fusobacterium vincentii	1.09339e-05	1.48133e-05	5.30245e-06	1.63949e-05	7.27415e-06	2.34568e-07	1.07307e-05	1.65006e-07	3.96105e-06	1.3694e-05	5.43508e-06	4.84327e-06	8.43084e-06	1.16729e-06	6.18175e-07	6.0098e-06	0
192	fusobacterium	GCF_000162235.2_ASM16223v2_genomic	d__Bacteria;p__Fusobacteriota;c__Fusobacteriia;o__Fusobacteriales;f__Fusobacteriaceae;g__Fusobacterium;s__Fusobacterium vincentii	5.73273e-06	1.94872e-06	1.43397e-06	1.70971e-05	1.38929e-06	4.97861e-07	1.89532e-06	3.28087e-07	1.4534e-06	3.88735e-07	8.0464e-07	4.68486e-07	3.90834e-07	2.49811e-07	2.41014e-07	1.06029e-06	0
193	fusobacterium	GCF_000163915.2_ASM16391v2_genomic	d__Bacteria;p__Fusobacteriota;c__Fusobacteriia;o__Fusobacteriales;f__Fusobacteriaceae;g__Fusobacterium;s__Fusobacterium vincentii	5.41824e-06	1.07849e-06	1.47157e-06	1.2021e-05	4.73715e-07	2.17943e-07	1.24899e-06	0	4.55984e-07	1.26744e-07	5.52872e-07	2.31473e-07	2.88772e-07	8.3446e-08	0	6.66233e-07	0
194	fusobacterium	GCF_000479205.1_Fuso_nucl_CTI-7_V1_genomic	d__Bacteria;p__Fusobacteriota;c__Fusobacteriia;o__Fusobacteriales;f__Fusobacteriaceae;g__Fusobacterium;s__Fusobacterium vincentii	9.65594e-06	1.05897e-06	1.85154e-06	2.10048e-05	4.41632e-06	2.83118e-07	1.61064e-06	0	1.01161e-06	2.16926e-07	1.93057e-06	7.80065e-07	1.68688e-07	7.33607e-07	4.82029e-07	1.27934e-06	0
195	fusobacterium	HMP_2012__SRS014477__bin.8	d__Bacteria;p__Fusobacteriota;c__Fusobacteriia;o__Fusobacteriales;f__Fusobacteriaceae;g__Fusobacterium;s__Fusobacterium nucleatum_I	4.9216e-05	2.53023e-05	1.50934e-05	5.62062e-05	0.000100323	1.98115e-05	7.2897e-05	6.73639e-06	4.19117e-05	2.61657e-05	1.31087e-05	3.82331e-05	3.66159e-05	1.28399e-05	8.00693e-06	1.19805e-06	0
196	fusobacterium	GCF_002749995.1_ASM274999v1_genomic	d__Bacteria;p__Fusobacteriota;c__Fusobacteriia;o__Fusobacteriales;f__Fusobacteriaceae;g__Fusobacterium;s__Fusobacterium vincentii	2.53964e-05	7.58683e-06	4.64822e-06	1.88372e-05	1.30425e-05	1.67314e-06	1.13194e-05	5.9387e-07	1.11122e-05	4.19228e-06	1.44554e-06	3.31707e-06	2.16465e-06	1.32811e-06	2.45545e-06	1.09065e-06	0
197	fusobacterium	GCF_000158255.2_Fuso_sp_4_1_13_V2_genomic	d__Bacteria;p__Fusobacteriota;c__Fusobacteriia;o__Fusobacteriales;f__Fusobacteriaceae;g__Fusobacterium;s__Fusobacterium vincentii	4.24205e-06	1.32028e-06	2.05806e-06	1.64256e-05	1.29542e-06	1.81455e-07	4.94581e-07	0	1.71496e-06	1.94059e-07	6.44728e-07	2.61219e-07	2.43678e-07	9.9321e-08	0	6.91114e-07	0
198	fusobacterium	S5_031.27.metabat2121.contigs	d__Bacteria;p__Fusobacteriota;c__Fusobacteriia;o__Fusobacteriales;f__Fusobacteriaceae;g__Fusobacterium;s__Fusobacterium nucleatum_E	0.000190009	2.05233e-05	5.51565e-05	0.000146657	9.84256e-05	3.5078e-05	0.000103838	9.6018e-06	0.000104497	9.61532e-05	1.5616e-05	9.95217e-05	2.67633e-05	7.62962e-06	9.70626e-05	0.000241811	0
199	fusobacterium	GCF_000493815.1_FN_W1481_genomic	d__Bacteria;p__Fusobacteriota;c__Fusobacteriia;o__Fusobacteriales;f__Fusobacteriaceae;g__Fusobacterium;s__Fusobacterium nucleatum_E	7.26314e-05	6.90568e-05	0.000101608	8.40021e-05	5.75371e-05	0.000111869	0.000207736	2.81338e-05	0.000103704	0.00019168	1.48279e-05	0.000105559	7.24049e-05	5.36318e-05	0.00024885	0.000263526	0.00210752
200	fusobacterium	HMP_2012__SRS015061__bin.8	d__Bacteria;p__Fusobacteriota;c__Fusobacteriia;o__Fusobacteriales;f__Fusobacteriaceae;g__Fusobacterium;s__	2.95214e-05	1.70144e-05	1.66413e-05	2.81597e-05	1.39115e-05	6.8326e-06	2.18636e-05	0	3.33036e-05	5.4104e-06	4.21957e-06	3.66163e-06	8.0399e-06	4.60416e-06	1.01198e-07	5.31905e-06	0
201	fusobacterium	CM_periimplantitis__SP_264SPI_T016__bin.4	d__Bacteria;p__Fusobacteriota;c__Fusobacteriia;o__Fusobacteriales;f__Fusobacteriaceae;g__Fusobacterium;s__	1.35535e-05	8.83202e-06	7.21889e-06	1.04652e-05	9.27734e-07	8.15828e-08	2.46962e-06	0	4.70119e-06	4.40689e-07	8.32063e-07	2.29164e-07	2.51382e-06	1.25712e-06	0	5.08718e-07	0
202	fusobacterium	CM_periimplantitis__SP_285SPI_T016__bin.7	d__Bacteria;p__Fusobacteriota;c__Fusobacteriia;o__Fusobacteriales;f__Fusobacteriaceae;g__Fusobacterium;s__Fusobacterium animalis	4.05947e-06	2.64372e-06	3.96019e-06	1.15489e-05	3.74226e-06	3.79438e-07	3.53595e-06	1.24331e-07	8.42572e-06	9.19891e-07	8.15254e-07	1.45398e-06	6.33896e-07	9.843e-07	0	2.20258e-06	0
203	fusobacterium	GCF_000234075.2_Fuso_nucl_F0401_V2_genomic	d__Bacteria;p__Fusobacteriota;c__Fusobacteriia;o__Fusobacteriales;f__Fusobacteriaceae;g__Fusobacterium;s__Fusobacterium animalis	4.78688e-06	2.58822e-06	4.26523e-06	4.9042e-06	4.88968e-06	4.55992e-07	1.71057e-06	4.56799e-07	6.7704e-06	1.66926e-06	1.13929e-06	1.4683e-06	3.15564e-06	8.8997e-07	0	1.11324e-06	0
204	fusobacterium	NielsenHB_2014__V1_CD35_1__bin.24	d__Bacteria;p__Fusobacteriota;c__Fusobacteriia;o__Fusobacteriales;f__Fusobacteriaceae;g__Fusobacterium;s__Fusobacterium animalis	0.000384767	0.000602165	0.000672165	0.000606588	7.90011e-05	9.39163e-05	0.000107066	2.56351e-05	0.00212618	0.000104889	2.45599e-05	5.50545e-05	3.05028e-05	8.0451e-06	1.63021e-06	8.52176e-05	0
205	fusobacterium	GCA_002884895.1_ASM288489v1_genomic	d__Bacteria;p__Fusobacteriota;c__Fusobacteriia;o__Fusobacteriales;f__Fusobacteriaceae;g__Fusobacterium;s__Fusobacterium animalis	1.31063e-05	1.54795e-06	2.17824e-06	8.00151e-06	7.5601e-07	4.57487e-07	1.58053e-06	0	1.59266e-05	1.38717e-06	6.12307e-07	1.66114e-06	4.03027e-07	4.29545e-07	4.82029e-07	4.09036e-06	0
206	fusobacterium	NielsenHB_2014__V1_CD18_3__bin.16	d__Bacteria;p__Fusobacteriota;c__Fusobacteriia;o__Fusobacteriales;f__Fusobacteriaceae;g__Fusobacterium;s__Fusobacterium animalis	0.000338292	0.000133988	0.000199965	0.000717087	0.00138184	0.000317229	0.000767534	0.000132591	0.0010738	0.000683703	0.000243903	7.76841e-05	0.000142965	3.57299e-05	8.37435e-05	8.15298e-05	0
207	fusobacterium	GCF_001296085.1_ASM129608v1_genomic	d__Bacteria;p__Fusobacteriota;c__Fusobacteriia;o__Fusobacteriales;f__Fusobacteriaceae;g__Fusobacterium;s__Fusobacterium animalis	4.56497e-06	4.50622e-06	4.79597e-06	8.52406e-06	7.65034e-07	2.94588e-07	1.13999e-06	0	7.46708e-06	7.65638e-07	9.2497e-07	1.5464e-06	3.53725e-07	1.28933e-06	0	2.7944e-06	0
208	fusobacterium	GCA_002762005.1_ASM276200v1_genomic	d__Bacteria;p__Fusobacteriota;c__Fusobacteriia;o__Fusobacteriales;f__Fusobacteriaceae;g__Fusobacterium;s__Fusobacterium animalis	5.0811e-06	1.1336e-06	2.6292e-06	5.82851e-06	3.7172e-07	2.38414e-08	1.23555e-06	0	7.81005e-06	4.27081e-07	4.95668e-07	6.77574e-07	2.26703e-07	3.61956e-07	0	2.14952e-06	0
209	fusobacterium	GCF_000524215.1_FspCM1v1.0_genomic	d__Bacteria;p__Fusobacteriota;c__Fusobacteriia;o__Fusobacteriales;f__Fusobacteriaceae;g__Fusobacterium;s__Fusobacterium animalis	3.28317e-06	2.93901e-06	3.19896e-06	5.52231e-06	3.77505e-07	1.85686e-07	2.20076e-06	0	3.03889e-05	8.81877e-07	5.70249e-07	3.76956e-07	2.58461e-07	1.38048e-06	0	2.08634e-06	0
210	fusobacterium	ERR209715_bin.6	d__Bacteria;p__Fusobacteriota;c__Fusobacteriia;o__Fusobacteriales;f__Fusobacteriaceae;g__Fusobacterium;s__Fusobacterium animalis	0.000160399	0.000301875	0.000207758	0.000423396	0.000797384	0.000562771	0.000459646	0.000185608	0.000497229	0.00034256	0.000374653	9.96931e-05	0.00018541	9.25127e-05	4.88412e-05	2.82772e-05	0
211	fusobacterium	CM_periimplantitis__SP_387SPT_T016__bin.21	d__Bacteria;p__Fusobacteriota;c__Fusobacteriia;o__Fusobacteriales;f__Fusobacteriaceae;g__Fusobacterium;s__Fusobacterium animalis	1.7851e-05	6.38295e-06	9.04787e-06	4.89592e-05	4.16678e-05	8.85564e-06	8.0888e-05	1.51486e-06	5.6453e-05	3.06461e-05	9.199e-06	1.22934e-05	9.35499e-06	5.62816e-06	2.22595e-06	4.9417e-06	0
212	fusobacterium	GCF_000400875.1_ASM40087v1_genomic	d__Bacteria;p__Fusobacteriota;c__Fusobacteriia;o__Fusobacteriales;f__Fusobacteriaceae;g__Fusobacterium;s__Fusobacterium animalis	3.47975e-06	6.86866e-07	1.89527e-06	5.02046e-06	4.75498e-07	1.40181e-07	5.79848e-07	0	2.11011e-05	7.83334e-07	5.83273e-07	9.21052e-07	1.80009e-07	1.39869e-06	0	1.42441e-06	0
213	fusobacterium	GCF_000242975.1_Fuso_nucl_OT_420_V1_genomic	d__Bacteria;p__Fusobacteriota;c__Fusobacteriia;o__Fusobacteriales;f__Fusobacteriaceae;g__Fusobacterium;s__Fusobacterium animalis	3.70005e-06	1.87944e-06	2.97889e-06	6.28635e-06	2.38985e-07	2.77869e-07	9.06496e-07	0	1.0154e-05	9.8512e-07	5.4438e-07	8.97741e-07	2.61217e-07	6.41506e-07	2.71015e-07	2.16054e-06	0
214	fusobacterium	ERR1620272_bin.11	d__Bacteria;p__Fusobacteriota;c__Fusobacteriia;o__Fusobacteriales;f__Fusobacteriaceae;g__Fusobacterium;s__Fusobacterium animalis	0.00688886	0.00485793	0.00381044	0.0015774	0.000282941	0.000277928	0.000452566	2.53324e-05	0.000972873	0.000115592	0.0007639	0.00016304	0.000373213	3.98576e-05	8.24554e-05	6.57457e-06	0
215	fusobacterium	S5_030.23.metabat2121.contigs	d__Bacteria;p__Fusobacteriota;c__Fusobacteriia;o__Fusobacteriales;f__Fusobacteriaceae;g__Fusobacterium;s__Fusobacterium animalis	0.000118717	0.000177149	1.68536e-05	4.95836e-06	1.06944e-06	6.59453e-07	2.84895e-06	0	1.03e-05	1.66187e-06	1.30668e-06	2.27713e-06	5.15341e-07	1.12508e-06	0	2.435e-06	0
216	fusobacterium	GCF_001813745.1_ASM181374v1_genomic	d__Bacteria;p__Fusobacteriota;c__Fusobacteriia;o__Fusobacteriales;f__Fusobacteriaceae;g__Fusobacterium;s__Fusobacterium animalis	2.11608e-06	8.48057e-07	8.3593e-07	1.86154e-06	3.35563e-07	5.92574e-07	6.58234e-06	8.70319e-07	2.35905e-06	3.69509e-07	3.14831e-07	0	2.53173e-07	8.0186e-05	7.87781e-07	5.98309e-05	0
217	fusobacterium	GCF_000218655.1_Fusobacterium_sp_11_3_2_V1_genomic	d__Bacteria;p__Fusobacteriota;c__Fusobacteriia;o__Fusobacteriales;f__Fusobacteriaceae;g__Fusobacterium;s__Fusobacterium animalis	4.78618e-06	2.61015e-06	3.48433e-06	8.95021e-06	8.80649e-07	2.0818e-07	1.09519e-06	0	9.70089e-06	1.08534e-06	8.22571e-07	2.22716e-06	2.79761e-07	9.57796e-07	2.41014e-07	2.23251e-06	0
218	fusobacterium	GCF_000479225.1_Fuso_nucl_CTI-5_V1_genomic	d__Bacteria;p__Fusobacteriota;c__Fusobacteriia;o__Fusobacteriales;f__Fusobacteriaceae;g__Fusobacterium;s__Fusobacterium animalis	4.06169e-06	2.25565e-06	4.50246e-06	3.30629e-06	2.91884e-07	6.70937e-08	5.12251e-07	0	5.77784e-06	6.59831e-07	5.23639e-07	1.12921e-06	2.12221e-07	7.2275e-07	0	1.26172e-07	0
219	fusobacterium	HeQ_2017__SZAXPI029494-94__bin.7	d__Bacteria;p__Fusobacteriota;c__Fusobacteriia;o__Fusobacteriales;f__Fusobacteriaceae;g__Fusobacterium;s__Fusobacterium animalis	1.4878e-05	5.40911e-06	2.74856e-06	6.1332e-06	4.62818e-07	1.02947e-07	6.35194e-07	0	9.24836e-06	7.05819e-07	4.64118e-07	6.9996e-07	1.75617e-07	3.47639e-07	0	1.83138e-06	0
220	fusobacterium	GCA_002573475.1_ASM257347v1_genomic	d__Bacteria;p__Fusobacteriota;c__Fusobacteriia;o__Fusobacteriales;f__Fusobacteriaceae;g__Fusobacterium;s__Fusobacterium animalis	5.169e-06	3.89058e-06	6.02689e-06	6.95535e-06	6.88805e-07	1.70475e-07	1.50375e-06	0	8.60667e-06	7.28877e-07	7.06024e-07	3.27525e-07	3.74133e-07	8.80748e-06	3.85025e-07	2.89401e-06	0
221	fusobacterium	QinN_2014__LD-28__bin.16	d__Bacteria;p__Fusobacteriota;c__Fusobacteriia;o__Fusobacteriales;f__Fusobacteriaceae;g__Fusobacterium;s__Fusobacterium animalis	0.000556205	0.000631852	0.000969063	0.00115918	0.000792921	0.000116814	0.000745612	0.00010708	0.000342751	0.000418632	6.87014e-05	0.000202853	0.000160636	2.79325e-05	0.000302134	0.000420319	0
222	fusobacterium	GCF_001296145.1_ASM129614v1_genomic	d__Bacteria;p__Fusobacteriota;c__Fusobacteriia;o__Fusobacteriales;f__Fusobacteriaceae;g__Fusobacterium;s__Fusobacterium animalis	3.89177e-06	2.7447e-06	4.52834e-06	3.66468e-06	6.87289e-07	1.6951e-07	7.51035e-07	3.28087e-07	2.42671e-06	5.12768e-07	4.68588e-07	1.03294e-06	1.2719e-07	7.19771e-07	0	8.70957e-07	0
223	fusobacterium	GCF_000158535.2_Fuso_nucl_D11_V2_genomic	d__Bacteria;p__Fusobacteriota;c__Fusobacteriia;o__Fusobacteriales;f__Fusobacteriaceae;g__Fusobacterium;s__Fusobacterium animalis	1.43733e-05	6.12849e-06	1.77388e-05	8.97008e-06	9.2747e-06	3.0607e-07	3.92543e-06	0	1.39353e-05	2.67147e-05	1.78618e-06	1.99793e-06	7.22948e-06	1.34443e-06	9.42265e-07	5.65977e-06	0
224	fusobacterium	GCF_000479245.1_Fuso_nucl_CTI-3_V1_genomic	d__Bacteria;p__Fusobacteriota;c__Fusobacteriia;o__Fusobacteriales;f__Fusobacteriaceae;g__Fusobacterium;s__Fusobacterium animalis	1.54227e-06	5.92898e-07	1.14652e-06	1.29049e-06	1.47597e-07	2.32869e-08	3.70388e-07	0	6.47373e-07	2.37682e-07	3.37444e-07	4.68486e-07	4.18099e-08	3.12767e-07	0	8.13949e-07	0
225	fusobacterium	GCF_000218645.2_Fusobacterium_sp_21_1A_V3_genomic	d__Bacteria;p__Fusobacteriota;c__Fusobacteriia;o__Fusobacteriales;f__Fusobacteriaceae;g__Fusobacterium;s__Fusobacterium animalis	1.53182e-06	4.87899e-07	1.38789e-06	1.13287e-06	5.113e-08	0	3.92745e-07	0	7.01171e-07	1.79248e-07	2.33935e-07	4.4579e-07	1.23276e-07	1.60232e-07	0	5.80615e-07	0

## Sheet: Table S9
phylogenetic sort order	clade	MAG ID	Hong Kong average	Austria average	France average	Germany average	USA average
1	cetobacterium	GCF_900167275.1_IMG-taxon_2585428148_annotated_assembly_genomic	5.36126e-08	0	2.3685e-07	0	2.84284e-08
2	cetobacterium	GCF_000799075.1_ZOR0034.1_genomic	0.00064072	0.00252204	0.00238603	0.00155732	0.00152004
3	cetobacterium	PHMST195.8.metabat2102.contigs	0.000504672	0.000337156	0.000130218	4.13333e-05	7.60582e-05
4	cetobacterium	M2-PK647A.12.metabat2102.contigs	5.49719e-05	9.89981e-06	2.85585e-05	7.18474e-06	9.77783e-06
5	cetobacterium	GCF_000479045.1_ASM47904v1_genomic	0.000147805	3.9586e-08	6.19986e-07	7.95805e-08	3.32708e-07
6	cetobacterium	S4_049.77.metabat2121.contigs	0.00030486	0	0	0	6.06635e-08
7	cetobacterium	ERS537231_106	0.00160945	0.000440595	0.00166055	0.00185077	0.00082442
8	fusobacterium_B	GCF_000622245.1_ASM62224v1_genomic	4.69036e-05	5.47741e-07	2.48562e-05	3.06658e-07	0.00055402
9	fusobacterium_B	ERS473221_41	0.00185977	0.000430673	0.000957994	0.000449391	0.000258622
10	fusobacterium_B	pHMST436_HF3YCDMXX.16.metabat2102.contigs	0.00116778	0.00257943	0.0026188	0.00206847	0.00340136
11	fusobacterium_B	S5_045.25.metabat2102_sub.contigs	0.00398731	5.63988e-08	2.76306e-05	1.02951e-07	1.60314e-06
12	fusobacterium_B	PGHST0050.31.contigs	0.000504562	0.000408209	0.000268116	0.000182016	0.000335761
13	fusobacterium_B	PGHST0005.006.contigs	0.0148231	0.00688711	0.00807642	0.0131191	0.00944042
14	fusobacterium_B	PHMST107.18.metabat2102.contigs	0.000138008	0.000219966	8.15408e-05	1.27338e-05	6.70001e-05
15	fusobacterium_B	ERR1620317_bin.28	4.13477e-05	1.48491e-06	2.96629e-05	1.16206e-05	0.000268573
16	fusobacterium_B	S3_031.44.metabat2102.contigs	0.00112281	1.06498e-06	1.69309e-06	2.63996e-07	0.000345828
17	fusobacterium_B	ERR1578622_bin.12	4.73077e-05	1.35586e-05	2.92998e-05	1.70185e-05	0.00107449
18	fusobacterium_B	PGHST0085.4.metabat2.contigs	0.000155751	5.8812e-06	5.51025e-06	0	0.000497488
19	fusobacterium_B	PHMST105.017_sub.contigs	0.00703426	0.00868067	0.00472574	0.00289859	0.0572094
20	fusobacterium_B	NielsenHB_2014__V1_CD16_0__bin.48	0.000467675	9.05582e-05	0.000540924	0	0.000809641
21	fusobacterium_B	S4_054.58.metabat2102.contigs	0.000660241	6.1797e-05	0.000527386	1.89795e-05	0.000692272
22	fusobacterium_B	QinJ_2012__DLM003__bin.18	0.000560089	2.11515e-05	0.000134316	5.84211e-05	0.000578831
23	fusobacterium_B	S4_044.17.metabat2121.contigs	0.000262129	2.6277e-06	5.00878e-07	0	0.000223317
24	fusobacterium_B	534A.23.metabat2102_sub.contigs	0.00230366	0.00110986	0.00309255	0.00359032	0.00365921
25	fusobacterium_B	pHMST299_HF3YCDMXX.014.contigs	0.0084114	0.00723207	0.00733924	0.00780313	0.00727793
26	fusobacterium_B	S2_055.22.metabat2102.contigs	0.0029246	3.65579e-06	5.95942e-06	2.72465e-07	0.000320645
27	fusobacterium_A	GCF_900015295.1_clos_1_1_genomic	0.00149136	2.03207e-05	4.29915e-05	8.9676e-06	1.5777e-05
28	fusobacterium_A	S4_015.30.metabat2102.contigs	0.00263514	1.78908e-05	2.86508e-05	2.29237e-05	1.41078e-05
29	fusobacterium_A	ERR209697_bin.20	0.00113624	0.000887075	0.000945186	0.00129035	0.00111258
30	fusobacterium_A	S6_021.28.metabat2102.contigs	0.00966981	0.00311072	0.00245501	0.00205667	0.00466453
31	fusobacterium_A	PHMST208.10.metabat2102.contigs	0.000122465	1.37147e-06	2.88686e-05	3.55344e-08	5.21916e-06
32	fusobacterium_A	SRS294816_53	0.0025697	2.19811e-05	0.000554002	3.1823e-06	0.00022189
33	fusobacterium_A	SRS259538_7	0.00190651	6.41137e-06	0.000747781	1.99177e-06	0.000241527
34	fusobacterium_A	WenC_2017__RA084__bin.4	0.00334591	0.000398065	0.00108719	0.000880869	0.00120375
35	fusobacterium_A	SRS023176_24	0.00200641	0.000120419	0.000830237	0.000406447	0.00107577
36	fusobacterium_A	GCF_003019315.1_ASM301931v1_genomic	0.0377629	0.000138243	0.0128631	4.61904e-06	0.00469567
37	fusobacterium_A	QinN_2014__LD-75__bin.51	0.00266804	6.60116e-06	0.000702876	2.88869e-06	0.000275181
38	fusobacterium_A	PHMST162.31.metabat2121.contigs	0.00405565	0.000436715	0.00095319	0.000231872	0.000327561
39	fusobacterium_A	GCF_003019655.1_ASM301965v1_genomic	0.0462492	0.000320469	0.000192877	0.000909856	1.0563e-05
40	fusobacterium_A	ERR1190605_bin.19	0.0261204	0.00203555	0.00414699	0.00525654	0.00451071
41	fusobacterium_A	GCF_002356455.1_ASM235645v1_genomic	0.000934044	4.87888e-05	0.0014281	4.73871e-06	1.11278e-05
42	fusobacterium_A	ERR1190609_bin.10	0.00167551	0.000255034	0.00021537	0.000134579	0.000407061
43	fusobacterium_A	ERR1190574_bin.24	0.00286613	0.00110699	0.00050756	0.000288187	0.000429505
44	fusobacterium_A	S3_021.31.metabat2121.contigs	0.00393748	0.000457843	1.49088e-06	4.07584e-06	1.43789e-05
45	fusobacterium_A	LiJ_2017__H3M518116__bin.17	0.00135734	0.00128363	0.00167898	0.000890934	0.000282869
46	fusobacterium_A	GCF_000242995.2_Fusobacterium_sp_12_1B_V2_genomic	0.000344014	0.00289263	1.8148e-06	9.28053e-06	5.25254e-05
47	fusobacterium_A	ERR414375_bin.2	0.0020257	0.0015937	0.000647804	0.000507989	0.001189
48	fusobacterium_A	S6_007.9.metabat2102.contigs	0.00419457	0.000288392	7.06964e-07	6.30297e-06	1.4081e-05
49	fusobacterium_A	CosteaPI_2017__donald4-11-7-0__bin.5	0.000305277	0.000509938	2.44861e-06	1.76102e-05	2.46301e-05
50	fusobacterium_A	GCF_900478315.1_34903_E01_genomic	0.000274225	0.000633669	7.79343e-07	6.21694e-06	4.95791e-05
51	fusobacterium_A	ERR1190611_bin.2	0.00125002	0.00110199	0.000337688	0.000157762	0.000609467
52	fusobacterium_A	PHMST205.24.metabat2102.contigs	0.000122305	9.08557e-08	3.02414e-05	0	8.40053e-05
53	fusobacterium_A	BackhedF_2015__SID385_12M__bin.43	0.000155545	4.83654e-06	0.000569399	7.05233e-07	0.000146908
54	fusobacterium_A	VogtmannE_2016__MMRS72802364ST-27-0-0__bin.41	0.00181886	0.00221819	0.00216559	0.000625194	0.00322742
55	fusobacterium_A	SRR341651_bin.15	0.000271103	6.44131e-05	0.000108319	8.36601e-05	0.00018433
56	fusobacterium_A	SRR341650_bin.10	0.00105621	0.000338231	0.000370567	0.000286943	0.000549943
57	fusobacterium_A	QinJ_2012__T2D-059__bin.19	0.000949971	0.000271572	0.000527551	0.000850543	0.000698793
58	fusobacterium_A	SRR5056852_bin.96	0.000232861	0.000415411	0.000693485	0.000165088	0.000489835
59	fusobacterium_A	QinN_2014__LV-17__bin.7	0.000203095	3.15874e-05	0.000120521	1.52949e-05	0.000270791
60	fusobacterium_A	S3_045.023.contigs	0.000818271	2.3007e-05	0.000198184	2.82719e-05	0.000110312
61	fusobacterium_A	WenC_2017__RA074__bin.38	0.00073335	0.000138083	0.000350183	0.000219922	0.000360398
62	fusobacterium_A	pHMST450.24.metabat2102.contigs	0.00011877	5.25006e-08	6.43586e-05	0	5.54985e-05
63	fusobacterium_A	SRR341703_bin.5	0.000313769	0.000187737	0.00014919	3.29055e-05	0.000151802
64	fusobacterium_A	SRR5275410_bin.24	0.000719225	0.000523862	0.000910504	0.000720007	0.000725993
65	fusobacterium_A	PHMST261.18.metabat2102_sub.contigs	0.000438617	0.000733459	0.0001438	7.08939e-05	0.000104212
66	fusobacterium_A	PHMST203.15.metabat2102.contigs	0.000576416	0.000166912	0.000147969	6.60235e-05	0.000110962
67	fusobacterium_A	SRS294858_1	0.00032693	0.000267418	0.00031305	0.000223446	0.000402536
68	fusobacterium_A	QinJ_2012__T2D-107__bin.31	0.000673904	0.000957205	0.00138275	0.000535022	0.00027511
69	fusobacterium_A	LiJ_2017__H3M516804__bin.49	0.00306989	0.00300882	0.00176747	0.00158832	0.0011338
70	fusobacterium_A	534A.003.contigs	0.00859626	0.00634143	0.00389575	0.00438438	0.0080297
71	fusobacterium_A	S5_032.27.metabat2102.contigs	0.00462599	0.000327199	0.000595119	0.000231652	0.000868537
72	fusobacterium_A	M2-PK017A.13.metabat2102.contigs	0.00170638	0.00014758	0.000473898	3.46669e-05	0.000321087
73	fusobacterium_A	pHMST454.21.metabat2102.contigs	7.42197e-05	1.05001e-07	0.000110695	2.44743e-08	0.000961687
74	fusobacterium_A	M118A.008_sub.contigs	0.0189151	0.0022241	0.00656473	0.00143956	0.00479651
75	fusobacterium_C	GCF_003019695.1_ASM301969v1_genomic	9.40395e-05	0.000159121	0.00586707	0.000473853	0.000116506
76	fusobacterium_C	GCF_001546395.1_ASM154639v1_genomic	0.000459842	0.000504152	0.00961011	0.000291037	0.000268725
77	fusobacterium_C	GCF_000158235.1_ASM15823v1_genomic	0.000102466	0.000281715	0.0122573	8.22322e-05	0.000330169
78	fusobacterium_C	GCF_900104395.1_IMG-taxon_2597490366_annotated_assembly_genomic	2.70138e-05	8.01745e-05	0.0013455	1.49222e-05	1.08293e-05
79	fusobacterium_C	GCF_003019715.1_ASM301971v1_genomic	3.25678e-05	0.000247341	0.00149468	3.09073e-05	3.61019e-05
80	fusobacterium_C	GCF_001596485.1_ASM159648v1_genomic	7.93046e-06	0.000150891	0.00210489	9.96822e-07	1.28142e-05
81	fusobacterium_C	GCF_000622045.1_ASM62204v1_genomic	1.80585e-05	0.000107877	0.00483665	8.99635e-06	1.85868e-05
82	fusobacterium	GCF_000381725.1_ASM38172v1_genomic	2.44885e-07	1.6019e-06	3.48754e-06	2.83573e-07	7.28622e-06
83	fusobacterium	HMP_2012__SRS013946__bin.14	1.23302e-06	7.80446e-07	2.26994e-06	1.6777e-06	3.62781e-07
84	fusobacterium	GCF_900095705.1_PRJEB15286_genomic	4.48175e-06	1.74686e-06	3.62002e-06	2.30482e-06	5.70085e-06
85	fusobacterium	HMP_2012__SRS053854__bin.9	1.89913e-05	2.15864e-05	9.78233e-05	2.11602e-05	1.98829e-05
86	fusobacterium	HMP_2012__SRS065335__bin.4	1.23782e-05	7.3097e-06	6.81051e-05	4.19779e-05	1.5818e-05
87	fusobacterium	GCF_002763695.1_ASM276369v1_genomic	5.1687e-05	2.3368e-05	2.92073e-05	2.11694e-05	3.39833e-05
88	fusobacterium	HMP_2012__SRS018591__bin.29	2.94575e-05	3.62734e-05	3.95371e-05	1.42164e-05	3.6577e-05
89	fusobacterium	HMP_2012__SRS017120__bin.10	0.000120821	0.000174691	0.00021513	8.41225e-05	0.000105028
90	fusobacterium	GCF_000297655.1_Fuso_PO_Taxon_201_D10_V1_genomic	2.15565e-06	6.19694e-06	5.65812e-06	5.18722e-06	6.55315e-06
91	fusobacterium	GCF_003019755.1_ASM301975v1_genomic	4.48758e-06	7.5621e-06	9.47787e-06	5.49064e-06	1.96014e-05
92	fusobacterium	HMP_2012__SRS019045__bin.8	3.032e-05	4.67835e-05	4.24371e-05	1.08727e-05	2.11617e-05
93	fusobacterium	HMP_2012__SRS013879__bin.12	2.75542e-05	3.99585e-05	3.77986e-05	2.01744e-05	2.16918e-05
94	fusobacterium	QinN_2014__LD-44__bin.19	0.00249921	0.00142526	0.00134485	0.000733113	0.00172687
95	fusobacterium	GCF_002763625.1_ASM276362v1_genomic	6.6582e-06	2.05067e-06	3.64895e-06	3.73701e-06	3.65684e-06
96	fusobacterium	GCF_002761955.1_ASM276195v1_genomic	0.000289802	0.000108919	6.55079e-05	4.11901e-05	5.51353e-05
97	fusobacterium	GCF_002763815.1_ASM276381v1_genomic	6.44085e-06	1.48368e-06	3.95261e-06	2.82318e-06	6.12391e-07
98	fusobacterium	GCF_002763735.1_ASM276373v1_genomic	5.39272e-06	1.14462e-06	1.55795e-06	2.68881e-06	4.676e-07
99	fusobacterium	GCF_002763595.1_ASM276359v1_genomic	4.81384e-06	1.20783e-06	1.49436e-06	2.85706e-06	2.81005e-06
100	fusobacterium	GCF_002761935.1_ASM276193v1_genomic	0.000419842	0.000207903	0.000103315	9.21653e-05	0.00011283
101	fusobacterium	HMP_2012__SRS044662__bin.14	0.000547031	1.84218e-05	2.67786e-05	3.70478e-05	6.95377e-06
102	fusobacterium	GCF_002763925.1_ASM276392v1_genomic	6.01416e-06	1.13872e-06	2.5369e-06	2.74115e-06	1.01852e-06
103	fusobacterium	GCF_002763775.1_ASM276377v1_genomic	5.43636e-06	7.11338e-07	1.27065e-06	1.43115e-06	9.98554e-07
104	fusobacterium	ERR1305880_bin.1	0.00133618	0.00307871	0.00133219	0.0010502	0.00110539
105	fusobacterium	HMP_2012__SRS062761__bin.9	0.000129393	0.000118814	0.000152019	4.9023e-05	6.14243e-05
106	fusobacterium	HMP_2012__SRS011243__bin.1	0.000160513	0.000281934	0.000199553	6.59959e-05	0.000104623
107	fusobacterium	HMP_2012__SRS063193__bin.25	8.41474e-05	9.08975e-05	5.00884e-05	2.00044e-05	3.02368e-05
108	fusobacterium	HMP_2012__SRS022530__bin.42	5.72695e-06	3.64013e-06	1.4089e-05	2.54618e-06	9.70635e-07
109	fusobacterium	HMP_2012__SRS016501__bin.16	1.93825e-05	1.94113e-05	1.45666e-05	3.26189e-06	1.44959e-05
110	fusobacterium	HMP_2012__SRS015644__bin.15	4.78008e-05	9.74664e-05	0.000168759	3.98394e-05	2.83834e-05
111	fusobacterium	HMP_2012__SRS011140__bin.15	0.000328095	0.000320114	0.000301051	0.000120358	0.00015419
112	fusobacterium	HMP_2012__SRS016002__bin.10	1.5494e-05	2.08253e-05	4.57662e-05	7.30266e-06	7.16694e-06
113	fusobacterium	HMP_2012__SRS043663__bin.5	2.95186e-06	5.20571e-06	3.93113e-06	6.83231e-06	1.39347e-06
114	fusobacterium	GCF_002763875.1_ASM276387v1_genomic	4.30742e-06	6.87217e-06	3.50481e-06	2.49489e-06	4.23244e-06
115	fusobacterium	HMP_2012__SRS024441__bin.58	2.09257e-05	1.082e-05	2.15828e-05	1.58371e-05	1.17055e-05
116	fusobacterium	HMP_2012__SRS020856__bin.44	0.000215122	0.000173563	0.000292416	0.000120213	0.000152108
117	fusobacterium	HMP_2012__SRS024580__bin.13	9.12406e-07	3.10335e-06	1.71087e-06	7.6236e-07	1.55012e-06
118	fusobacterium	HMP_2012__SRS062878__bin.31	4.60559e-05	5.30621e-05	5.20007e-05	1.75598e-05	2.16218e-05
119	fusobacterium	HMP_2012__SRS016225__bin.41	4.30521e-05	2.648e-05	5.84402e-05	2.30766e-05	1.76915e-05
120	fusobacterium	HMP_2012__SRS016037__bin.14	1.33893e-05	1.80506e-05	2.30888e-05	1.66005e-05	1.01459e-05
121	fusobacterium	HMP_2012__SRS024375__bin.4	9.15815e-05	5.59949e-05	6.85465e-05	2.88103e-05	3.74452e-05
122	fusobacterium	HMP_2012__SRS052227__bin.13	2.40828e-05	2.88626e-05	4.03101e-05	1.52978e-05	1.27347e-05
123	fusobacterium	HMP_2012__SRS013947__bin.20	1.60755e-05	1.49286e-05	1.83697e-05	7.29632e-06	5.94065e-06
124	fusobacterium	CM_cf__CF_TNFC040IS_t3M15__bin.13	4.7772e-05	4.57846e-05	4.40655e-05	1.79116e-05	2.90894e-05
125	fusobacterium	HMP_2012__SRS023958__bin.24	1.13609e-05	5.60258e-06	3.50818e-05	2.50638e-05	4.06216e-06
126	fusobacterium	HMP_2012__SRS011306__bin.55	1.6933e-05	1.32498e-05	1.63263e-05	5.3227e-06	7.74454e-06
127	fusobacterium	HMP_2012__SRS015762__bin.73	5.95897e-05	3.62682e-05	9.44923e-05	1.55534e-05	6.57189e-05
128	fusobacterium	HMP_2012__SRS053603__bin.6	2.38954e-05	2.38021e-05	6.688e-05	3.32651e-05	1.63306e-05
129	fusobacterium	Castro-NallarE_2015__ES_114__bin.5	0.000361393	0.000418602	0.000404226	0.000174787	0.000273664
130	fusobacterium	HMP_2012__SRS017808__bin.48	5.86733e-06	4.61235e-06	1.65049e-05	1.28111e-05	1.774e-06
131	fusobacterium	HMP_2012__SRS018357__bin.3	8.48108e-06	5.29042e-06	6.5153e-06	8.84011e-06	2.59988e-06
132	fusobacterium	HMP_2012__SRS023926__bin.12	0.000108799	8.24901e-05	0.000197808	7.02976e-05	7.65116e-05
133	fusobacterium	HMP_2012__SRS021954__bin.39	0.000221427	0.000446831	0.000312622	0.000150987	0.000186321
134	fusobacterium	HMP_2012__SRS017439__bin.41	0.000101409	5.30813e-05	5.9529e-05	2.47245e-05	4.39809e-05
135	fusobacterium	HMP_2012__SRS045127__bin.1	3.28922e-05	5.21324e-05	5.10282e-05	9.53904e-06	1.16251e-05
136	fusobacterium	GCF_000160475.1_ASM16047v1_genomic	4.9085e-05	1.02075e-05	3.55041e-05	6.7435e-05	3.16461e-05
137	fusobacterium	S6_018.46.metabat2121.contigs	0.00212743	0.00016993	0.00107334	0.00147172	0.000424789
138	fusobacterium	GCF_000235465.1_ASM23546v1_genomic	0.000267632	6.7512e-05	0.000436635	0.000706897	0.000156891
139	fusobacterium	ERS608583_20	0.00047032	0.00322682	0.000562304	0.000955908	0.000200136
140	fusobacterium	HMP_2012__SRS057355__bin.21	1.44318e-05	1.82159e-05	3.27004e-05	4.43963e-06	1.21529e-05
141	fusobacterium	HMP_2012__SRS050669__bin.36	3.93097e-06	1.11892e-05	5.79743e-06	4.39394e-06	2.49258e-06
142	fusobacterium	HMP_2012__SRS024277__bin.17	5.04517e-05	4.0696e-05	3.1947e-05	9.30173e-06	1.23563e-05
143	fusobacterium	HMP_2012__SRS018300__bin.72	8.64433e-06	3.07999e-06	6.1859e-06	1.48404e-05	2.00759e-06
144	fusobacterium	HMP_2012__SRS057692__bin.52	4.22308e-05	2.20342e-05	4.25482e-05	2.24937e-05	2.81359e-05
145	fusobacterium	GCF_000163935.1_ASM16393v1_genomic	7.7916e-06	3.24147e-06	2.45186e-05	1.65112e-05	4.44636e-06
146	fusobacterium	GCF_001455105.1_ASM145510v1_genomic	1.43634e-05	7.56094e-07	1.00472e-05	8.18365e-06	5.04182e-06
147	fusobacterium	GCF_001455085.1_ASM145508v1_genomic	1.42125e-05	1.15481e-06	4.98715e-06	4.44025e-06	2.10964e-06
148	fusobacterium	GCF_001455145.1_ASM145514v1_genomic	2.39951e-05	2.4307e-06	2.25807e-05	7.81989e-06	6.95877e-06
149	fusobacterium	GCF_000292935.1_ASM29293v1_genomic	1.94846e-05	1.49462e-06	1.28741e-05	6.9768e-06	5.793e-06
150	fusobacterium	HMP_2012__SRS019073__bin.24	0.000121481	8.43142e-05	0.000114228	5.90345e-05	6.01518e-05
151	fusobacterium	GCF_002591475.1_ASM259147v1_genomic	1.55324e-05	4.04295e-06	1.62037e-05	2.80401e-05	1.02537e-05
152	fusobacterium	HMP_2012__SRS065099__bin.53	1.39853e-05	3.66675e-06	3.43099e-05	3.35025e-05	2.78403e-05
153	fusobacterium	HMP_2012__SRS016043__bin.3	0.000230385	0.000166167	0.00031327	9.97348e-05	0.000111927
154	fusobacterium	GCF_002211625.1_ASM221162v1_genomic	1.30749e-05	5.61161e-06	2.79961e-05	1.95498e-05	1.73511e-05
155	fusobacterium	GCF_001433955.1_ASM143395v1_genomic	1.54153e-05	6.49045e-06	2.63087e-05	2.55021e-05	1.33742e-05
156	fusobacterium	GCF_000523555.1_Fuso_nucl_13_3C_V1_genomic	1.57698e-05	4.85369e-06	4.36304e-05	3.20025e-05	2.29193e-05
157	fusobacterium	GCF_000479185.1_Fuso_nucl_CTI-6_V1_genomic	2.17954e-05	3.90012e-06	3.26023e-05	2.24347e-05	1.44051e-05
158	fusobacterium	GCF_002202115.1_ASM220211v1_genomic	5.28878e-05	4.03978e-06	3.625e-05	1.83239e-05	7.87874e-06
159	fusobacterium	HMP_2012__SRS016541__bin.1	0.000200487	0.000552511	0.000454865	0.000127968	0.000188861
160	fusobacterium	GCF_003226385.1_ASM322638v1_genomic	1.75509e-05	1.30419e-05	4.19874e-05	2.06495e-05	1.41494e-05
161	fusobacterium	GCF_001457555.1_NCTC10562_genomic	1.66092e-05	5.65504e-06	8.80148e-05	2.41884e-05	2.40853e-05
162	fusobacterium	GCF_002591465.1_ASM259146v1_genomic	2.88327e-05	5.8702e-06	3.51635e-05	1.87644e-05	1.35288e-05
163	fusobacterium	GCF_001815715.1_ASM181571v1_genomic	1.68578e-05	4.93836e-06	3.58301e-05	3.73231e-05	3.07075e-05
164	fusobacterium	HMP_2012__SRS051930__bin.28	1.34716e-05	4.92394e-06	2.43695e-05	1.6769e-05	1.16192e-05
165	fusobacterium	GCF_000524235.1_FspOBRC1v1.0_genomic	2.00893e-05	7.378e-06	2.86899e-05	2.40536e-05	1.22673e-05
166	fusobacterium	HMP_2012__SRS075410__bin.36	2.06262e-05	9.94587e-06	2.68784e-05	1.9373e-05	1.31735e-05
167	fusobacterium	GCF_000524395.1_FspCM22v1.0_genomic	1.26527e-05	1.88516e-06	1.30578e-05	1.52421e-05	5.85828e-06
168	fusobacterium	HMP_2012__SRS011343__bin.54	1.89703e-05	2.67142e-05	2.97379e-05	1.77365e-05	1.72977e-05
169	fusobacterium	GCF_002591585.1_ASM259158v1_genomic	5.03636e-06	9.35706e-07	6.45319e-06	4.22343e-06	3.1721e-06
170	fusobacterium	GCF_002573625.1_ASM257362v1_genomic	1.70595e-05	3.01806e-06	3.12016e-05	2.55119e-05	8.8063e-06
171	fusobacterium	GCF_002761915.1_ASM276191v1_genomic	4.80579e-06	6.18931e-07	3.02179e-06	2.8147e-06	1.78584e-06
172	fusobacterium	GCF_002591505.1_ASM259150v1_genomic	7.21759e-06	5.60857e-07	5.151e-06	3.48692e-06	1.35215e-06
173	fusobacterium	CM_periimplantitis__SP_189SPI_T016__bin.8	0.000120064	4.27317e-05	0.000213147	6.80216e-05	7.24604e-05
174	fusobacterium	HMP_2012__SRS050628__bin.23	1.92246e-05	1.84357e-05	3.47397e-05	5.02446e-05	1.40212e-05
175	fusobacterium	GCF_002591555.1_ASM259155v1_genomic	3.53752e-05	5.46226e-06	4.68085e-05	5.27517e-05	1.76578e-05
176	fusobacterium	GCF_002204435.1_ASM220443v1_genomic	3.81085e-05	2.45884e-05	3.55914e-05	1.74696e-05	4.75753e-05
177	fusobacterium	GCF_002591645.1_ASM259164v1_genomic	1.11835e-05	2.5456e-06	1.0807e-05	7.80192e-06	7.05955e-06
178	fusobacterium	GCF_002591545.1_ASM259154v1_genomic	7.19734e-06	2.23469e-06	1.31024e-05	4.67205e-06	6.03246e-06
179	fusobacterium	GCF_002591515.1_ASM259151v1_genomic	5.20692e-06	1.00535e-06	7.87158e-06	3.70954e-06	6.33089e-06
180	fusobacterium	GCF_002243405.1_ASM224340v1_genomic	2.54738e-05	5.67786e-06	5.46644e-05	1.52143e-05	2.37241e-05
181	fusobacterium	CM_periimplantitis__SP_125SPI_T016__bin.3	1.6983e-05	4.3422e-06	3.80856e-05	2.13293e-05	1.341e-05
182	fusobacterium	CM_periimplantitis__SP_305SPI_T016__bin.16	9.67095e-05	3.87904e-05	8.68363e-05	8.22601e-05	6.22397e-05
183	fusobacterium	GCF_003019785.1_ASM301978v1_genomic	7.25719e-05	2.07419e-05	3.85839e-05	2.66771e-05	7.26901e-05
184	fusobacterium	GCF_002211605.1_ASM221160v1_genomic	4.3527e-05	5.67392e-06	6.51197e-06	6.83178e-06	2.56979e-05
185	fusobacterium	GCF_000479265.1_Fuso_nucl_CTI-2_V1_genomic	3.19011e-05	7.22763e-06	5.54984e-05	5.82267e-06	0.000120888
186	fusobacterium	GCF_003019295.1_ASM301929v1_genomic	3.68277e-05	5.74419e-06	1.36984e-05	4.4322e-06	3.78109e-05
187	fusobacterium	GCA_001296185.1_ASM129618v1_genomic	7.82012e-05	1.40735e-05	1.42953e-05	7.58337e-06	4.30997e-05
188	fusobacterium	CM_periimplantitis__SP_163SPI_T016__bin.2	3.58398e-05	2.65248e-05	9.91656e-05	1.87761e-05	1.58288e-05
189	fusobacterium	GCF_002764055.1_ASM276405v1_genomic	2.83912e-05	5.37045e-06	0.000128068	8.51461e-06	4.22299e-06
190	fusobacterium	GCF_001810995.1_ASM181099v1_genomic	8.94488e-06	2.3056e-06	4.96983e-05	3.14057e-06	3.05691e-06
191	fusobacterium	GCA_000182945.1_ASM18294v1_genomic	4.04268e-05	4.47937e-06	4.82465e-05	7.3762e-06	4.80096e-06
192	fusobacterium	GCF_000162235.2_ASM16223v2_genomic	1.70904e-05	4.14564e-05	9.18468e-05	8.50636e-06	5.23681e-06
193	fusobacterium	GCF_000163915.2_ASM16391v2_genomic	1.57417e-05	6.23653e-06	6.20582e-05	2.36245e-05	4.83964e-06
194	fusobacterium	GCF_000479205.1_Fuso_nucl_CTI-7_V1_genomic	1.58763e-05	5.67359e-06	0.000132775	1.92144e-05	6.50445e-06
195	fusobacterium	HMP_2012__SRS014477__bin.8	0.000113821	7.0936e-05	0.000173954	3.36856e-05	6.76573e-05
196	fusobacterium	GCF_002749995.1_ASM274999v1_genomic	3.82242e-05	8.75633e-06	0.000101093	7.78114e-06	7.10617e-06
197	fusobacterium	GCF_000158255.2_Fuso_sp_4_1_13_V2_genomic	1.25809e-05	1.56755e-05	9.01495e-05	4.47684e-05	1.06435e-05
198	fusobacterium	S5_031.27.metabat2121.contigs	0.00044016	8.10885e-05	6.44888e-05	2.0164e-05	1.83066e-05
199	fusobacterium	GCF_000493815.1_FN_W1481_genomic	0.000408315	0.000297321	0.000236793	5.97116e-05	0.000221523
200	fusobacterium	HMP_2012__SRS015061__bin.8	0.000274738	0.000142661	0.000211794	0.000105961	0.000213917
201	fusobacterium	CM_periimplantitis__SP_264SPI_T016__bin.4	0.000132705	7.12431e-05	6.25859e-05	5.01369e-05	5.07753e-05
202	fusobacterium	CM_periimplantitis__SP_285SPI_T016__bin.7	4.89289e-05	2.16128e-05	0.000191163	7.50263e-05	7.9852e-05
203	fusobacterium	GCF_000234075.2_Fuso_nucl_F0401_V2_genomic	4.30541e-05	6.14012e-05	3.36539e-05	0.000354653	0.000168143
204	fusobacterium	NielsenHB_2014__V1_CD35_1__bin.24	0.000668425	0.000193239	0.000105108	0.00026891	9.65183e-05
205	fusobacterium	GCA_002884895.1_ASM288489v1_genomic	0.000110543	8.63612e-05	3.11485e-05	0.000660239	0.000219472
206	fusobacterium	NielsenHB_2014__V1_CD18_3__bin.16	0.000563042	0.00115471	0.000552645	0.000682208	0.000496317
207	fusobacterium	GCF_001296085.1_ASM129608v1_genomic	4.55108e-05	2.99468e-05	3.35947e-05	0.000137516	9.08739e-05
208	fusobacterium	GCA_002762005.1_ASM276200v1_genomic	3.97234e-05	1.71906e-05	3.23128e-05	0.000137971	4.64481e-05
209	fusobacterium	GCF_000524215.1_FspCM1v1.0_genomic	2.70253e-05	2.20876e-05	2.80846e-05	0.000111784	6.80783e-05
210	fusobacterium	ERR209715_bin.6	0.000281085	0.000442466	0.000390912	0.000689191	0.000501252
211	fusobacterium	CM_periimplantitis__SP_387SPT_T016__bin.21	8.43633e-05	6.87346e-05	0.00011332	0.000154761	7.67848e-05
212	fusobacterium	GCF_000400875.1_ASM40087v1_genomic	3.24275e-05	0.000145323	6.60553e-05	0.000230078	8.80431e-05
213	fusobacterium	GCF_000242975.1_Fuso_nucl_OT_420_V1_genomic	3.50014e-05	2.62813e-05	3.58106e-05	0.000261584	6.72726e-05
214	fusobacterium	ERR1620272_bin.11	0.00596251	0.000422607	0.000637583	0.000383698	0.000464903
215	fusobacterium	S5_030.23.metabat2121.contigs	0.000977494	2.3366e-05	3.43306e-05	0.000151952	6.48577e-05
216	fusobacterium	GCF_001813745.1_ASM181374v1_genomic	1.56985e-05	8.07991e-06	1.41009e-05	8.70525e-05	2.08875e-05
217	fusobacterium	GCF_000218655.1_Fusobacterium_sp_11_3_2_V1_genomic	4.3437e-05	3.92682e-05	5.19231e-05	0.000381079	7.08906e-05
218	fusobacterium	GCF_000479225.1_Fuso_nucl_CTI-5_V1_genomic	3.48219e-05	2.44934e-05	2.98383e-05	0.00135921	7.4702e-05
219	fusobacterium	HeQ_2017__SZAXPI029494-94__bin.7	7.09189e-05	2.75185e-05	2.64595e-05	0.000392717	7.75631e-05
220	fusobacterium	GCA_002573475.1_ASM257347v1_genomic	5.18994e-05	3.49017e-05	3.87894e-05	0.000124196	8.02811e-05
221	fusobacterium	QinN_2014__LD-28__bin.16	0.000833831	0.000799683	0.000316546	0.000273472	0.000123691
222	fusobacterium	GCF_001296145.1_ASM129614v1_genomic	4.53264e-05	1.81816e-05	2.21574e-05	0.000103282	6.1821e-05
223	fusobacterium	GCF_000158535.2_Fuso_nucl_D11_V2_genomic	7.2007e-05	2.76138e-05	2.5951e-05	0.000191609	8.77615e-05
224	fusobacterium	GCF_000479245.1_Fuso_nucl_CTI-3_V1_genomic	1.84966e-05	1.05115e-05	1.28538e-05	0.000132639	2.79445e-05
225	fusobacterium	GCF_000218645.2_Fusobacterium_sp_21_1A_V3_genomic	2.18624e-05	1.0946e-05	1.18228e-05	0.000107917	2.66047e-05

[truncated: 6 more sheets: Table S10, Table S11, Table S12, Table S13, Table S14, Table S15]
